# Supplementary material for: Opioid-induced immunosuppression of brain myeloid cells in SIV-infected rhesus macaques
Source: Research Square preprint supplement (doi:10.21203/rs.3.rs-7394731/v1), 2025-09-18
Supplement: Supplementary file 1 [file 0f2ef96cba4ec76ae4aef2d6.xlsx]

## Sheet: human dataset
	sample	group	infection	species
1	ALS1	ALS	CTRL	human
2	ALS2	ALS	CTRL	human
3	ALS4	ALS	CTRL	human
4	ALS5	ALS	CTRL	human
5	DLBD-PD3	DLBD-PD	CTRL	human
6	LOAD26	LOAD	CTRL	human
7	LOAD27	LOAD	CTRL	human
8	LOAD28	LOAD	CTRL	human
9	Control	CTRL	CTRL	human
10	DLBD-PD4	DLBD-PD	CTRL	human
11	LOAD21	LOAD	CTRL	human
12	EOAD2	EOAD	CTRL	human
13	LOAD20	LOAD	CTRL	human
14	LOAD35	LOAD	CTRL	human
15	LOAD34	LOAD	CTRL	human
16	LOAD33	LOAD	CTRL	human
17	LOAD32	LOAD	CTRL	human
18	LOAD31	LOAD	CTRL	human
19	MS2	MS	CTRL	human
20	EOAD1	EOAD	CTRL	human
21	LG05	cART_HIV	cART_HIV	human
22	LG14	cART_HIV	cART_HIV	human
23	LG15	cART_HIV	cART_HIV	human
ALS: Amyotrophic Lateral Sclerosis
DLBD-PD: Dementia with Lewy bodies-Parkinson’s disease
EOAD: Early onset Alzheimer’s disease
LOAD: Late onset Alzheimer’s disease
MS: Multiple sclerosis

## Sheet: macaque dataset
	sample	group	infection	species
1	104T	CTRL	CTRL	macaque
2	106T	CTRL	CTRL	macaque
3	111T	CTRL	CTRL	macaque
4	120T	CTRL	CTRL	macaque
5	108T	cART_SIV	cART_SIV	macaque
6	109T	cART_SIV	cART_SIV	macaque
7	113T	cART_SIV	cART_SIV	macaque
8	121T	cART_SIV	cART_SIV	macaque
9	105T	MORPH	CTRL	macaque
10	110T	MORPH	CTRL	macaque
11	115T	MORPH	CTRL	macaque
12	116T	MORPH	CTRL	macaque
13	107T	cART_SIV_MORPH	cART_SIV	macaque
14	114T	cART_SIV_MORPH	cART_SIV	macaque
15	117T	cART_SIV_MORPH	cART_SIV	macaque
16	122T	cART_SIV_MORPH	cART_SIV	macaque
17	93T	Acute_SIV	Acute_SIV	macaque
18	94T	Acute_SIV	Acute_SIV	macaque
19	95T	Acute_SIV	Acute_SIV	macaque
20	23T	Chronic_SIV	Chronic_SIV	macaque
21	25T	Chronic_SIV	Chronic_SIV	macaque
22	31T	Chronic_SIV	Chronic_SIV	macaque
