# Supplementary material for: Opioid-induced immunosuppression of brain myeloid cells in SIV-infected rhesus macaques
Source: Research Square preprint supplement (doi:10.21203/rs.3.rs-7394731/v1), 2025-09-18
Supplement: Supplementary file 2 [file 1b8e1fc69fc2c8cc1adf67bb.xlsx]

## Sheet: Cluster 0
p_val	avg_log2FC	pct.1	pct.2	p_val_adj	cluster	gene
0	0.702735	0.908	0.796	0	0	C1QB
0	0.688722	0.914	0.798	0	0	C1QA
0	0.672135	0.789	0.702	0	0	CCL4L1
0	0.664788	0.894	0.791	0	0	VMO1
0	0.651251	0.837	0.714	0	0	C1QC
0	0.645937	0.672	0.577	0	0	LOC100430627
0	0.551763	0.634	0.524	0	0	LTC4S
0	0.528825	0.955	0.882	0	0	P2RY12
0	0.527102	0.71	0.607	0	0	CST3
0	0.523654	0.953	0.889	0	0	C3
0	0.514623	0.604	0.505	0	0	ITM2C
0	0.512015	0.834	0.707	0	0	CFD
0	0.499053	0.931	0.875	0	0	RNASET2
0	0.499007	0.894	0.811	0	0	MAF
0	0.482538	0.352	0.264	0	0	FOLR2
0	0.480203	0.948	0.899	0	0	TMSB4X
0	0.475572	0.768	0.686	0	0	SELPLG
0	0.462359	0.739	0.658	0	0	TYROBP
0	0.460766	0.91	0.858	0	0	CSF1R
0	0.45983	0.834	0.762	0	0	FTL
0	0.458005	0.972	0.932	0	0	LOC716834
0	0.450948	0.376	0.295	0	0	RARRES2
0	0.434053	0.919	0.848	0	0	MARCKS
0	0.423282	0.774	0.708	0	0	CX3CR1
0	0.422516	0.697	0.631	0	0	APOE
0	0.413627	0.649	0.588	0	0	LOC696748
0	0.410106	0.726	0.66	0	0	RPS27
0	0.406515	0.813	0.736	0	0	RPS27A-1
0	0.405799	0.528	0.461	0	0	CD63
0	0.405487	0.88	0.804	0	0	RPLP1
0	0.400015	0.819	0.751	0	0	RPS20
0	0.397851	0.59	0.53	0	0	CD81
0	0.397711	0.684	0.613	0	0	RPS11
0	0.397001	0.829	0.76	0	0	GPR34
0	0.396803	0.822	0.749	0	0	RPL27A
0	0.392862	0.682	0.621	0	0	RPS21
0	0.391546	0.56	0.511	0	0	SERPINA1
0	0.391201	0.701	0.633	0	0	RPS15
0	0.389376	0.575	0.526	0	0	CREG1
0	0.385793	0.678	0.615	0	0	RPL23A
0	0.382476	0.762	0.692	0	0	RPS14
0	0.377156	0.792	0.731	0	0	RPL38
0	0.376671	0.69	0.626	0	0	RPS28
0	0.371658	0.743	0.683	0	0	RPS29
0	0.370738	0.736	0.674	0	0	RPL30
0	0.369314	0.853	0.793	0	0	LOC705671
0	0.368607	0.627	0.568	0	0	RPL19
0	0.359506	0.7	0.644	0	0	RPS19
0	0.358136	0.731	0.668	0	0	RPL10
0	0.353979	0.798	0.741	0	0	BHLHE41
0	0.353353	0.668	0.61	0	0	RPS16
0	0.352532	0.788	0.719	0	0	RPS18
0	0.351566	0.688	0.63	0	0	RPL18
0	0.350537	0.628	0.574	0	0	RPL37A-1
0	0.350129	0.755	0.701	0	0	RGS10
0	0.349864	0.638	0.585	0	0	RPS13
0	0.349115	0.692	0.638	0	0	RPL13A
0	0.347598	0.796	0.732	0	0	RPL13
0	0.344992	0.97	0.932	0	0	KEG06-p10
0	0.344708	0.692	0.631	0	0	LOC703641
0	0.343557	0.596	0.547	0	0	RPS3
0	0.343229	0.759	0.632	0	0	CDH13
0	0.339231	0.612	0.565	0	0	RPS10
0	0.334527	0.722	0.668	0	0	RPLP2
0	0.333931	0.713	0.662	0	0	RPS23
0	0.333207	0.622	0.576	0	0	FAU
0	0.332971	0.658	0.597	0	0	RPL34
0	0.324628	0.808	0.754	0	0	RPL41
0	0.322873	0.891	0.817	0	0	SLC1A3
0	0.322368	0.666	0.619	0	0	LOC703455
0	0.319955	0.985	0.954	0	0	KEG06-p07
0	0.312996	0.829	0.784	0	0	ZFP36L2
0	0.311192	0.738	0.68	0	0	P2RY13
0	0.308274	0.944	0.941	0	0	KEG06-r02
0	0.305056	0.762	0.71	0	0	RPS8
0	0.303964	0.777	0.721	0	0	RPL23
0	0.297293	0.801	0.768	0	0	IFNGR1
0	0.291391	0.861	0.809	0	0	PSAP
0	0.290073	0.945	0.901	0	0	KEG06-p11
0	0.271643	0.888	0.832	0	0	KEG06-p13
0	0.27057	0.855	0.796	0	0	HTRA1
0	0.265922	0.881	0.844	0	0	KEG06-p04
0	0.263698	0.928	0.88	0	0	KEG06-p12
0	0.262969	0.789	0.751	0	0	TPT1
1.33e-304	0.262515	0.82	0.787	2.94e-300	0	YWHAH
2.09e-302	0.335561	0.587	0.542	4.62e-298	0	RPL35A
6.99e-302	0.344926	0.757	0.708	1.55e-297	0	KEG06-p06
1.54e-296	0.29164	0.688	0.65	3.41e-292	0	RPL21
1.2e-269	0.328871	0.554	0.51	2.64e-265	0	RPL27
1.37e-269	0.370215	0.475	0.424	3.04e-265	0	RASL10A
1.25e-261	0.306802	0.582	0.54	2.76e-257	0	UBA52
6.78e-260	0.359808	0.444	0.368	1.5e-255	0	ENPEP
2.97e-259	0.331919	0.53	0.483	6.56e-255	0	RPS17
4.03e-244	0.363697	0.457	0.412	8.91e-240	0	GPX4
1.02e-243	0.317012	0.559	0.517	2.26e-239	0	RPL11
4.29e-242	0.278999	0.71	0.695	9.49e-238	0	LAPTM5
4.24e-230	0.363656	0.436	0.386	9.38e-226	0	OLFML3
7.23e-224	0.267883	0.61	0.576	1.6e-219	0	LOC712274
3.24e-223	0.25948	0.576	0.534	7.16e-219	0	FCER1G
4.6e-222	0.311892	0.471	0.425	1.02e-217	0	AIF1
3.55e-215	0.281122	0.594	0.57	7.84e-211	0	RPL9
1.25e-214	0.280463	0.614	0.587	2.77e-210	0	RPL17
4.25e-210	0.27402	0.446	0.362	9.39e-206	0	NAV2
1.62e-209	0.28498	0.561	0.526	3.58e-205	0	RPL28
6.16e-199	0.268555	0.568	0.538	1.36e-194	0	RPS7
3.07e-193	0.342197	0.423	0.384	6.78e-189	0	TREML1
1.67e-189	0.286317	0.528	0.496	3.69e-185	0	RPS24
1.36e-188	0.316712	0.486	0.455	3.01e-184	0	ARL6IP5
5.55e-188	0.348441	0.31	0.257	1.23e-183	0	TMEM176B
9.58e-188	0.279929	0.59	0.566	2.12e-183	0	KCTD12
6.88e-180	0.334663	0.416	0.374	1.52e-175	0	ALOX5AP
7.52e-178	0.302854	0.463	0.427	1.66e-173	0	LOC703365
1.86e-174	0.27654	0.515	0.487	4.11e-170	0	RPL26
2.34e-172	0.275971	0.504	0.472	5.17e-168	0	RPL8
2.75e-169	0.266705	0.671	0.653	6.08e-165	0	TXNIP
2.96e-168	0.262661	0.564	0.538	6.55e-164	0	RPS15A
2.48e-167	0.301289	0.497	0.473	5.48e-163	0	MPEG1
1.55e-166	0.263746	0.57	0.553	3.43e-162	0	RPL5
3.29e-163	0.280502	0.525	0.507	7.26e-159	0	RPL3
4.33e-159	0.32064	0.375	0.335	9.57e-155	0	TOMM7
6.45e-150	0.304562	0.451	0.426	1.42e-145	0	C5AR1
5.01e-144	0.280046	0.497	0.473	1.11e-139	0	FCGR1A
5.38e-143	0.282033	0.441	0.412	1.19e-138	0	RPS25
4.88e-140	0.286989	0.586	0.57	1.08e-135	0	RHOB
9.73e-140	0.301489	0.44	0.405	2.15e-135	0	RPL37
2.41e-128	0.298833	0.385	0.354	5.33e-124	0	RPL36
3.29e-127	0.30656	0.318	0.281	7.27e-123	0	FCGRT-1
4.4e-127	0.298644	0.424	0.401	9.73e-123	0	RPL15
5.19e-127	0.253803	0.532	0.514	1.15e-122	0	TREM2
9.15e-124	0.260888	0.458	0.436	2.02e-119	0	RPL7A
5.72e-123	0.285951	0.393	0.367	1.26e-118	0	GMFG
2.87e-122	0.27721	0.441	0.418	6.34e-118	0	RPS2
5.24e-120	0.296938	0.393	0.369	1.16e-115	0	NINJ1
1.84e-113	0.295636	0.383	0.359	4.06e-109	0	COX4I1
1.84e-111	0.301612	0.287	0.252	4.06e-107	0	GATM
4.52e-111	0.302781	0.292	0.259	9.99e-107	0	GABARAPL2
9.54e-109	0.260724	0.446	0.428	2.11e-104	0	UBB
9.86e-109	0.280234	0.475	0.459	2.18e-104	0	CEBPB
1.43e-107	0.280459	0.381	0.359	3.15e-103	0	VDAC1
6e-107	0.276676	0.385	0.361	1.32e-102	0	CFL1
7.54e-107	0.262142	0.376	0.35	1.67e-102	0	ATP5F1E
4.32e-98	0.259185	0.397	0.376	9.55e-94	0	RPL35
5.13e-95	0.294734	0.262	0.226	1.13e-90	0	RAMP1
1.85e-94	0.252899	0.406	0.388	4.1e-90	0	RPS5
2.86e-93	0.265745	0.352	0.329	6.32e-89	0	GABARAP
3.76e-88	0.268096	0.333	0.309	8.3e-84	0	LOC718777
3.9e-85	0.254553	0.469	0.45	8.62e-81	0	LOC701504
3.04e-80	0.27509	0.435	0.419	6.71e-76	0	SLC25A4
4.11e-78	0.264897	0.325	0.305	9.07e-74	0	PPIB
2.86e-75	0.25461	0.388	0.374	6.31e-71	0	RNASE6
9.77e-67	0.257433	0.326	0.311	2.16e-62	0	ATP6V0E1
2.3e-65	0.251105	0.306	0.288	5.09e-61	0	GAPDH
4.28e-38	0.251592	0.389	0.39	9.45e-34	0	LOC106993838

## Sheet: Cluster 1
p_val	avg_log2FC	pct.1	pct.2	p_val_adj	cluster	gene
0	0.508876	0.595	0.409	0	1	PLD5
0	0.421787	0.552	0.345	0	1	NAV2
0	0.403687	0.551	0.315	0	1	NRP1
0	0.389773	0.99	0.897	0	1	AUTS2
0	0.386125	0.876	0.683	0	1	MAML2
0	0.384215	0.55	0.35	0	1	ZNF804A
0	0.381845	0.807	0.645	0	1	CDH13
0	0.372336	0.739	0.498	0	1	SLC24A3
0	0.368641	0.999	0.965	0	1	ZSWIM6
0	0.366417	0.999	0.963	0	1	SLC9A9
0	0.360345	0.895	0.708	0	1	SDK1
0	0.354099	0.708	0.499	0	1	ESRRG
0	0.347714	0.999	0.957	0	1	SLC8A1
0	0.342005	0.879	0.664	0	1	CACNB4
0	0.340196	0.762	0.554	0	1	MSR1
0	0.335559	0.998	0.962	0	1	VAV3
0	0.331943	0.551	0.322	0	1	LOC106999905
0	0.329517	0.846	0.66	0	1	LOC708686
0	0.322818	0.975	0.866	0	1	MERTK
0	0.321602	0.623	0.436	0	1	PDE4D
0	0.321578	0.94	0.789	0	1	ARL15
0	0.320099	0.522	0.311	0	1	ARHGAP6
0	0.319969	0.755	0.527	0	1	PRKCH
0	0.314974	0.999	0.974	0	1	ELMO1
0	0.31355	0.733	0.512	0	1	RGL1
0	0.308627	0.821	0.638	0	1	TNFRSF21
0	0.308369	0.891	0.695	0	1	SPRED1
0	0.307749	0.968	0.864	0	1	SSBP2
0	0.307491	0.439	0.258	0	1	ZEB1
0	0.307007	0.597	0.376	0	1	PLXNA2
0	0.305868	0.37	0.206	0	1	CSGALNACT1
0	0.300299	0.951	0.838	0	1	LRMDA
0	0.299621	0.972	0.87	0	1	MAP4K4
0	0.297623	0.969	0.85	0	1	TCF12
0	0.29729	0.979	0.866	0	1	DNM3
0	0.297091	0.828	0.612	0	1	INPP4B
0	0.294789	0.999	0.973	0	1	QKI
0	0.293149	0.962	0.852	0	1	HDAC9
0	0.289588	0.694	0.476	0	1	ITGAV
0	0.286816	0.745	0.532	0	1	TTC28
0	0.286537	0.848	0.659	0	1	NFIA
0	0.285708	0.931	0.79	0	1	PDE3B
0	0.285218	0.976	0.867	0	1	MAN1A1
0	0.284024	0.863	0.653	0	1	PTPRM
0	0.282412	0.662	0.442	0	1	CDK6
0	0.282182	0.56	0.345	0	1	ENPEP
0	0.281882	0.817	0.589	0	1	ASTN1
0	0.281691	0.737	0.55	0	1	WWOX
0	0.281438	0.658	0.494	0	1	IMMP2L
0	0.280554	0.578	0.373	0	1	SLC7A8
0	0.280132	0.696	0.476	0	1	EDA
0	0.2788	0.997	0.952	0	1	CC2D2B
0	0.277698	0.77	0.549	0	1	FAM13A
0	0.277625	0.988	0.897	0	1	EPB41L2
0	0.277272	0.916	0.735	0	1	SFMBT2
0	0.275683	0.99	0.921	0	1	KCNQ3
0	0.275495	0.757	0.559	0	1	SUPT3H
0	0.275018	0.754	0.52	0	1	VWF
0	0.271203	0.826	0.634	0	1	PHLPP1
0	0.270929	0.981	0.872	0	1	NCKAP5
0	0.270429	0.997	0.942	0	1	MED13L
0	0.269711	0.802	0.577	0	1	ETV5
0	0.269359	0.482	0.283	0	1	AMOTL1
0	0.268289	0.874	0.677	0	1	MGAT5
0	0.265803	0.348	0.214	0	1	THSD4
0	0.265617	0.937	0.787	0	1	ARHGAP21
0	0.265524	0.884	0.711	0	1	SESN3
0	0.263339	0.722	0.509	0	1	FAM126A
0	0.26194	0.452	0.273	0	1	45354
0	0.261215	0.997	0.952	0	1	PICALM
0	0.261015	0.821	0.619	0	1	PLCL2
0	0.260922	0.582	0.387	0	1	LOC114676845
0	0.259104	0.747	0.518	0	1	PGM5
0	0.258481	0.423	0.242	0	1	SEMA6A
0	0.257521	0.814	0.614	0	1	RFX3
0	0.256876	0.737	0.521	0	1	SETBP1
0	0.256447	0.983	0.91	0	1	ASTN2
0	0.253114	0.56	0.367	0	1	LRRC8C
0	0.25259	0.678	0.454	0	1	SOBP
0	0.2521	0.976	0.893	0	1	MTSS1
0	0.251917	0.984	0.903	0	1	ITPR2
0	0.251531	0.832	0.635	0	1	RAPGEF2
0	0.251196	0.976	0.862	0	1	SIPA1L2
0	0.251159	0.96	0.819	0	1	WDFY3
0	0.250763	0.999	0.985	0	1	SRGAP2

## Sheet: Cluster 2
p_val	avg_log2FC	pct.1	pct.2	p_val_adj	cluster	gene
0	1.2583	0.542	0.347	0	2	SPP1
0	1.08446	0.617	0.311	0	2	RASAL2
0	1.05471	0.827	0.544	0	2	CD74
0	1.02724	0.653	0.325	0	2	MAMU-DRA
0	0.885427	0.34	0.121	0	2	CADM1
0	0.869399	0.555	0.24	0	2	MAMU-DRB1
0	0.78127	0.661	0.391	0	2	AKT3
0	0.750503	0.624	0.35	0	2	SHTN1
0	0.724282	0.799	0.562	0	2	OLR1
0	0.72353	0.907	0.71	0	2	ARHGAP26
0	0.590889	0.32	0.152	0	2	ITPR1
0	0.583237	0.542	0.353	0	2	LOC114671761
0	0.581452	0.321	0.19	0	2	CLEC7A
0	0.543382	0.851	0.718	0	2	TGFBR2
0	0.514299	0.701	0.54	0	2	SYNDIG1
0	0.505191	0.287	0.112	0	2	MAMU-DRB5
0	0.495831	0.534	0.357	0	2	MAP2
0	0.476645	0.471	0.314	0	2	SLC11A1
0	0.442431	0.956	0.868	0	2	HDAC9
0	0.422775	0.339	0.202	0	2	LOC106992862
0	0.399039	0.279	0.139	0	2	GRK3
0	0.380576	1	0.98	0	2	PLXDC2
0	0.379164	0.895	0.785	0	2	JUN
0	0.354764	0.965	0.907	0	2	ARHGAP24
0	0.340153	0.981	0.922	0	2	NAV3
0	0.336636	0.998	0.963	0	2	ST6GALNAC3
0	0.325483	0.885	0.782	0	2	MNDA
0	0.300015	0.971	0.91	0	2	ARHGAP15
2.78e-306	0.380033	0.852	0.749	6.14e-302	2	KLF6
4.08e-304	0.394686	0.76	0.634	9.02e-300	2	PTPN12
4.4e-274	0.343987	0.813	0.685	9.72e-270	2	ADAM28
2.03e-268	0.433127	0.354	0.23	4.49e-264	2	LY75
7.35e-268	0.407023	0.328	0.205	1.62e-263	2	FAM129A
1.53e-257	0.385725	0.535	0.398	3.38e-253	2	KCNIP1
2.85e-254	0.440056	0.371	0.248	6.3e-250	2	TANC2
4.86e-246	0.364588	0.409	0.278	1.07e-241	2	TMEM156
2.38e-236	0.292582	0.815	0.703	5.27e-232	2	FOSB
1.22e-231	0.41224	0.532	0.401	2.69e-227	2	RASGEF1B
1.44e-231	0.428112	0.443	0.32	3.17e-227	2	NEDD9
8.47e-227	0.385237	0.253	0.151	1.87e-222	2	JAZF1
5.73e-218	0.348656	0.776	0.668	1.27e-213	2	TBC1D9
2.66e-217	0.316691	0.684	0.571	5.87e-213	2	FAM49B
2.8e-214	0.310911	0.786	0.686	6.19e-210	2	BTG2
8.49e-210	0.384736	0.453	0.332	1.88e-205	2	TLR2
1.01e-206	0.250086	0.944	0.878	2.24e-202	2	FGD4
4.23e-203	0.334221	0.557	0.435	9.34e-199	2	MTHFD1L
6.82e-203	0.338592	0.77	0.666	1.51e-198	2	IPCEF1
1.71e-202	0.288265	0.863	0.771	3.78e-198	2	OXR1
3.97e-201	0.325074	0.783	0.683	8.78e-197	2	YWHAZ
1.16e-200	0.367233	0.527	0.403	2.57e-196	2	RTN1
8.6e-200	0.353246	0.752	0.646	1.9e-195	2	RANBP9
5.34e-199	0.349041	0.657	0.542	1.18e-194	2	JUNB
4.19e-198	0.412724	0.534	0.42	9.26e-194	2	ACSL4
4.64e-193	0.278074	0.845	0.759	1.02e-188	2	CCNL1
2.61e-190	0.336153	0.637	0.522	5.77e-186	2	EPS8
2.93e-190	0.329946	0.525	0.406	6.46e-186	2	KLF4
1.35e-186	0.302886	0.692	0.579	2.98e-182	2	KCNK13
1.32e-184	0.288234	0.279	0.179	2.93e-180	2	UTRN
2.68e-184	0.267759	0.952	0.904	5.92e-180	2	CD83
5.79e-183	0.339913	0.705	0.598	1.28e-178	2	STK17B
9.7e-179	0.341975	0.533	0.419	2.14e-174	2	PARP8
1.23e-176	0.312248	0.599	0.491	2.72e-172	2	MCL1
6.04e-170	0.262195	0.724	0.62	1.33e-165	2	FOS
4.89e-167	0.352164	0.535	0.426	1.08e-162	2	ZNRF2
3.54e-166	0.326778	0.375	0.271	7.82e-162	2	EGR3
1.61e-162	0.276544	0.725	0.622	3.56e-158	2	PMAIP1
9.08e-160	0.366175	0.522	0.415	2.01e-155	2	MAPRE2
9.42e-153	0.265079	0.608	0.502	2.08e-148	2	KYNU
8.03e-149	0.307981	0.286	0.198	1.77e-144	2	TBC1D8
1.99e-145	0.325331	0.427	0.33	4.4e-141	2	OTUD1
2.83e-141	0.281445	0.719	0.617	6.26e-137	2	FNDC3B
9.77e-140	0.279983	0.662	0.563	2.16e-135	2	PLA2G4A
1.27e-139	0.269394	0.615	0.514	2.8e-135	2	ELOVL5
3.17e-134	0.253276	0.327	0.238	7.01e-130	2	TRERF1
3.75e-134	0.262415	0.417	0.322	8.29e-130	2	LOC701439
2.87e-132	0.307235	0.56	0.467	6.34e-128	2	IER2
4.12e-131	0.322156	0.348	0.258	9.1e-127	2	DUSP10
1.74e-127	0.342284	0.253	0.174	3.84e-123	2	TMX4
2.59e-126	0.345888	0.567	0.476	5.72e-122	2	LOC694064
1.98e-121	0.283228	0.753	0.662	4.38e-117	2	TSC22D2
7.4e-119	0.309156	0.5	0.412	1.64e-114	2	ZC3H13
9.15e-118	0.333465	0.307	0.226	2.02e-113	2	PPP2R2B
1.48e-115	0.317736	0.267	0.189	3.27e-111	2	RNF150
4.79e-114	0.459805	0.493	0.413	1.06e-109	2	PLEK
6.35e-113	0.273879	0.495	0.404	1.4e-108	2	LRRC8C
5.11e-110	0.358354	0.572	0.489	1.13e-105	2	HK2
4e-108	0.308553	0.471	0.388	8.84e-104	2	LCP1
2.18e-102	0.299695	0.375	0.295	4.81e-98	2	BASP1
2.15e-97	0.284451	0.77	0.699	4.75e-93	2	LOC708686
2.13e-95	0.26847	0.575	0.49	4.71e-91	2	TNFAIP8L3
9.34e-94	0.262726	0.441	0.364	2.06e-89	2	ATP1A1
4.97e-90	0.282099	0.538	0.458	1.1e-85	2	MYO1E
3.2e-79	0.329493	0.718	0.651	7.08e-75	2	APOE
4.19e-79	0.256088	0.341	0.271	9.25e-75	2	ELL2
2.12e-77	0.269092	0.668	0.598	4.68e-73	2	MSR1
5.04e-65	0.251093	0.645	0.577	1.11e-60	2	HIST1H2AC
1.08e-51	0.337914	0.365	0.31	2.39e-47	2	FAM107B
7.09e-51	0.26403	0.374	0.316	1.57e-46	2	CRIM1

## Sheet: Cluster 3
p_val	avg_log2FC	pct.1	pct.2	p_val_adj	cluster	gene
0	1.70359	0.999	0.998	0	3	LOC114674534
0	1.52954	0.843	0.916	0	3	ABR
0	1.34392	1	1	0	3	LOC109910387
0	0.983546	0.776	0.882	0	3	LDLRAD4
2.75e-212	1.25487	0.542	0.598	6.09e-208	3	PLCB2
5.4e-199	0.672489	0.722	0.878	1.19e-194	3	PALD1
7.36e-186	0.658256	0.779	0.911	1.63e-181	3	ARHGAP22
5.54e-158	0.417906	0.858	0.959	1.22e-153	3	SNX29
2.79e-114	0.256665	0.304	0.559	6.15e-110	3	SF3B1
1.36e-111	0.250416	0.254	0.465	3e-107	3	TCERG1
2.28e-110	0.254382	0.232	0.432	5.03e-106	3	TCF25
1.79e-107	0.252172	0.155	0.303	3.95e-103	3	TPR
2.55e-106	0.528548	0.732	0.883	5.64e-102	3	SH3RF3
5.69e-100	0.252721	0.161	0.309	1.26e-95	3	CYTH4
3.36e-99	0.272216	0.242	0.429	7.42e-95	3	NMD3
2.21e-96	0.254777	0.311	0.552	4.88e-92	3	DIP2A
7.82e-96	0.329763	0.257	0.463	1.73e-91	3	EIF3A
4.56e-95	0.25801	0.193	0.352	1.01e-90	3	SCARB1
4.62e-95	0.273305	0.167	0.314	1.02e-90	3	BAZ1B
3.57e-93	0.276822	0.261	0.461	7.89e-89	3	TAL1
6.97e-93	0.291338	0.3	0.512	1.54e-88	3	WDPCP
2.7e-92	0.263815	0.165	0.305	5.96e-88	3	GCC2
4.32e-91	0.338949	0.206	0.368	9.55e-87	3	SCLT1
2.24e-89	0.287872	0.34	0.555	4.95e-85	3	HSPH1
2.33e-89	0.911098	0.551	0.697	5.16e-85	3	SRRM2
4.16e-88	1.07882	0.483	0.56	9.19e-84	3	SP110
6.47e-88	0.339397	0.197	0.358	1.43e-83	3	CHD4
1.39e-85	0.278431	0.221	0.39	3.06e-81	3	MLXIP
6.18e-85	0.711965	0.599	0.776	1.37e-80	3	CMIP
9.17e-84	0.315367	0.24	0.423	2.03e-79	3	FMNL1
8.35e-83	0.28924	0.322	0.556	1.85e-78	3	TBC1D14
1.1e-81	0.312147	0.244	0.426	2.43e-77	3	ZFC3H1
1.93e-81	0.252395	0.17	0.307	4.26e-77	3	BANP
2.94e-81	0.275223	0.174	0.312	6.5e-77	3	RNF169
3.99e-81	0.400784	0.235	0.403	8.82e-77	3	PANX1
5.08e-81	0.267681	0.178	0.317	1.12e-76	3	RNPC3
1.41e-80	0.327749	0.177	0.32	3.11e-76	3	ACIN1
8.38e-80	0.265284	0.374	0.628	1.85e-75	3	TBXAS1
9.1e-80	0.311854	0.236	0.411	2.01e-75	3	PARP14
1.89e-79	0.277492	0.158	0.288	4.18e-75	3	RGS12
3.97e-79	0.358259	0.322	0.55	8.78e-75	3	HERC3
9.01e-79	0.296287	0.181	0.324	1.99e-74	3	D2HGDH
3.04e-78	0.301246	0.163	0.295	6.72e-74	3	BATF3
5.99e-78	0.254421	0.134	0.25	1.32e-73	3	ARAP1
1.09e-75	0.314568	0.203	0.355	2.4e-71	3	ERICH1
3.34e-74	0.797287	0.565	0.724	7.38e-70	3	ANKRD11
1.05e-73	0.30462	0.154	0.273	2.32e-69	3	HPGDS
1.42e-73	0.346097	0.293	0.499	3.13e-69	3	SPEN
6.88e-73	0.290262	0.312	0.524	1.52e-68	3	PRKAG2
8.41e-73	0.257957	0.236	0.399	1.86e-68	3	LOXHD1
3.94e-72	0.397984	0.246	0.427	8.71e-68	3	PER1
8.03e-71	0.363726	0.281	0.481	1.77e-66	3	FKBP15
4.91e-67	0.282486	0.363	0.61	1.08e-62	3	GNB1
2.1e-66	0.296837	0.157	0.274	4.64e-62	3	FGD2
6.09e-66	0.281642	0.263	0.431	1.34e-61	3	KCNIP1
8.63e-66	0.328914	0.177	0.305	1.91e-61	3	RAB11FIP5
8.96e-65	0.266111	0.156	0.271	1.98e-60	3	SSBP3
3.35e-64	0.292436	0.147	0.256	7.4e-60	3	LOC702046
5.56e-64	0.408557	0.28	0.465	1.23e-59	3	KIAA1328
2.64e-63	0.325339	0.159	0.276	5.84e-59	3	CEP295
2.8e-62	0.292859	0.346	0.573	6.19e-58	3	TNS3
3.38e-61	0.473311	0.346	0.569	7.47e-57	3	HSP90AA1
4.19e-60	0.362738	0.238	0.399	9.25e-56	3	VAV1
1.54e-59	0.38937	0.261	0.435	3.4e-55	3	NEMF
1.76e-59	0.27416	0.165	0.277	3.89e-55	3	CCND3
5.67e-59	0.315949	0.164	0.279	1.25e-54	3	SH3GL1
1.75e-58	0.365198	0.283	0.467	3.86e-54	3	NEK6
2.08e-58	0.392137	0.27	0.451	4.6e-54	3	BRD4
1.61e-57	0.353503	0.194	0.32	3.57e-53	3	CCDC7
3.37e-56	0.33963	0.201	0.336	7.45e-52	3	RPTOR
3.47e-56	0.867324	0.51	0.63	7.67e-52	3	GNG7
3.97e-56	0.45771	0.261	0.434	8.76e-52	3	LUC7L3
1.57e-55	0.329447	0.347	0.574	3.47e-51	3	OGT
1.72e-55	0.296963	0.157	0.262	3.79e-51	3	LOC702071
8.84e-55	0.251913	0.387	0.627	1.95e-50	3	ZNF710
8.83e-54	0.300565	0.81	0.957	1.95e-49	3	INPP5D
3.76e-53	0.291941	0.167	0.277	8.3e-49	3	NOL4L
5.83e-53	0.252511	0.403	0.648	1.29e-48	3	SCAPER
9.72e-53	0.377355	0.204	0.333	2.15e-48	3	CORO7
1.85e-52	0.376816	0.324	0.53	4.09e-48	3	PMEPA1
5.85e-52	0.325945	0.155	0.26	1.29e-47	3	ITPK1
1.91e-51	0.395357	0.238	0.39	4.22e-47	3	CDC42BPB
6.08e-50	0.521139	0.234	0.374	1.34e-45	3	ADGRE5
1.14e-49	0.288612	0.188	0.302	2.51e-45	3	ROR2
1.32e-48	0.3725	0.379	0.626	2.91e-44	3	PRPF4B
1.41e-48	0.892004	0.494	0.596	3.12e-44	3	RASGEF1C
1.66e-48	0.399342	0.252	0.41	3.66e-44	3	PIK3CD
2.76e-48	0.369293	0.177	0.287	6.09e-44	3	FAM120B
2.94e-48	0.40779	0.196	0.319	6.49e-44	3	CCAR1
4.83e-48	0.389968	0.302	0.479	1.07e-43	3	HDAC8
8.55e-48	0.38306	0.154	0.256	1.89e-43	3	SAFB2
2.14e-47	0.403271	0.208	0.335	4.73e-43	3	LOC109910386
5.35e-47	0.430406	0.279	0.449	1.18e-42	3	SENP5
8.66e-47	0.454643	0.233	0.375	1.91e-42	3	DHRSX
1.33e-46	0.297733	0.382	0.614	2.94e-42	3	INPP4A
1.61e-46	0.487138	0.294	0.474	3.55e-42	3	AKAP9
2.02e-46	0.439131	0.266	0.432	4.47e-42	3	ADCY7
1.94e-45	1.09665	0.38	0.423	4.29e-41	3	RASA3
3.65e-45	0.301416	0.396	0.638	8.06e-41	3	CUX1
1.89e-44	0.338154	0.386	0.62	4.18e-40	3	ATRX
2.31e-44	0.48125	0.298	0.483	5.11e-40	3	BDP1
1.07e-43	0.425098	0.168	0.272	2.36e-39	3	ZMAT1
1e-42	0.393109	0.242	0.382	2.21e-38	3	SPNS2
1.8e-42	0.324513	0.396	0.624	3.98e-38	3	DST
6.03e-42	0.856647	0.495	0.629	1.33e-37	3	MCF2L
1.89e-41	0.384438	0.335	0.53	4.18e-37	3	ST6GAL1
7.69e-41	0.306292	0.35	0.545	1.7e-36	3	LOC718454
3.35e-40	0.487602	0.257	0.405	7.41e-36	3	ATP11A
5.81e-40	0.365415	0.16	0.254	1.28e-35	3	CARD11
6.24e-40	0.252817	0.281	0.416	1.38e-35	3	FHIT
5.7e-39	0.749486	0.552	0.721	1.26e-34	3	BIN1
8.61e-37	0.408333	0.218	0.339	1.9e-32	3	DNMT3A
5.08e-36	0.603484	0.579	0.777	1.12e-31	3	CYFIP1
8.1e-36	0.506852	0.222	0.347	1.79e-31	3	ARHGAP45
1.38e-35	0.442882	0.168	0.262	3.04e-31	3	GANC
2.78e-35	0.491573	0.196	0.307	6.15e-31	3	PLXNB2
1.18e-34	0.353729	0.286	0.409	2.61e-30	3	NAV2
1.82e-34	0.31539	0.444	0.701	4.03e-30	3	RNF130
2.55e-34	0.521801	0.259	0.405	5.63e-30	3	SNRNP70
7.14e-34	0.334563	0.266	0.39	1.58e-29	3	LOC114671761
1.3e-32	0.439374	0.174	0.269	2.88e-28	3	PIEZO1
6.48e-31	0.488746	0.242	0.366	1.43e-26	3	SUSD4
7.07e-31	0.465292	0.266	0.41	1.56e-26	3	EHMT1
3.71e-30	0.417483	0.379	0.595	8.19e-26	3	BPTF
1.61e-29	0.470123	0.319	0.494	3.55e-25	3	CNTRL
9.86e-29	0.436479	0.165	0.251	2.18e-24	3	MYO18A
3.41e-28	0.420397	0.206	0.308	7.53e-24	3	RAP1GAP2
4.23e-28	0.2964	0.75	0.941	9.35e-24	3	CAPZB
1.13e-27	0.48139	0.391	0.621	2.49e-23	3	PRRC2C
5.05e-27	0.397766	0.425	0.677	1.12e-22	3	LRP1
9.38e-27	0.397812	0.411	0.644	2.07e-22	3	PBRM1
1.46e-26	0.264114	0.492	0.753	3.23e-22	3	FLI1
1.85e-26	0.474738	0.21	0.314	4.08e-22	3	SPNS3
3.52e-26	0.466312	0.269	0.407	7.78e-22	3	MYO9B
2.81e-24	0.468232	0.61	0.827	6.2e-20	3	PREX1
4.33e-24	0.45651	0.381	0.598	9.57e-20	3	PNISR
5.21e-24	0.495948	0.225	0.334	1.15e-19	3	DPP7
3.4e-23	0.537044	0.245	0.366	7.52e-19	3	TEP1
1.76e-21	0.558151	0.609	0.831	3.88e-17	3	ARGLU1
3.25e-21	0.266016	0.479	0.733	7.17e-17	3	PACSIN2
3.46e-21	1.04137	0.366	0.431	7.65e-17	3	SKI
2.52e-20	0.540742	0.273	0.409	5.57e-16	3	NCOR2
5.89e-18	0.555091	0.37	0.563	1.3e-13	3	GOLGA4
8.45e-18	0.46047	0.392	0.597	1.87e-13	3	CTBP2
5.22e-17	0.581543	0.228	0.33	1.15e-12	3	ARHGAP4
6.98e-17	0.439213	0.423	0.649	1.54e-12	3	PFKFB3
1.38e-15	0.626168	0.513	0.694	3.05e-11	3	TBC1D22A
5.47e-13	0.674193	0.492	0.653	1.21e-08	3	KCNQ1
1.7e-12	0.522371	0.373	0.558	3.76e-08	3	NFIC
3.89e-10	0.426085	0.436	0.643	8.6e-06	3	FAM53B
7.04e-10	0.4954	0.417	0.596	1.56e-05	3	VWF
1.49e-09	0.530958	0.347	0.504	3.28e-05	3	MINK1
1.02e-07	0.496935	0.409	0.609	0.0022512	3	DNM2
1.05e-07	0.704534	0.272	0.379	0.00232502	3	BOD1L1
1.41e-07	0.506335	0.37	0.521	0.00311299	3	CACNA1A
4.32e-07	0.400649	0.478	0.68	0.00954991	3	COMMD10
1.4e-06	0.322226	0.631	0.85	0.0309455	3	CAMK1D
2.72e-05	0.740864	0.27	0.37	0.600163	3	LOC114669903
4.72e-05	0.59475	0.371	0.526	1	3	HIVEP3
0.000217644	0.387053	0.515	0.745	1	3	FGFR1
0.00061346	0.8277	0.319	0.388	1	3	LOC709175
0.00113557	0.506157	0.45	0.624	1	3	APPL2
0.00143123	0.451178	0.459	0.676	1	3	ARRB1
0.00201922	0.588162	0.475	0.665	1	3	TNRC18
0.00362941	0.610156	0.413	0.6	1	3	RBM25

## Sheet: Cluster 4
p_val	avg_log2FC	pct.1	pct.2	p_val_adj	cluster	gene
0	1.86235	0.658	0.094	0	4	MX1
0	1.76527	0.705	0.163	0	4	IFI44L
0	1.60274	0.622	0.16	0	4	IFI6
0	1.51017	0.545	0.122	0	4	HERC5
0	1.41443	0.34	0.048	0	4	IFIT2
0	1.24614	0.519	0.203	0	4	MX2
0	1.10289	0.816	0.561	0	4	EPSTI1
0	1.0989	0.453	0.14	0	4	IFI44
0	1.02051	0.294	0.017	0	4	IFIT3
2.92e-264	0.971279	0.354	0.125	6.45e-260	4	DDX58
6.78e-192	0.776276	0.419	0.196	1.5e-187	4	EIF2AK2
1.07e-182	0.663757	0.331	0.135	2.36e-178	4	STAT1
1.3e-138	0.627373	0.302	0.132	2.86e-134	4	HERC6
2.12e-136	0.628021	0.259	0.105	4.69e-132	4	DDX60
4.1e-132	0.709907	0.588	0.393	9.06e-128	4	PARP14
2.7e-128	0.593162	0.319	0.149	5.96e-124	4	LOC716161
2.31e-127	0.796893	0.544	0.357	5.11e-123	4	RNF213
1.71e-113	0.417109	0.953	0.868	3.78e-109	4	B2M
3.71e-112	0.525582	0.255	0.112	8.2e-108	4	LOC106993361
2.02e-88	0.502604	0.765	0.629	4.45e-84	4	IFI16
8.96e-73	0.43088	0.766	0.652	1.98e-68	4	TRIM22
7.14e-60	0.430998	0.416	0.278	1.58e-55	4	ZC3HAV1
2.74e-52	0.33527	0.921	0.843	6.06e-48	4	C1QB
3.02e-52	0.499036	0.487	0.368	6.68e-48	4	DDX60L
1.92e-50	0.357902	0.383	0.26	4.24e-46	4	ADAR
3.93e-45	0.42325	0.835	0.738	8.68e-41	4	CCL4L1
2.82e-44	0.308184	0.923	0.847	6.24e-40	4	C1QA
4.66e-40	0.273741	0.975	0.942	1.03e-35	4	ZFP36L1
3.69e-38	0.272608	0.958	0.915	8.16e-34	4	SRGN
3.51e-36	0.256879	0.689	0.583	7.76e-32	4	CD74
4.09e-36	0.285387	0.855	0.766	9.03e-32	4	C1QC
1.12e-34	0.288567	0.643	0.552	2.47e-30	4	SP110
1.34e-34	0.323228	0.626	0.527	2.96e-30	4	LOC718454
2.11e-33	0.296497	0.882	0.818	4.66e-29	4	LOC705671
5.5e-31	0.439977	0.435	0.342	1.21e-26	4	SAMD4A
2.2e-28	0.333446	0.493	0.399	4.87e-24	4	PLAC8
9.06e-28	0.407511	0.688	0.612	2e-23	4	FMNL2
2.33e-27	0.309589	0.55	0.456	5.15e-23	4	LOC701504
2.94e-27	0.274472	0.301	0.218	6.49e-23	4	UNC93B1
3.38e-27	0.268784	0.72	0.635	7.47e-23	4	PMAIP1
1.68e-26	0.361947	0.614	0.525	3.71e-22	4	EXT1
1.49e-25	0.261131	0.713	0.617	3.29e-21	4	LOC100430627
1.93e-25	0.372356	0.729	0.659	4.27e-21	4	APOE
4.39e-25	0.298775	0.438	0.352	9.69e-21	4	SAMHD1
1.13e-24	0.256192	0.734	0.65	2.49e-20	4	CST3
1.19e-24	0.271958	0.55	0.47	2.63e-20	4	MKNK1
3.42e-23	0.26402	0.587	0.513	7.56e-19	4	SP100
2.23e-17	0.26138	0.35	0.281	4.92e-13	4	TAGAP
4.18e-17	0.258138	0.661	0.6	9.23e-13	4	PIK3AP1
1.29e-16	0.270323	0.311	0.247	2.84e-12	4	LY75
2.82e-10	0.290555	0.606	0.569	6.24e-06	4	RGL1

## Sheet: Cluster 5
p_val	avg_log2FC	pct.1	pct.2	p_val_adj	cluster	gene
0	4.45103	0.937	0.032	0	5	PLCB1
0	3.73147	0.917	0.032	0	5	DPYD
0	3.32384	0.878	0.492	0	5	TCF7L2
0	3.31291	0.806	0.089	0	5	S100A4
0	3.27822	0.764	0.072	0	5	CD44
0	3.25733	0.911	0.012	0	5	DOCK5
0	3.23676	0.872	0.025	0	5	RIPOR2
0	3.09516	0.888	0.04	0	5	DAPK1
0	3.06977	0.898	0.053	0	5	ITGA4
0	2.92412	0.425	0.021	0	5	VCAN
0	2.90582	0.756	0.021	0	5	IDO1
0	2.8871	0.777	0.077	0	5	S100A6
0	2.64601	0.82	0.071	0	5	TRPS1
0	2.59171	0.827	0.022	0	5	SLCO3A1
0	2.56356	0.617	0.006	0	5	SNTB1
0	2.55756	0.425	0.023	0	5	LOC106996686
0	2.43006	0.751	0.18	0	5	FCGR3
0	2.36483	0.739	0.043	0	5	MEGF9
0	2.27798	0.486	0.044	0	5	CDKN1C
0	2.27602	0.736	0.04	0	5	ANTXR2
0	2.24752	0.81	0.016	0	5	FGR
0	2.23269	0.783	0.068	0	5	ITGAX
0	2.20482	0.578	0.006	0	5	HTR7
0	2.19421	0.964	0.523	0	5	FOXP1
0	2.15732	0.715	0.056	0	5	LTA4H
0	2.15428	0.759	0.181	0	5	MAMU-AG
0	2.13972	0.804	0.131	0	5	PECAM1
0	2.1319	0.724	0.035	0	5	AHNAK
0	2.07036	0.761	0.015	0	5	PILRA
0	2.04693	0.297	0.067	0	5	LOC100499503
0	2.04291	0.848	0.144	0	5	GRK3
0	2.01856	0.915	0.76	0	5	CFD
0	2.01126	0.701	0.004	0	5	IGF2R
0	1.96507	0.341	0.088	0	5	ADORA2B
0	1.94147	0.706	0.039	0	5	SH3BP5
0	1.92419	0.95	0.427	0	5	RNF149
0	1.9185	0.632	0.009	0	5	SASH1
0	1.91103	0.703	0.067	0	5	VIM
0	1.89054	0.923	0.429	0	5	XYLT1
0	1.88589	0.653	0.032	0	5	DUSP5
0	1.8778	0.975	0.868	0	5	B2M
0	1.8753	0.534	0.003	0	5	CDYL2
0	1.84947	0.942	0.557	0	5	RAP1B
0	1.82046	0.555	0.009	0	5	IL15
0	1.81396	0.772	0.052	0	5	IQGAP1
0	1.81046	0.649	0.101	0	5	SOD2
0	1.78342	0.828	0.179	0	5	UTRN
0	1.78099	0.876	0.272	0	5	MAMU-DRB1
0	1.75609	0.7	0.075	0	5	LOC114675357
0	1.74995	0.456	0.024	0	5	CCSER1
0	1.74853	0.287	0.061	0	5	LOC114679371
0	1.7425	0.888	0.361	0	5	MAMU-DRA
0	1.72314	0.7	0.028	0	5	EMILIN2
0	1.72161	0.402	0.004	0	5	EREG
0	1.70652	0.77	0.092	0	5	RIN3
0	1.70617	0.591	0.004	0	5	FRY
0	1.666	0.831	0.355	0	5	OAZ1
0	1.65299	0.764	0.148	0	5	ITGAL
0	1.63555	0.732	0.171	0	5	WARS
0	1.63367	0.775	0.138	0	5	CYTH1
0	1.63307	0.699	0.134	0	5	VCL
0	1.62568	0.816	0.243	0	5	NFKBIZ
0	1.61555	0.29	0.069	0	5	RBPMS
0	1.60344	0.563	0.007	0	5	KMO
0	1.58765	0.583	0.061	0	5	NOCT
0	1.58733	0.641	0.033	0	5	MYOF
0	1.58156	0.578	0.019	0	5	RAB11FIP1
0	1.58097	0.665	0.051	0	5	ANXA2
0	1.57872	0.745	0.15	0	5	LDLRAD3
0	1.56204	0.728	0.097	0	5	TTC7A
0	1.56187	0.772	0.305	0	5	PFN1
0	1.56074	0.613	0.106	0	5	LOC100426197
0	1.55995	0.701	0.081	0	5	CPPED1
0	1.54915	0.897	0.404	0	5	NOTCH2
0	1.5479	0.683	0.177	0	5	RNF24
0	1.54578	0.804	0.287	0	5	PPP1CB
0	1.5405	0.61	0.015	0	5	LSP1
0	1.53905	0.986	0.835	0	5	LYN
0	1.53514	0.769	0.201	0	5	POU2F2
0	1.52466	0.673	0.137	0	5	MAMU-A3
0	1.52026	0.645	0.016	0	5	FLNA
0	1.51843	0.468	0.01	0	5	CHN2
0	1.51666	0.602	0.009	0	5	CFP
0	1.51261	0.547	0.062	0	5	ARHGAP10
0	1.4941	0.66	0.111	0	5	KLF7
0	1.49321	0.689	0.203	0	5	NAMPT
0	1.487	0.41	0.015	0	5	NCAM1
0	1.48426	0.614	0.096	0	5	LOC114669810
0	1.48355	0.851	0.447	0	5	ITGB2
0	1.47613	0.434	0.004	0	5	EIF4E3
0	1.47266	0.649	0.042	0	5	IQSEC1
0	1.47203	0.917	0.473	0	5	FAM49A
0	1.47132	0.697	0.153	0	5	PLXNC1
0	1.46976	1	0.998	0	5	LOC114674534
0	1.46892	0.833	0.241	0	5	LRRFIP1
0	1.46596	0.531	0.009	0	5	MDFIC
0	1.45952	0.551	0.017	0	5	GUCY1B1
0	1.45504	0.634	0.064	0	5	MAMU-DQB1
0	1.45306	0.56	0.029	0	5	RAC2
0	1.44374	0.378	0.052	0	5	GABRG3
0	1.4367	0.653	0.215	0	5	PPM1L
0	1.43482	0.945	0.577	0	5	CD74
0	1.43251	0.527	0.017	0	5	ADGRE2
0	1.42316	0.698	0.129	0	5	PSTPIP2
0	1.41049	0.498	0.01	0	5	SLC38A1
0	1.41031	0.399	0.018	0	5	CPVL
0	1.4079	0.564	0.009	0	5	ATP2B4
0	1.38716	0.547	0.073	0	5	HIVEP2
0	1.38663	0.569	0.06	0	5	CRIP1
0	1.38219	0.606	0.094	0	5	PDE8B
0	1.37625	0.562	0.036	0	5	IQGAP2
0	1.37356	0.867	0.426	0	5	LILRB1
0	1.35668	0.566	0.004	0	5	CCDC88C
0	1.35608	0.717	0.265	0	5	ARHGAP32
0	1.35495	0.638	0.098	0	5	CYTIP
0	1.34742	0.916	0.533	0	5	PIP4K2A
0	1.33484	0.663	0.213	0	5	LST1
0	1.331	0.948	0.688	0	5	CTSS
0	1.33031	1	1	0	5	LOC109910387
0	1.32502	0.611	0.152	0	5	ARID5B
0	1.3247	0.932	0.588	0	5	INPP4A
0	1.31837	0.936	0.625	0	5	SIK3
0	1.3105	0.741	0.196	0	5	CD47
0	1.31023	0.427	0.004	0	5	FLVCR2
0	1.30753	0.717	0.172	0	5	MAFB
0	1.30434	0.91	0.521	0	5	LYST
0	1.30006	0.653	0.055	0	5	SIGLEC11
0	1.28008	0.789	0.289	0	5	RAP1GAP2
0	1.26613	0.586	0.005	0	5	MYO1G
0	1.26408	0.538	0.102	0	5	LOC114677644
0	1.26215	0.529	0.051	0	5	MAMU-DQA1
0	1.26027	0.276	0.053	0	5	LOC106998573
0	1.2581	0.556	0.042	0	5	TNFAIP2
0	1.25489	0.539	0.007	0	5	EHD1
0	1.2544	0.649	0.126	0	5	MAMU-DRB5
0	1.24807	0.988	0.917	0	5	ARHGAP15
0	1.24023	0.835	0.351	0	5	RNF213
0	1.23558	0.561	0.096	0	5	CPD
0	1.23333	0.931	0.549	0	5	TAOK3
0	1.22596	0.489	0.01	0	5	SESTD1
0	1.22018	0.709	0.299	0	5	CD52
0	1.21084	0.297	0.007	0	5	AHR
0	1.19958	0.779	0.299	0	5	SCARB2
0	1.19418	0.392	0.012	0	5	ANKRD33B
0	1.18723	0.504	0.016	0	5	P2RY8
0	1.18673	0.854	0.446	0	5	TLN1
0	1.18332	0.89	0.501	0	5	OSBPL8
0	1.17921	0.421	0.003	0	5	FYN
0	1.17803	0.737	0.288	0	5	PDLIM5
0	1.17361	0.529	0.021	0	5	CD300H
0	1.17191	0.481	0.022	0	5	S100A10
0	1.17076	0.543	0.019	0	5	PLEC
0	1.16072	0.971	0.829	0	5	PSAP
0	1.15728	0.538	0.053	0	5	LRRC25
0	1.15676	0.743	0.253	0	5	ANXA5
0	1.15326	0.838	0.371	0	5	RPS6KC1
0	1.15199	0.467	0.027	0	5	CHST15
0	1.15191	0.811	0.404	0	5	MAP3K1
0	1.15022	0.653	0.178	0	5	STX11
0	1.14333	0.482	0.053	0	5	LOC694538
0	1.13325	0.632	0.12	0	5	ABCC1
0	1.13072	0.511	0.097	0	5	INSIG1
0	1.13067	0.453	0.025	0	5	ADD3
0	1.13059	0.434	0.02	0	5	BCL2A1
0	1.1271	0.679	0.249	0	5	ZDHHC14
0	1.12678	0.488	0.024	0	5	MBOAT1
0	1.12494	0.584	0.177	0	5	RNF144B
0	1.12444	0.976	0.826	0	5	VPS13B
0	1.12258	0.981	0.873	0	5	ZEB2
0	1.11803	0.598	0.123	0	5	TNFSF13B
0	1.10862	0.547	0.084	0	5	BZW2
0	1.10602	0.565	0.131	0	5	HIVEP1
0	1.10417	0.669	0.151	0	5	KLF13
0	1.10381	0.693	0.293	0	5	OXSR1
0	1.10354	0.803	0.288	0	5	CAST
0	1.10353	0.51	0.058	0	5	IRF1
0	1.10079	0.512	0.056	0	5	LGALS3
0	1.09705	0.418	0.008	0	5	SLC24A4
0	1.09032	0.737	0.275	0	5	IFI30
0	1.08539	0.614	0.143	0	5	STK38
0	1.07547	0.746	0.228	0	5	TMOD3
0	1.07538	0.355	0.002	0	5	GALNT3
0	1.07443	0.493	0.131	0	5	ATXN1
0	1.06966	0.44	0.004	0	5	CYFIP2
0	1.06342	0.514	0.075	0	5	LOC114669738
0	1.05958	0.418	0.018	0	5	ADA
0	1.05935	0.597	0.156	0	5	JAZF1
0	1.05777	0.48	0.109	0	5	MT2A
0	1.04518	0.675	0.205	0	5	MBD2
0	1.04101	0.818	0.43	0	5	SOS1
0	1.0361	0.729	0.274	0	5	DMXL2
0	1.03554	0.426	0.081	0	5	CDK14
0	1.03163	0.882	0.518	0	5	RNF13
0	1.031	0.482	0.008	0	5	CCDC69
0	1.02752	0.479	0.064	0	5	NDRG1
0	1.02538	0.468	0.124	0	5	ALCAM
0	1.02405	0.828	0.349	0	5	DIAPH1
0	1.02315	0.86	0.412	0	5	BAZ1A
0	1.02175	0.278	0.032	0	5	LONRF3
0	1.01852	0.69	0.207	0	5	TACC1
0	1.01488	0.563	0.101	0	5	SNX10
0	1.01303	0.882	0.508	0	5	SIPA1L1
0	1.01249	0.375	0.004	0	5	GPR141
0	1.0048	0.608	0.212	0	5	GAB1
0	1.00464	0.579	0.133	0	5	SNX24
0	1.00329	0.695	0.23	0	5	AGTPBP1
0	0.996239	0.803	0.412	0	5	RASGEF1B
0	0.989983	0.342	0.006	0	5	TIMP1
0	0.985634	0.884	0.506	0	5	STK10
0	0.981971	0.772	0.325	0	5	PTP4A2
0	0.977436	0.848	0.485	0	5	USP3
0	0.964932	0.746	0.339	0	5	TANK
0	0.964387	0.595	0.177	0	5	CAT
0	0.962005	0.565	0.124	0	5	EZR
0	0.959057	0.589	0.137	0	5	SIK1
0	0.950664	0.828	0.452	0	5	SMCHD1
0	0.947674	0.532	0.099	0	5	C6H5orf56
0	0.947094	0.449	0.045	0	5	PPM1H
0	0.9463	0.545	0.128	0	5	TMEM170B
0	0.945045	0.551	0.128	0	5	LOC106996627
0	0.943888	0.547	0.087	0	5	SAMD9L
0	0.941903	0.601	0.117	0	5	GLIPR2
0	0.939324	0.579	0.122	0	5	SEPTIN9
0	0.938581	0.61	0.143	0	5	LOC716161
0	0.934489	0.408	0.04	0	5	LOC106997893
0	0.933762	0.382	0.002	0	5	MN1
0	0.932279	0.546	0.133	0	5	CTSA
0	0.929701	0.758	0.329	0	5	NEDD9
0	0.924828	0.775	0.393	0	5	ITGB1
0	0.923436	0.726	0.275	0	5	IL10RB
0	0.923412	0.801	0.399	0	5	H2AFY
0	0.923256	0.593	0.237	0	5	LPL
0	0.919531	0.807	0.425	0	5	CYBB
0	0.917238	0.515	0.117	0	5	LOC719702
0	0.910989	0.398	0.004	0	5	HK3
0	0.910323	0.529	0.123	0	5	CARD16
0	0.908566	0.645	0.184	0	5	ERO1A
0	0.907502	0.861	0.484	0	5	DLG1
0	0.906125	0.662	0.194	0	5	AGO2
0	0.903218	0.282	0.046	0	5	TNIK
0	0.901516	0.595	0.182	0	5	RESF1
0	0.900664	0.689	0.244	0	5	PTPN2
0	0.897174	0.982	0.854	0	5	KEG06-p13
0	0.894797	0.626	0.197	0	5	PTK2B
0	0.884277	0.253	0.002	0	5	CD300E
0	0.884025	0.519	0.112	0	5	RPIA
0	0.878816	0.602	0.19	0	5	HPCAL1
0	0.878102	0.705	0.269	0	5	PSEN1
0	0.87677	0.713	0.277	0	5	PTPN9
0	0.872551	0.847	0.39	0	5	LCP1
0	0.86895	0.737	0.313	0	5	YWHAB
0	0.852815	0.388	0.104	0	5	ABHD17B
0	0.852629	0.989	0.899	0	5	KEG06-p12
0	0.845103	0.834	0.454	0	5	EVI5
0	0.844773	0.39	0.023	0	5	NLRC5
0	0.841405	0.382	0.007	0	5	CD93
0	0.834165	0.394	0.009	0	5	RARA
0	0.831471	0.537	0.116	0	5	ZBTB7A
0	0.830309	0.855	0.502	0	5	ITCH
0	0.829822	0.395	0.017	0	5	DNM1
0	0.829032	0.544	0.169	0	5	ALDH2
0	0.828069	0.743	0.306	0	5	CLINT1
0	0.826653	0.591	0.174	0	5	REV3L
0	0.825555	0.534	0.161	0	5	ESYT2
0	0.821913	0.934	0.606	0	5	STK17B
0	0.818178	0.733	0.341	0	5	FGL2
0	0.816782	0.914	0.619	0	5	ACTR3
0	0.816389	0.397	0.019	0	5	SYNE3
0	0.811268	0.815	0.411	0	5	COTL1
0	0.811106	0.422	0.042	0	5	HIP1
0	0.80764	0.488	0.13	0	5	CSTB
0	0.806565	0.746	0.346	0	5	SAMHD1
0	0.802739	0.563	0.129	0	5	TKT
0	0.796301	0.378	0.034	0	5	PSMB9
0	0.795071	0.47	0.075	0	5	SETD7
0	0.794656	0.329	0.006	0	5	MTSS2
0	0.793899	0.307	0.015	0	5	PRR5L
0	0.792808	0.455	0.063	0	5	LOC100427967
0	0.779166	0.401	0.013	0	5	LFNG
0	0.776794	0.751	0.36	0	5	ARPC1B
0	0.776313	0.383	0.018	0	5	GRK6
0	0.775474	0.632	0.213	0	5	CCPG1
0	0.77041	0.378	0.013	0	5	MEFV
0	0.769744	1	0.998	0	5	KEG06-r01
0	0.769253	0.366	0.041	0	5	EAF2
0	0.768054	0.432	0.12	0	5	TXNRD1
0	0.767824	0.783	0.381	0	5	TPM3
0	0.766808	0.364	0.011	0	5	NUP210
0	0.763475	0.625	0.226	0	5	TBL1X
0	0.76065	0.438	0.073	0	5	MAMU-DPB
0	0.758646	0.641	0.26	0	5	SQSTM1
0	0.753597	0.577	0.153	0	5	ARHGAP30
0	0.751579	0.477	0.11	0	5	PCGF5
0	0.751434	0.837	0.436	0	5	MSN
0	0.748984	0.498	0.092	0	5	C7H15orf39
0	0.748232	0.6	0.205	0	5	USP36
0	0.746665	0.427	0.05	0	5	RELT
0	0.746663	0.499	0.159	0	5	INPP5F
0	0.743954	0.492	0.122	0	5	MAMU-E
0	0.743669	0.623	0.201	0	5	SLC12A6
0	0.743218	0.47	0.133	0	5	CD68
0	0.740165	0.389	0.066	0	5	PGK1
0	0.73482	0.567	0.177	0	5	ZDHHC20
0	0.733915	0.382	0.059	0	5	PRDX5
0	0.733787	0.474	0.156	0	5	PBX3
0	0.732531	0.267	0.005	0	5	BIRC3
0	0.731292	0.494	0.152	0	5	PLBD1
0	0.728519	0.327	0.033	0	5	LY6E-1
0	0.72797	0.524	0.124	0	5	EHBP1L1
0	0.727919	0.477	0.133	0	5	LRRC8B
0	0.726718	0.407	0.061	0	5	RAB27A
0	0.720735	0.398	0.031	0	5	RUNX3
0	0.720536	0.553	0.159	0	5	L3MBTL3
0	0.720507	0.335	0.022	0	5	CLEC2B
0	0.719463	0.533	0.187	0	5	MYL6
0	0.718469	0.685	0.282	0	5	AKNA
0	0.718238	0.36	0.065	0	5	ARHGAP18
0	0.716015	0.385	0.047	0	5	PSMB8
0	0.712193	0.547	0.171	0	5	LPGAT1
0	0.710297	0.615	0.206	0	5	ZNF106
0	0.708809	0.408	0.079	0	5	TMEM140
0	0.707942	0.375	0.034	0	5	FAM110A
0	0.706865	0.34	0.021	0	5	ICAM3
0	0.704721	0.627	0.204	0	5	ZNFX1
0	0.703111	0.417	0.063	0	5	C19H19orf38
0	0.698656	0.267	0.003	0	5	LOC712405
0	0.693997	0.3	0.028	0	5	HBEGF
0	0.693964	0.292	0.019	0	5	SULF2
0	0.69275	0.36	0.091	0	5	LYZ
0	0.690407	0.259	0.006	0	5	AGPAT4
0	0.689294	0.984	0.881	0	5	PTPRC
0	0.684835	0.355	0.014	0	5	METRNL
0	0.683278	0.602	0.208	0	5	SREBF2
0	0.681223	0.476	0.137	0	5	TXNDC16
0	0.679854	0.474	0.104	0	5	ZYX
0	0.67667	0.387	0.077	0	5	IL1RAP
0	0.672711	0.626	0.228	0	5	PTPN6
0	0.67031	0.532	0.154	0	5	TCIRG1
0	0.669624	0.261	0.011	0	5	SLC9A7
0	0.668261	0.339	0.036	0	5	SPN
0	0.66777	0.31	0.003	0	5	LOC715912
0	0.666958	0.565	0.199	0	5	ANO6
0	0.666767	0.278	0.059	0	5	PTPN13
0	0.666094	0.346	0.022	0	5	DEDD2
0	0.66574	0.605	0.235	0	5	DSTN
0	0.663563	0.362	0.053	0	5	NUAK2
0	0.661581	0.44	0.135	0	5	TOB1
0	0.661234	0.435	0.107	0	5	LIMD1
0	0.658038	0.333	0.054	0	5	FUOM
0	0.657946	0.446	0.13	0	5	ATP6V1A
0	0.657746	0.254	0.001	0	5	LOC114677679
0	0.656366	0.419	0.091	0	5	NFIL3
0	0.655159	0.278	0.003	0	5	LILRA5
0	0.65337	0.337	0.037	0	5	NOD2
0	0.653182	0.367	0.065	0	5	IFI27L2
0	0.652057	0.404	0.077	0	5	PSME2
0	0.651227	0.312	0.042	0	5	DRAM1
0	0.650836	0.448	0.119	0	5	ARHGEF18
0	0.648601	0.565	0.194	0	5	MIDN
0	0.648262	0.464	0.091	0	5	NACC2
0	0.647753	0.675	0.271	0	5	LAMP1
0	0.645631	0.432	0.103	0	5	RP2
0	0.644115	0.397	0.101	0	5	MX1
0	0.642475	0.526	0.169	0	5	LOC706568
0	0.642043	0.446	0.133	0	5	STAT1
0	0.640551	0.255	0.005	0	5	CLMN
0	0.640517	0.418	0.1	0	5	CAPG
0	0.637407	0.609	0.231	0	5	VSIR
0	0.633197	0.541	0.167	0	5	EEF2
0	0.633179	0.405	0.073	0	5	CASP12
0	0.631869	0.663	0.266	0	5	EIF3H
0	0.629195	0.286	0.012	0	5	ISG20
0	0.629056	0.472	0.127	0	5	PSME1
0	0.628988	0.274	0.005	0	5	SLC47A1
0	0.627112	0.481	0.116	0	5	CAMKK2
0	0.627041	0.47	0.155	0	5	TNFAIP8
0	0.626121	0.412	0.105	0	5	NUS1
0	0.624967	0.471	0.158	0	5	MYL12B
0	0.62426	0.429	0.088	0	5	CAPN2
0	0.622719	0.304	0.004	0	5	LOC114673980
0	0.617096	0.313	0.024	0	5	KCNAB2
0	0.61047	0.434	0.105	0	5	NBN
0	0.610056	0.493	0.148	0	5	TM9SF4
0	0.609439	0.376	0.078	0	5	SERPINB1
0	0.608918	0.265	0.011	0	5	APOL2
0	0.60864	0.517	0.163	0	5	VASP
0	0.604628	0.333	0.036	0	5	CASP4
0	0.602428	0.568	0.214	0	5	MTPN
0	0.601963	0.274	0.008	0	5	SMPDL3A
0	0.594884	0.37	0.052	0	5	TMEM8A
0	0.588503	0.496	0.164	0	5	ANXA11
0	0.583668	0.313	0.034	0	5	MAMU-DPA
0	0.583458	0.276	0.011	0	5	ALDH1A1
0	0.570485	0.442	0.111	0	5	MVP
0	0.56616	0.387	0.116	0	5	NDUFC2
0	0.563006	0.393	0.082	0	5	TNIP1
0	0.560389	0.412	0.097	0	5	ARHGDIA
0	0.555023	0.263	0.005	0	5	RASGRP2
0	0.549823	0.537	0.186	0	5	EFHD2
0	0.541322	0.254	0.001	0	5	SLC2A6
0	0.540943	0.523	0.181	0	5	ZNF516
0	0.533444	0.635	0.199	0	5	CLEC7A
0	0.533282	0.265	0.018	0	5	GPR65
0	0.53108	0.633	0.243	0	5	CERK
0	0.530778	0.356	0.084	0	5	NT5C3A
0	0.530667	0.276	0.017	0	5	LOC100425941
0	0.528174	0.363	0.063	0	5	GSE1
0	0.523088	0.286	0.05	0	5	ALDH3A2
0	0.521527	0.442	0.128	0	5	ELF4
0	0.52115	0.385	0.088	0	5	KIAA0513
0	0.514703	0.403	0.113	0	5	LDHA
0	0.514424	0.337	0.043	0	5	RXRA
0	0.51324	0.334	0.078	0	5	TENT5A
0	0.510049	0.339	0.077	0	5	MBNL3
0	0.506498	0.338	0.059	0	5	LOC100424348
0	0.504219	0.267	0.03	0	5	APOBR
0	0.494285	0.447	0.14	0	5	INPP5A
0	0.493153	0.405	0.105	0	5	SCIMP
0	0.485032	0.281	0.054	0	5	TXN
0	0.481559	0.338	0.083	0	5	LOC719831
0	0.481435	0.333	0.07	0	5	MAPKAPK3
0	0.479154	0.403	0.111	0	5	SH2B2
0	0.47674	0.267	0.025	0	5	MAP4K2
0	0.47609	0.396	0.112	0	5	ALDOA
0	0.47369	0.251	0.014	0	5	FOSL2
0	0.473525	0.272	0.059	0	5	SLC22A15
0	0.4705	0.269	0.044	0	5	INSR
0	0.468874	0.417	0.127	0	5	TALDO1
0	0.467194	0.326	0.084	0	5	CASP3
0	0.464048	0.426	0.125	0	5	BAZ2A
0	0.46177	0.257	0.043	0	5	LOC114675360
0	0.457332	0.307	0.058	0	5	LGALS3BP
0	0.456982	0.34	0.082	0	5	RALB
0	0.454166	0.304	0.058	0	5	DUSP18
0	0.451946	0.32	0.061	0	5	CDKN1A
0	0.431627	0.277	0.049	0	5	LOC696959
0	0.424149	0.263	0.041	0	5	PLAGL2
0	0.418353	0.253	0.056	0	5	TOMM6
0	0.415934	0.339	0.088	0	5	SLC25A24
0	0.414829	0.327	0.073	0	5	TOM1
0	0.407752	0.291	0.071	0	5	C10H20orf24
0	0.402153	0.278	0.049	0	5	DNPEP
0	0.398658	0.351	0.092	0	5	LACTB
0	0.393359	0.278	0.05	0	5	ACSL5
0	0.3926	0.29	0.062	0	5	ZNF318
0	0.365892	0.252	0.04	0	5	SLC16A3
0	0.347518	0.261	0.059	0	5	CTSD
0	0.333749	0.253	0.05	0	5	CHD3
0	0.328685	0.263	0.056	0	5	LOC708443
4.6e-308	0.343423	0.252	0.056	1.02e-303	5	ZRSR2
1.42e-306	0.628028	0.607	0.239	3.15e-302	5	ATP6V0C
2.19e-306	0.422198	0.261	0.061	4.83e-302	5	GPR155
4.5e-306	0.865034	0.818	0.457	9.94e-302	5	FNBP1
5.23e-305	0.453015	0.386	0.114	1.16e-300	5	SUN2
7.13e-305	0.873466	0.994	0.918	1.58e-300	5	KEG06-p11
6.97e-303	0.45292	0.35	0.098	1.54e-298	5	MAMU-DMB
2.7e-302	0.863457	0.837	0.478	5.97e-298	5	HCK
1.78e-301	0.619582	0.651	0.273	3.94e-297	5	ZC3HAV1
2.35e-301	0.335822	0.317	0.083	5.2e-297	5	CSNK1G2
2.72e-301	0.423062	0.38	0.111	6e-297	5	ERN1
1.37e-299	0.541526	0.485	0.167	3.02e-295	5	SMC6
1.81e-298	0.431859	0.444	0.142	4e-294	5	THEMIS2
2.63e-298	0.492773	0.552	0.202	5.82e-294	5	RASSF5
3.2e-298	0.694203	0.318	0.088	7.07e-294	5	SERPINB9
7.91e-298	0.613376	0.631	0.257	1.75e-293	5	RBM3
1.78e-297	0.866935	0.928	0.657	3.93e-293	5	NCOA3
5.53e-296	0.573104	0.642	0.261	1.22e-291	5	FOXN2
5.44e-295	0.632543	0.582	0.228	1.2e-290	5	RPS4Y1
8.22e-295	0.422596	0.416	0.13	1.82e-290	5	WDR1
3.05e-294	0.406647	0.258	0.061	6.74e-290	5	ENOX2
1.18e-293	0.443643	0.344	0.097	2.6e-289	5	GZF1
1.1e-292	0.707327	0.764	0.371	2.44e-288	5	RAB10
1.54e-292	0.411943	0.405	0.125	3.39e-288	5	SLC12A7
1.33e-291	0.768266	0.806	0.434	2.93e-287	5	MTMR3
3.36e-286	0.421487	0.402	0.125	7.42e-282	5	NUB1
1.24e-285	0.741443	0.382	0.121	2.74e-281	5	IL1B
2.04e-283	0.71447	0.703	0.332	4.51e-279	5	ASAH1
2.54e-283	2.1095	0.606	0.285	5.61e-279	5	BMT2
1.45e-282	0.400097	0.707	0.309	3.21e-278	5	FAM107B
3.37e-282	1.2708	0.845	0.546	7.45e-278	5	FCER1G
1.23e-281	3.29244	0.414	0.157	2.73e-277	5	LOC114673210
6.92e-280	0.652439	0.461	0.165	1.53e-275	5	S100A11
1.04e-279	0.366143	0.257	0.062	2.29e-275	5	TMEM51
5.37e-279	0.488732	0.47	0.164	1.19e-274	5	RAB8B
1.38e-275	0.770569	0.907	0.622	3.04e-271	5	DENND1A
2.02e-275	0.944254	0.715	0.357	4.45e-271	5	CD55
3.72e-275	0.47241	0.502	0.182	8.21e-271	5	VPS36
1.17e-274	0.726234	0.615	0.27	2.58e-270	5	NAV1
1.76e-274	0.392576	0.359	0.108	3.89e-270	5	MTF1
1.97e-274	0.894334	0.957	0.814	4.36e-270	5	PTPRJ
2.14e-273	0.627346	0.571	0.23	4.72e-269	5	LOC695887
2.56e-273	0.670945	0.722	0.346	5.66e-269	5	SEC14L1
3.25e-272	0.30345	0.281	0.072	7.19e-268	5	MAP7D1
1.97e-271	0.596142	0.599	0.243	4.35e-267	5	PPP1R15A
6.56e-271	0.651722	0.718	0.341	1.45e-266	5	IPMK
5.31e-270	0.536734	0.755	0.354	1.17e-265	5	ADGRE5
5.54e-269	1.04302	0.839	0.517	1.22e-264	5	TMSB10
1.01e-268	0.885679	0.684	0.334	2.23e-264	5	SERF2
5.85e-268	0.596658	0.568	0.231	1.29e-263	5	ATG3
9.38e-268	0.349549	0.275	0.071	2.07e-263	5	POLR2L
3.07e-267	0.360054	0.324	0.092	6.79e-263	5	NAPA
2.83e-266	0.582509	0.595	0.244	6.26e-262	5	TMEM131L
5.88e-265	0.427481	0.407	0.134	1.3e-260	5	ATP6V1E1
9.11e-265	0.340053	0.32	0.091	2.01e-260	5	AREL1
6.75e-263	0.361239	0.313	0.088	1.49e-258	5	PPP1CA
7.61e-263	0.892912	0.891	0.617	1.68e-258	5	JAK2
2.25e-262	0.715387	0.743	0.376	4.97e-258	5	FAR1
8.53e-262	0.530743	0.613	0.258	1.88e-257	5	KIDINS220
1.44e-261	0.383605	0.293	0.08	3.18e-257	5	CYSTM1
3.17e-261	0.754754	0.794	0.422	7.01e-257	5	AKT3
6.49e-261	0.553407	0.604	0.249	1.43e-256	5	SGK1
1.97e-260	0.460254	0.279	0.075	4.35e-256	5	LOC714964
1.01e-259	0.657108	0.629	0.277	2.22e-255	5	ARHGDIB
3.28e-258	0.472702	0.43	0.149	7.25e-254	5	GNB2
7.74e-258	0.383534	0.429	0.145	1.71e-253	5	CRLF3
1.42e-257	0.649082	0.744	0.369	3.14e-253	5	ATP9B
1.11e-256	0.380804	0.311	0.089	2.46e-252	5	CASP9
1.58e-256	0.430511	0.382	0.124	3.5e-252	5	BSG
3.54e-255	0.327347	0.293	0.081	7.82e-251	5	IL17RA
4.04e-255	0.395834	0.399	0.132	8.93e-251	5	ARNTL
1.83e-254	0.574298	0.613	0.266	4.05e-250	5	KRAS
1.03e-252	1.04361	0.847	0.571	2.27e-248	5	CALM2
2.08e-252	0.843197	0.622	0.287	4.59e-248	5	RIPK2
1.2e-251	0.289892	0.351	0.107	2.65e-247	5	MOB2
1.22e-250	0.495855	0.579	0.239	2.69e-246	5	BID
4.15e-250	0.554162	0.684	0.316	9.17e-246	5	SYNJ1
8.81e-248	0.320362	0.303	0.087	1.95e-243	5	FLII
4.99e-247	0.824076	0.512	0.205	1.1e-242	5	LIMS1
6.32e-247	0.436994	0.356	0.114	1.4e-242	5	LOC106999943
2.5e-246	0.627405	0.713	0.343	5.53e-242	5	SRI
5.95e-246	0.565185	0.995	0.967	1.31e-241	5	KEG06-p07
7.54e-246	0.465273	0.477	0.177	1.67e-241	5	ATP5MG
1.6e-244	0.361937	0.371	0.121	3.53e-240	5	PNPLA6
4.18e-244	0.59208	0.635	0.286	9.25e-240	5	CSGALNACT2
1.33e-243	0.657839	0.746	0.381	2.94e-239	5	UBE2R2
1.42e-243	0.533743	0.713	0.328	3.14e-239	5	SLC11A1
2.18e-243	0.549734	0.592	0.251	4.82e-239	5	NDEL1
6.54e-239	0.353371	0.333	0.103	1.44e-234	5	ZNF706
6.11e-238	0.349072	0.357	0.114	1.35e-233	5	SLC15A3
8.81e-238	0.496787	0.403	0.141	1.95e-233	5	SNRK
9.4e-238	0.417096	0.294	0.087	2.08e-233	5	PDCD11
9.35e-237	0.580341	0.382	0.134	2.06e-232	5	KLHL6
1.17e-235	0.441391	0.325	0.102	2.59e-231	5	DNASE2
2.88e-235	0.788663	0.899	0.626	6.37e-231	5	FNDC3B
1.34e-233	0.443611	0.432	0.157	2.97e-229	5	SH2D3C
4e-233	0.454466	0.564	0.234	8.84e-229	5	YBX1
2e-231	0.491864	0.562	0.236	4.42e-227	5	RSU1
2.12e-231	0.406924	0.502	0.194	4.69e-227	5	PLEKHB2
6.66e-229	0.369228	0.361	0.119	1.47e-224	5	LMTK2
3.67e-228	0.393006	0.327	0.104	8.11e-224	5	PSMA4
3.87e-228	0.638164	0.786	0.433	8.55e-224	5	RNGTT
2e-227	0.518232	0.445	0.17	4.42e-223	5	MGST3
1.95e-225	0.612354	0.791	0.432	4.32e-221	5	KDM4C
2.64e-225	0.341162	0.32	0.1	5.84e-221	5	SCPEP1
4.37e-224	0.948071	0.811	0.511	9.65e-220	5	KYNU
6.33e-224	0.456535	0.49	0.195	1.4e-219	5	LOC703857
1.04e-223	0.285186	0.287	0.084	2.29e-219	5	MKRN1
1.19e-222	0.41622	0.486	0.19	2.62e-218	5	VDAC2
1.85e-222	0.398298	0.396	0.141	4.09e-218	5	SEC11A
1.29e-221	0.442427	0.551	0.231	2.86e-217	5	SERINC1
2.52e-221	0.395899	0.254	0.071	5.56e-217	5	IL21R
4.54e-220	0.51521	0.693	0.338	1e-215	5	MAPK14
7.02e-220	0.627803	0.676	0.335	1.55e-215	5	RPL4
7.28e-220	0.398599	0.413	0.15	1.61e-215	5	DERL1
1.8e-219	0.70925	0.923	0.703	3.98e-215	5	COP1
1.59e-218	0.545871	0.673	0.327	3.52e-214	5	NT5C2
5.15e-218	0.520285	0.623	0.287	1.14e-213	5	GCC2
9e-218	0.512929	0.529	0.224	1.99e-213	5	AZIN1
2.62e-217	0.334753	0.39	0.136	5.8e-213	5	STAT6
3.11e-217	0.30325	0.278	0.082	6.86e-213	5	CAPNS1
6.32e-217	0.442104	0.507	0.206	1.4e-212	5	PKM
1.16e-216	0.55695	0.742	0.381	2.56e-212	5	LMBRD1
2e-216	0.386941	0.303	0.095	4.41e-212	5	POR
3.11e-216	0.414181	0.52	0.212	6.86e-212	5	UHMK1
6.62e-216	0.680252	0.7	0.37	1.46e-211	5	ASPH
2.45e-215	0.418356	0.536	0.223	5.41e-211	5	MAPKAPK2
1.27e-214	0.694797	0.872	0.562	2.8e-210	5	FBXW7
1.34e-214	0.336664	0.367	0.126	2.97e-210	5	NOTCH1
2.13e-212	0.513362	0.429	0.167	4.71e-208	5	PLD4
9.32e-211	0.719616	0.736	0.403	2.06e-206	5	ACTG1
1.24e-210	0.51949	0.44	0.173	2.75e-206	5	PRKCE
3.05e-210	0.394787	0.462	0.179	6.73e-206	5	CRYBG1
1.04e-209	0.346638	0.368	0.128	2.3e-205	5	STK40
3.01e-209	0.773018	0.703	0.384	6.65e-205	5	RYBP
3.17e-209	0.392008	0.338	0.114	7.01e-205	5	RNASE4
9.16e-209	0.48005	0.625	0.288	2.02e-204	5	CD58
3.69e-208	0.399613	0.529	0.221	8.16e-204	5	ANKRD13A
6.92e-208	0.31717	0.394	0.142	1.53e-203	5	CHMP4B
8.29e-208	0.299318	0.281	0.086	1.83e-203	5	LPIN1
1.14e-207	0.311394	0.321	0.105	2.52e-203	5	IMPAD1
1.58e-207	0.367421	0.429	0.162	3.5e-203	5	AP2A2
5.78e-207	0.354257	0.394	0.143	1.28e-202	5	CCDC12
9.26e-207	0.73866	0.724	0.408	2.05e-202	5	RACK1
9.25e-206	0.309854	0.368	0.128	2.04e-201	5	MTCH2
1.35e-205	0.400172	0.523	0.219	2.99e-201	5	ANXA1
2.45e-205	0.314051	0.345	0.117	5.42e-201	5	MTM1
1.12e-204	0.440298	0.624	0.284	2.47e-200	5	TPR
1.57e-204	0.690161	0.753	0.423	3.48e-200	5	ATP1B3
1.72e-204	0.287493	0.281	0.086	3.8e-200	5	CNIH4
1.79e-204	0.419025	0.48	0.194	3.95e-200	5	AGPAT3
4.43e-204	0.644555	0.719	0.397	9.8e-200	5	PHTF2
6.5e-204	0.386625	0.528	0.221	1.44e-199	5	CLIP1
1.02e-203	0.842518	0.894	0.666	2.25e-199	5	IKZF1
2.23e-203	0.597082	0.787	0.445	4.92e-199	5	COL4A3BP
8.04e-203	0.406851	0.378	0.137	1.78e-198	5	TSPO
9.31e-203	0.415857	0.447	0.175	2.06e-198	5	STK38L
1.5e-202	0.320802	0.351	0.122	3.32e-198	5	ANKRD13D
5.7e-202	0.356957	0.33	0.111	1.26e-197	5	SHLD2
1.58e-200	0.538017	0.648	0.315	3.49e-196	5	SPI1
2.65e-200	0.383864	0.45	0.177	5.85e-196	5	SEMA4A
5.94e-199	0.683963	0.769	0.459	1.31e-194	5	ULK2
2.94e-198	0.660402	0.585	0.274	6.49e-194	5	ELL2
3.81e-197	0.57255	0.718	0.372	8.42e-193	5	PTPRE
7.7e-197	0.368438	0.496	0.205	1.7e-192	5	HK1
8.58e-197	0.282067	0.26	0.078	1.89e-192	5	PSMA5
1.49e-196	0.37656	0.581	0.256	3.3e-192	5	ADAR
3.14e-196	0.464176	0.542	0.241	6.94e-192	5	IFNAR2
3.56e-196	0.290143	0.3	0.097	7.87e-192	5	MAP3K11
1.56e-195	0.626646	0.819	0.494	3.44e-191	5	ASCC3
2.55e-195	0.384577	0.416	0.159	5.63e-191	5	RILPL2
5.43e-195	0.410963	0.389	0.146	1.2e-190	5	LARGE1
7e-194	0.298606	0.269	0.083	1.55e-189	5	NDUFB7
4.27e-193	0.301113	0.252	0.075	9.43e-189	5	PRELID1
6.47e-193	0.488427	0.628	0.3	1.43e-188	5	VMP1
1.15e-192	0.569277	0.915	0.652	2.55e-188	5	PPP1R12A
2.56e-191	0.3861	0.427	0.169	5.65e-187	5	PDCD10
3.32e-191	0.515651	0.687	0.354	7.33e-187	5	ASAP1
4.17e-191	0.411447	0.445	0.181	9.21e-187	5	SELENOS
7.08e-191	0.341216	0.447	0.177	1.56e-186	5	MTMR6
7.8e-191	0.404556	0.595	0.27	1.72e-186	5	WWP2
1.09e-190	0.902049	0.792	0.518	2.4e-186	5	NFAT5
2.03e-190	0.388718	0.405	0.156	4.48e-186	5	NFE2L1
3.42e-190	0.439494	0.396	0.153	7.55e-186	5	ZHX2
6.36e-190	0.413367	0.532	0.234	1.4e-185	5	ARAP1
6.17e-188	0.299693	0.313	0.106	1.36e-183	5	COX16
1.48e-187	0.606236	0.809	0.486	3.27e-183	5	PPP2R5C
1.67e-187	0.273318	0.281	0.089	3.68e-183	5	MKNK2
2.42e-187	0.423064	0.414	0.164	5.36e-183	5	ARMC2
3.91e-187	0.334081	0.268	0.085	8.64e-183	5	GRAMD4
1.74e-186	0.429456	0.372	0.14	3.84e-182	5	CEMIP2
5.96e-186	0.352153	0.469	0.193	1.32e-181	5	GRK2
7.23e-186	0.335052	0.326	0.114	1.6e-181	5	MAMU-DMA
1.82e-185	0.622926	0.678	0.355	4.02e-181	5	ATP5F1E
1.49e-184	0.415145	0.57	0.261	3.29e-180	5	STX12
3.99e-184	0.275749	0.332	0.116	8.82e-180	5	CDKN1B
1.88e-183	0.449372	0.36	0.134	4.16e-179	5	RALA
5.65e-183	0.594584	0.597	0.292	1.25e-178	5	PTPN1
6.85e-183	0.353818	0.446	0.181	1.51e-178	5	ATL3
9.87e-183	0.701536	0.792	0.479	2.18e-178	5	RPL8
1.31e-182	0.40034	0.495	0.214	2.89e-178	5	CD180
9.06e-182	0.371961	0.36	0.134	2e-177	5	ATP5MPL
1.17e-181	0.975086	0.752	0.455	2.59e-177	5	NFKB1
3.5e-181	0.865616	0.735	0.439	7.72e-177	5	AIF1
3.54e-181	0.425526	0.445	0.183	7.82e-177	5	UQCR
9.9e-181	0.429834	0.603	0.289	2.19e-176	5	BANP
3.72e-180	0.505989	0.614	0.301	8.23e-176	5	RASSF3
4.1e-180	0.273181	0.28	0.091	9.06e-176	5	LONRF1
1.7e-179	0.293637	0.255	0.08	3.76e-175	5	ADSS
4.84e-179	0.359002	0.506	0.218	1.07e-174	5	RIOK3
6.39e-179	0.435341	0.608	0.29	1.41e-174	5	SOS2
2.96e-178	0.264436	0.3	0.101	6.54e-174	5	CAMTA2
9.16e-178	0.713122	0.756	0.459	2.02e-173	5	NACA
1.4e-177	0.427529	0.566	0.264	3.1e-173	5	PTTG1IP
1.98e-177	0.619192	0.771	0.46	4.38e-173	5	ATG7
7.81e-177	0.824725	0.76	0.485	1.72e-172	5	EEF1A1
1.57e-176	0.709484	0.984	0.9	3.47e-172	5	KEG06-p08
3.49e-176	0.380904	0.365	0.139	7.7e-172	5	H2AFZ
7.24e-176	0.313626	0.405	0.159	1.6e-171	5	TRIM5
1.41e-175	0.407431	0.459	0.195	3.12e-171	5	ADIPOR2
1.47e-175	0.494881	0.73	0.396	3.25e-171	5	XRN1
3.09e-175	0.353783	0.471	0.197	6.82e-171	5	BCL6
5.93e-175	0.293977	0.371	0.14	1.31e-170	5	ADPGK
3.08e-174	0.434608	0.379	0.15	6.8e-170	5	UBL5
3.85e-174	0.455828	0.764	0.416	8.51e-170	5	KLF4
2.08e-173	0.455403	0.593	0.288	4.58e-169	5	RASA2
6.81e-173	0.43251	0.556	0.259	1.5e-168	5	SH3BGRL3
7.62e-173	0.46908	0.512	0.232	1.68e-168	5	PYCARD
1.75e-172	0.447206	0.575	0.274	3.86e-168	5	SERBP1
5.38e-172	0.438843	0.636	0.317	1.19e-167	5	RTN3
5.43e-172	0.430398	0.568	0.266	1.2e-167	5	EEF1G
7.39e-172	0.301663	0.355	0.133	1.63e-167	5	JOSD1
1.5e-171	0.303254	0.274	0.091	3.32e-167	5	TBX19
2.83e-171	0.326357	0.354	0.133	6.26e-167	5	UBE2J1
3.15e-171	0.401152	0.601	0.291	6.96e-167	5	HBP1
3.96e-171	0.465353	0.631	0.318	8.75e-167	5	PCMTD1
1.41e-170	0.361174	0.432	0.178	3.11e-166	5	PPP2R5A
2.16e-170	0.290715	0.346	0.128	4.78e-166	5	FXYD5
4.17e-170	0.438954	0.46	0.2	9.21e-166	5	BTBD10
4.77e-170	0.506414	0.466	0.207	1.05e-165	5	BCL2L11
6.68e-169	0.470191	0.583	0.283	1.48e-164	5	EMP3
1.33e-168	0.365783	0.279	0.095	2.93e-164	5	B4GALT5
2.09e-168	0.276736	0.287	0.098	4.61e-164	5	ELOB
6.77e-168	0.506724	0.607	0.305	1.49e-163	5	GPD2
5.35e-167	0.525179	0.681	0.365	1.18e-162	5	CFL1
2.41e-166	0.516257	0.68	0.367	5.33e-162	5	CAP1
3.48e-166	0.347793	0.552	0.254	7.68e-162	5	HCLS1
9.81e-166	0.278864	0.323	0.118	2.17e-161	5	FBXL3
2.11e-165	0.336174	0.358	0.138	4.66e-161	5	ITSN1
7.73e-165	0.304697	0.311	0.112	1.71e-160	5	PSMA2
2.22e-164	0.313904	0.463	0.199	4.91e-160	5	BNIP3L
2.39e-164	0.416633	0.647	0.326	5.29e-160	5	AGFG1
1.89e-163	0.339132	0.45	0.193	4.18e-159	5	STIM1
7.05e-163	0.470315	0.788	0.456	1.56e-158	5	CAPZA1
9.57e-163	0.252499	0.304	0.108	2.11e-158	5	EIF2S3
1.13e-162	0.277764	0.267	0.09	2.51e-158	5	PSMA6
1.21e-162	1.0024	0.52	0.272	2.68e-158	5	PDE4B
2.19e-162	0.610555	0.647	0.354	4.83e-158	5	FOXO1
5.34e-162	0.403379	0.675	0.348	1.18e-157	5	DYNC1H1
2.21e-161	0.323848	0.364	0.144	4.89e-157	5	ABHD3
2.24e-161	0.4732	0.639	0.33	4.96e-157	5	XPO6
2.7e-161	0.251888	0.375	0.147	5.96e-157	5	MAP1LC3B
2.96e-161	0.335568	0.457	0.197	6.55e-157	5	DDX24
4.19e-161	0.451123	0.621	0.318	9.26e-157	5	TRAPPC9
4.77e-161	0.268587	0.335	0.125	1.05e-156	5	SASH3
8.14e-161	0.483731	0.698	0.382	1.8e-156	5	NPTN
8.27e-160	0.308891	0.464	0.201	1.83e-155	5	AATF
9.04e-159	0.629654	0.852	0.596	2e-154	5	PIK3AP1
1.15e-158	0.334725	0.447	0.193	2.54e-154	5	PRR13
2.53e-158	0.278948	0.337	0.128	5.59e-154	5	CCT5
3.46e-158	0.360772	0.378	0.154	7.63e-154	5	HEG1
4.45e-158	0.522919	0.895	0.645	9.83e-154	5	DOCK11
2.83e-157	0.293649	0.306	0.111	6.24e-153	5	SERINC5
3.42e-157	0.347225	0.496	0.225	7.56e-153	5	CDK19
1.6e-156	0.798944	0.747	0.463	3.53e-152	5	JARID2
3.35e-156	0.3536	0.465	0.207	7.39e-152	5	RTF1
1.4e-155	0.577429	0.918	0.74	3.09e-151	5	RAPGEF1
1.6e-155	0.291521	0.269	0.093	3.54e-151	5	PCNX4
2.58e-155	0.271061	0.367	0.145	5.69e-151	5	OSTM1
4.67e-155	0.467809	0.596	0.301	1.03e-150	5	RIC1
4.5e-154	0.576307	0.917	0.691	9.95e-150	5	OSBPL11
4.74e-154	0.411246	0.421	0.183	1.05e-149	5	JMY
5.48e-154	0.278102	0.274	0.097	1.21e-149	5	CACYBP
9.47e-154	0.33197	0.456	0.2	2.09e-149	5	LOC718403
2.09e-153	0.331913	0.439	0.19	4.62e-149	5	SERP1
3.06e-153	0.354269	0.514	0.238	6.77e-149	5	ECPAS
7.02e-153	0.543474	0.71	0.415	1.55e-148	5	PITPNC1
1.48e-152	0.399503	0.532	0.254	3.26e-148	5	CORO1A
2.55e-152	0.399259	0.673	0.358	5.64e-148	5	GDI2
3.22e-152	0.361286	0.335	0.131	7.12e-148	5	MYL12A
4.72e-152	0.250086	0.371	0.148	1.04e-147	5	FOXK1
6.8e-152	0.265917	0.351	0.137	1.5e-147	5	PXN
2.14e-151	0.269137	0.332	0.128	4.72e-147	5	WAS
6.97e-151	0.287081	0.339	0.132	1.54e-146	5	MRFAP1
8.6e-151	0.418449	0.51	0.244	1.9e-146	5	PIK3CG
2.4e-150	0.419096	0.706	0.385	5.31e-146	5	TAX1BP1
3.02e-149	0.397687	0.255	0.09	6.68e-145	5	PAM
4.16e-149	0.441786	0.795	0.47	9.19e-145	5	RC3H1
1.91e-148	0.350757	0.408	0.177	4.23e-144	5	GNA15
8.27e-148	0.308093	0.461	0.206	1.83e-143	5	PLEKHM3
1.57e-147	0.284685	0.291	0.107	3.46e-143	5	PDSS1
1.99e-147	0.298954	0.451	0.2	4.4e-143	5	GXYLT1
1.22e-146	0.268915	0.318	0.122	2.7e-142	5	ERGIC2
1.88e-146	0.270037	0.448	0.196	4.16e-142	5	EIF2A
5.8e-146	0.555603	0.89	0.656	1.28e-141	5	RABGAP1L
1.3e-145	0.663684	0.846	0.58	2.86e-141	5	UBC
1.96e-145	0.293148	0.266	0.095	4.33e-141	5	HNMT
2.85e-145	0.373095	0.39	0.166	6.29e-141	5	IFI6
8.21e-145	0.500525	0.674	0.372	1.81e-140	5	GMFG
5.49e-144	0.330722	0.351	0.143	1.21e-139	5	OSBPL3
5.87e-144	0.417955	0.67	0.366	1.3e-139	5	PIKFYVE
1.29e-143	0.497021	0.817	0.536	2.86e-139	5	TET2
4.81e-143	0.291577	0.39	0.164	1.06e-138	5	SEM1
4.96e-143	0.391266	0.651	0.344	1.1e-138	5	NCL
7.65e-143	0.319315	0.317	0.124	1.69e-138	5	LOC114669847
1.3e-142	0.254182	0.277	0.101	2.88e-138	5	NUDT4
1.68e-142	0.459942	0.775	0.468	3.72e-138	5	DYM
9.8e-142	0.382008	0.447	0.206	2.17e-137	5	TBC1D8
1.06e-141	0.292887	0.304	0.117	2.34e-137	5	DHRS7B
3.33e-141	0.287476	0.466	0.211	7.35e-137	5	DBNL
3.34e-141	0.414142	0.81	0.487	7.38e-137	5	MYO1F
1.33e-140	0.262424	0.304	0.116	2.93e-136	5	RAB24
1.71e-140	0.298959	0.546	0.264	3.77e-136	5	GATAD2A
2.7e-140	0.419584	0.583	0.301	5.96e-136	5	UBAP2
3.64e-140	0.299052	0.488	0.226	8.05e-136	5	RAD21
8.28e-140	0.290352	0.408	0.176	1.83e-135	5	SMIM14
1.04e-139	0.275824	0.442	0.197	2.29e-135	5	NAGK
1.64e-139	0.389678	0.43	0.196	3.62e-135	5	KIF13A
3.04e-139	0.255009	0.321	0.126	6.71e-135	5	UBXN1
1.23e-138	0.281852	0.297	0.114	2.71e-134	5	KDM1B
1.53e-138	0.507833	0.594	0.318	3.38e-134	5	RPL7
2.05e-138	0.271717	0.437	0.194	4.53e-134	5	ZMIZ1
2.76e-138	0.279288	0.442	0.198	6.1e-134	5	ANXA7
5.03e-138	0.371983	0.616	0.32	1.11e-133	5	SCFD1
5.81e-138	0.614341	0.953	0.794	1.28e-133	5	MNDA
1.02e-137	0.293643	0.456	0.207	2.25e-133	5	TPP1
1.24e-137	0.276994	0.38	0.16	2.73e-133	5	PSMB1
1.32e-136	0.303453	0.455	0.208	2.92e-132	5	MFSD14A
1.64e-136	0.282055	0.511	0.242	3.62e-132	5	OGDH
2.8e-136	0.260649	0.286	0.109	6.19e-132	5	DBI
8.12e-136	0.283889	0.332	0.134	1.79e-131	5	NDUFB1
1.07e-134	0.38096	0.633	0.337	2.37e-130	5	ARPC5
1.64e-134	0.703855	0.814	0.565	3.61e-130	5	FOXO3
1.84e-134	0.326887	0.486	0.23	4.06e-130	5	CSNK2A1
3.08e-134	0.746238	0.928	0.817	6.8e-130	5	LOC705671
8e-134	0.261399	0.41	0.18	1.77e-129	5	LOC705636
9.04e-134	0.288434	0.287	0.111	2e-129	5	JADE2
1.41e-133	0.257421	0.482	0.223	3.12e-129	5	EIF3L
2.95e-133	0.25084	0.356	0.148	6.52e-129	5	RSL24D1
3.06e-133	0.367632	0.519	0.257	6.77e-129	5	GALNT11
1.23e-132	0.374627	0.679	0.378	2.71e-128	5	STK24
1.38e-132	0.317708	0.56	0.28	3.04e-128	5	DDX21
2.51e-132	0.274967	0.449	0.205	5.55e-128	5	DDHD2
3.32e-132	0.346204	0.335	0.14	7.33e-128	5	GK
9.11e-132	0.336098	0.606	0.314	2.01e-127	5	RALY
2.57e-131	0.295638	0.508	0.244	5.68e-127	5	FERMT3
2.77e-131	0.252273	0.285	0.109	6.11e-127	5	ATP5PF
3.4e-131	0.326394	0.582	0.298	7.52e-127	5	ARL8B
9.01e-131	0.250642	0.377	0.162	1.99e-126	5	CSK
9.28e-131	0.295663	0.317	0.129	2.05e-126	5	COX8A
2.09e-130	0.351429	0.514	0.254	4.62e-126	5	LRRFIP2
3.39e-130	0.39996	0.706	0.41	7.5e-126	5	RCOR1
5.27e-129	0.346266	0.456	0.215	1.16e-124	5	HINT1
1.15e-128	0.288874	0.537	0.263	2.54e-124	5	XRCC6
1.3e-127	0.301977	0.452	0.213	2.87e-123	5	ATR
7.46e-127	0.372751	0.567	0.297	1.65e-122	5	PHACTR4
1.1e-126	0.49237	0.797	0.533	2.43e-122	5	USP32
1.41e-126	0.305905	0.277	0.107	3.11e-122	5	LOC712661
1.65e-126	0.422874	0.742	0.448	3.64e-122	5	SEC31A
3.01e-126	0.387138	0.719	0.42	6.64e-122	5	LNPEP
3.76e-126	0.286312	0.494	0.239	8.32e-122	5	RHEB
4.74e-126	0.258611	0.476	0.224	1.05e-121	5	ARPC4
2.44e-125	0.376085	0.658	0.36	5.39e-121	5	GNS
1.92e-123	0.37012	0.292	0.119	4.25e-119	5	NCF1
2.48e-123	0.268135	0.312	0.129	5.48e-119	5	LOC694887
1.05e-122	0.278982	0.573	0.291	2.33e-118	5	SENP2
4e-122	0.457842	0.704	0.425	8.83e-118	5	MAPRE2
7.04e-122	0.260447	0.328	0.138	1.55e-117	5	SSR2
1.34e-121	0.325457	0.514	0.26	2.97e-117	5	ACTB
2.32e-121	0.350859	0.472	0.233	5.13e-117	5	RNF19A
3.62e-121	0.253082	0.302	0.123	7.99e-117	5	HSBP1
1.83e-119	0.47841	0.733	0.445	4.04e-115	5	REL
1.24e-118	0.287375	0.531	0.268	2.74e-114	5	ARF1
1.38e-118	0.361629	0.724	0.429	3.05e-114	5	AFTPH
2.8e-118	0.330322	0.474	0.232	6.18e-114	5	STK17A
4.65e-118	0.279136	0.613	0.326	1.03e-113	5	CCDC91
5.72e-118	0.54447	0.798	0.539	1.26e-113	5	RPS9
7.25e-118	0.451847	0.762	0.479	1.6e-113	5	SPAG9
1.79e-117	0.279687	0.474	0.233	3.96e-113	5	TBK1
1.82e-117	0.270467	0.473	0.229	4.03e-113	5	PITPNB
3.57e-117	0.447764	0.678	0.405	7.88e-113	5	RPL12
4.36e-117	0.306421	0.65	0.356	9.64e-113	5	TAF3
4.85e-117	0.253169	0.35	0.154	1.07e-112	5	FBXO33
9.9e-117	0.326187	0.748	0.44	2.19e-112	5	EIF3A
1.46e-116	0.251387	0.33	0.142	3.22e-112	5	SNRNP200
2.14e-116	0.477325	0.702	0.425	4.73e-112	5	ARPC3
1.87e-115	0.263703	0.338	0.147	4.14e-111	5	SLC25A5
7.27e-115	0.345234	0.431	0.209	1.61e-110	5	RPL36AL
5.62e-114	0.25735	0.494	0.246	1.24e-109	5	UBR4
2.9e-113	0.263	0.496	0.249	6.4e-109	5	GANC
4.09e-113	0.267936	0.506	0.254	9.04e-109	5	RGL2
6.48e-113	0.39024	0.776	0.495	1.43e-108	5	SHOC2
9.68e-113	0.392665	0.8	0.525	2.14e-108	5	HERC3
1.77e-112	0.413474	0.746	0.469	3.9e-108	5	USP25
3.85e-112	0.275698	0.471	0.232	8.5e-108	5	ABHD2
5.42e-112	0.282056	0.475	0.237	1.2e-107	5	MINDY3
2.79e-111	0.644766	0.921	0.726	6.16e-107	5	KEG06-p06
4.46e-111	0.270372	0.545	0.283	9.86e-107	5	EIF3E
7.36e-111	0.306407	0.629	0.347	1.63e-106	5	TMEM87A
1.2e-110	0.336847	0.482	0.246	2.66e-106	5	ITPK1
5.53e-110	0.254519	0.463	0.229	1.22e-105	5	POLD3
6.95e-110	0.458503	0.867	0.627	1.54e-105	5	IFI16
8.87e-110	0.311254	0.328	0.147	1.96e-105	5	LOC114671323
9.21e-110	0.273097	0.551	0.287	2.04e-105	5	KDM5A
4.43e-109	0.335231	0.605	0.333	9.78e-105	5	GABARAP
1.02e-108	0.430208	0.885	0.645	2.24e-104	5	TNFRSF1B
2.52e-108	0.356599	0.714	0.426	5.57e-104	5	LARP4B
6.76e-108	0.270702	0.375	0.176	1.49e-103	5	PDCD1LG2
1.79e-107	0.355662	0.459	0.235	3.95e-103	5	LOC106998836
2.39e-107	0.291749	0.597	0.327	5.28e-103	5	ESCO1
4.15e-107	0.291776	0.586	0.319	9.16e-103	5	LOC109910386
2.46e-106	0.259266	0.411	0.198	5.44e-102	5	ZUP1
3.04e-105	0.27753	0.574	0.31	6.71e-101	5	IRF2
3.88e-105	0.316554	0.686	0.405	8.58e-101	5	ZFC3H1
2.96e-104	0.373496	0.827	0.556	6.53e-100	5	STAG2
3.05e-104	0.318506	0.364	0.171	6.75e-100	5	TP53BP2
6.65e-104	0.43636	0.58	0.329	1.47e-99	5	SOAT1
6.92e-104	0.478462	0.786	0.53	1.53e-99	5	RPL11
9.55e-104	0.282729	0.603	0.331	2.11e-99	5	RAF1
1.49e-103	0.345597	0.873	0.597	3.3e-99	5	PRRC2C
2.03e-103	0.279026	0.456	0.229	4.48e-99	5	SRP14
3.01e-103	0.278516	0.54	0.287	6.65e-99	5	UBE2G1
7.08e-103	0.364468	0.61	0.348	1.56e-98	5	LOC100427976
1.42e-102	0.527025	0.714	0.461	3.13e-98	5	CEBPB
2.54e-102	0.561384	0.776	0.523	5.6e-98	5	ELOVL5
3.96e-102	0.27824	0.556	0.302	8.74e-98	5	DNAJC1
1.91e-101	0.28164	0.519	0.274	4.22e-97	5	TGOLN2
2.79e-100	0.342108	0.729	0.448	6.16e-96	5	EFR3A
6.37e-100	0.335972	0.67	0.395	1.41e-95	5	GMDS
1.02e-99	0.288419	0.722	0.433	2.24e-95	5	SEPTIN7
2.62e-99	0.334915	0.606	0.341	5.79e-95	5	GRN
1.05e-98	0.308399	0.754	0.465	2.31e-94	5	PAK2
1.3e-98	0.412362	0.504	0.277	2.88e-94	5	MALT1
4.3e-98	0.410426	0.513	0.281	9.5e-94	5	GSTP1
3.07e-97	0.271958	0.638	0.364	6.78e-93	5	FAM13B
2.05e-96	0.479252	0.626	0.383	4.52e-92	5	KLHL24
4.75e-96	0.387944	0.508	0.3	1.05e-91	5	KEG06-p09
4.93e-96	0.454971	0.665	0.418	1.09e-91	5	HSPA8
6.1e-96	0.300626	0.625	0.36	1.35e-91	5	DCP2
8.06e-96	0.405188	0.93	0.769	1.78e-91	5	CTSB
1.14e-95	0.353421	0.654	0.396	2.53e-91	5	HIPK2
5.54e-95	0.363776	0.363	0.18	1.22e-90	5	HRH1
2.24e-94	0.281299	0.467	0.246	4.96e-90	5	TRERF1
3.73e-94	0.399001	0.833	0.59	8.24e-90	5	ERBIN
3.74e-94	0.368288	0.836	0.575	8.25e-90	5	SYK
7.73e-94	0.383606	0.615	0.367	1.71e-89	5	ZFYVE16
1.95e-93	0.379637	0.723	0.456	4.3e-89	5	RPL10A
3.18e-93	0.334859	0.749	0.479	7.01e-89	5	ATXN2
1.17e-92	0.264612	0.429	0.221	2.59e-88	5	GPR137B
2.41e-92	0.291219	0.666	0.393	5.32e-88	5	PPHLN1
5.95e-92	0.379846	0.786	0.534	1.31e-87	5	SH3BGRL
7.49e-90	0.373574	0.869	0.622	1.66e-85	5	ARPC2
2.28e-88	0.263143	0.71	0.43	5.04e-84	5	CUL3
3.23e-88	0.295734	0.726	0.455	7.15e-84	5	MARK3
3.95e-88	0.405866	0.68	0.432	8.72e-84	5	RPS4X
8.32e-88	0.369086	0.913	0.711	1.84e-83	5	MYCBP2
3.72e-86	0.347031	0.819	0.575	8.23e-82	5	CTBP2
6.85e-86	0.262834	0.679	0.402	1.51e-81	5	FMNL1
1.34e-85	0.508158	0.765	0.547	2.96e-81	5	RPS7
5.28e-85	0.254301	0.645	0.385	1.17e-80	5	TULP4
8e-85	0.267552	0.58	0.337	1.77e-80	5	SPOPL
8.64e-85	0.296395	0.732	0.459	1.91e-80	5	GNAI2
7.39e-84	0.456642	0.603	0.374	1.63e-79	5	GTDC1
1.17e-83	0.258295	0.378	0.193	2.58e-79	5	POT1
2.08e-83	0.277287	0.315	0.152	4.61e-79	5	LOC704083
2.89e-83	0.278619	0.799	0.546	6.39e-79	5	HSP90AA1
4.45e-83	0.282386	0.554	0.32	9.84e-79	5	XRCC4
2.59e-81	0.351274	0.866	0.637	5.72e-77	5	FCHO2
2.59e-81	0.296423	0.711	0.46	5.72e-77	5	CNOT6L
4.49e-81	0.300892	0.84	0.589	9.93e-77	5	ROCK1
7.32e-81	0.357619	0.709	0.456	1.62e-76	5	RPL22
2.37e-80	0.32618	0.853	0.618	5.24e-76	5	RAB2A
2.61e-79	0.306628	0.618	0.37	5.76e-75	5	ADAM17
5.74e-78	0.367942	0.827	0.608	1.27e-73	5	ATP2B1
6e-78	0.336469	0.934	0.756	1.32e-73	5	PABPC1
1.44e-77	0.294632	0.744	0.485	3.18e-73	5	SND1
8.2e-77	0.292084	0.885	0.664	1.81e-72	5	ANKRD12
1.21e-76	0.659788	0.674	0.502	2.67e-72	5	BCL2
1.06e-75	0.255585	0.651	0.401	2.34e-71	5	PDIA3
1.11e-75	0.322602	0.911	0.728	2.46e-71	5	MBP
2.48e-75	0.287896	0.68	0.427	5.48e-71	5	RPLP0
2.8e-75	0.509158	0.912	0.859	6.19e-71	5	KEG06-p04
1.27e-74	0.36687	0.677	0.441	2.81e-70	5	RPL7A
2.34e-73	0.285592	0.921	0.737	5.16e-69	5	ACTR2
1.24e-72	0.275559	0.715	0.469	2.74e-68	5	ARHGAP17
2.84e-71	0.358333	0.713	0.472	6.27e-67	5	RPL6
2.76e-70	0.369419	0.813	0.605	6.1e-66	5	PIK3R5
6.84e-70	0.250853	0.818	0.567	1.51e-65	5	UBE2D3
1.68e-69	0.350742	0.683	0.446	3.71e-65	5	CD48
3.15e-69	0.29355	0.656	0.418	6.95e-65	5	LOC703700
4.64e-69	0.267397	0.762	0.52	1.02e-64	5	FRYL
1.23e-68	0.305732	0.821	0.599	2.72e-64	5	NUMB
2.31e-68	0.275949	0.689	0.456	5.09e-64	5	ELF2
2.45e-68	0.267292	0.764	0.52	5.42e-64	5	CAPZA2
5.29e-68	0.411477	0.902	0.778	1.17e-63	5	KLF12
4.77e-67	0.487885	0.89	0.721	1.05e-62	5	ABI1
7.65e-66	0.307191	0.837	0.62	1.69e-61	5	MOB1A
8.16e-65	0.279217	0.96	0.848	1.8e-60	5	KMT2C
1.85e-64	0.407413	0.888	0.708	4.08e-60	5	LPP
6.61e-64	0.303296	0.978	0.926	1.46e-59	5	MBNL1
3.35e-62	0.252802	0.682	0.443	7.4e-58	5	PTMA
6.43e-61	0.421858	0.786	0.587	1.42e-56	5	LOC712274
2.13e-60	0.265622	0.652	0.423	4.71e-56	5	RPS2
5.76e-60	0.254223	0.793	0.563	1.27e-55	5	TRIP12
4.53e-59	0.396884	0.705	0.506	1e-54	5	RPS24
1.08e-57	0.27424	0.768	0.547	2.38e-53	5	FOXJ3
1.23e-57	0.298254	0.567	0.361	2.73e-53	5	ALPK1
8.71e-57	0.292875	0.782	0.573	1.92e-52	5	45352
1.06e-56	0.430398	0.832	0.663	2.33e-52	5	RPL21
3.33e-55	0.30966	0.69	0.485	7.36e-51	5	LOC694064
1.14e-54	0.260031	0.325	0.183	2.51e-50	5	TPK1
4.06e-54	0.305862	0.774	0.554	8.97e-50	5	UBA52
3.79e-52	0.388676	0.849	0.688	8.38e-48	5	RPLP2
1.06e-50	0.52157	0.712	0.513	2.35e-46	5	ATP13A3
1.91e-50	0.269134	0.763	0.55	4.22e-46	5	ADAM10
3.31e-50	0.339617	0.764	0.564	7.32e-46	5	RPS3
1.54e-48	0.419972	0.785	0.62	3.41e-44	5	RPL34
5.59e-48	0.327181	0.606	0.417	1.23e-43	5	RPL37
1.26e-47	0.391001	0.773	0.594	2.79e-43	5	RPL37A-1
1.6e-47	0.350527	0.895	0.757	3.53e-43	5	RPL13
2.23e-45	0.415494	0.878	0.743	4.92e-41	5	RPL23
8.46e-45	0.341743	0.784	0.592	1.87e-40	5	FAU
4.18e-44	0.331341	0.876	0.716	9.24e-40	5	ETV6
9.03e-42	0.315917	0.84	0.658	1.99e-37	5	RPL13A
7.05e-41	0.409952	0.97	0.942	1.56e-36	5	KEG06-r02
8.35e-41	0.292408	0.757	0.572	1.84e-36	5	RPS12
1.31e-40	0.376662	0.762	0.626	2.9e-36	5	PAG1
2.27e-35	0.279099	0.769	0.59	5.01e-31	5	RPL19
4.73e-35	0.28856	0.564	0.456	1.04e-30	5	KEG06-p05
7.46e-34	0.250489	0.878	0.735	1.65e-29	5	SBF2
2.94e-33	0.253211	0.991	0.948	6.49e-29	5	KEG06-p10
1.51e-32	0.362057	0.854	0.72	3.35e-28	5	RPS14
3.15e-27	0.29716	0.926	0.836	6.96e-23	5	RPLP1
3.18e-25	0.282247	0.775	0.632	7.03e-21	5	RPS16
3.37e-25	0.274456	0.831	0.693	7.45e-21	5	RPL10
1.21e-22	0.300242	0.623	0.469	2.68e-18	5	CTSC
5.02e-20	0.273487	0.824	0.699	1.11e-15	5	RPL30
5.58e-20	0.264579	0.809	0.682	1.23e-15	5	RPS23
3.54e-12	0.282582	0.835	0.747	7.82e-08	5	RPS18
0.00235011	0.289029	0.937	0.92	1	5	TMSB4X

## Sheet: Cluster 6
p_val	avg_log2FC	pct.1	pct.2	p_val_adj	cluster	gene
0	3.43892	0.935	0.403	0	6	RBPJ
0	3.39892	0.753	0.01	0	6	COLEC12
0	3.32202	0.793	0.055	0	6	F13A1
0	3.01882	0.86	0.365	0	6	MAMU-DRA
0	2.98665	0.715	0.093	0	6	PSD3
0	2.95753	0.798	0.039	0	6	DPYD
0	2.93423	0.844	0.277	0	6	MAMU-DRB1
0	2.84949	0.777	0.036	0	6	IQGAP2
0	2.81239	0.807	0.076	0	6	TRPS1
0	2.71693	0.93	0.58	0	6	CD74
0	2.35807	0.689	0.128	0	6	MAMU-DRB5
0	2.35798	0.573	0.015	0	6	NCAM1
0	2.35014	0.653	0.048	0	6	CPM
0	2.34146	0.578	0.054	0	6	MAMU-DQA1
0	2.29828	0.444	0.005	0	6	SDC2
0	2.19397	0.669	0.078	0	6	CD44
0	2.19154	0.292	0.018	0	6	FN1
0	2.16326	0.901	0.612	0	6	DAB2
0	2.10209	0.66	0.136	0	6	PID1
0	2.07407	0.632	0.062	0	6	PPM1E
0	2.04069	0.872	0.413	0	6	RASGEF1B
0	2.03463	0.625	0.08	0	6	CDK14
0	2.0058	0.543	0.069	0	6	MAMU-DQB1
0	2.00307	0.635	0.08	0	6	LOC114675357
0	1.97951	0.256	0.024	0	6	GPC5
0	1.90362	0.714	0.134	0	6	SNX24
0	1.89997	0.354	0.021	0	6	CPVL
0	1.89337	0.583	0.073	0	6	MAMU-DPB
0	1.88842	0.365	0.009	0	6	CD36
0	1.8698	0.686	0.154	0	6	ARID5B
0	1.85875	0.681	0.135	0	6	ITSN1
0	1.85862	0.398	0.104	0	6	APOC1
0	1.85153	0.722	0.305	0	6	CD14
0	1.82613	0.6	0.046	0	6	ANTXR2
0	1.80985	0.745	0.13	0	6	ATXN1
0	1.7938	0.534	0.057	0	6	CD163L1
0	1.7471	0.587	0.1	0	6	LOC114669810
0	1.65951	0.76	0.15	0	6	GRK3
0	1.65242	0.378	0.004	0	6	TOX
0	1.65009	0.366	0.008	0	6	ABCA6
0	1.62079	0.553	0.028	0	6	PAPSS2
0	1.59872	0.504	0.021	0	6	RETN
0	1.59192	0.561	0.042	0	6	AHNAK
0	1.57916	0.547	0.071	0	6	ZNF704
0	1.5782	0.512	0.013	0	6	SESTD1
0	1.57636	0.703	0.156	0	6	PLXNC1
0	1.54251	0.59	0.156	0	6	STARD13
0	1.47807	0.426	0.057	0	6	GPR183
0	1.4402	0.32	0.014	0	6	PDGFC
0	1.41612	0.415	0.031	0	6	CHST15
0	1.41281	0.676	0.249	0	6	NFKBIZ
0	1.3993	0.477	0.097	0	6	ABCA1
0	1.38781	0.613	0.159	0	6	MITF
0	1.2882	0.392	0.015	0	6	ADGRG6
0	1.273	0.815	0.425	0	6	MYO5A
0	1.25695	0.371	0.076	0	6	VIM
0	1.24915	0.514	0.052	0	6	DAPK1
0	1.24158	0.29	0.009	0	6	AHR
0	1.24054	0.672	0.202	0	6	CLEC7A
0	1.22477	0.368	0.015	0	6	CREB5
0	1.2011	0.865	0.528	0	6	FOXP1
0	1.19849	0.49	0.087	0	6	PAM
0	1.19158	0.833	0.415	0	6	RTN1
0	1.18898	0.399	0.035	0	6	MAMU-DPA
0	1.1861	0.459	0.092	0	6	LYZ
0	1.17672	0.571	0.111	0	6	MAMU-DMA
0	1.15589	0.282	0.003	0	6	KLHL13
0	1.14123	0.524	0.06	0	6	IQGAP1
0	1.13606	0.437	0.047	0	6	SH3BP5
0	1.11776	0.456	0.048	0	6	PPM1H
0	1.10504	0.373	0.013	0	6	ESR1
0	1.10412	0.5	0.117	0	6	KLF7
0	1.09269	0.447	0.066	0	6	ARHGAP10
0	1.08111	0.272	0.003	0	6	MARCO
0	1.07262	0.277	0.016	0	6	PDE7B
0	1.05575	0.517	0.097	0	6	MAMU-DMB
0	1.0255	0.332	0.058	0	6	LOC694538
0	1.02473	0.552	0.164	0	6	RAB8B
0	1.00829	0.608	0.187	0	6	UTRN
0	1.00246	0.422	0.1	0	6	STXBP6
0	0.986124	0.284	0.046	0	6	P2RY14
0	0.985199	0.317	0.061	0	6	RPS6KA2
0	0.951583	0.331	0.005	0	6	SIGLEC1
0	0.884491	0.316	0.033	0	6	CD5L
0	0.882638	0.388	0.067	0	6	ARHGAP18
0	0.857281	0.331	0.011	0	6	TGFBI
0	0.842568	0.304	0.048	0	6	LDB2
0	0.829863	0.363	0.041	0	6	MYOF
0	0.827174	0.28	0.002	0	6	CHRDL1
0	0.823128	0.256	0.011	0	6	ADAM19
0	0.822896	0.323	0.013	0	6	FCRL5
0	0.811933	0.524	0.146	0	6	CYTH1
0	0.811024	0.294	0.016	0	6	MDFIC
0	0.808547	0.449	0.119	0	6	PTGER4
0	0.795511	0.251	0.009	0	6	FGD6
0	0.784531	0.316	0.053	0	6	CMAH
0	0.768747	0.287	0.022	0	6	LOC697689
0	0.758611	0.254	0.002	0	6	CD200R1
0	0.744026	0.36	0.067	0	6	ITGA4
0	0.724579	0.256	0.017	0	6	IL15
0	0.72422	0.264	0.012	0	6	ALDH1A1
0	0.704152	0.276	0.027	0	6	CLEC1A
0	0.695126	0.271	0.015	0	6	KMO
0	0.690193	0.304	0.039	0	6	EMILIN2
0	0.679821	0.315	0.045	0	6	INSR
0	0.665965	0.266	0.039	0	6	DMD
0	0.658346	0.265	0.012	0	6	TNS1
0	0.593327	0.263	0.027	0	6	PILRA
0	0.59307	0.261	0.025	0	6	CLEC2B
0	0.585637	0.262	0.047	0	6	HIP1
0	0.574426	0.305	0.053	0	6	DHRS3
1.8e-307	1.6076	0.81	0.47	3.97e-303	6	SELENOP
7.61e-297	1.20701	0.436	0.127	1.68e-292	6	ALCAM
6.42e-292	1.11399	0.476	0.148	1.42e-287	6	CADM1
1.13e-287	0.862731	0.53	0.176	2.51e-283	6	PLXND1
1.4e-284	1.23474	0.598	0.219	3.08e-280	6	ANXA1
2.84e-279	0.769179	0.422	0.122	6.28e-275	6	ITGA6
6.64e-279	1.48233	0.737	0.371	1.47e-274	6	NRP1
4.59e-278	0.748471	0.451	0.134	1.01e-273	6	DYNC2H1
6.42e-270	1.28415	0.583	0.233	1.42e-265	6	LYVE1
4.13e-266	0.724635	0.333	0.083	9.12e-262	6	ABCC5
1.82e-265	0.551985	0.28	0.062	4.01e-261	6	GPR155
4.12e-265	1.04208	0.812	0.429	9.11e-261	6	PARP8
4.49e-263	0.739283	0.437	0.131	9.92e-259	6	VSIG4
1.45e-255	0.876683	0.603	0.239	3.2e-251	6	EMB
1.7e-253	0.456971	0.287	0.065	3.76e-249	6	SIGLEC11
7.41e-248	0.808264	0.434	0.137	1.64e-243	6	PSTPIP2
1.85e-247	0.99266	0.426	0.135	4.1e-243	6	TNFAIP3
5.11e-246	0.743212	0.477	0.157	1.13e-241	6	LDLRAD3
7.76e-246	0.615903	0.282	0.066	1.72e-241	6	GSE1
1.35e-229	0.582801	0.361	0.104	2.99e-225	6	TNFRSF11A
2.77e-229	0.572434	0.344	0.095	6.12e-225	6	HNMT
5.97e-229	0.706861	0.299	0.077	1.32e-224	6	CCDC152
1.41e-227	0.656672	0.395	0.121	3.12e-223	6	LOC719702
5.61e-227	0.92712	0.623	0.264	1.24e-222	6	FOXN2
9.28e-225	0.851777	0.323	0.089	2.05e-220	6	S100A6
2.52e-223	0.640588	0.38	0.115	5.56e-219	6	LOC106999943
1.91e-222	0.535141	0.358	0.102	4.23e-218	6	RIN3
3.69e-219	0.967635	0.62	0.276	8.15e-215	6	SLC11A2
5.31e-218	0.630474	0.42	0.137	1.17e-213	6	CTSA
8.72e-218	1.01622	0.699	0.345	1.93e-213	6	TLR2
5.21e-217	0.861684	0.688	0.328	1.15e-212	6	NPC2
1.25e-205	0.479168	0.299	0.08	2.76e-201	6	STARD9
2.53e-203	0.822309	0.617	0.279	5.58e-199	6	DMXL2
1.27e-202	1.1962	0.755	0.468	2.81e-198	6	STAB1
3.74e-196	1.06632	0.529	0.226	8.27e-192	6	FCGR2A
5.55e-196	0.933232	0.391	0.133	1.23e-191	6	PRDM1
1.48e-194	0.561588	0.354	0.11	3.28e-190	6	GOLIM4
4.3e-194	0.88067	0.439	0.164	9.5e-190	6	ARL5B
1.35e-191	0.514304	0.262	0.068	2.98e-187	6	RFTN1
4.45e-191	0.6431	0.48	0.179	9.83e-187	6	MAFB
1.14e-190	0.52061	0.322	0.095	2.52e-186	6	LOC114679405
7.28e-185	0.579901	0.269	0.073	1.61e-180	6	SLC38A6
2.3e-184	0.993972	0.591	0.276	5.09e-180	6	ELL2
4.98e-184	0.852534	0.64	0.315	1.1e-179	6	WWP1
1.56e-179	0.851921	0.758	0.418	3.45e-175	6	KLF4
1.12e-177	0.724527	0.652	0.319	2.48e-173	6	CD84
1.86e-176	0.89129	0.959	0.869	4.11e-172	6	B2M
7.61e-174	1.30936	0.835	0.605	1.68e-169	6	MSR1
4.96e-172	0.919006	0.661	0.343	1.1e-167	6	TANK
3.05e-171	0.714476	0.613	0.29	6.74e-167	6	RASA2
2.56e-170	0.845971	0.6	0.288	5.65e-166	6	CSGALNACT2
9.65e-167	0.578575	0.475	0.189	2.13e-162	6	MAMU-AG
3.13e-163	0.749409	0.727	0.41	6.92e-159	6	NOTCH2
1.55e-160	0.797648	0.682	0.368	3.43e-156	6	SNX9
2.62e-160	0.474885	0.263	0.076	5.78e-156	6	PMP22
1.04e-159	0.635478	0.504	0.213	2.29e-155	6	TACC1
7.55e-159	0.666701	0.608	0.288	1.67e-154	6	MYO9A
1.45e-153	0.705487	0.473	0.199	3.21e-149	6	BCL6
1.9e-153	0.498601	0.272	0.083	4.2e-149	6	TCOF1
4.15e-153	0.774623	0.321	0.11	9.18e-149	6	SOD2
1.42e-150	0.48158	0.299	0.096	3.14e-146	6	TPST1
7.77e-149	0.374448	0.295	0.094	1.72e-144	6	ANGEL1
5.95e-147	0.450357	0.302	0.099	1.31e-142	6	TESK2
5.23e-146	0.719979	0.829	0.546	1.16e-141	6	ATP6V0A1
1.85e-144	0.564509	0.363	0.133	4.09e-140	6	LOC106996627
8.17e-144	0.607664	0.576	0.274	1.8e-139	6	SNX6
1.9e-143	0.719368	0.588	0.29	4.2e-139	6	DERA
2.08e-143	0.742177	0.474	0.208	4.59e-139	6	AGAP1
4.96e-141	0.480606	0.326	0.113	1.1e-136	6	LOC100426197
5.78e-141	0.438994	0.302	0.101	1.28e-136	6	PADI2
1.62e-140	1.48438	0.696	0.458	3.58e-136	6	NFKB1
1.07e-139	0.44722	0.259	0.08	2.36e-135	6	MBNL3
2.64e-139	0.698346	0.649	0.359	5.84e-135	6	CYP27A1
1.57e-138	0.794429	0.785	0.505	3.46e-134	6	OSBPL8
3.25e-138	0.426631	0.284	0.093	7.17e-134	6	MOB3B
1.28e-137	0.475141	0.38	0.144	2.82e-133	6	SRGAP3
4.7e-137	0.661747	0.725	0.428	1.04e-132	6	CYBB
5.08e-133	0.745715	0.69	0.39	1.12e-128	6	PRKN
5.1e-133	1.0998	0.345	0.136	1.13e-128	6	SLC16A10
1.53e-132	0.608295	0.737	0.434	3.38e-128	6	RNF149
5.7e-132	0.633998	0.755	0.46	1.26e-127	6	FNBP1
3.13e-130	0.835797	0.793	0.549	6.91e-126	6	FCER1G
8.47e-130	0.461768	0.373	0.145	1.87e-125	6	MAMU-A3
3.08e-129	0.584634	0.97	0.9	6.8e-125	6	KEG06-p12
1.21e-128	0.378817	0.259	0.083	2.68e-124	6	PLAGL1
7.15e-128	0.7874	0.387	0.161	1.58e-123	6	CXCL8
2.58e-127	0.518594	0.454	0.197	5.7e-123	6	LOC703857
4.56e-127	0.737503	0.967	0.901	1.01e-122	6	KEG06-p08
8.43e-127	0.651329	0.955	0.855	1.86e-122	6	KEG06-p13
1.23e-126	0.400727	0.285	0.096	2.73e-122	6	VWA8
1.58e-126	0.616024	0.82	0.553	3.48e-122	6	TAOK3
3.43e-126	1.10331	0.853	0.657	7.57e-122	6	APOE
5.2e-126	0.932236	0.552	0.29	1.15e-121	6	RIPK2
2.67e-125	0.310505	0.254	0.082	5.89e-121	6	LOC114669738
3.35e-125	0.660829	0.463	0.211	7.4e-121	6	BCAT1
1.07e-124	0.489536	0.542	0.259	2.36e-120	6	ANXA5
8.77e-124	0.643915	0.711	0.419	1.94e-119	6	LOC703700
5.5e-123	0.530938	0.526	0.25	1.22e-118	6	PLD3
1.97e-122	0.591463	0.673	0.373	4.35e-118	6	ATP9B
1.04e-121	0.555945	0.489	0.227	2.3e-117	6	AP1S2
1.28e-121	0.392665	0.318	0.116	2.83e-117	6	ACTR3B
7.29e-121	0.486911	0.344	0.134	1.61e-116	6	ATP6V1A
2.95e-120	0.711352	0.961	0.874	6.51e-116	6	ZEB2
1.08e-119	0.64258	0.616	0.336	2.38e-115	6	ASAH1
1.55e-119	0.367095	0.302	0.109	3.42e-115	6	NBN
1.63e-118	0.414783	0.4	0.166	3.59e-114	6	RUFY3
6.31e-118	0.513941	0.547	0.269	1.39e-113	6	EEF1G
2.21e-117	0.844735	0.525	0.274	4.88e-113	6	PDE4B
9.67e-117	0.979827	0.627	0.361	2.14e-112	6	CD55
2.38e-115	0.519581	1	0.998	5.26e-111	6	KEG06-r01
4.36e-115	0.639893	0.723	0.448	9.63e-111	6	COL4A3BP
1.02e-114	0.636343	0.413	0.182	2.26e-110	6	DTNB
9.15e-114	0.619728	0.788	0.521	2.02e-109	6	RNF13
2.11e-112	0.575173	0.572	0.3	4.65e-108	6	ARL8B
5.95e-111	0.29713	0.25	0.085	1.32e-106	6	TTYH3
2.11e-109	0.628768	0.828	0.578	4.67e-105	6	OSBPL9
7.41e-109	0.516258	0.646	0.362	1.64e-104	6	GNS
4.49e-108	0.639424	0.847	0.578	9.92e-104	6	CD163
2.02e-107	0.489177	0.459	0.216	4.47e-103	6	GARNL3
2.77e-107	0.330658	0.353	0.143	6.12e-103	6	PECAM1
5.96e-107	0.760957	1	0.998	1.32e-102	6	LOC114674534
4.06e-105	0.477677	0.44	0.204	8.96e-101	6	AKIRIN2
2.19e-104	0.568089	0.683	0.399	4.85e-100	6	SDCBP
2.6e-104	0.333858	0.292	0.111	5.75e-100	6	LIMD1
5.53e-104	0.411164	0.373	0.16	1.22e-99	6	HACD4
3.51e-103	0.462549	0.498	0.245	7.76e-99	6	SPATA6
5.53e-103	0.653943	0.438	0.21	1.22e-98	6	NAMPT
1.26e-102	0.382084	0.373	0.158	2.77e-98	6	ARHGEF10L
1.88e-102	0.417745	0.443	0.205	4.15e-98	6	CACUL1
2.89e-102	0.494398	0.536	0.272	6.38e-98	6	LOC106995137
6.79e-102	0.754453	0.866	0.681	1.5e-97	6	TBC1D9
7.33e-102	0.728539	0.835	0.634	1.62e-97	6	PEAK1
1.72e-101	0.557131	0.258	0.096	3.81e-97	6	MAMU-A
2.72e-101	0.365338	0.325	0.132	6.01e-97	6	SEPTIN11
3.08e-101	0.574068	0.73	0.458	6.8e-97	6	EVI5
3.13e-100	0.552594	0.977	0.919	6.92e-96	6	KEG06-p11
7.93e-100	0.532657	0.382	0.173	1.75e-95	6	ITPR1
4.65e-99	0.565016	0.51	0.263	1.03e-94	6	GPX1
1.23e-98	0.430828	0.435	0.203	2.71e-94	6	ANO6
2.83e-98	0.79133	0.847	0.649	6.25e-94	6	CST3
1.78e-97	0.564416	0.787	0.546	3.92e-93	6	EPB41L3
1.96e-97	0.391603	0.365	0.159	4.33e-93	6	TNFAIP8
2.34e-97	0.512525	0.708	0.439	5.16e-93	6	CCDC88A
3.51e-97	0.376718	0.439	0.204	7.76e-93	6	CD47
5.4e-96	0.593062	0.673	0.415	1.19e-91	6	CPQ
1.2e-95	0.530317	0.534	0.28	2.66e-91	6	IL10RB
2.1e-95	0.959469	0.686	0.469	4.63e-91	6	CTSC
2.12e-95	0.82236	0.526	0.295	4.67e-91	6	PTPN1
4.82e-95	0.652386	0.882	0.688	1.06e-90	6	TUT7
8.03e-95	0.355368	0.327	0.137	1.77e-90	6	CD68
1.21e-93	0.377901	0.443	0.211	2.68e-89	6	ATXN7L1
5.01e-93	0.443002	0.58	0.316	1.11e-88	6	C10H20orf194
7.28e-92	0.41327	0.396	0.183	1.61e-87	6	OPHN1
9.72e-91	0.643726	0.66	0.41	2.15e-86	6	NMD3
2.26e-90	0.454523	0.336	0.148	4.99e-86	6	CTDSPL
2.59e-90	0.332201	0.273	0.107	5.72e-86	6	WDR11
3.01e-90	0.548294	0.551	0.303	6.64e-86	6	VMP1
2.18e-89	0.488174	0.6	0.342	4.81e-85	6	GRN
2.89e-89	0.394535	0.292	0.12	6.38e-85	6	NCF1
4.14e-89	0.449021	0.327	0.141	9.15e-85	6	ZBTB10
5.61e-89	0.374693	0.335	0.145	1.24e-84	6	OSBPL3
1.11e-88	0.528428	0.875	0.691	2.45e-84	6	TMCC1
4.17e-88	0.564197	0.832	0.609	9.22e-84	6	ATP2B1
7.79e-88	0.517501	0.623	0.368	1.72e-83	6	ZFYVE16
2.09e-87	0.297734	0.272	0.108	4.62e-83	6	LOC114677644
2.39e-87	0.640335	0.482	0.26	5.28e-83	6	HPGDS
1.04e-86	0.324903	0.258	0.101	2.29e-82	6	LOC114673441
5.94e-86	0.512371	0.665	0.411	1.31e-81	6	RACK1
5.18e-85	0.399297	0.464	0.236	1.14e-80	6	AGTPBP1
6.61e-85	0.371606	0.442	0.217	1.46e-80	6	GAB1
1.52e-84	0.32975	0.437	0.211	3.36e-80	6	ZNF106
2.22e-84	0.460936	0.541	0.296	4.9e-80	6	CAST
3.25e-84	0.709133	0.852	0.701	7.17e-80	6	MRC1
3.77e-84	0.478414	0.482	0.253	8.33e-80	6	CENPC
2.2e-83	0.471103	0.6	0.345	4.86e-79	6	FGL2
2.67e-83	0.393899	0.375	0.176	5.89e-79	6	LPGAT1
1.83e-81	0.522718	0.677	0.427	4.05e-77	6	SNX2
1.96e-81	0.330323	0.318	0.14	4.32e-77	6	TSPO
2.49e-81	0.390081	0.307	0.134	5.5e-77	6	TMEM170B
2.58e-81	0.384646	0.45	0.227	5.7e-77	6	CDK19
1.09e-80	0.507088	0.843	0.629	2.42e-76	6	FNDC3B
1.85e-80	0.359723	0.408	0.198	4.1e-76	6	KIF13A
2.29e-80	0.401284	0.364	0.172	5.06e-76	6	ATG4C
4.48e-80	0.399917	0.476	0.248	9.89e-76	6	TMEM131L
9.67e-80	0.317757	0.424	0.209	2.14e-75	6	TPP1
1.77e-79	0.349742	0.481	0.25	3.91e-75	6	PTPN2
2.02e-79	0.33849	0.458	0.233	4.46e-75	6	RPS4Y1
9.36e-79	0.34372	0.402	0.198	2.07e-74	6	PLEKHB2
4.7e-78	0.392245	0.464	0.244	1.04e-73	6	IFNAR2
9.59e-78	0.536173	0.6	0.363	2.12e-73	6	ARHGAP6
1.08e-77	0.286932	0.403	0.195	2.38e-73	6	IFNAR1
1.93e-77	0.488905	0.574	0.339	4.26e-73	6	C2CD5
2.52e-77	0.43272	0.602	0.349	5.56e-73	6	CARMIL1
3.88e-77	0.459836	0.661	0.417	8.56e-73	6	DISC1
6.23e-77	0.458711	0.379	0.185	1.38e-72	6	STX11
1.12e-76	0.461817	0.901	0.736	2.47e-72	6	ARHGAP26
2.29e-76	0.35652	0.42	0.21	5.07e-72	6	USP36
2.65e-76	0.413042	0.301	0.134	5.86e-72	6	LOC106994778
5.27e-76	0.447422	0.613	0.364	1.16e-71	6	RPL36
9.78e-76	0.493547	0.74	0.498	2.16e-71	6	EXOC6B
1.22e-75	0.522222	0.888	0.744	2.7e-71	6	RPL23
3.09e-75	0.257609	0.305	0.134	6.83e-71	6	SLC44A1
3.92e-74	0.973755	0.735	0.567	8.65e-70	6	RGL1
5.35e-74	0.348013	0.474	0.251	1.18e-69	6	GALK2
1.93e-73	0.431967	0.505	0.282	4.27e-69	6	ACSL1
6.6e-73	0.39961	0.626	0.378	1.46e-68	6	RPS6KC1
1.17e-72	0.526083	0.852	0.689	2.58e-68	6	RPLP2
5.14e-72	0.418203	0.336	0.16	1.14e-67	6	PBX3
7.21e-72	0.615047	0.666	0.445	1.59e-67	6	NFKBIA
9.23e-72	0.478752	0.722	0.486	2.04e-67	6	PRKACB
1.2e-71	0.503614	0.659	0.424	2.66e-67	6	KIF1B
7.67e-70	0.285377	0.372	0.18	1.69e-65	6	EEF2K
1.12e-69	0.376243	0.701	0.452	2.48e-65	6	CD4
1.3e-69	0.34364	0.508	0.281	2.88e-65	6	IFI30
2.21e-69	0.423473	0.649	0.407	4.89e-65	6	RPL12
3.01e-69	0.423372	0.803	0.58	6.65e-65	6	CLASP2
3.08e-69	0.264148	0.294	0.132	6.81e-65	6	HPS1
3.91e-69	0.525258	0.375	0.191	8.65e-65	6	IGF1
5.46e-69	0.389172	0.336	0.163	1.21e-64	6	JAZF1
7.69e-69	0.366083	0.458	0.246	1.7e-64	6	MCU
1.36e-68	0.501436	0.669	0.448	3e-64	6	REL
3.92e-68	0.484713	0.951	0.911	8.65e-64	6	CD83
4.84e-68	0.441733	0.931	0.818	1.07e-63	6	BMP2K
6.19e-68	0.39131	0.553	0.321	1.37e-63	6	RPL7
1.79e-67	0.408754	0.522	0.3	3.95e-63	6	CBLB
2.61e-67	0.453127	0.592	0.368	5.76e-63	6	DUSP6
4.11e-67	0.298906	0.37	0.184	9.08e-63	6	LOC698665
1.07e-66	0.305451	0.34	0.165	2.37e-62	6	LOC699403
1.53e-66	0.255379	0.289	0.131	3.39e-62	6	TNFSF13B
2.91e-66	0.264765	0.368	0.181	6.43e-62	6	NUPR1
1.03e-65	0.524801	0.803	0.621	2.26e-61	6	RPL34
1.32e-65	0.330285	0.38	0.192	2.93e-61	6	NBDY
1.47e-65	0.314701	0.361	0.179	3.26e-61	6	POLA1
1.69e-65	0.470894	0.672	0.442	3.73e-61	6	RPL7A
2.27e-65	0.39334	0.522	0.306	5.02e-61	6	SCARB2
2.99e-65	0.29681	0.456	0.246	6.61e-61	6	RPL14
1.5e-64	0.318709	0.286	0.131	3.32e-60	6	GLCCI1
2.74e-64	0.258874	0.276	0.124	6.04e-60	6	AHI1
2.33e-63	0.447944	0.571	0.345	5.14e-59	6	IPMK
3.39e-63	0.288368	0.279	0.128	7.5e-59	6	TPM4
3.41e-63	0.33175	0.546	0.319	7.54e-59	6	YWHAB
7.59e-63	0.510403	0.899	0.779	1.68e-58	6	RPL27A
9.92e-63	0.473001	0.699	0.483	2.19e-58	6	RPL8
1.01e-62	0.310838	0.405	0.213	2.23e-58	6	EDEM1
1.28e-62	0.393038	0.771	0.546	2.83e-58	6	GAS7
1.3e-62	0.340117	0.542	0.321	2.88e-58	6	SYNJ1
3.76e-62	0.36033	0.549	0.329	8.31e-58	6	DNAJC13
6.53e-62	0.400006	0.469	0.267	1.44e-57	6	BTG1
2.37e-61	0.381571	0.579	0.353	5.24e-57	6	PARD3
3.15e-61	0.388647	0.555	0.332	6.96e-57	6	GNG2
5.76e-61	0.367529	0.986	0.967	1.27e-56	6	KEG06-p07
5.84e-61	0.333399	0.486	0.277	1.29e-56	6	LAMP1
7.26e-61	0.448647	0.645	0.425	1.6e-56	6	RPS2
7.55e-61	0.413212	0.688	0.466	1.67e-56	6	JARID2
1.13e-60	0.426793	0.727	0.514	2.49e-56	6	KYNU
1.41e-60	0.344382	0.565	0.339	3.12e-56	6	RPL4
1.8e-60	0.257255	0.323	0.158	3.97e-56	6	TNFSF4
2.45e-60	0.40984	0.501	0.299	5.42e-56	6	FOLR2
5.35e-60	0.389165	0.688	0.458	1.18e-55	6	RPL22
7e-60	0.333459	0.405	0.217	1.55e-55	6	SLC16A7
7.74e-60	0.273911	0.265	0.121	1.71e-55	6	BLVRB
1.16e-59	0.501585	0.385	0.21	2.56e-55	6	BCL2L11
1.47e-59	0.524087	0.331	0.173	3.24e-55	6	TP53BP2
3.52e-59	0.339323	0.458	0.256	7.77e-55	6	NDEL1
5.58e-59	0.351691	0.368	0.194	1.23e-54	6	SH3PXD2A
6.37e-59	0.27917	0.369	0.189	1.41e-54	6	PKIB
7.93e-59	0.289831	0.384	0.202	1.75e-54	6	EHD4
8.27e-59	0.267505	0.275	0.129	1.83e-54	6	ABCC1
9.71e-59	0.456882	0.772	0.588	2.15e-54	6	LOC712274
2.76e-58	0.306855	0.35	0.18	6.1e-54	6	REV3L
3.01e-58	0.451492	0.901	0.776	6.66e-54	6	RPL41
6.41e-58	0.27412	0.327	0.163	1.42e-53	6	MB21D2
8.7e-58	0.355865	0.446	0.255	1.92e-53	6	ZDHHC14
8.96e-58	0.431208	0.865	0.73	1.98e-53	6	RBM47
9.34e-58	0.274399	0.329	0.166	2.06e-53	6	B3GNT2
2.62e-57	0.530226	0.843	0.694	5.79e-53	6	RPL10
6.64e-57	0.432079	0.825	0.645	1.47e-52	6	RPS21
7.73e-57	0.398243	0.651	0.434	1.71e-52	6	RPS4X
8.05e-57	0.336522	0.288	0.143	1.78e-52	6	MS4A4A
1.13e-56	0.277387	0.344	0.176	2.5e-52	6	PRKCE
5.37e-56	0.596829	0.386	0.22	1.19e-51	6	FAM129A
6.04e-56	0.296593	0.53	0.312	1.33e-51	6	DOCK7
7.4e-56	0.333919	0.416	0.229	1.63e-51	6	LOC697476
7.46e-56	0.280693	0.512	0.301	1.65e-51	6	KEG06-p09
8.59e-56	0.282547	0.369	0.195	1.9e-51	6	LYPLAL1
1e-55	0.291032	0.402	0.217	2.21e-51	6	UNC13B
1.26e-55	0.417566	0.762	0.573	2.79e-51	6	RPS12
1.95e-55	0.271878	0.382	0.203	4.31e-51	6	NDUFA4
1.95e-55	0.289608	0.409	0.224	4.32e-51	6	MBNL2
2.39e-55	0.41398	0.715	0.507	5.29e-51	6	RPS24
5.15e-55	0.270292	0.419	0.229	1.14e-50	6	DGLUCY
6.01e-55	0.611744	0.688	0.515	1.33e-50	6	ATP13A3
7.73e-55	0.325087	0.356	0.188	1.71e-50	6	MOB1B
2.04e-54	0.264042	0.317	0.16	4.52e-50	6	SLC45A4
3.5e-54	0.435299	0.856	0.717	7.73e-50	6	ETV6
8.2e-54	0.367331	0.601	0.382	1.81e-49	6	RPL35
1.45e-53	0.599706	0.29	0.15	3.21e-49	6	NR4A3
1.48e-53	0.316184	0.62	0.397	3.28e-49	6	ITGB1
1.68e-53	0.362973	0.607	0.393	3.72e-49	6	RPS5
1.71e-53	0.429961	0.662	0.459	3.77e-49	6	RPL10A
4.61e-53	0.488667	0.541	0.341	1.02e-48	6	OTUD1
9.08e-53	0.464122	0.877	0.766	2.01e-48	6	TPT1
9.13e-53	0.299438	0.459	0.264	2.02e-48	6	STX12
9.65e-53	0.260593	0.554	0.333	2.13e-48	6	SLC11A1
9.74e-53	0.316143	0.533	0.323	2.15e-48	6	SESN1
1.87e-52	0.431586	0.623	0.43	4.12e-48	6	RPLP0
3.83e-52	0.453136	0.921	0.836	8.46e-48	6	RPLP1
2.61e-51	0.255534	0.266	0.13	5.77e-47	6	NABP1
9.14e-51	0.434324	0.859	0.731	2.02e-46	6	RPS8
9.26e-51	0.257772	0.531	0.316	2.04e-46	6	ATRN
1.16e-50	0.662015	0.804	0.674	2.57e-46	6	DENND4A
1.38e-50	0.303886	0.606	0.388	3.05e-46	6	PIK3C2A
1.6e-50	0.332476	0.568	0.355	3.53e-46	6	EEF1B2
2.85e-50	0.421986	0.664	0.462	6.3e-46	6	ULK2
6.23e-50	0.36437	0.81	0.625	1.38e-45	6	DENND1A
6.85e-50	0.329317	0.533	0.33	1.51e-45	6	AGFG1
8.09e-50	0.401282	0.42	0.248	1.79e-45	6	PPP1R15A
1.07e-49	0.407519	0.723	0.521	2.36e-45	6	TMSB10
1.07e-49	0.403889	0.878	0.735	2.37e-45	6	TGFBR2
1.25e-49	0.27821	0.439	0.25	2.76e-45	6	LRRFIP1
1.49e-49	0.385116	0.746	0.548	3.29e-45	6	RPS7
2.58e-49	0.489816	0.865	0.747	5.71e-45	6	RPS18
2.59e-49	0.448292	0.813	0.666	5.71e-45	6	RPS19
2.68e-49	0.470355	0.837	0.668	5.92e-45	6	MKLN1
4.25e-49	0.381625	0.703	0.5	9.39e-45	6	RPS17
9.93e-49	0.2676	0.256	0.125	2.19e-44	6	TXNRD1
1.13e-48	0.426645	0.763	0.575	2.49e-44	6	MARCH1
1.53e-48	0.327652	0.56	0.358	3.38e-44	6	ASAP1
1.95e-48	0.301742	0.961	0.904	4.31e-44	6	AKAP13
2.1e-48	0.256661	0.362	0.197	4.65e-44	6	HPCAL1
2.86e-48	0.256444	0.39	0.218	6.32e-44	6	STIMATE
3.41e-48	0.410138	0.893	0.773	7.52e-44	6	EPS15
1.05e-47	0.621433	0.74	0.594	2.31e-43	6	OLR1
1.88e-47	0.374609	0.815	0.63	4.16e-43	6	ADK
2.56e-47	0.466772	0.745	0.573	5.65e-43	6	FMN1
5.99e-47	0.414832	0.882	0.758	1.32e-42	6	RPL13
1.41e-46	0.318586	0.255	0.128	3.11e-42	6	SPIRE1
1.6e-46	0.283194	0.28	0.143	3.54e-42	6	CEMIP2
2.02e-46	0.296635	0.512	0.318	4.46e-42	6	GAS6
2.1e-46	0.262573	0.488	0.294	4.65e-42	6	SOS2
2.67e-46	0.394542	0.824	0.651	5.9e-42	6	RPS28
3.16e-46	0.257326	0.271	0.137	6.98e-42	6	PRDX6
5.05e-46	0.298699	0.304	0.162	1.12e-41	6	KIAA0825
5.57e-46	0.29153	0.565	0.362	1.23e-41	6	OAZ1
6.04e-46	0.324632	0.696	0.487	1.34e-41	6	EEF1A1
1.17e-45	0.299178	0.437	0.26	2.58e-41	6	ZNF618
3.86e-45	0.299467	0.368	0.209	8.53e-41	6	LIMS1
7.47e-45	0.294546	0.552	0.35	1.65e-40	6	RPL32
1.86e-44	0.382847	0.977	0.948	4.1e-40	6	KEG06-p10
3.64e-44	0.26916	0.585	0.381	8.04e-40	6	FAR1
5.63e-44	0.397066	0.806	0.653	1.24e-39	6	RPL18
3.12e-43	0.313793	0.574	0.376	6.89e-39	6	DPH6
3.66e-43	0.281932	0.551	0.352	8.09e-39	6	NAP1L1
3.86e-43	0.26015	0.345	0.194	8.53e-39	6	GBE1
6.81e-43	0.271996	0.598	0.393	1.5e-38	6	HEXB
1.14e-42	0.341554	0.903	0.859	2.53e-38	6	KEG06-p04
1.46e-42	0.394155	0.849	0.721	3.22e-38	6	RPS14
1.79e-42	0.321744	0.67	0.475	3.95e-38	6	RPL6
4.61e-42	0.354038	0.73	0.538	1.02e-37	6	RPL28
3.4e-41	0.345086	0.724	0.533	7.52e-37	6	RPL11
7.09e-41	0.288707	0.262	0.137	1.57e-36	6	RALA
1.27e-40	0.314361	0.884	0.762	2.8e-36	6	KLF6
2.03e-40	0.254244	0.539	0.347	4.48e-36	6	CANX
2.75e-40	0.265368	0.657	0.451	6.07e-36	6	CTNNA1
3.81e-40	0.34962	0.739	0.556	8.41e-36	6	UBA52
4.36e-40	0.275796	0.845	0.666	9.63e-36	6	ANKRD12
6.01e-40	0.257229	0.495	0.316	1.33e-35	6	GPHN
6.98e-40	0.335834	0.867	0.728	1.54e-35	6	KEG06-p06
1.17e-39	0.261248	0.355	0.206	2.58e-35	6	CORO1C
1.95e-39	0.283814	0.473	0.295	4.32e-35	6	PDLIM5
3.09e-39	0.469573	0.461	0.296	6.84e-35	6	LOC100426537
5.08e-39	0.281018	0.66	0.462	1.12e-34	6	NACA
6.37e-39	0.277153	0.622	0.422	1.41e-34	6	RPS25
8.45e-39	0.263165	0.397	0.239	1.87e-34	6	PTK2
1.12e-38	0.433494	1	1	2.48e-34	6	LOC109910387
4.45e-38	0.370918	0.714	0.536	9.83e-34	6	RAPH1
4.73e-38	0.36102	0.789	0.638	1.04e-33	6	LOC703455
1.47e-37	0.346245	0.74	0.566	3.25e-33	6	RPS3
1.93e-37	0.257869	0.693	0.49	4.26e-33	6	CLTC
1.97e-37	0.299135	0.508	0.33	4.35e-33	6	NLRP1
2.19e-37	0.349761	0.843	0.699	4.84e-33	6	RPL30
2.29e-37	0.264756	0.397	0.239	5.05e-33	6	NUBPL
1e-36	0.332986	0.497	0.328	2.21e-32	6	SLC18B1
1.9e-36	0.281296	0.749	0.57	4.2e-32	6	UBE2D3
3.46e-36	0.296506	0.425	0.266	7.65e-32	6	SQSTM1
3.49e-36	0.317237	0.646	0.464	7.7e-32	6	ATG7
7.59e-36	0.274137	0.843	0.691	1.68e-31	6	CTSS
1.87e-35	0.341833	0.814	0.66	4.13e-31	6	RPL13A
2.55e-35	0.294565	0.668	0.478	5.63e-31	6	DENND4C
3.53e-35	0.365445	0.706	0.547	7.8e-31	6	RPS15A
7.26e-35	0.272438	0.663	0.469	1.6e-30	6	BCAR3
8.09e-35	0.309157	0.791	0.616	1.79e-30	6	FTH1
1.1e-34	0.3443	0.793	0.633	2.44e-30	6	RPS16
2.8e-34	0.312745	0.92	0.831	6.18e-30	6	PSAP
7.05e-34	0.382613	0.537	0.373	1.56e-29	6	ADAM17
1.62e-33	0.341068	0.838	0.707	3.58e-29	6	RPS29
1.66e-33	0.253458	0.712	0.517	3.66e-29	6	RPSA
2.78e-33	0.352704	0.823	0.683	6.15e-29	6	RPS23
4.88e-33	0.269335	0.966	0.926	1.08e-28	6	MBNL1
6.1e-33	0.321575	0.724	0.558	1.35e-28	6	RPL5
1.24e-32	0.32722	0.756	0.595	2.74e-28	6	RPL37A-1
1.45e-32	0.257696	0.755	0.575	3.19e-28	6	CDKAL1
2.5e-32	0.297973	0.757	0.594	5.53e-28	6	FAU
2.75e-32	0.253027	0.585	0.407	6.07e-28	6	ACTG1
5.05e-32	0.330853	0.874	0.769	1.12e-27	6	RPS27A-1
7.94e-32	0.274655	0.679	0.514	1.75e-27	6	RPL24
1.3e-31	0.275217	0.686	0.512	2.87e-27	6	RPL3
4.21e-31	0.255925	0.846	0.695	9.31e-27	6	BAZ2B
7.45e-31	0.26027	0.725	0.542	1.65e-26	6	RPS9
3.45e-30	0.276846	0.677	0.496	7.63e-26	6	RPL26
4.36e-30	0.283421	0.957	0.942	9.63e-26	6	KEG06-r02
1.26e-29	0.265279	0.64	0.457	2.79e-25	6	SMCHD1
1.63e-29	0.250384	0.624	0.44	3.61e-25	6	LOC703365
1.85e-29	0.377759	0.654	0.499	4.09e-25	6	KLF2
2.11e-29	0.323338	0.87	0.756	4.67e-25	6	RPL38
1.75e-28	0.364722	0.777	0.626	3.87e-24	6	RUNX1
1.84e-28	0.278226	0.811	0.661	4.08e-24	6	RPS15
2.02e-28	0.294662	0.739	0.576	4.47e-24	6	FNDC3A
1.51e-27	0.269126	0.761	0.606	3.33e-23	6	RPS13
1.7e-27	0.354395	0.541	0.404	3.76e-23	6	TOP1MT
1.73e-27	0.254515	0.73	0.559	3.82e-23	6	RPL35A
3.62e-27	0.267463	0.698	0.527	7.99e-23	6	RPL27
3.77e-27	0.282417	0.77	0.624	8.32e-23	6	RPS26
4.42e-26	0.285591	0.789	0.642	9.76e-22	6	RPS11
7.9e-26	0.25927	0.711	0.552	1.74e-21	6	TNS3
9.71e-25	0.292466	0.644	0.49	2.14e-20	6	DENND1B
1.38e-24	0.257052	0.734	0.578	3.04e-20	6	RPL9
1.78e-23	0.443335	0.56	0.422	3.93e-19	6	PLEK
1.92e-23	0.250024	0.439	0.299	4.25e-19	6	OXSR1
2.13e-23	0.277031	0.818	0.687	4.71e-19	6	RPS27
3.86e-23	0.254287	0.796	0.664	8.53e-19	6	RPL21
1.11e-22	0.780932	0.258	0.161	2.46e-18	6	LOC114673210
2.21e-22	0.251032	0.698	0.546	4.88e-18	6	RALGAPA2
6.26e-22	0.268544	0.747	0.596	1.38e-17	6	RPL17
8.35e-22	0.26924	0.762	0.627	1.84e-17	6	TCF4
9e-22	0.279117	0.639	0.492	1.99e-17	6	MAN1C1
1.47e-21	0.252335	0.722	0.584	3.24e-17	6	RPS10
1.57e-21	0.250722	0.781	0.641	3.46e-17	6	RPL23A
1.02e-19	0.2884	0.574	0.44	2.26e-15	6	ZNRF2
1.03e-16	0.41073	0.317	0.224	2.27e-12	6	LOC100426632
8.9e-16	0.491629	0.595	0.532	1.97e-11	6	EDA
8.67e-14	0.331238	0.882	0.848	1.92e-09	6	C1QA

## Sheet: Cluster 7
p_val	avg_log2FC	pct.1	pct.2	p_val_adj	cluster	gene
0	2.34671	0.747	0.231	0	7	POLG2
0	1.97161	0.371	0.015	0	7	GPR87
1.64e-294	1.27497	0.334	0.063	3.63e-290	7	LOC114669793
1.66e-264	1.68305	0.841	0.51	3.67e-260	7	ARRDC3
3.31e-244	1.68545	0.6	0.235	7.32e-240	7	POLR2A
4.91e-219	1.01774	0.295	0.062	1.08e-214	7	LOC114674127
3.82e-216	1.10356	0.977	0.911	8.43e-212	7	CD83
7.46e-215	1.6439	0.68	0.337	1.65e-210	7	LOC114680080
1.36e-212	1.76664	0.558	0.215	3e-208	7	PDK4
3.05e-209	1.86762	0.835	0.588	6.73e-205	7	TEX14
9e-202	1.50137	0.723	0.425	1.99e-197	7	PPP1R10
1.07e-193	1.10178	0.969	0.915	2.36e-189	7	SRGN
1.19e-189	1.20116	0.911	0.758	2.63e-185	7	PABPC1
1.65e-184	1.41666	0.657	0.343	3.64e-180	7	LOC107000013
1.03e-179	1.45915	0.454	0.16	2.28e-175	7	RABEPK
8.16e-171	1.22074	0.513	0.205	1.8e-166	7	LOC106994057
2.3e-159	1.32385	0.562	0.257	5.09e-155	7	ID2
1.22e-147	0.979069	0.354	0.112	2.69e-143	7	LOC114670865
5.48e-145	1.27649	0.443	0.173	1.21e-140	7	UBE2D1
1.7e-141	1.37087	0.725	0.473	3.76e-137	7	MAP3K8
1.65e-139	1.07465	0.874	0.77	3.64e-135	7	CCNL1
1.3e-138	0.821015	0.259	0.068	2.87e-134	7	LOC114674763
3.01e-134	1.03807	0.406	0.154	6.66e-130	7	WDR74
4.84e-127	1.16254	0.414	0.164	1.07e-122	7	LOC114671625
1.06e-125	1.3436	0.655	0.405	2.34e-121	7	SLC38A2
3.93e-125	1.38049	0.735	0.54	8.69e-121	7	MED12L
2.43e-124	1.07542	0.284	0.085	5.37e-120	7	STPG4
2.76e-124	1.09181	0.391	0.15	6.11e-120	7	LOC106998533
2.34e-120	1.04904	0.79	0.614	5.17e-116	7	EIF5
3.04e-120	0.86092	0.902	0.773	6.73e-116	7	LOC704104
6.42e-119	1.00105	0.367	0.139	1.42e-114	7	TOB1
3.35e-116	0.9852	0.88	0.776	7.39e-112	7	DDX3X
1.01e-115	1.10306	0.495	0.232	2.23e-111	7	TNF
2.22e-115	1.36166	0.635	0.407	4.89e-111	7	ARL6IP1
1.54e-114	1.06838	0.789	0.63	3.4e-110	7	SARAF
4.79e-110	1.13376	0.532	0.273	1.06e-105	7	TIPARP
1.34e-108	1.26455	0.553	0.3	2.96e-104	7	IFRD1
4.75e-106	0.999177	0.381	0.158	1.05e-101	7	SYF2
1.79e-105	1.10517	0.502	0.255	3.95e-101	7	ATF3
6.26e-105	0.95074	0.783	0.637	1.38e-100	7	RSRP1
2.2e-103	0.889499	0.882	0.793	4.86e-99	7	CHD2
2.71e-102	1.02656	0.683	0.466	6e-98	7	CALM1
3.57e-100	0.966265	0.733	0.539	7.89e-96	7	SRSF7
4.41e-99	0.705078	0.936	0.868	9.74e-95	7	HNRNPA2B1
7.3e-99	1.06328	0.571	0.344	1.61e-94	7	MAT2A
8.05e-97	1.2367	0.625	0.409	1.78e-92	7	DNAJA1
9.25e-96	1.03579	0.567	0.336	2.04e-91	7	ODC1
1.11e-95	1.19729	0.509	0.28	2.45e-91	7	TAGAP
3.99e-95	1.10375	0.646	0.428	8.82e-91	7	ATP1B3
4.6e-95	1.01957	0.427	0.201	1.02e-90	7	LOC114672574
2.08e-94	0.839604	0.807	0.635	4.59e-90	7	PMAIP1
1.05e-93	0.973788	0.64	0.427	2.31e-89	7	SRSF3
2.45e-93	0.850254	0.879	0.8	5.41e-89	7	ELF1
2.01e-92	0.863431	0.308	0.117	4.44e-88	7	NFE2L3
9.86e-92	1.12538	0.402	0.186	2.18e-87	7	STX11
2.48e-87	0.959986	0.624	0.408	5.48e-83	7	CREM
1.45e-85	0.893624	0.777	0.662	3.2e-81	7	AFF4
2.35e-85	0.573669	0.98	0.941	5.19e-81	7	RGS1
3.56e-83	1.02045	0.472	0.257	7.86e-79	7	DDIT3
3.87e-83	0.825986	0.476	0.249	8.55e-79	7	GADD45B
1.11e-82	0.7867	0.281	0.107	2.45e-78	7	UBE2S
2.72e-82	0.883302	0.715	0.538	6.01e-78	7	ARF4
3.61e-82	0.830737	0.356	0.158	7.98e-78	7	FAM53C
2.08e-81	0.800453	0.316	0.129	4.59e-77	7	LOC107000608
7.2e-81	1.02014	0.627	0.424	1.59e-76	7	SLC25A4
2.93e-80	1.01135	0.561	0.357	6.47e-76	7	PTP4A1
5.45e-80	0.70123	0.838	0.699	1.2e-75	7	BTG2
3.01e-79	0.895543	0.632	0.449	6.65e-75	7	BRD2
9.18e-79	0.863011	0.346	0.155	2.03e-74	7	BEST1
3.3e-77	0.776616	0.268	0.103	7.29e-73	7	LOC106992546
1.1e-76	0.994095	0.414	0.214	2.43e-72	7	LOC106994756
1.49e-76	0.815644	0.764	0.617	3.29e-72	7	LPAR6
1.75e-76	0.848616	0.266	0.102	3.86e-72	7	ACAA2
6.09e-76	0.978845	0.681	0.515	1.35e-71	7	NUFIP2
1.36e-75	0.987979	0.322	0.141	3.01e-71	7	LOC106997853
2.11e-75	0.920215	0.295	0.122	4.67e-71	7	MTO1
5.65e-75	0.903783	0.318	0.138	1.25e-70	7	KLHL15
7.65e-75	1.07638	0.341	0.15	1.69e-70	7	NR4A3
8.15e-74	0.977295	0.637	0.463	1.8e-69	7	GTF2B
1.72e-72	0.73989	0.308	0.133	3.79e-68	7	LOC718486
2.04e-72	0.955758	0.607	0.428	4.5e-68	7	LOC696872
1.57e-71	1.03786	0.48	0.289	3.46e-67	7	RAB5A
3.35e-71	1.03419	0.459	0.265	7.41e-67	7	SLC25A33
3.79e-71	0.683089	0.873	0.79	8.37e-67	7	GPR34
5.82e-71	1.04108	0.384	0.195	1.29e-66	7	TFRC
5.89e-71	0.90187	0.457	0.255	1.3e-66	7	SGK1
1.48e-70	0.918459	0.631	0.453	3.28e-66	7	EIF4G2
2.06e-70	0.983895	0.764	0.682	4.55e-66	7	TOP1
3.4e-70	1.14036	0.699	0.55	7.51e-66	7	HSP90AA1
4.39e-70	0.886314	0.526	0.335	9.69e-66	7	ZFAND5
4.94e-70	0.896559	0.661	0.507	1.09e-65	7	HERPUD1
1.51e-69	0.893452	0.76	0.585	3.34e-65	7	HIST1H2AC
3.27e-69	1.02531	0.775	0.682	7.22e-65	7	LGMN
3.87e-69	0.980756	0.602	0.436	8.55e-65	7	SLC37A2
5.22e-69	0.700879	0.818	0.744	1.15e-64	7	TRA2B
6.16e-69	0.994383	0.535	0.337	1.36e-64	7	JPT1
6.48e-69	1.06462	0.456	0.266	1.43e-64	7	SQSTM1
1.55e-68	1.08596	0.497	0.307	3.43e-64	7	SUCO
6.77e-68	0.882274	0.465	0.268	1.5e-63	7	BTG1
6.07e-67	0.641482	0.865	0.757	1.34e-62	7	ZFP36
1.14e-66	0.641107	0.879	0.8	2.51e-62	7	JUN
4.44e-66	0.896835	0.559	0.383	9.8e-62	7	PCBP2
6.15e-66	0.774746	0.304	0.135	1.36e-61	7	HEXIM1
7.1e-66	0.744873	0.734	0.622	1.57e-61	7	CLK1
8.06e-66	0.918656	0.486	0.298	1.78e-61	7	SKP1
1.77e-65	0.985001	0.402	0.217	3.9e-61	7	GRHL1
4.6e-65	0.913522	0.532	0.34	1.02e-60	7	NR4A2
7.36e-65	0.921806	0.301	0.135	1.63e-60	7	ATP6V1A
2.57e-64	0.834079	0.367	0.182	5.67e-60	7	MAFB
4.23e-64	1.0657	0.625	0.472	9.34e-60	7	HAVCR2
6.72e-64	0.898569	0.444	0.254	1.48e-59	7	NFKBIZ
8.96e-64	0.762564	0.775	0.695	1.98e-59	7	CD53
2.39e-63	0.992089	0.457	0.278	5.29e-59	7	NPM1
4.63e-63	1.02417	0.402	0.224	1.02e-58	7	SPTAN1
1.41e-62	0.862926	0.383	0.204	3.11e-58	7	LOC114671717
6.43e-62	0.752407	0.264	0.112	1.42e-57	7	MXD1
2.95e-61	1.04076	0.542	0.365	6.52e-57	7	G3BP2
4.08e-61	0.792748	0.361	0.184	9.02e-57	7	LOC106994055
6.57e-61	0.98541	0.348	0.179	1.45e-56	7	ABHD5
1.94e-60	0.750876	0.314	0.15	4.28e-56	7	MAP1LC3B
5.1e-60	0.793614	0.76	0.657	1.13e-55	7	CASK
1.85e-59	0.848491	0.291	0.132	4.08e-55	7	PLEKHG2
1.19e-57	0.95311	0.536	0.363	2.62e-53	7	CD55
1.24e-57	0.514547	0.99	0.987	2.73e-53	7	MEF2C
3.76e-57	0.637132	0.251	0.107	8.3e-53	7	CHCHD7
4.18e-57	0.839759	0.306	0.146	9.23e-53	7	OSBPL3
4.44e-57	0.716661	0.317	0.154	9.81e-53	7	LOC114678346
7.04e-57	0.823995	0.694	0.577	1.56e-52	7	TLR4
1.05e-56	0.621089	0.764	0.656	2.32e-52	7	EIF1
2.04e-56	0.721794	0.779	0.669	4.51e-52	7	SAT1
3.41e-56	0.828811	0.49	0.321	7.53e-52	7	PPIA
5.69e-55	0.863428	0.539	0.372	1.26e-50	7	MYLIP
6.12e-55	0.729361	0.604	0.438	1.35e-50	7	GLUL
2.24e-54	1.00995	0.378	0.212	4.95e-50	7	NAMPT
4.29e-54	0.885022	0.598	0.449	9.48e-50	7	REL
5.67e-54	0.907856	0.283	0.135	1.25e-49	7	PREPL
6.96e-54	0.941102	0.664	0.565	1.54e-49	7	DDX3Y
1.02e-53	0.992556	0.556	0.405	2.24e-49	7	PDIA3
3.28e-53	0.843322	0.645	0.512	7.24e-49	7	IVNS1ABP
3.6e-53	0.652207	0.72	0.557	7.96e-49	7	JUNB
6.76e-53	0.700281	0.693	0.576	1.49e-48	7	CALM2
1.12e-52	0.628922	0.816	0.751	2.46e-48	7	C4H6orf62
1.83e-52	0.872104	0.582	0.436	4.04e-48	7	WTAP
7.36e-52	0.761553	0.635	0.503	1.63e-47	7	EIF4A2
1.1e-51	0.494647	0.897	0.856	2.42e-47	7	DDX5
3.32e-51	0.740845	0.71	0.618	7.33e-47	7	HNRNPC
3.29e-50	0.66392	0.275	0.13	7.26e-46	7	NABP1
4.52e-50	0.766298	0.39	0.227	9.98e-46	7	ZNF143
4.97e-50	0.870898	0.62	0.475	1.1e-45	7	INTS6
1.6e-49	0.769413	0.764	0.697	3.53e-45	7	YWHAZ
3.5e-49	0.824244	0.611	0.492	7.74e-45	7	CTNNB1
5.29e-49	0.837416	0.427	0.26	1.17e-44	7	CRY1
5.62e-49	0.779228	0.614	0.457	1.24e-44	7	LOC701504
6.19e-49	0.768106	0.44	0.275	1.37e-44	7	AMD1
9.23e-49	0.665292	0.679	0.557	2.04e-44	7	SKIL
1.02e-47	0.745497	0.565	0.415	2.26e-43	7	MTHFD2
2.12e-47	0.818962	0.259	0.123	4.69e-43	7	ARG2
3.14e-47	0.7083	0.642	0.525	6.94e-43	7	HMGB1
3.75e-47	0.940375	0.514	0.369	8.29e-43	7	VPS26A
7.53e-47	0.700137	0.388	0.229	1.66e-42	7	NFKBID
8.46e-47	0.727026	0.307	0.161	1.87e-42	7	SLC45A4
9.78e-47	0.80156	0.394	0.239	2.16e-42	7	YWHAG
1.32e-46	0.862853	0.661	0.55	2.92e-42	7	CCNH
2.91e-46	0.815032	0.625	0.504	6.43e-42	7	HSPA5
3.43e-46	0.689824	0.272	0.134	7.58e-42	7	LOC106999852
9.27e-46	0.70608	0.432	0.272	2.05e-41	7	MILR1
6.86e-45	0.59329	0.69	0.583	1.52e-40	7	PNRC1
1.86e-44	0.891935	0.539	0.396	4.1e-40	7	RNF19B
2.06e-44	0.956924	0.272	0.14	4.54e-40	7	ZNF280C
4.18e-44	0.74714	0.674	0.572	9.23e-40	7	UBE2D3
6.2e-44	0.738309	0.519	0.374	1.37e-39	7	YPEL5
1.53e-43	0.872799	0.418	0.27	3.38e-39	7	TNFRSF10D
2.74e-43	0.354185	0.969	0.956	6.06e-39	7	LOC106993196
4.66e-42	0.358625	0.967	0.942	1.03e-37	7	ZFP36L1
1.65e-41	0.60978	0.363	0.216	3.65e-37	7	LOC114676311
2.78e-41	0.828343	0.386	0.243	6.15e-37	7	PPP1R2
2.95e-41	0.628604	0.758	0.66	6.51e-37	7	TXNIP
5.27e-41	0.72063	0.657	0.565	1.16e-36	7	PRDM2
7.24e-41	0.74844	0.451	0.297	1.6e-36	7	CD80
7.56e-41	0.850973	0.648	0.553	1.67e-36	7	HSP90AB1
8.35e-41	0.678541	0.484	0.339	1.84e-36	7	XBP1
8.68e-41	0.71564	0.456	0.32	1.92e-36	7	HSPA9
9.82e-41	0.723625	0.418	0.269	2.17e-36	7	HMOX1
1.26e-40	0.634182	0.62	0.478	2.78e-36	7	RGS2
1.53e-40	0.748569	0.338	0.197	3.37e-36	7	PATL1
1.53e-40	0.729868	0.334	0.191	3.38e-36	7	RELL1
1.44e-39	0.605531	0.26	0.132	3.18e-35	7	SPATA1
1.85e-39	0.528747	0.835	0.763	4.08e-35	7	KLF6
7.01e-39	0.918594	0.641	0.536	1.55e-34	7	HSPH1
6.37e-38	0.668205	0.365	0.223	1.41e-33	7	SLC20A1
1.43e-37	0.670251	0.433	0.29	3.16e-33	7	SMAD7
4.56e-37	0.660086	0.49	0.336	1.01e-32	7	NEDD9
4.95e-37	0.790675	0.305	0.174	1.09e-32	7	WDR47
1.63e-36	0.813433	0.45	0.317	3.6e-32	7	DNAJB4
1.65e-36	0.462104	0.806	0.719	3.65e-32	7	FOSB
2.55e-36	0.587546	0.734	0.675	5.63e-32	7	WSB1
3.86e-36	0.487102	0.85	0.8	8.53e-32	7	GNA13
4.52e-36	0.65952	0.751	0.674	9.99e-32	7	TSC22D2
8.74e-36	0.951833	0.597	0.508	1.93e-31	7	ETNK1
1.45e-35	0.686394	0.491	0.367	3.2e-31	7	ETF1
1.53e-35	0.625505	0.53	0.406	3.38e-31	7	LOC699443
2.62e-35	0.769377	0.394	0.258	5.79e-31	7	SMC4
2.63e-35	0.581193	0.63	0.5	5.8e-31	7	KLF2
3.28e-35	0.647599	0.392	0.247	7.25e-31	7	LOC114672064
3.79e-35	0.547899	0.541	0.411	8.38e-31	7	PER1
4.62e-35	0.665778	0.696	0.622	1.02e-30	7	ETS2
5.07e-35	0.628212	0.278	0.153	1.12e-30	7	BCAS2
7.31e-35	0.729265	0.64	0.533	1.62e-30	7	LOC706619
9.58e-35	0.640905	0.406	0.274	2.12e-30	7	CNDP2
9.86e-35	0.561428	0.333	0.198	2.18e-30	7	LOC114677006
1.15e-34	0.587912	0.288	0.162	2.54e-30	7	LOC699110
5.39e-34	0.52093	0.722	0.666	1.19e-29	7	HNRNPH1
1.07e-33	0.692364	0.5	0.381	2.37e-29	7	CD164
9.6e-33	0.597551	0.553	0.443	2.12e-28	7	TAL1
1.27e-32	0.354861	0.905	0.853	2.82e-28	7	DUSP1
1.47e-32	0.565025	0.268	0.15	3.24e-28	7	LOC714818
1.62e-32	0.606631	0.735	0.636	3.58e-28	7	PEAK1
1.69e-32	0.817381	0.746	0.69	3.74e-28	7	TUT7
2.46e-32	0.773041	0.459	0.333	5.42e-28	7	SOAT1
6.81e-32	0.531849	0.71	0.636	1.51e-27	7	TRA2A
7.25e-32	0.606852	0.257	0.141	1.6e-27	7	HIST1H2BJ
1.51e-31	0.583023	0.912	0.875	3.34e-27	7	PELI1
2.6e-31	0.577176	0.265	0.15	5.73e-27	7	LOC696998
5.01e-31	0.604304	0.385	0.259	1.11e-26	7	HIST2H2AC
6.98e-31	0.62589	0.473	0.354	1.54e-26	7	CHORDC1
7.33e-31	0.683945	0.581	0.485	1.62e-26	7	C20H16orf72
1.04e-30	0.587679	0.251	0.139	2.29e-26	7	CTR9
1.74e-30	0.69761	0.446	0.333	3.85e-26	7	PRKAR1A
2.88e-30	0.632962	0.696	0.606	6.37e-26	7	FAM13A
3.66e-30	0.529065	0.669	0.576	8.1e-26	7	RHOB
5.61e-30	0.657234	0.53	0.413	1.24e-25	7	SLC39A10
6.88e-30	0.672963	0.44	0.318	1.52e-25	7	ZNF326
2.41e-29	0.744461	0.468	0.355	5.33e-25	7	NPL
4.69e-29	0.779349	0.368	0.245	1.04e-24	7	TNFSF8
1.35e-28	0.459147	0.303	0.181	2.98e-24	7	DNAJB1
1.72e-28	0.571709	0.739	0.695	3.8e-24	7	HNRNPU
3.86e-28	0.550014	0.581	0.489	8.53e-24	7	FUS
6.84e-28	0.598622	0.784	0.751	1.51e-23	7	RTN4
1.08e-27	0.607608	0.43	0.32	2.38e-23	7	RALY
2.89e-27	0.593607	0.587	0.502	6.38e-23	7	PCF11
3.02e-27	0.767663	0.481	0.387	6.67e-23	7	KLHL24
6.34e-27	0.587599	0.325	0.213	1.4e-22	7	NXF1
8.44e-27	0.494122	0.558	0.447	1.86e-22	7	NFKBIA
8.71e-27	0.580673	0.282	0.172	1.92e-22	7	SYAP1
1.35e-26	0.636417	0.416	0.295	2.98e-22	7	EED
1.43e-26	0.649229	0.387	0.275	3.17e-22	7	NASP
2.89e-26	0.627545	0.38	0.265	6.39e-22	7	SCML1
3.38e-26	0.600948	0.387	0.27	7.46e-22	7	DUSP10
3.38e-26	0.603221	0.29	0.179	7.46e-22	7	FDFT1
4.52e-26	0.517629	0.345	0.228	9.99e-22	7	DDX39A
1.1e-25	0.446723	0.764	0.73	2.43e-21	7	RBM39
1.21e-25	0.546056	0.315	0.206	2.67e-21	7	KANSL2
1.95e-25	0.603264	0.372	0.263	4.31e-21	7	PABPC4
1.99e-25	0.525238	0.584	0.507	4.41e-21	7	SRSF5
2.52e-25	0.627292	0.393	0.287	5.58e-21	7	CASP7
2.56e-25	0.525287	0.347	0.238	5.65e-21	7	MORF4L2
4.13e-25	0.634117	0.421	0.317	9.13e-21	7	RNF138
9.08e-25	0.466136	0.595	0.479	2.01e-20	7	IER2
1.06e-24	0.358294	0.882	0.86	2.34e-20	7	KEG06-p04
1.12e-24	0.580945	0.514	0.422	2.47e-20	7	HSPA8
1.24e-24	0.725986	0.478	0.381	2.74e-20	7	CSNK1G3
1.39e-24	0.496607	0.323	0.212	3.08e-20	7	RNF122
1.47e-24	0.521982	0.468	0.358	3.25e-20	7	EIF4A1
1.5e-24	0.601923	0.434	0.333	3.32e-20	7	UBE2B
1.94e-24	0.656917	0.527	0.43	4.28e-20	7	MAPRE2
3.52e-24	0.658594	0.267	0.165	7.77e-20	7	LOC114675624
1.3e-23	0.515701	0.481	0.379	2.88e-19	7	TUBA1B
3.06e-23	0.540252	0.566	0.493	6.77e-19	7	FUBP1
3.71e-23	0.527217	0.255	0.157	8.19e-19	7	UBE2A
3.87e-23	0.403241	0.687	0.618	8.55e-19	7	FTH1
4.68e-23	0.631162	0.511	0.43	1.03e-18	7	RBMX
1.21e-22	0.571841	0.497	0.402	2.66e-18	7	SDCBP
1.5e-22	0.652755	0.374	0.272	3.32e-18	7	LOC696005
1.92e-22	0.583651	0.451	0.35	4.25e-18	7	SRI
2.24e-22	0.46346	0.682	0.628	4.95e-18	7	SFPQ
2.64e-22	0.599207	0.359	0.253	5.82e-18	7	SLC25A25
2.86e-22	0.494203	0.269	0.172	6.32e-18	7	ZC3H4
3.82e-22	0.567993	0.382	0.277	8.43e-18	7	GALM
3.9e-22	0.505988	0.75	0.705	8.61e-18	7	P2RY13
4.35e-22	0.42532	0.404	0.285	9.61e-18	7	EGR3
4.77e-22	0.659822	0.499	0.417	1.05e-17	7	DNAJB6
5.4e-22	0.477691	0.58	0.498	1.19e-17	7	SLC43A2
9.03e-22	0.585872	0.34	0.239	1.99e-17	7	NCKAP5L
9.15e-22	0.461636	0.536	0.419	2.02e-17	7	RASGEF1B
2.25e-21	0.638043	0.668	0.599	4.96e-17	7	HIF1A
2.93e-21	0.454818	0.267	0.171	6.46e-17	7	CNOT8
3.2e-21	0.658821	0.305	0.208	7.07e-17	7	TMED5
3.62e-21	0.506503	0.319	0.216	8e-17	7	TMEM107
3.96e-21	0.874156	0.416	0.324	8.74e-17	7	LOC109910386
5.14e-21	0.300466	0.979	0.967	1.14e-16	7	KEG06-p07
1.68e-20	0.615776	0.39	0.293	3.7e-16	7	RIPK2
2.23e-20	0.505049	0.463	0.372	4.93e-16	7	HMOX2
2.53e-20	0.519611	0.294	0.196	5.59e-16	7	HSPA14
2.58e-20	0.464742	0.584	0.517	5.7e-16	7	BCLAF1
3.22e-20	0.644078	0.571	0.489	7.12e-16	7	LOC694064
5.65e-20	0.271378	0.965	0.913	1.25e-15	7	P2RY12
6.09e-20	0.450175	0.602	0.523	1.35e-15	7	TMSB10
7.39e-20	0.304104	0.959	0.949	1.63e-15	7	KEG06-p10
1.15e-19	0.681711	0.373	0.281	2.55e-15	7	ZC3HAV1
1.91e-19	0.508609	0.468	0.387	4.22e-15	7	RSRC2
3.37e-19	0.531444	0.498	0.42	7.44e-15	7	CDV3
9.04e-19	0.413941	0.821	0.739	2e-14	7	CCL4L1
9.16e-19	0.544873	0.31	0.221	2.02e-14	7	PHF6
1.52e-18	0.560735	0.449	0.37	3.36e-14	7	RBBP6
1.92e-18	0.591276	0.523	0.45	4.25e-14	7	FBXO34
2.05e-18	0.437228	0.334	0.236	4.54e-14	7	BAIAP2
2.28e-18	0.532295	0.374	0.287	5.04e-14	7	SLC25A3
3.09e-18	0.448971	0.298	0.205	6.82e-14	7	IER3
5.22e-18	0.278052	0.938	0.942	1.15e-13	7	KEG06-r02
7.53e-18	0.483808	0.318	0.227	1.66e-13	7	NOL7
1.23e-17	0.454451	0.401	0.309	2.72e-13	7	GRASP
1.57e-17	0.518926	0.515	0.447	3.46e-13	7	LOC720413
1.78e-17	0.610664	0.455	0.383	3.94e-13	7	EIF2AK3
3.53e-17	0.456251	0.623	0.576	7.81e-13	7	MATR3
6.59e-17	0.391495	0.693	0.618	1.46e-12	7	LOC100430627
7.44e-17	0.637653	0.304	0.221	1.64e-12	7	KDM3A
7.78e-17	0.429663	0.609	0.545	1.72e-12	7	RB1
1.05e-16	0.470405	0.309	0.224	2.33e-12	7	LOC708683
1.1e-16	0.584044	0.261	0.177	2.43e-12	7	PNPLA8
1.11e-16	0.460296	0.442	0.362	2.45e-12	7	SRSF2
1.44e-16	0.431002	0.434	0.343	3.18e-12	7	OTUD1
1.46e-16	0.502429	0.423	0.35	3.22e-12	7	NCL
1.68e-16	0.494986	0.427	0.347	3.72e-12	7	STAT3
1.8e-16	0.507103	0.28	0.198	3.98e-12	7	DNTTIP2
1.86e-16	0.469762	0.333	0.248	4.1e-12	7	PNRC2
2.64e-16	0.695509	0.393	0.323	5.82e-12	7	SECISBP2
2.97e-16	0.273099	0.918	0.902	6.57e-12	7	KEG06-p08
3.12e-16	0.517746	0.507	0.438	6.9e-12	7	SMARCA5
1.89e-15	0.46047	0.409	0.317	4.18e-11	7	FAM107B
2.17e-15	0.374517	0.298	0.21	4.79e-11	7	CITED2
2.41e-15	0.41299	0.342	0.257	5.34e-11	7	GUSBA
2.68e-15	0.640779	0.617	0.595	5.93e-11	7	HSP90B1
2.94e-15	0.440971	0.275	0.193	6.48e-11	7	LOC697721
3.53e-15	0.450062	0.251	0.175	7.8e-11	7	CLASRP
3.59e-15	0.512887	0.267	0.186	7.92e-11	7	ACSL3
4.07e-15	0.489366	0.325	0.247	8.98e-11	7	TLR6
5.64e-15	0.416901	0.331	0.25	1.25e-10	7	PPP1R15A
1.02e-14	0.375205	0.295	0.212	2.26e-10	7	EPM2AIP1
1.29e-14	0.433128	0.697	0.661	2.85e-10	7	RANBP9
1.46e-14	0.456062	0.298	0.218	3.22e-10	7	KBTBD8
1.46e-14	0.417761	0.504	0.422	3.23e-10	7	KLF4
2.1e-14	0.398774	0.454	0.387	4.64e-10	7	IL10RA
2.14e-14	0.518306	0.307	0.23	4.73e-10	7	AZIN1
2.62e-14	0.449848	0.372	0.295	5.79e-10	7	TRANK1
3.13e-14	0.517356	0.656	0.613	6.92e-10	7	STK17B
3.55e-14	0.499377	0.573	0.528	7.84e-10	7	ELOVL5
4.35e-14	0.476157	0.363	0.282	9.62e-10	7	CASS4
4.64e-14	0.730782	0.431	0.374	1.02e-09	7	CPEB2
4.99e-14	0.46969	0.332	0.258	1.1e-09	7	NDEL1
5.7e-14	0.432602	0.35	0.272	1.26e-09	7	WDR91
6.44e-14	0.449233	0.268	0.194	1.42e-09	7	SERP1
6.93e-14	0.445183	0.365	0.293	1.53e-09	7	GLTP
7.46e-14	0.378715	0.509	0.447	1.65e-09	7	PTMA
1.06e-13	0.534668	0.306	0.234	2.34e-09	7	LAP3
1.09e-13	0.579913	0.384	0.32	2.42e-09	7	MEF2D
1.22e-13	0.33837	0.413	0.316	2.69e-09	7	HSPA1A
1.34e-13	0.421536	0.277	0.201	2.95e-09	7	WIPI1
1.49e-13	0.50222	0.293	0.22	3.29e-09	7	LOC106997485
1.76e-13	0.477559	0.321	0.248	3.89e-09	7	HHEX
2.03e-13	0.483683	0.359	0.287	4.48e-09	7	C9orf72
2.31e-13	0.384433	0.551	0.506	5.1e-09	7	LOC694289
2.6e-13	0.473946	0.472	0.414	5.74e-09	7	C3AR1
4.06e-13	0.421144	0.252	0.18	8.96e-09	7	TDG
5.05e-13	0.48569	0.301	0.226	1.12e-08	7	ZNF800
5.69e-13	0.477504	0.406	0.338	1.26e-08	7	KHDRBS1
6.49e-13	0.47994	0.392	0.322	1.43e-08	7	CORO7
8.15e-13	0.432195	0.41	0.349	1.8e-08	7	HNRNPL
9.01e-13	0.414658	0.262	0.19	1.99e-08	7	VPS37B
9.58e-13	0.392705	0.604	0.565	2.12e-08	7	RAP1B
1.01e-12	0.5146	0.299	0.23	2.23e-08	7	FCGR2A
1.02e-12	0.46086	0.348	0.276	2.26e-08	7	TAF1D
1.03e-12	0.590149	0.48	0.43	2.27e-08	7	ERO1B
1.12e-12	0.528313	0.343	0.276	2.48e-08	7	EVI2A
1.13e-12	0.560385	0.487	0.434	2.5e-08	7	MDM2
1.14e-12	0.31976	0.579	0.502	2.52e-08	7	TNFAIP8L3
1.26e-12	0.416949	0.306	0.235	2.78e-08	7	ATP6V0D1
1.42e-12	0.417773	0.497	0.45	3.13e-08	7	NUP98
1.68e-12	0.554626	0.674	0.654	3.72e-08	7	GLS
1.9e-12	0.412004	0.355	0.28	4.19e-08	7	ELL2
2.1e-12	0.473608	0.287	0.219	4.64e-08	7	DLST
2.99e-12	0.588452	0.417	0.357	6.6e-08	7	ST3GAL6
3.1e-12	0.496801	0.298	0.232	6.84e-08	7	VPS4B
3.24e-12	0.344301	0.539	0.49	7.15e-08	7	EEF1A1
4.69e-12	0.390142	0.668	0.636	1.04e-07	7	ETV5
4.96e-12	0.334449	0.79	0.802	1.1e-07	7	ITM2B
4.99e-12	0.449951	0.531	0.478	1.1e-07	7	STOM
5.22e-12	0.374877	0.26	0.191	1.15e-07	7	TMEM243
5.49e-12	0.460371	0.355	0.285	1.21e-07	7	ACSL1
5.5e-12	0.466565	0.312	0.248	1.21e-07	7	SYNCRIP
5.91e-12	0.33784	0.758	0.741	1.31e-07	7	ACTR2
6.98e-12	0.370748	0.5	0.435	1.54e-07	7	UBB
8.29e-12	0.381479	0.511	0.46	1.83e-07	7	KLF3
9.15e-12	0.416087	0.268	0.197	2.02e-07	7	HIST1H2BK
9.25e-12	0.4366	0.578	0.535	2.04e-07	7	PI4K2A
9.36e-12	0.425682	0.444	0.39	2.07e-07	7	RYBP
9.44e-12	0.258718	0.82	0.801	2.08e-07	7	YWHAH
9.52e-12	0.393738	0.321	0.247	2.1e-07	7	LOC106998842
1.14e-11	0.334347	0.565	0.506	2.51e-07	7	MCL1
1.19e-11	0.300101	0.329	0.252	2.62e-07	7	ZSWIM4
1.34e-11	0.354667	0.5	0.444	2.96e-07	7	CEBPD
1.63e-11	0.396921	0.286	0.22	3.59e-07	7	MAPK1IP1L
1.74e-11	0.449314	0.686	0.676	3.85e-07	7	DENND4A
2.49e-11	0.424607	0.423	0.368	5.5e-07	7	SCAF4
2.71e-11	0.369589	0.539	0.505	5.98e-07	7	HNRNPK
2.95e-11	0.348144	0.273	0.202	6.51e-07	7	BCL6
3.82e-11	0.346902	0.272	0.203	8.43e-07	7	LOC107000817
4.85e-11	0.399612	0.309	0.247	1.07e-06	7	SAFB2
4.95e-11	0.493131	0.406	0.355	1.09e-06	7	NAP1L1
6.36e-11	0.466631	0.333	0.27	1.41e-06	7	P2RX4
6.57e-11	0.412661	0.485	0.426	1.45e-06	7	SLC7A8
7.13e-11	0.417599	0.669	0.634	1.57e-06	7	RIN2
1.61e-10	0.31485	0.284	0.215	3.55e-06	7	SSPN
2.18e-10	0.337188	0.755	0.729	4.82e-06	7	KEG06-p06
2.48e-10	0.387724	0.255	0.192	5.47e-06	7	CCNK
2.55e-10	0.331855	0.834	0.84	5.63e-06	7	GPCPD1
2.81e-10	0.445576	0.258	0.197	6.21e-06	7	YWHAQ
3.02e-10	0.395705	0.289	0.226	6.67e-06	7	RPL22L1
3.45e-10	0.400946	0.509	0.467	7.62e-06	7	NDFIP1
4.75e-10	0.371489	0.289	0.224	1.05e-05	7	B3GNT5
5.29e-10	0.432345	0.49	0.445	1.17e-05	7	P4HA1
6.71e-10	0.401191	0.277	0.212	1.48e-05	7	BCL2L11
8.76e-10	0.461884	0.367	0.317	1.93e-05	7	ABCE1
9.05e-10	0.498885	0.53	0.501	2e-05	7	HK2
9.81e-10	0.362965	0.307	0.246	2.17e-05	7	DAZAP2
1.07e-09	0.413748	0.269	0.206	2.37e-05	7	IRS2
1.08e-09	0.389717	0.44	0.393	2.38e-05	7	SRSF10
1.18e-09	0.332954	0.773	0.762	2.61e-05	7	CHKA
1.48e-09	0.408809	0.276	0.214	3.27e-05	7	ZNF131
1.51e-09	0.390916	0.332	0.281	3.34e-05	7	SRSF6
1.57e-09	0.368044	0.448	0.403	3.48e-05	7	ATF4
1.71e-09	0.376765	0.266	0.207	3.79e-05	7	AKIRIN2
1.9e-09	0.379525	0.356	0.3	4.19e-05	7	RLIM
3.09e-09	0.370082	0.387	0.335	6.83e-05	7	NR1D2
3.82e-09	0.356419	0.276	0.215	8.45e-05	7	MOB4
4.75e-09	0.274187	0.656	0.639	0.000104843	7	HNRNPDL
5.15e-09	0.360111	0.394	0.348	0.000113705	7	BZW1
5.32e-09	0.47052	0.265	0.213	0.000117461	7	ZNFX1
5.73e-09	0.417466	0.481	0.455	0.000126569	7	NFE2L2
5.76e-09	0.474613	0.303	0.247	0.000127336	7	SLC17A5
6.63e-09	0.317429	0.519	0.488	0.000146556	7	HNRNPA3
8.03e-09	0.43903	0.469	0.432	0.000177465	7	ZRANB1
1.26e-08	0.420961	0.252	0.2	0.000277389	7	PLEKHB2
1.36e-08	0.422927	0.254	0.201	0.000300697	7	EIF2A
1.7e-08	0.363125	0.506	0.476	0.000375494	7	LOC711104
2.1e-08	0.375965	0.291	0.238	0.000463104	7	ZMYM5
2.15e-08	0.53991	0.43	0.4	0.000475071	7	DR1
2.19e-08	0.356458	0.264	0.208	0.000484179	7	UBE2N
2.28e-08	0.358462	0.288	0.234	0.000504646	7	PPP1R15B
2.43e-08	0.409446	0.42	0.378	0.000537493	7	TRAM1
4.08e-08	0.506125	0.594	0.589	0.000902212	7	IL18
4.16e-08	0.498564	0.534	0.536	0.000919522	7	ANKRD10
6.38e-08	0.436798	0.289	0.236	0.0014088	7	LOC695887
6.72e-08	0.376402	0.299	0.246	0.00148491	7	LOC702046
7.13e-08	0.346178	0.377	0.338	0.00157505	7	ZNF207
7.2e-08	0.338995	0.447	0.411	0.00159087	7	PRPF38B
7.35e-08	0.292217	0.353	0.295	0.00162267	7	CCL3
8.33e-08	0.295442	0.633	0.621	0.00184017	7	IFNGR2
1.2e-07	0.443025	0.588	0.57	0.00264116	7	RGL1
1.25e-07	0.351536	0.258	0.205	0.00277027	7	LOC114673087
1.26e-07	0.375272	0.499	0.462	0.00278985	7	CMTM6
1.28e-07	0.389413	0.435	0.403	0.00283839	7	SNX5
1.5e-07	0.435903	0.38	0.34	0.00331623	7	ASAH1
1.58e-07	0.359302	0.413	0.373	0.00348446	7	AP1G1
1.77e-07	0.334336	0.278	0.228	0.00391301	7	BICRAL
1.87e-07	0.384453	0.259	0.21	0.00412818	7	KBTBD2
2.43e-07	0.343895	0.599	0.582	0.00537307	7	CD163
2.69e-07	0.354994	0.255	0.204	0.00593664	7	WHAMM
3.58e-07	0.440612	0.293	0.251	0.00791711	7	SUGT1
3.61e-07	0.256947	0.648	0.63	0.00797431	7	PFKFB3
3.96e-07	0.390278	0.602	0.596	0.00874069	7	OLR1
5.4e-07	0.371386	0.387	0.351	0.0119393	7	PPM1A
5.62e-07	0.376425	0.335	0.293	0.0124117	7	CSGALNACT2
5.77e-07	0.303825	0.274	0.223	0.0127394	7	KLHL2
6.88e-07	0.419955	0.315	0.267	0.0151988	7	DNAJC3
8.04e-07	0.26843	0.65	0.655	0.0177612	7	TRIM22
9.5e-07	0.327055	0.422	0.39	0.0209804	7	SUB1
1.08e-06	0.317995	0.426	0.398	0.0237617	7	HNRNPF
1.1e-06	0.334048	0.284	0.24	0.0242291	7	ZNF217
1.1e-06	0.396245	0.319	0.275	0.0243862	7	LOC106995137
1.11e-06	0.319699	0.266	0.221	0.0244511	7	LOC720244
1.12e-06	0.310222	0.376	0.326	0.0247829	7	SESN1
1.26e-06	0.383371	0.428	0.393	0.0278742	7	PER3
1.33e-06	0.361241	0.383	0.341	0.0293554	7	CPEB4
1.45e-06	0.344882	0.264	0.217	0.0321377	7	ARFGAP3
1.51e-06	0.38492	0.33	0.285	0.033411	7	N4BP2L1
1.84e-06	0.360772	0.347	0.31	0.0407044	7	IRF2BP2
2.36e-06	0.286011	0.618	0.625	0.0521402	7	MOB1A
2.6e-06	0.425421	0.411	0.383	0.0574468	7	FAR1
2.83e-06	0.388037	0.347	0.306	0.0624313	7	BASP1
2.98e-06	0.291384	0.259	0.215	0.0657792	7	EDEM1
3.45e-06	0.322611	0.477	0.456	0.0761853	7	MIER1
5.33e-06	0.339468	0.277	0.235	0.117669	7	LAPTM4B
6.51e-06	0.303434	0.341	0.301	0.143887	7	ELMOD3
7.49e-06	0.281115	0.509	0.481	0.165526	7	ARHGAP25
7.7e-06	0.251948	0.287	0.244	0.170195	7	RHEB
8.44e-06	0.361622	0.372	0.338	0.186426	7	DSE
9.67e-06	0.39015	0.491	0.487	0.213575	7	TM9SF3
9.68e-06	0.251514	0.526	0.51	0.21396	7	RHOA
1.15e-05	0.312761	0.309	0.275	0.25434	7	PRNP
1.32e-05	0.353197	0.302	0.263	0.292624	7	ANXA5
2.02e-05	0.253888	0.28	0.237	0.445398	7	STK17A
2.52e-05	0.324404	0.358	0.323	0.557283	7	CD84
2.61e-05	0.37878	0.444	0.425	0.577395	7	KIF5B
2.69e-05	0.28613	0.568	0.582	0.594327	7	CDC42
3.03e-05	0.361463	0.252	0.216	0.670488	7	MFSD14B
5.32e-05	0.314735	0.338	0.298	1	7	LOC100426537
5.9e-05	0.332719	0.478	0.468	1	7	DRAM2
7.35e-05	0.257061	0.398	0.356	1	7	RAB20
8.29e-05	0.312692	0.483	0.476	1	7	BTAF1
8.68e-05	0.369292	0.352	0.322	1	7	RHOQ
0.000126512	0.276178	0.265	0.231	1	7	GAK
0.000137596	0.378122	0.299	0.272	1	7	LAMP2
0.000142518	0.257404	0.316	0.286	1	7	HNRNPA1
0.000164836	0.260881	0.469	0.462	1	7	MORF4L1
0.000224874	0.275865	0.254	0.221	1	7	TMIGD3
0.000237439	0.268583	0.403	0.388	1	7	U2AF1
0.000320178	0.32499	0.375	0.35	1	7	TLR2
0.000326221	0.38326	0.401	0.381	1	7	PDGFB
0.000327171	0.28048	0.371	0.355	1	7	HNRNPH3
0.00032742	0.259245	0.584	0.588	1	7	PCED1B
0.000359508	0.352913	0.543	0.55	1	7	ATP6V0A1
0.000392345	0.292202	0.253	0.223	1	7	RIOK3
0.000559606	0.302371	0.596	0.61	1	7	APPL2
0.000568105	0.333668	0.416	0.414	1	7	AP2B1
0.000579104	0.273636	0.37	0.352	1	7	DHRS7
0.000644627	0.264406	0.394	0.382	1	7	VCP
0.000848379	0.281698	0.483	0.485	1	7	SPAG9
0.00086592	0.257746	0.604	0.617	1	7	45357
0.000868744	0.291578	0.485	0.481	1	7	NRROS
0.00094047	0.274978	0.311	0.284	1	7	EFCAB2
0.000943242	0.289933	0.325	0.301	1	7	SALL1
0.000953915	0.327987	0.277	0.252	1	7	YIPF5
0.00132379	0.278064	0.479	0.467	1	7	NRP2
0.00171928	0.254007	0.639	0.648	1	7	MTUS1
0.00177238	0.26677	0.34	0.323	1	7	TLR1
0.00199421	0.360223	0.395	0.395	1	7	CCR1
0.00228106	0.277483	0.361	0.345	1	7	ARHGEF7
0.00308642	0.266523	0.425	0.425	1	7	YTHDF3
0.00517593	0.265601	0.328	0.314	1	7	ILKAP
0.00578367	0.263434	0.309	0.295	1	7	CD58
0.00597044	0.302211	0.467	0.47	1	7	RNASEH2B
0.00828305	0.270162	0.36	0.354	1	7	SEC14L1
0.00914548	0.263287	0.423	0.428	1	7	KIF1B
0.00956209	0.2731	0.306	0.292	1	7	PDPN

## Sheet: Cluster 8
p_val	avg_log2FC	pct.1	pct.2	p_val_adj	cluster	gene
0	1.83899	0.315	0.006	0	8	DIAPH3
0	1.83251	0.29	0.001	0	8	MKI67
0	1.77381	0.323	0.009	0	8	TOP2A
0	1.42193	0.336	0.007	0	8	CIT
0	1.34998	0.273	0.009	0	8	SYNE2
0	1.34601	0.356	0.036	0	8	CENPP
0	1.09776	0.26	0.005	0	8	KIF11
0	1.03758	0.271	0.012	0	8	KNL1
0	0.970134	0.33	0.018	0	8	KNTC1
0	0.96737	0.321	0.02	0	8	BRCA2
0	0.95193	0.279	0.013	0	8	TACC3
0	0.861118	0.273	0.008	0	8	POLQ
0	0.855681	0.288	0.022	0	8	LMNB1
1.5e-295	0.877875	0.262	0.022	3.31e-291	8	ZGRF1
5.5e-269	1.56013	0.266	0.026	1.21e-264	8	CENPF
7.48e-242	0.708356	0.251	0.025	1.65e-237	8	CENPU
2.86e-230	1.42854	0.376	0.057	6.32e-226	8	EZH2
3.53e-206	0.962351	0.268	0.032	7.79e-202	8	ECT2
1.6e-144	0.721912	0.255	0.039	3.54e-140	8	BARD1
1.76e-117	0.798617	0.266	0.05	3.89e-113	8	NCAPG2
1.03e-116	1.20031	0.38	0.098	2.28e-112	8	ATAD2
1.03e-102	0.820183	0.293	0.065	2.28e-98	8	RTKN2
7e-90	1.08164	0.325	0.086	1.55e-85	8	RFC3
1.71e-83	0.682407	0.255	0.059	3.78e-79	8	ATAD5
8.54e-81	1.91076	0.271	0.069	1.89e-76	8	PPM1E
6.87e-78	1.02371	0.319	0.095	1.52e-73	8	HELLS
1.65e-65	0.701349	0.269	0.076	3.65e-61	8	BRCA1
4.84e-62	0.826483	0.373	0.136	1.07e-57	8	NSD2
1.52e-59	0.94837	0.413	0.161	3.36e-55	8	PBX3
5.96e-59	0.602763	0.28	0.086	1.32e-54	8	FANCI
8.21e-58	0.632327	0.293	0.093	1.81e-53	8	STIL
3.09e-57	0.484772	0.264	0.079	6.82e-53	8	NCAPD2
2.28e-56	0.73329	0.352	0.128	5.04e-52	8	MMS22L
5.02e-56	0.673309	0.31	0.104	1.11e-51	8	KIF20B
1.4e-55	1.2595	0.382	0.156	3.1e-51	8	HIST1H1D
2.49e-55	0.994817	0.347	0.132	5.5e-51	8	HMGB2
6.41e-54	1.23585	0.509	0.258	1.42e-49	8	SMC4
9.21e-50	0.696761	0.356	0.139	2.04e-45	8	MIS18BP1
1.78e-49	0.462212	0.269	0.088	3.93e-45	8	LOC716070
2.22e-45	0.566687	0.369	0.151	4.9e-41	8	VRK1
1.14e-44	0.740379	0.349	0.144	2.51e-40	8	NCAPD3
1.31e-42	0.410699	0.266	0.091	2.9e-38	8	ZNF367
1.45e-41	0.524945	0.323	0.128	3.2e-37	8	CENPJ
1.44e-38	0.742184	0.559	0.321	3.18e-34	8	PRIM2
1.82e-35	0.438437	0.29	0.117	4.03e-31	8	RRM1
5.05e-35	0.521415	0.328	0.143	1.12e-30	8	H2AFZ
7.22e-35	0.722939	0.38	0.191	1.6e-30	8	TMPO
4.48e-34	0.390956	0.258	0.099	9.9e-30	8	MPHOSPH9
5.53e-33	0.465717	0.275	0.113	1.22e-28	8	LOC106996415
6.66e-33	0.758496	0.367	0.18	1.47e-28	8	POLA1
1.22e-31	0.458811	0.299	0.13	2.7e-27	8	CEP57L1
1.1e-29	0.558922	0.31	0.145	2.42e-25	8	CDK5RAP2
2.9e-29	0.430232	0.286	0.125	6.41e-25	8	FANCL
5.05e-29	0.82627	0.424	0.248	1.12e-24	8	CEP192
4.16e-28	0.752117	0.437	0.256	9.19e-24	8	CENPC
8.81e-28	0.542543	0.446	0.246	1.95e-23	8	ST3GAL3
1.5e-27	0.465465	0.323	0.155	3.32e-23	8	LIN54
6.61e-27	0.384993	0.268	0.117	1.46e-22	8	PCNA
1.02e-26	0.577284	0.509	0.316	2.26e-22	8	CNTLN
1.28e-26	0.388065	0.31	0.144	2.82e-22	8	RBM15
4.04e-25	0.621295	0.708	0.522	8.92e-21	8	RAD51B
5.97e-25	0.50033	0.458	0.266	1.32e-20	8	CEP295
1.02e-24	0.478072	0.452	0.259	2.25e-20	8	HIST2H2AC
1.31e-24	0.462132	0.461	0.273	2.9e-20	8	SUZ12
1.68e-23	0.716306	0.613	0.437	3.7e-19	8	LCORL
3.9e-23	0.484401	0.485	0.299	8.61e-19	8	FANCC
8.1e-23	0.343459	0.256	0.119	1.79e-18	8	RBL1
1.34e-22	0.489631	0.522	0.335	2.97e-18	8	NUCKS1
5.86e-22	0.621578	0.352	0.192	1.29e-17	8	UTRN
1.15e-21	0.381483	0.352	0.19	2.54e-17	8	TUBB
1.33e-21	0.370815	0.382	0.21	2.94e-17	8	RAD50
1.92e-21	0.532633	0.404	0.243	4.23e-17	8	CKAP5
2.75e-21	0.402754	0.295	0.146	6.07e-17	8	C7H15orf41
7.58e-21	0.412242	0.424	0.245	1.67e-16	8	ZRANB3
9.72e-21	0.574495	0.635	0.466	2.15e-16	8	PDS5B
1.18e-20	0.38409	0.369	0.206	2.61e-16	8	DNMT1
1.55e-20	0.362746	0.386	0.218	3.43e-16	8	ATR
1.62e-20	0.455772	0.393	0.231	3.58e-16	8	RAD21
1.05e-19	0.519465	0.618	0.442	2.32e-15	8	CCDC88A
1.3e-19	0.28692	0.273	0.135	2.86e-15	8	POLH
1.48e-19	0.577738	0.43	0.272	3.26e-15	8	LOC696005
1.8e-19	0.26595	0.28	0.14	3.97e-15	8	BCAP29
2.85e-19	0.291609	0.268	0.132	6.3e-15	8	LOC106994675
3.38e-19	0.328138	0.308	0.162	7.46e-15	8	TOPBP1
3.38e-19	0.313335	0.402	0.235	7.46e-15	8	ANP32B
3.72e-19	0.409387	0.255	0.126	8.22e-15	8	ITGA6
3.83e-19	0.551653	0.72	0.581	8.47e-15	8	FAF1
4.08e-19	0.334743	0.576	0.376	9e-15	8	NRP1
4.31e-19	0.367546	0.275	0.14	9.52e-15	8	FANCM
4.49e-19	0.533141	0.585	0.429	9.93e-15	8	LOC696872
7.5e-19	0.416521	0.893	0.804	1.66e-14	8	STAG1
1.1e-18	0.358642	0.395	0.23	2.42e-14	8	AZIN1
6.56e-18	0.318239	0.38	0.222	1.45e-13	8	FAM129A
8.46e-18	0.348687	0.279	0.147	1.87e-13	8	ALMS1
1.09e-17	0.335247	0.306	0.167	2.4e-13	8	ATP6V1B2
1.55e-17	0.332094	0.328	0.181	3.43e-13	8	CEP83
1.64e-17	0.360163	0.402	0.241	3.63e-13	8	SRBD1
2.13e-17	0.37858	0.478	0.306	4.7e-13	8	MAGI3
5.16e-17	0.541512	0.541	0.4	1.14e-12	8	HP1BP3
5.92e-17	0.268324	0.279	0.145	1.31e-12	8	P4HB
9.79e-17	0.320882	0.256	0.133	2.16e-12	8	UBALD2
1.22e-16	0.34999	0.343	0.197	2.69e-12	8	CEP57
1.93e-16	0.430792	0.459	0.306	4.25e-12	8	UBAP2
2.43e-16	0.280052	0.279	0.148	5.37e-12	8	ABHD3
6.54e-16	0.343636	0.411	0.26	1.45e-11	8	RIF1
2.17e-15	0.371322	0.297	0.165	4.79e-11	8	MITF
3.06e-15	0.312339	0.314	0.185	6.76e-11	8	LOC705636
3.1e-15	0.321372	0.319	0.186	6.85e-11	8	PSIP1
3.72e-15	0.322969	0.264	0.141	8.23e-11	8	HIST1H2BJ
4.18e-15	0.331152	0.454	0.297	9.24e-11	8	QSER1
5.44e-15	0.466363	0.441	0.302	1.2e-10	8	PHACTR4
9.92e-15	0.354641	0.41	0.263	2.19e-10	8	RFC1
1.3e-14	0.298064	0.273	0.154	2.88e-10	8	SUGP2
3.36e-14	0.301482	0.345	0.212	7.42e-10	8	PCNT
4.11e-14	0.267279	0.286	0.161	9.08e-10	8	HACE1
7.74e-14	0.263916	0.356	0.218	1.71e-09	8	IPO9
7.88e-14	0.430075	0.729	0.608	1.74e-09	8	MSR1
8.15e-14	0.468787	0.358	0.23	1.8e-09	8	CDK19
8.9e-14	0.31067	0.358	0.223	1.97e-09	8	TUBGCP3
1.3e-13	0.330305	0.434	0.292	2.88e-09	8	LBR
1.35e-13	0.410139	0.303	0.182	2.98e-09	8	CEP112
4.28e-13	0.452224	0.871	0.774	9.46e-09	8	LOC704104
4.89e-13	0.275656	0.45	0.295	1.08e-08	8	CCL3
5.5e-13	0.254168	0.559	0.384	1.21e-08	8	LOC695533
5.61e-13	0.296959	0.458	0.312	1.24e-08	8	DEK
1.3e-12	0.328326	0.565	0.425	2.88e-08	8	KIF5B
1.68e-12	0.34513	0.603	0.459	3.71e-08	8	SMCHD1
2.03e-12	0.311925	0.448	0.31	4.47e-08	8	CTDSPL2
2.66e-12	0.314001	0.375	0.244	5.88e-08	8	RHEB
3.25e-12	0.401797	0.515	0.38	7.17e-08	8	TUBA1B
1.25e-11	0.351013	0.295	0.183	2.76e-07	8	G2E3
1.43e-11	0.265582	0.28	0.168	3.15e-07	8	B3GNT2
1.69e-11	0.328859	0.483	0.352	3.73e-07	8	XPO1
2.29e-11	0.313402	0.577	0.442	5.06e-07	8	PRKDC
4.65e-11	0.269295	0.509	0.365	1.03e-06	8	KATNBL1
6.58e-11	0.280326	0.343	0.22	1.45e-06	8	USP37
7.03e-11	0.411132	0.614	0.478	1.55e-06	8	STOM
1.14e-10	0.330916	0.751	0.666	2.51e-06	8	HNRNPH1
1.25e-10	0.309562	0.537	0.403	2.76e-06	8	PHTF2
1.58e-10	0.35063	0.487	0.354	3.49e-06	8	SCLT1
1.66e-10	0.25975	0.587	0.439	3.67e-06	8	RNGTT
1.68e-10	0.258009	0.362	0.241	3.71e-06	8	PSMD14
1.81e-10	0.318665	0.627	0.492	4e-06	8	DENND1B
1.89e-10	0.326103	0.581	0.449	4.18e-06	8	KIAA1328
1.91e-10	0.263767	0.317	0.2	4.21e-06	8	KIF13A
1.96e-10	0.38495	0.629	0.489	4.32e-06	8	LOC694064
2.34e-10	0.360467	0.74	0.628	5.17e-06	8	RUNX1
2.9e-10	0.262763	0.279	0.171	6.41e-06	8	RBFOX2
3.78e-10	0.317063	0.858	0.764	8.34e-06	8	KLF6
4.03e-10	0.273927	0.43	0.297	8.9e-06	8	LOC100426537
4.39e-10	0.287862	0.435	0.306	9.69e-06	8	TEC
6.23e-10	0.295035	0.627	0.484	1.38e-05	8	PDE4D
7.67e-10	0.274042	0.415	0.292	1.69e-05	8	MICU3
7.96e-10	0.292266	0.624	0.484	1.76e-05	8	SPAG9
8.61e-10	0.298872	0.489	0.366	1.9e-05	8	MAST2
1.13e-09	0.318104	0.648	0.526	2.5e-05	8	HMGB1
1.43e-09	0.315354	0.587	0.46	3.16e-05	8	ELF2
2.4e-09	0.254735	0.572	0.438	5.29e-05	8	SEPTIN7
2.72e-09	0.271151	0.661	0.545	6.02e-05	8	RB1
2.88e-09	0.326762	0.266	0.165	6.36e-05	8	PDE1A
8.35e-09	0.402046	0.354	0.253	0.000184571	8	PLD3
9.05e-09	0.265571	0.452	0.33	0.000199834	8	RARRES2
1.07e-08	0.268239	0.439	0.324	0.000235571	8	RTN3
1.63e-08	0.358094	0.354	0.248	0.000359167	8	THSD4
4.1e-08	0.337743	0.319	0.231	0.000906057	8	TMEM71
4.24e-08	0.253285	0.5	0.377	0.00093773	8	ATP9B
4.54e-08	0.308613	0.456	0.343	0.00100194	8	OTUD1
4.96e-08	0.296701	0.255	0.166	0.00109469	8	INPP5F
5.15e-08	0.350982	0.332	0.233	0.00113844	8	POLD3
6.12e-08	0.259715	0.594	0.498	0.00135266	8	CEP350
1.11e-07	0.293766	0.69	0.587	0.00244818	8	TTC28
1.92e-07	0.250073	0.284	0.193	0.00423178	8	H1FX
2.63e-07	0.259454	0.705	0.598	0.0058133	8	WWOX
2.96e-07	0.387459	0.504	0.409	0.00653972	8	ARL6IP1
3.09e-07	0.267478	0.515	0.398	0.0068311	8	NAV2
4.52e-07	0.359393	0.55	0.457	0.00998923	8	PLD5
5.21e-07	0.311309	0.389	0.296	0.0115041	8	CTCF
9.89e-07	0.250323	0.38	0.282	0.0218441	8	TAGAP
1.05e-06	0.26212	0.705	0.599	0.0232828	8	HIF1A
1.67e-06	0.333037	0.664	0.569	0.0369196	8	RGL1
2.01e-06	0.259263	0.664	0.563	0.0443474	8	SPIDR
4.24e-06	0.342337	0.557	0.48	0.0937419	8	CNTRL
4.44e-06	0.255668	0.697	0.596	0.0981422	8	IL6ST
3.72e-05	0.274324	0.45	0.358	0.822106	8	HNRNPLL
