# Supplementary material for: Opioid-induced immunosuppression of brain myeloid cells in SIV-infected rhesus macaques
Source: Research Square preprint supplement (doi:10.21203/rs.3.rs-7394731/v1), 2025-09-18
Supplement: Supplementary file 3 [file 2e28ec10f5cdab2e4c36e6b9.xlsx]

## Sheet: Morphine vs Saline
Clusters	BaselineProp.Freq	PropMean.Morphine	PropMean.Saline	PropRatio	Tstatistic	P.Value	FDR
CD16+CAM	0.0189663	0.00777667	0.0393133	0.197813	-3.31118	0.00914945	0.0731956
Activated	0.13645	0.157499	0.108953	1.44557	2.39429	0.0404465	0.161786
Proliferating	0.00481547	0.0067848	0.00419067	1.61903	1.84452	0.0984219	0.213607
Microglia-like	0.081776	0.057187	0.0973454	0.587464	-1.79289	0.106804	0.213607
Preactivated	0.00973524	0.00808551	0.011831	0.683417	-1.26346	0.238374	0.381399
CD14+CAM	0.0145681	0.0105278	0.0167564	0.628287	-0.985017	0.35052	0.402051
Homeostatic	0.71434	0.734841	0.70226	1.04639	0.982279	0.351794	0.402051
Antiviral	0.0193488	0.0172985	0.0193508	0.893939	-0.24284	0.813609	0.813609

## Sheet: MorphineSIV vs Saline
Clusters	BaselineProp.Freq	PropMean.MorphineSIV	PropMean.Saline	PropRatio	Tstatistic	P.Value	FDR
Activated	0.13624	0.153804	0.108953	1.41166	1.98858	0.0794877	0.473758
CD16+CAM	0.0232631	0.015393	0.0393133	0.391548	-1.73458	0.11844	0.473758
Microglia-like	0.0898056	0.0740275	0.0973454	0.760462	-0.880262	0.402669	0.854459
Proliferating	0.00483341	0.00660354	0.00419067	1.57577	0.833307	0.42723	0.854459
Preactivated	0.0109213	0.00992897	0.011831	0.839234	-0.43863	0.671752	0.937781
CD14+CAM	0.0180792	0.0150892	0.0167564	0.900505	0.162273	0.874843	0.937781
Homeostatic	0.69662	0.706009	0.70226	1.00534	0.102931	0.92038	0.937781
Antiviral	0.0202376	0.0191447	0.0193508	0.989346	0.0803738	0.937781	0.937781

## Sheet: Saline vs SalineSIV
Clusters	BaselineProp.Freq	PropMean.Saline	PropMean.SalineSIV	PropRatio	Tstatistic	P.Value	FDR
Antiviral	0.026765	0.0193508	0.036384	0.53185	-2.1287	0.0625074	0.379369
Activated	0.133807	0.108953	0.154135	0.706866	-1.86897	0.0948423	0.379369
Homeostatic	0.675947	0.70226	0.663028	1.05917	1.01203	0.338259	0.895761
CD16+CAM	0.0308243	0.0393133	0.0297462	1.32162	0.793961	0.44788	0.895761
Proliferating	0.00394803	0.00419067	0.00479679	0.87364	-0.45231	0.661874	0.913235
Microglia-like	0.0994606	0.0973454	0.0845489	1.15135	0.419321	0.684927	0.913235
CD14+CAM	0.018109	0.0167564	0.0162962	1.02824	-0.0960057	0.925644	0.945816
Preactivated	0.0111397	0.011831	0.0110646	1.06927	0.0699047	0.945816	0.945816

## Sheet: Morphine vs MorphineSIV
Clusters	BaselineProp.Freq	PropMean.Morphine	PropMean.MorphineSIV	PropRatio	Tstatistic	P.Value	FDR
CD16+CAM	0.0114909	0.00777667	0.015393	0.505208	-2.73523	0.0245996	0.196797
Preactivated	0.00867604	0.00808551	0.00992897	0.814335	-1.43216	0.188383	0.479667
CD14+CAM	0.011838	0.0105278	0.0150892	0.697705	-1.37687	0.204273	0.479667
Homeostatic	0.723851	0.734841	0.706009	1.04084	1.2654	0.239834	0.479667
Microglia-like	0.0638942	0.057187	0.0740275	0.77251	-0.999123	0.345754	0.553207
Antiviral	0.0184703	0.0172985	0.0191447	0.903566	-0.474616	0.647204	0.740846
Proliferating	0.00634315	0.0067848	0.00660354	1.02745	0.473101	0.64824	0.740846
Activated	0.155436	0.157499	0.153804	1.02402	0.281306	0.785309	0.785309

## Sheet: Morphine vs SalineSIV
Clusters	BaselineProp.Freq	PropMean.Morphine	PropMean.SalineSIV	PropRatio	Tstatistic	P.Value	FDR
Antiviral	0.0252848	0.0172985	0.036384	0.475441	-3.04798	0.0145176	0.116141
Homeostatic	0.702375	0.734841	0.663028	1.10831	2.30957	0.0474404	0.180768
CD16+CAM	0.0193366	0.00777667	0.0297462	0.261434	-2.08722	0.0677878	0.180768
Preactivated	0.00889328	0.00808551	0.0110646	0.730758	-1.54804	0.157446	0.272019
Microglia-like	0.0738588	0.057187	0.0845489	0.676378	-1.48656	0.172714	0.272019
Proliferating	0.00542509	0.0067848	0.00479679	1.41445	1.37415	0.204015	0.272019
CD14+CAM	0.0118383	0.0105278	0.0162962	0.646029	-1.15031	0.280884	0.32101
Activated	0.152988	0.157499	0.154135	1.02183	0.23322	0.821027	0.821027

## Sheet: MorphineSIV vs SalineSIV
Clusters	BaselineProp.Freq	PropMean.MorphineSIV	PropMean.SalineSIV	PropRatio	Tstatistic	P.Value	FDR
Antiviral	0.0266901	0.0191447	0.036384	0.526183	-2.47708	0.0372149	0.297719
Homeostatic	0.681665	0.706009	0.663028	1.06482	1.49121	0.172838	0.69135
CD16+CAM	0.0241847	0.015393	0.0297462	0.517479	-0.612558	0.556548	0.86042
Preactivated	0.0101667	0.00992897	0.0110646	0.897367	-0.502449	0.628388	0.86042
Microglia-like	0.0823274	0.0740275	0.0845489	0.875559	-0.495972	0.632758	0.86042
Proliferating	0.00548711	0.00660354	0.00479679	1.37666	0.477489	0.645315	0.86042
CD14+CAM	0.0155917	0.0150892	0.0162962	0.925934	0.0582951	0.95489	0.988368
Activated	0.153888	0.153804	0.154135	0.997853	-0.0150228	0.988368	0.988368
