# Supplementary material for: Opioid-induced immunosuppression of brain myeloid cells in SIV-infected rhesus macaques
Source: Research Square preprint supplement (doi:10.21203/rs.3.rs-7394731/v1), 2025-09-18
Supplement: Supplementary file 4 [file 97befe5c393d6f9973f0a98c.xlsx]

## Sheet: Module 2
Ingenuity Canonical Pathways	-log(p-value)	Ratio	z-score	Molecules
Ribosomal Quality Control Signaling Pathway	75.3	0.335	9.381	FAU,PSMA2,PSMA4,PSMA7,PSMB1,PSMB4,PSMB5,PSMB6,PSMD8,PSME1,RACK1,RPL10,RPL10A,RPL11,RPL12,RPL13,RPL13A,RPL14,RPL15,RPL17,RPL18,RPL19,RPL21,RPL22,RPL22L1,RPL23,RPL23A,RPL24,RPL26,RPL27,RPL27A,RPL28,RPL29,RPL3,RPL30,RPL31,RPL32,RPL34,RPL35,RPL35A,RPL36,RPL36AL,RPL37,RPL37A,RPL38,RPL39,RPL4,RPL41,RPL5,RPL6,RPL7,RPL7A,RPL8,RPL9,RPLP0,RPLP1,RPLP2,RPS10,RPS11,RPS12,RPS13,RPS14,RPS15,RPS15A,RPS16,RPS17,R…
EIF2 Signaling	82.6	0.378	5.667	ACTB,ATF4,EIF1,EIF1AX,EIF2S2,EIF3D,EIF3F,EIF3G,EIF3K,EIF4A1,FAU,HNRNPA1,PABPC1,PPP1CA,RPL10,RPL10A,RPL11,RPL12,RPL13,RPL13A,RPL14,RPL15,RPL17,RPL18,RPL19,RPL21,RPL22,RPL22L1,RPL23,RPL23A,RPL24,RPL26,RPL27,RPL27A,RPL28,RPL29,RPL3,RPL30,RPL31,RPL32,RPL34,RPL35,RPL35A,RPL36,RPL36AL,RPL37,RPL37A,RPL38,RPL39,RPL4,RPL41,RPL5,RPL6,RPL7,RPL7A,RPL8,RPL9,RPLP0,RPLP1,RPLP2,RPS10,RPS11,RPS12,RPS13,RPS14,RPS1…
Neutrophil Extracellular Trap Signaling Pathway	20.3	0.12	5.642	ATP5F1A,ATP5F1B,ATP5F1D,ATP5F1E,ATP5MC1,ATP5PF,C1QA,C1QB,C1QC,CCR1,CD14,CYC1,FPR1,HMGB1,ITGB1,ITGB2,NDUFA11,NDUFA13,NDUFA2,NDUFA3,NDUFA4,NDUFA6,NDUFA7,NDUFAB1,NDUFB1,NDUFB10,NDUFB11,NDUFB2,NDUFB4,NDUFB5,NDUFB6,NDUFB7,NDUFB8,NDUFB9,NDUFS3,NDUFS6,NDUFS7,NDUFS8,ORAI1,PDIA3,PLAAT3,PYCARD,RAC1,SELPLG,SLC25A4,SLC25A5,TOMM20,TOMM6,TOMM7,TSPO,VDAC1
Phagosome Formation	4.38	0.0502	4.849	ADORA3,ADRA2C,ARF6,ARPC1B,ARPC3,ARPC4,ARPC5,C3AR1,C5AR1,CCR1,CD14,CDC42,CFL1,CX3CR1,FCER1G,FCGR1A,FPR1,GPR34,HMOX1,ITGB1,ITGB2,MARCKS,MYL12A,MYL12B,MYL6,P2RY11,P2RY12,P2RY13,PLAAT3,PTAFR,PTGDR2,RAC1,RHOA,TIMD4,TLR1,TLR9
S100 Family Signaling Pathway	1.71	0.0368	4.2	ADORA3,ADRA2C,ATF4,ATP5F1A,ATP5F1B,ATP5F1D,ATP5F1E,ATP5PO,BSG,C3AR1,C5AR1,CALM1,CALM2,CCR1,CX3CR1,FCGR1A,FPR1,GPR34,MAP3K8,P2RY11,P2RY12,P2RY13,PDIA3,PTAFR,PTGDR2,RAC1,RHOA,S100A11,SERPINF1
Protein Ubiquitination Pathway	4.62	0.0707	4.123	ANAPC11,B2M,DNAJC19,ELOB,HSP90B1,HSPA8,HSPE1,PSMA2,PSMA4,PSMA7,PSMB1,PSMB4,PSMB5,PSMB6,PSMD8,PSME1,RBX1,UBA52,UBB,UBC
Insulin Secretion Signaling Pathway	2.88	0.0563	4	ATF4,EIF1,EIF2S2,EIF4A1,GPAA1,PABPC1,PDIA3,SEC11C,SEC61B,SEC61G,SPCS1,SPCS2,SPCS3,SRP14,SRP9,SSR2,SSR4
G-Protein Coupled Receptor Signaling	2.44	0.0414	3.674	ADORA3,ADRA2C,ATF4,C3AR1,C5AR1,CALM1,CALM2,CCR1,CDC42,CX3CR1,FPR1,GNAI2,GNB2,GNG5,GPR34,MAP3K8,MYL12A,MYL12B,MYL6,NFKBIA,NFKBIB,P2RY11,P2RY12,P2RY13,PTAFR,PTGDR2,RAC1,RGS10,RGS18,RGS2
Role of Macrophages, Fibroblasts and Endothelial Cells in Rheumatoid Arthritis	1.97	0.0466	3.606	ATF4,C5AR1,CALM1,CALM2,CEBPA,CEBPB,CEBPD,FCGR1A,MIF,NFKBIA,NFKBIB,PDIA3,RAC1,RHOA,TLR1,TLR9
Irritable Bowel Syndrome Signaling Pathway	1.55	0.0445	3.606	CDC42,IFNGR1,MYL12A,MYL12B,MYL6,RAC1,RHOA,RHOG,TLR1,TLR9,TNFSF12,TNFSF13,UBC
Cachexia Signaling Pathway	2.93	0.0526	3.578	CEBPB,CEBPD,DDIT4,EIF1,EIF2S2,HMGB1,HSP90B1,HSPA8,IFNGR1,PSMA2,PSMA4,PSMA7,PSMB1,PSMB4,PSMB5,PSMB6,PSMD8,PSME1,TNFSF12,TNFSF13
Regulation of Actin-based Motility by Rho	7.79	0.142	3.464	ACTB,ARPC1B,ARPC3,ARPC4,ARPC5,CDC42,CFL1,ITGB1,ITGB2,MYL12A,MYL12B,MYL6,PFN1,RAC1,RHOA,RHOG
Fcγ Receptor-mediated Phagocytosis in Macrophages and Monocytes	5.27	0.121	3.464	ACTB,ACTG1,ARF6,ARPC1B,ARPC3,ARPC4,ARPC5,CDC42,FCGR1A,HMOX1,RAB11A,RAC1
Signaling by Rho Family GTPases	4.42	0.0706	3.464	ACTB,ACTG1,ARPC1B,ARPC3,ARPC4,ARPC5,CDC42,CFL1,GNAI2,GNB2,GNG5,ITGB1,ITGB2,MYL12A,MYL12B,MYL6,RAC1,RHOA,RHOG
Microautophagy Signaling Pathway	3.8	0.0813	3.464	CHMP2A,HSPA8,PSMA2,PSMA4,PSMA7,PSMB1,PSMB4,PSMB5,PSMB6,PSMD8,PSME1,TOMM20,VAMP8
ILK Signaling	3.39	0.0704	3.464	ACTB,ACTG1,ATF4,CDC42,CFL1,ITGB1,ITGB2,MYL6,NACA,PPP1R14B,RAC1,RHOA,RHOG,TMSB4X
Neuroinflammation Signaling Pathway	1.64	0.0435	3.464	ATF4,B2M,CSF1R,CX3CR1,HMGB1,HMOX1,IFNGR1,NFE2L2,PSENEN,PYCARD,RAC1,TLR1,TLR9,TREM2,TYROBP
CREB Signaling in Neurons	1.7	0.0385	3.357	ADORA3,ADRA2C,ATF4,C3AR1,C5AR1,CALM1,CALM2,CCR1,CX3CR1,FPR1,GNAI2,GNB2,GNG5,GPR34,P2RY11,P2RY12,P2RY13,PDIA3,POLR2F,POLR2J,POLR2K,POLR2L,PTAFR,PTGDR2
Hematoma Resolution Signaling Pathway	15.1	0.13	3.286	CX3CR1,FTH1,FTL,HMGB1,HMOX1,IFNGR1,NDUFA1,NDUFA11,NDUFA13,NDUFA2,NDUFA3,NDUFA4,NDUFA6,NDUFA7,NDUFAB1,NDUFB1,NDUFB10,NDUFB11,NDUFB2,NDUFB4,NDUFB5,NDUFB6,NDUFB7,NDUFB8,NDUFB9,NDUFS3,NDUFS6,NDUFS7,NDUFS8,NFE2L2,RHOA,TNFSF12,TNFSF13,TREM2,TUBA1B
Actin Cytoskeleton Signaling	4.96	0.0772	3.207	ACTB,ACTG1,ARPC1B,ARPC3,ARPC4,ARPC5,BRK1,CD14,CDC42,CFL1,ITGB1,ITGB2,MYL12A,MYL12B,MYL6,PFN1,RAC1,RHOA,TMSB4X
Serotonin Receptor Signaling	1.42	0.0382	3.207	ADRA2C,ATF4,CALM1,CALM2,CDC42,G6PC3,GNAI2,GNB2,GNG5,GPBAR1,HMOX1,ITGB1,NFKBIA,ORAI1,PDIA3,PLAAT3,RAC1,RHOA,RHOG
Immunogenic Cell Death Signaling Pathway	4.52	0.111	3.162	ATF4,BAX,BCAP31,CALR,FPR1,HMGB1,HSP90B1,HSPA8,IFNGR1,PDIA3,PYCARD
RHOA Signaling	4.24	0.096	3.162	ACTB,ACTG1,ARPC1B,ARPC3,ARPC4,ARPC5,CFL1,MYL12A,MYL12B,MYL6,PFN1,RHOA
RAC Signaling	3.18	0.0786	3.162	ARPC1B,ARPC3,ARPC4,ARPC5,BRK1,CDC42,CFL1,ITGB1,ITGB2,RAC1,RHOA
Role of Osteoclasts in Rheumatoid Arthritis Signaling Pathway	1.58	0.0437	3.162	ATF4,CALM1,CALM2,CDC42,CSF1R,FCGR1A,HCST,NFKBIA,NFKBIB,RAC1,RHOA,RHOG,TREM2,TYROBP
Cyclophilin Signaling Pathway	7.22	0.092	3.128	APOE,ATF4,B2M,BSG,CALR,CWC15,CYC1,HNRNPA1,HSPA8,NFKBIA,NFKBIB,PPIA,PPIB,RHOA,SF3B5,SF3B6,SLC25A4,SLC25A5,TOMM20,TOMM6,TOMM7,TSPO,VDAC1
Ephrin Receptor Signaling	3.78	0.0732	3.051	ARPC1B,ARPC3,ARPC4,ARPC5,ATF4,CDC42,CFL1,DOK1,GNAI2,GNB2,GNG5,ITGB1,ITGB2,RAC1,RHOA
Unfolded protein response	4.82	0.12	3	ATF4,CALR,CANX,CEBPA,CEBPB,CEBPD,DNAJC19,HSP90B1,HSPA8,NFE2L2,VCP
Actin Nucleation by ARP-WASP Complex	4.12	0.11	3	ARPC1B,ARPC3,ARPC4,ARPC5,CDC42,ITGB1,ITGB2,RAC1,RHOA,RHOG
Virus Entry via Endocytic Pathways	2.97	0.0794	3	ACTB,ACTG1,AP2M1,AP2S1,B2M,CDC42,CLTA,ITGB1,ITGB2,RAC1
Protein Sorting Signaling Pathway	1.76	0.0532	3	ARF1,CDC42,CLTA,COPE,HMOX1,KDELR1,RAB11A,RER1,TMED2,TMED9
Nuclear Cytoskeleton Signaling Pathway	1.67	0.0493	3	ACTB,ACTG1,CSNK2B,DCTN3,DYNLL1,ITGB1,ITGB2,RBX1,RHOA,TUBA1B,TUBB4B
Orexin Signaling Pathway	1.66	0.0474	3	ATP6AP1,ATP6AP2,ATP6V0B,ATP6V0C,ATP6V0D1,ATP6V0E1,CALM1,CALM2,GNB2,GNG5,PDIA3,TCIRG1
Leukocyte Extravasation Signaling	1.59	0.05	3	ACTB,ACTG1,CDC42,GNAI2,ITGB1,ITGB2,MYL6,RAC1,RHOA,SELPLG
NGF Signaling	1.89	0.063	2.828	ATF4,BAX,CDC42,MAP3K8,RAC1,RHOA,RHOG,SMPD1
CGAS-STING Signaling Pathway	3.68	0.0839	2.714	ATP6AP1,ATP6AP2,ATP6V0B,ATP6V0C,ATP6V0D1,ATP6V0E1,BAX,NFKBIA,PYCARD,TCIRG1,TNFSF12,TNFSF13
Breast Cancer Regulation by Stathmin1	1.57	0.0378	2.683	ADORA3,ADRA2C,ATF4,C3AR1,C5AR1,CCR1,CX3CR1,FPR1,GNB2,GNG5,GPR34,P2RY11,P2RY12,P2RY13,PPP1CA,PPP1R14B,PTAFR,PTGDR2,RAC1,RHOA,TUBA1B,TUBB,TUBB4B
NER (Nucleotide Excision Repair, Enhanced Pathway)	3.96	0.105	2.646	GTF2H5,HMGN1,NEDD8,POLD4,POLR2F,POLR2J,POLR2K,POLR2L,RBX1,RPA3
Paxillin Signaling	2.35	0.0755	2.646	ACTB,ACTG1,ARF1,ARF6,CDC42,ITGB1,ITGB2,RAC1
Xenobiotic Metabolism General Signaling Pathway	2.11	0.0602	2.646	FTL,GSTO1,GSTP1,HMOX1,MAF,MAP3K8,MGST2,MGST3,NFE2L2,RBX1
Epithelial Adherens Junction Signaling	3.21	0.0745	2.53	ARPC1B,ARPC3,ARPC4,ARPC5,CDC42,CFL1,MYL12A,MYL12B,RAC1,RHOA,YWHAB,YWHAH
NAFLD Signaling Pathway	1.48	0.046	2.53	ATF4,BAX,CTSB,G6PC3,MBOAT7,NFE2L2,PYCARD,TLR1,TLR9,TNFSF12,TNFSF13
Integrin Signaling	5.32	0.0853	2.5	ACTB,ACTG1,ARF1,ARF5,ARF6,ARPC1B,ARPC3,ARPC4,ARPC5,CDC42,ITGB1,ITGB2,MYL12A,MYL12B,PFN1,RAC1,RHOA,RHOG
Coronavirus Replication Pathway	89.4	0.503	2.449	COPE,CTSL,FAU,HNRNPA1,RPL10,RPL10A,RPL11,RPL12,RPL13,RPL13A,RPL14,RPL15,RPL17,RPL18,RPL19,RPL21,RPL22,RPL22L1,RPL23,RPL23A,RPL24,RPL26,RPL27,RPL27A,RPL28,RPL29,RPL3,RPL30,RPL31,RPL32,RPL34,RPL35,RPL35A,RPL36,RPL36AL,RPL37,RPL37A,RPL38,RPL39,RPL4,RPL41,RPL5,RPL6,RPL7,RPL7A,RPL8,RPL9,RPLP0,RPLP1,RPLP2,RPS10,RPS11,RPS12,RPS13,RPS14,RPS15,RPS15A,RPS16,RPS17,RPS18,RPS19,RPS2,RPS20,RPS21,RPS23,RPS24,RP…
Antigen Presentation Pathway	3.24	0.14	2.449	B2M,CALR,CANX,PDIA3,PSMB5,PSMB6
Assembly of RNA Polymerase II Complex	2.84	0.118	2.449	GTF2H5,POLR2F,POLR2J,POLR2K,POLR2L,TAF10
Sphingosine-1-phosphate Signaling	1.97	0.065	2.449	ASAH1,CDC42,GNAI2,PDIA3,RAC1,RHOA,RHOG,SMPD1
Role of Pattern Recognition Receptors in Recognition of Bacteria and Viruses	1.87	0.0584	2.449	C1QA,C1QB,C1QC,C3AR1,C5AR1,TLR1,TLR9,TNFSF12,TNFSF13
HMGB1 Signaling	1.37	0.05	2.449	CDC42,HMGB1,IFNGR1,RAC1,RHOA,RHOG,TNFSF12,TNFSF13
NRF2-mediated Oxidative Stress Response	5.46	0.0778	2.333	ACTB,ACTG1,AKR7A2,ATF4,DNAJC19,ERP29,FTH1,FTL,GSTO1,GSTP1,HMOX1,HSP90B1,MAF,MGST2,MGST3,NFE2L2,PPIB,PRDX1,RBX1,UBB,VCP
Reelin Signaling in Neurons	2.65	0.0719	2.333	APOE,ARPC1B,ARPC3,ARPC4,ARPC5,CDC42,CFL1,ITGB1,RAC1,RHOA
Necroptosis Signaling Pathway	2.08	0.0595	2.333	PYCARD,SLC25A3,SLC25A4,SLC25A5,TOMM20,TOMM6,TOMM7,TSPO,UBC,VDAC1
Netrin Signaling	1.44	0.0492	2.333	ARPC1B,ARPC3,ARPC4,ARPC5,CDC42,GPAA1,PGK1,RAC1,RHOA
Synaptogenesis Signaling Pathway	2.56	0.0525	2.324	AP2M1,AP2S1,APOE,ARPC1B,ARPC3,ARPC4,ARPC5,ATF4,CALM1,CALM2,CDC42,CFL1,GPAA1,HSPA8,MARCKS,RAC1,RHOA
Production of Nitric Oxide and Reactive Oxygen Species in Macrophages	3.42	0.0707	2.309	APOE,CDC42,IFNGR1,IRF8,MAP3K8,NFKBIA,NFKBIB,PCYOX1,PPP1CA,PPP1R14B,RAC1,RHOA,RHOG,SERPINA1
Adrenergic Receptor Signaling Pathway (Enhanced)	2.14	0.0553	2.309	ADRA2C,ATP6AP1,ATP6AP2,ATP6V0B,ATP6V0C,ATP6V0D1,ATP6V0E1,GNAI2,PDIA3,TCIRG1,TNFSF12,TNFSF13
Remodeling of Epithelial Adherens Junctions	5.07	0.141	2.236	ACTB,ACTG1,ARF6,ARPC1B,ARPC3,ARPC4,ARPC5,TUBA1B,TUBB,TUBB4B
Agrin Interactions at Neuromuscular Junction	2.17	0.087	2.236	ACTB,ACTG1,CDC42,CHRNA1,ITGB1,RAC1
Apelin Adipocyte Signaling Pathway	2.09	0.0745	2.236	GNAI2,GPX1,GPX4,GSTP1,MGST2,MGST3,RAC1
CXCR4 Signaling	1.94	0.0568	2.236	CDC42,GNAI2,GNB2,GNG5,MYL12A,MYL12B,MYL6,RAC1,RHOA,RHOG
UFMylation Signaling Pathway	1.55	0.0714	2.236	EIF4A1,GPX4,PABPC1,RPL26,RPN1
IL-8 Signaling	3.12	0.066	2.121	BAX,CDC42,CSTB,GNAI2,GNB2,GNG5,HMOX1,ITGB2,MYL12B,NFKBIA,NFKBIB,RAC1,RHOA,RHOG
Estrogen Receptor Signaling	12.7	0.0962	2.111	ATF4,ATP5F1A,ATP5F1B,ATP5F1D,ATP5F1E,ATP5MC1,ATP5PF,CFL1,CYC1,GNAI2,GNB2,GNG5,HSP90B1,MYL12A,MYL12B,MYL6,NDUFA11,NDUFA13,NDUFA2,NDUFA3,NDUFA4,NDUFA6,NDUFA7,NDUFAB1,NDUFB1,NDUFB10,NDUFB11,NDUFB2,NDUFB4,NDUFB5,NDUFB6,NDUFB7,NDUFB8,NDUFB9,NDUFS3,NDUFS6,NDUFS7,NDUFS8,PDIA3,RHOA
mTOR Signaling	24.6	0.191	2	CDC42,DDIT4,EIF3D,EIF3F,EIF3G,EIF3K,EIF4A1,FAU,HMOX1,RAC1,RHOA,RHOG,RPS10,RPS11,RPS12,RPS13,RPS14,RPS15,RPS15A,RPS16,RPS17,RPS18,RPS19,RPS2,RPS20,RPS21,RPS23,RPS24,RPS25,RPS26,RPS27,RPS27L,RPS28,RPS29,RPS3,RPS4X,RPS4Y1,RPS5,RPS7,RPS8,RPS9,RPSA
Macropinocytosis Signaling	3.28	0.105	2	ARF6,CD14,CDC42,CSF1R,ITGB1,ITGB2,RAC1,RHOA
iNOS Signaling	2.79	0.115	2	CALM1,CALM2,CD14,IFNGR1,NFKBIA,NFKBIB
Caveolar-mediated Endocytosis Signaling	2.44	0.0864	2	ACTB,ACTG1,B2M,CD48,COPE,ITGB1,ITGB2
PAK Signaling	2.03	0.0667	2	CDC42,CFL1,ITGB1,ITGB2,MYL12A,MYL12B,MYL6,RAC1
Spliceosomal Cycle	1.9	0.0877	2	CWC15,HSPA8,RBM8A,SF3B5,SF3B6
MIF-mediated Glucocorticoid Regulation	1.8	0.1	2	CD14,MIF,NFKBIA,NFKBIB
Thrombin Signaling	1.59	0.048	2	CDC42,GNAI2,GNB2,GNG5,MYL12A,MYL12B,MYL6,PDIA3,RAC1,RHOA,RHOG
MIF Regulation of Innate Immunity	1.5	0.0816	2	CD14,MIF,NFKBIA,NFKBIB
Cardiac Hypertrophy Signaling	2.56	0.0556	1.89	ADRA2C,CALM1,CALM2,CDC42,GNAI2,GNB2,GNG5,MAP3K8,MYL12A,MYL12B,MYL6,PDIA3,RAC1,RHOA,RHOG
mRNA 3 Prime End Processing Signaling Pathway	1.88	0.068	1.89	CIRBP,HNRNPK,PABPC1,PCBP1,PPP1CA,RBM3,SET
IL-27 Signaling Pathway	1.7	0.058	1.89	B2M,C5AR1,IFNGR1,IRF8,MAF,PYCARD,TLR1,TLR9
Natural Killer Cell Signaling	2.28	0.0577	1.732	B2M,CD48,CDC42,CFL1,FCER1G,HCST,HSPA8,ITGB1,LILRB1,MAP3K8,RAC1,TYROBP
Hepatic Fibrosis Signaling Pathway	1.75	0.0423	1.732	ATF4,CALM1,CALM2,CDC42,CEBPB,FTH1,FTL,GNAI2,ITGB1,ITGB2,MYL12A,MYL12B,MYL6,NFKBIA,NFKBIB,RAC1,RHOA,RHOG
fMLP Signaling in Neutrophils	5.05	0.1	1.667	ARPC1B,ARPC3,ARPC4,ARPC5,CALM1,CALM2,CDC42,FPR1,GNAI2,GNB2,GNG5,NFKBIA,NFKBIB,RAC1
Role of MAPK Signaling in Promoting the Pathogenesis of Influenza	3.85	0.094	1.667	ATP6AP1,ATP6AP2,ATP6V0B,ATP6V0C,ATP6V0D1,ATP6V0E1,BAX,NFKBIA,NFKBIB,PLAAT3,TCIRG1
Inhibition of ARE-Mediated mRNA Degradation Pathway	4.96	0.0926	1.633	PSMA2,PSMA4,PSMA7,PSMB1,PSMB4,PSMB5,PSMB6,PSMD8,PSME1,SEM1,TNFSF12,TNFSF13,YWHAB,YWHAH,ZFP36L2
Ephrin B Signaling	4.06	0.12	1.633	CAP1,CDC42,CFL1,GNAI2,GNB2,GNG5,HNRNPK,RAC1,RHOA
Gαi Signaling	1.94	0.06	1.633	ADORA3,ADRA2C,FPR1,GNAI2,GNB2,GNG5,P2RY12,P2RY13,RGS10
Pyroptosis Signaling Pathway	1.82	0.066	1.633	BAX,HMGB1,PYCARD,RHOA,TLR1,TLR9,TXNIP
Acute Phase Response Signaling	3.02	0.0674	1.342	C1QA,C1QB,C1QC,CEBPB,FTL,HAMP,HMOX1,HNRNPK,NFKBIA,NFKBIB,SERPINA1,SERPINF1,SERPING1
IL-10 Signaling	2.18	0.0617	1.265	ATF4,CCR1,DDIT4,HMOX1,IFNGR1,MAF,MAFB,NAD ,NFKBIA,NFKBIB
NOD1/2 Signaling Pathway	2.09	0.057	1.265	HSP90B1,HSPA8,MAP3K8,NFKBIA,NFKBIB,PYCARD,RAC1,TLR1,TLR9,TNFSF12,TNFSF13
Ferroptosis Signaling Pathway	3.61	0.0778	1.155	ARF1,ARF5,ARF6,ATF4,CTSB,FTH1,FTL,GPX4,H2AZ1,HMOX1,NFE2L2,SAT1,SLC3A2
Complement System	7.52	0.25	1.134	C1QA,C1QB,C1QBP,C1QC,C3AR1,C5AR1,CD59,CFD,ITGB2,SERPING1
cAMP-mediated signaling	1.75	0.049	1	ADORA3,ADRA2C,ATF4,CALM1,CALM2,FPR1,GNAI2,P2RY12,P2RY13,RGS10,RGS18,RGS2
Induction of Apoptosis by HIV1	2.95	0.106	0.816	BAX,CYC1,NFKBIA,NFKBIB,SLC25A3,SLC25A4,SLC25A5
ABRA Signaling Pathway	1.68	0.0682	0.816	ACTB,ACTG1,CFL1,ITGB1,PPP1CA,RHOA
Ephrin A Signaling	2.56	0.0699	0.707	ARF6,CDC42,CFL1,MYL12A,MYL12B,MYL6,PSENEN,RAC1,RHOA,RHOG
Protein Kinase A Signaling	2.57	0.049	0.632	ANAPC11,ATF4,CALM1,CALM2,GNAI2,GNB2,GNG5,H1-10,KDELR1,MYL12A,MYL12B,MYL6,NFKBIA,NFKBIB,PDIA3,PGP,PPP1CA,RHOA,YWHAB,YWHAH
Gap Junction Signaling	1.5	0.0409	0.535	ACTB,ACTG1,ATF4,CALM1,CALM2,GNAI2,HSPA8,NT5C,P2RY11,P2RY12,P2RY13,PDIA3,TUBA1B,TUBB,TUBB4B,VDAC1
Gαq Signaling	3.92	0.0791	0.447	CALM1,CALM2,CDC42,GNAI2,GNB2,GNG5,HMOX1,NFKBIA,NFKBIB,RAC1,RGS18,RGS2,RHOA,RHOG
Death Receptor Signaling	1.5	0.0619	0.447	ACTB,ACTG1,CYC1,NFKBIA,NFKBIB,TNFSF12
Polyamine Regulation in Colon Cancer	2.88	0.103	0.378	CSNK2B,DOHH,EIF5A,OAZ1,RHOA,SAT1,SLC3A2
Opioid Signaling Pathway	2.26	0.0515	0.302	AP2M1,AP2S1,ATF4,CALM1,CALM2,CDC42,CLTA,GNAI2,GNB2,GNG5,NFKBIA,RAC1,RGS10,RGS18,RGS19

## Sheet: Module 4
Ingenuity Canonical Pathways	-log(p-value)	Ratio	z-score	Molecules
Histone Modification Signaling Pathway	15.5	0.15	6.332	ASH1L,ATRX,BAZ1B,BAZ2A,BPTF,BRD1,BRD4,CARM1,CDK9,CHD4,DNMT3A,DOT1L,EHMT1,HDAC4,HDAC5,ING5,KAT2A,KAT6A,KDM2A,KDM2B,KDM3A,KDM3B,KDM4B,KDM5D,KDM7A,KMT2A,KMT2B,KMT2D,L3MBTL1,L3MBTL2,MAPK9,NSD2,PBRM1,PPARD,RIOX2,RNF20,RNF40,RPS6KA4,SETD1B,SETDB1,SMARCA4,TAF1,TRRAP,USP22,WDR5
Serotonin Receptor Signaling	2.5	0.0617	5.014	ADCY7,ARFGEF2,ARRB1,ARRB2,CACNA1A,CACNA1F,GNA15,GNB1,GNG7,JAK2,LCAT,MAPK14,MPRIP,MTOR,PAK3,PIK3CD,PIK3R5,PIK3R6,PLCB2,PLCG2,PLD2,PRKAG1,PRKAG2,PRKCD,PSD4,RHOT2,RPS6KB2,TGFB1,VWF
Estrogen Receptor Signaling	4.87	0.0803	4.747	ADCY7,CACNA1A,CACNA1F,CARM1,CCND1,CTBP1,CTBP2,DLG4,EIF2B5,GNA15,GNB1,GNG7,HSP90AA1,JAK2,LIMK1,MED12,MPRIP,MTOR,NCOR1,NCOR2,NDUFA9,NOTCH1,PIK3CD,PIK3R5,PIK3R6,PLCB2,PLCG2,PRKAG1,PRKAG2,PRKCD,RPS6KB2,TRRAP,TYK2
Molecular Mechanisms of Cancer	1.6	0.0488	4.743	ADCY7,ADGRF3,ARHGEF1,ARHGEF18,ARHGEF2,AXIN1,BCL2L1,BID,BRCA1,CCND1,CCND3,CSF2RB,CYSLTR1,GNA15,GNB1,GNG7,HDAC10,HDAC4,HDAC5,HDAC7,HDAC8,ITGAM,JAK2,LRP1,MAPK14,MAPK9,NAIP,NOTCH1,PAK3,PIK3CD,PIK3R5,PIK3R6,PLCB2,PRKAG1,PRKAG2,PRKCD,RAD50,RAPGEF1,RHOT2,SMAD7,TGFB1,TYK2
Eicosanoid Signaling	3.68	0.0816	4.69	ADCY7,AP1B1,ARRB1,ARRB2,CCND1,CYSLTR1,GNA15,GNB1,GNG7,LCAT,MAPK14,NFATC1,PIK3CD,PIK3R5,PIK3R6,PLCB2,PLCG2,PPARD,PRKAG1,PRKAG2,PRKCD,RPS6KA1,TBXAS1
Glutaminergic Receptor Signaling Pathway (Enhanced)	3.53	0.0767	4.6	ADCY7,CACNA1A,CACNA1F,DGKA,DGKD,DGKZ,GABRA3,IKBKB,IKBKG,LCAT,MAPK14,MTOR,PIK3CD,PIK3R5,PIK3R6,PLCB2,PLCG2,PLD2,PRKAG1,PRKAG2,PRKCD,RPS6KB2,RPTOR,SCN1B,TGFB1
Signaling by Rho Family GTPases	4.93	0.0936	4.472	ARHGEF1,ARHGEF18,ARHGEF2,BAIAP2,CDH4,CLIP1,CYFIP1,GNA15,GNB1,GNG7,ITGAM,LIMK1,MAP3K11,MAPK9,PAK3,PI4KA,PIK3CD,PIK3R5,PIK3R6,PIP4K2B,PIP5K1C,PKN1,RHOT2,SEPTIN8,SEPTIN9
IL-8 Signaling	4.73	0.101	4.472	ARRB2,BCL2L1,CCND1,CCND3,GNA15,GNB1,GNG7,IKBKB,IKBKG,IRAK1,ITGAM,LIMK1,MAPK9,MTOR,PIK3CD,PIK3R5,PIK3R6,PLCB2,PLD2,PRKCD,RHOT2
Insulin Secretion Signaling Pathway	3.75	0.0824	4.472	ADCY7,CACNA1A,CACNA1F,EIF2B5,EIF4G1,GNA15,JAK2,MAPK14,MTOR,PIK3CD,PIK3R5,PIK3R6,PLCB2,PLCG2,PRKAG1,PRKAG2,PRKCD,RPS6KB2,SLC2A5,STAT2,STAT5A,STAT6,TYK2
Oxytocin Signaling Pathway	3.61	0.0807	4.379	ARRB1,ARRB2,CACNA1A,CACNA1F,CAMKK2,GNB1,GNG7,MAPK14,MAPK9,MFN2,MPRIP,MYH9,MYO18A,NFATC1,PIK3CD,PIK3R5,PIK3R6,PLCB2,PPARD,PRKAG1,PRKAG2,PRKCD,SMARCC2
Orexin Signaling Pathway	2.94	0.0785	4.359	ADCY7,CACNA1A,CACNA1F,GNB1,GNG7,MAPK14,MTOR,PI4KA,PIK3CD,PIK3R5,PIK3R6,PIP4K2B,PIP5K1C,PLCB2,PLCG2,PRKAG1,PRKAG2,PRKCD,RPTOR
Synaptogenesis Signaling Pathway	2.32	0.0665	4.359	ADCY7,AP2A2,CDH4,DLG4,DNAJC5,EPHB2,ITSN2,LIMK1,LRP1,MAPK14,MTOR,PIK3CD,PIK3R5,PIK3R6,PLCG2,PRKAG1,PRKAG2,PRKCD,RAPGEF1,RPS6KB2,SGTA
Protein Sorting Signaling Pathway	4.06	0.0994	4.243	ADCY7,AP1B1,AP3D1,AP4E1,ARFGEF2,CTBP1,DNM2,GGA1,GGA2,GGA3,GOLGA1,GOLGA4,MIA3,PLD2,PRKAG1,PRKAG2,PSD4,SNX29
Cardiac Hypertrophy Signaling	3.75	0.0843	4.146	ADCY7,CACNA1A,CACNA1F,EIF2B5,GNA15,GNB1,GNG7,MAP3K11,MAP3K14,MAPK14,MAPK9,MTOR,PIK3CD,PIK3R5,PIK3R6,PLCB2,PLCG2,PRKAG1,PRKAG2,RHOT2,RPS6KA1,TGFB1
Pancreatic Secretion Signaling Pathway	2.19	0.07	4.123	ADCY7,ARHGEF1,ARHGEF18,ARHGEF2,MTOR,PIK3CD,PIK3R5,PIK3R6,PLCB2,PLCG2,PRKAG1,PRKAG2,PRKCD,RPS6KB2,RPTOR,SLC4A2,SLC6A6
IL-33 Signaling Pathway	2.76	0.0821	4	BCL2L1,IKBKB,IKBKG,IRAK1,JAK2,MAPK14,MAPK9,MTOR,NFATC1,PIK3CD,PIK3R5,PIK3R6,PLCG2,PRKAG1,PRKAG2,RPS6KA1
Protein Ubiquitination Pathway	1.37	0.0573	4	ANAPC4,BRCA1,DNAJC5,HSP90AA1,PAN2,SACS,UBA1,UBE2L3,UBE2O,UBE3B,USP22,USP36,USP4,USP48,USP7,USP8
Cardiac Hypertrophy Signaling (Enhanced)	4.28	0.0708	3.888	ADCY7,CACNA1A,CACNA1F,CSF2RB,DVL3,EIF2B5,FGFR1,GNA15,GNB1,GNG7,HDAC10,HDAC4,HDAC5,HDAC7,HDAC8,IKBKB,IKBKG,ITGAM,JAK2,MAP3K11,MAP3K14,MAPK14,MAPK9,MPPE1,MTOR,NFATC1,PIK3CD,PIK3R5,PIK3R6,PKN1,PLCB2,PLCG2,PRKAG1,PRKAG2,PRKCD,RPS6KB2,TGFB1,TSC2
Natural Killer Cell Signaling	2.2	0.0739	3.873	JAK2,LCP2,LIMK1,MAP3K11,MAP3K14,MAPK14,MTOR,NFATC1,PAK3,PIK3CD,PIK3R5,PIK3R6,PLCG2,TYK2,VAV1
Role of NFAT in Cardiac Hypertrophy	5.08	0.1	3.771	ADCY7,CABIN1,CACNA1A,CACNA1F,CAMK1D,GNB1,GNG7,HDAC10,HDAC4,HDAC5,HDAC7,HDAC8,MAPK14,MAPK9,PIK3CD,PIK3R5,PIK3R6,PLCB2,PLCG2,PRKAG1,PRKAG2,PRKCD,TGFB1
Role of Tissue Factor in Cancer	3.76	0.0913	3.771	ARRB1,ARRB2,BCL2L1,GNA15,IKBKB,IKBKG,JAK2,LIMK1,MAPK14,MAPK9,MTOR,PIK3CD,PIK3R5,PIK3R6,RPS6KA1,RPS6KA4,RPS6KB2,STAT5A,TGFB1
Pulmonary Fibrosis Idiopathic Signaling Pathway	1.35	0.0552	3.771	AXL,CCND1,FGFR1,JAK2,LATS2,MAPK14,MAPK9,MTOR,NOTCH1,PIK3CD,PIK3R5,PIK3R6,RPS6KA1,RPS6KA4,RPS6KB2,STAT6,TGFB1,TYK2
NGF Signaling	3.98	0.116	3.742	IKBKB,IKBKG,MAP3K11,MAP3K14,MAPK9,PIK3CD,PIK3R5,PIK3R6,PLCG2,PRKCD,RPS6KA1,RPS6KA4,RPS6KB2,SMPD4
Production of Nitric Oxide and Reactive Oxygen Species in Macrophages	2.42	0.0781	3.742	IKBKB,IKBKG,JAK2,MAP3K11,MAP3K14,MAPK14,MAPK9,PIK3CD,PIK3R5,PIK3R6,PLCG2,PRKCD,RHOT2,SIRPA,TYK2
Macrophage Alternative Activation Signaling Pathway	2.04	0.0729	3.742	JAK2,MAPK14,MTOR,PIK3CD,PIK3R5,PIK3R6,PPARD,RPS6KA1,RPS6KA4,RPTOR,SCARB1,STAT6,TGFB1,TYK2
Chronic Myeloid Leukemia Signaling	8.11	0.114	3.651	ADAR,AXIN1,BCL2L1,CCND1,CCND3,CTBP1,CTBP2,DVL3,HDAC10,HDAC4,HDAC5,HDAC7,HDAC8,HSP90AA1,IKBKB,IKBKG,JAK2,MTOR,NFATC1,NOTCH1,PIK3CD,PIK3R5,PIK3R6,PLCB2,PLCG2,PRKAG1,PRKAG2,RPTOR,STAT5A,TGFB1,ULK1,USP7
Senescence Pathway	2.56	0.0698	3.638	ANAPC4,CACNA1A,CACNA1F,CAPN3,CCND1,CCND3,CDC16,EP400,IKBKB,IKBKG,ITSN2,MAPK14,MTOR,NFATC1,PIK3CD,PIK3R5,PIK3R6,RAD50,RPS6KA4,SMAD7,TGFB1
Cyclophilin Signaling Pathway	2.09	0.0683	3.638	BCL2L1,CCND1,DDX42,JAK2,LRP1,MAPK14,MAPK9,NFATC1,PIK3CD,PIK3R5,PIK3R6,PPIL2,RAD50,SF3B1,STAT5A,TYK2,U2AF2
GNRH Signaling	2.4	0.0777	3.606	ADCY7,CACNA1A,CACNA1F,GNA15,GNB1,GNG7,MAP3K11,MAP3K14,MAPK14,MAPK9,PAK3,PLCB2,PRKAG1,PRKAG2,PRKCD
Ribonucleotide Reductase Signaling Pathway	2.02	0.0747	3.606	CCND1,MAPK14,MAPK9,MTOR,PARP14,PARP9,PBRM1,PIK3CD,PIK3R5,PIK3R6,RPTOR,SMARCA4,SMARCC2
Acetylcholine Receptor Signaling Pathway	1.59	0.0657	3.606	ADCY7,CACNA1A,CACNA1F,GNA15,JAK2,PIK3CD,PIK3R5,PIK3R6,PLCB2,PLCG2,PRKAG1,PRKAG2,PRKCD
ERK/MAPK Signaling	1.58	0.0636	3.606	ITGAM,KSR1,NFATC1,PAK3,PIK3CD,PIK3R5,PIK3R6,PLCG2,PRKAG1,PRKAG2,PRKCD,RAPGEF1,RPS6KA1,RPS6KA4
Hepatic Fibrosis Signaling Pathway	4.37	0.0769	3.53	AXIN1,BRD4,CACNA1A,CACNA1F,CCDC88A,CCND1,CSNK1D,CSNK1E,CSNK1G2,DVL3,FGFR1,IKBKB,IKBKG,IRAK1,ITGAM,JAK2,LRP1,MAPK14,MAPK9,MTOR,PIK3CD,PIK3R5,PIK3R6,PLCG2,PRKAG1,PRKAG2,PRKCD,RHOT2,RIPK1,RPS6KB2,SMAD7,TGFB1
Gαq Signaling	3.43	0.0947	3.5	BTK,GNA15,GNB1,GNG7,GRK2,IKBKB,IKBKG,NFATC1,PIK3CD,PIK3R5,PIK3R6,PLCB2,PLCG2,PLD2,PRKCD,RHOT2
Colorectal Cancer Metastasis Signaling	2.74	0.0738	3.5	ADCY7,ARRB1,AXIN1,BCL2L1,CCND1,GNA15,GNB1,GNG7,GRK2,JAK2,LRP1,MAPK9,PIK3CD,PIK3R5,PIK3R6,PRKAG1,PRKAG2,RHOT2,TGFB1,TYK2
Reelin Signaling in Neurons	3.38	0.101	3.464	ARHGEF1,ARHGEF10L,ARHGEF18,ARHGEF2,LIMK1,MAP3K11,MAP4K1,MAPK8IP3,MAPK9,MTOR,PIK3CD,PIK3R5,PIK3R6,RAPGEF1
RAC Signaling	2.9	0.0949	3.464	BAIAP2,CYFIP1,ITGAM,LIMK1,MAP3K11,MCF2L,PAK3,PI4KA,PIK3CD,PIK3R5,PIK3R6,PIP4K2B,PIP5K1C
NAD Signaling Pathway	2.1	0.0795	3.464	NADK,PARP14,PARP9,PIK3CD,PIK3R5,PIK3R6,PRKAG1,PRKAG2,SLC36A4,TGFB1,TPCN1,TRPM2
HIF1α Signaling	1.42	0.0619	3.464	CAMK1D,GPI,HK2,HSP90AA1,MTOR,PIK3CD,PIK3R5,PIK3R6,PLCG2,PRKCD,RPS6KB2,SLC2A5,TGFB1
Myelination Signaling Pathway	3.49	0.0762	3.4	ARHGAP4,AXIN1,CHD8,FGFR1,HDAC10,HDAC4,HDAC5,HDAC7,HDAC8,MBP,MTOR,NFATC1,NOTCH1,PIK3CD,PIK3R5,PIK3R6,PLCG2,PRKAG1,PRKAG2,RPS6KB2,RPTOR,SMAD7,SMARCA4,TSC1,TSC2
Renin-Angiotensin Signaling	2.86	0.0984	3.317	ADCY7,JAK2,MAPK14,MAPK9,PAK3,PIK3CD,PIK3R5,PIK3R6,PLCG2,PRKAG1,PRKAG2,PRKCD
Prostate Cancer Signaling	2.54	0.0948	3.317	CCND1,HDAC10,HDAC4,HDAC5,HDAC7,HDAC8,HSP90AA1,MTOR,PIK3CD,PIK3R5,PIK3R6
Virus Entry via Endocytic Pathways	2.43	0.0917	3.317	AP1B1,AP2A2,AP3D1,AP4E1,AP5Z1,DNM2,PIK3CD,PIK3R5,PIK3R6,PLCG2,PRKCD
IL-15 Production	2.37	0.0902	3.317	AATK,AXL,BTK,CLK2,EPHB2,FGFR1,JAK2,MAP3K11,ROR2,TNK2,TYK2
IL-13 Signaling Pathway	2.34	0.0894	3.317	BCL2L1,JAK2,MAPK14,MTOR,PIK3CD,PIK3R5,PIK3R6,PRKCD,STAT6,TGFB1,TYK2
G Beta Gamma Signaling	2.17	0.0846	3.317	BTK,CACNA1A,CACNA1F,DNM2,GNA15,GNB1,GNG7,PLCG2,PRKAG1,PRKAG2,PRKCD
P2Y Purinergic Receptor Signaling Pathway	2.07	0.0821	3.317	ADCY7,GNB1,GNG7,PIK3CD,PIK3R5,PIK3R6,PLCB2,PLCG2,PRKAG1,PRKAG2,PRKCD
Dopamine-DARPP32 Feedback in cAMP Signaling	1.59	0.0674	3.317	ADCY7,CACNA1A,CACNA1F,CAMKK2,CSNK1D,CSNK1E,CSNK1G2,PLCB2,PLCG2,PRKAG1,PRKAG2,PRKCD
Netrin Signaling	1.31	0.0629	3.317	CACNA1A,CACNA1F,MTOR,NFATC1,PIK3CD,PIK3R5,PIK3R6,PLCG2,PRKAG1,PRKAG2,PRKCD
RAR Activation	3.03	0.067	3.272	ADCY7,CARM1,CSF2RB,ERCC3,GNA15,GNB1,GTF2H1,JAK2,MAPK14,MAPK9,MPPE1,NCOR1,NCOR2,NFATC1,PBRM1,PIK3CD,PIK3R5,PIK3R6,PPARD,PRKAG1,PRKAG2,PRKCD,RAB11FIP3,RHOT2,SMARCA4,SMARCC2,STAT5A,TAF4,TGFB1
Regulation of the Epithelial Mesenchymal Transition by Growth Factors Pathway	2.01	0.0722	3.207	FGFR1,HSF1,IKBKB,IKBKG,JAK2,LATS2,MAPK14,MAPK9,MTOR,PIK3CD,PIK3R5,PIK3R6,TGFB1,TYK2
Pancreatic Adenocarcinoma Signaling	5.01	0.128	3.162	BCL2L1,CCND1,HDAC10,HDAC4,HDAC5,HDAC7,HDAC8,JAK2,MAPK9,NOTCH1,PIK3CD,PIK3R5,PIK3R6,PLD2,TGFB1,TYK2
Melanocyte Development and Pigmentation Signaling	3.1	0.111	3.162	ADCY7,PIK3CD,PIK3R5,PIK3R6,PLCG2,PRKAG1,PRKAG2,RPS6KA1,RPS6KA4,RPS6KB2,SH2B2
RANK Signaling in Osteoclasts	2.76	0.108	3.162	IKBKB,IKBKG,MAP3K11,MAP3K14,MAPK14,MAPK9,NFATC1,PIK3CD,PIK3R5,PIK3R6
HGF Signaling	2.14	0.084	3.162	CCND1,ITGAM,MAP3K11,MAP3K14,MAPK9,PIK3CD,PIK3R5,PIK3R6,PLCG2,PRKCD,RAPGEF1
GPCR-Mediated Nutrient Sensing in Enteroendocrine Cells	1.99	0.084	3.162	ADCY7,CACNA1A,CACNA1F,GNA15,GNG7,PLCB2,PLCG2,PRKAG1,PRKAG2,PRKCD
White Adipose Tissue Browning Pathway	1.57	0.0719	3.162	ADCY7,CACNA1A,CACNA1F,CAMKK2,CTBP1,CTBP2,FGFR1,MAPK14,PRKAG1,PRKAG2
AMPK Signaling	4.64	0.0943	3.153	CAMKK2,CCND1,GNA15,GNB1,GNG7,MAPK14,MTOR,PBRM1,PFKFB3,PFKFB4,PFKL,PIK3CD,PIK3R5,PIK3R6,PRKAG1,PRKAG2,RPTOR,SMARCA4,SMARCC2,STK11,TSC1,TSC2,ULK1
Glycation Signaling Pathway	2.52	0.0756	3.153	GPI,HK2,IKBKB,IKBKG,IRAK1,JAK2,MAPK14,MAPK9,MTOR,PFKL,PIK3CD,PIK3R5,PIK3R6,PRKCD,SCARB1,STAB1,TGFB1
Role of Macrophages, Fibroblasts and Endothelial Cells in Rheumatoid Arthritis	2.63	0.0682	3.128	AXIN1,CCND1,CSNK1D,CSNK1E,CSNK1G2,IKBKB,IKBKG,IRAK1,JAK2,LRP1,MAP3K14,MAPK14,MAPK9,NFATC1,PIK3CD,PIK3R5,PIK3R6,PLCB2,PLCG2,PRKCD,RIPK1,ROR2,TGFB1
Thrombin Signaling	3.37	0.0852	3.051	ADCY7,ARHGEF1,ARHGEF10L,ARHGEF18,ARHGEF2,CAMK1D,GNA15,GNB1,GNG7,IKBKB,MAPK14,MPRIP,PIK3CD,PIK3R5,PIK3R6,PLCB2,PLCG2,PRKCD,RHOT2
CNTF Signaling	3.83	0.161	3	JAK2,MTOR,PIK3CD,PIK3R5,PIK3R6,RPS6KA1,RPS6KA4,RPS6KB2,TYK2
Growth Hormone Signaling	3.6	0.137	3	JAK2,PIK3CD,PIK3R5,PIK3R6,PLCG2,PRKCD,RPS6KA1,RPS6KA4,RPS6KB2,STAT5A
JAK/STAT Signaling	3.14	0.12	3	BCL2L1,JAK2,MTOR,PIK3CD,PIK3R5,PIK3R6,STAT2,STAT5A,STAT6,TYK2
DNA Methylation and Transcriptional Repression Signaling	3.14	0.112	3	CDK11B,CDK12,CDK9,CHD4,DNMT1,DNMT3A,ERCC5,GATAD2A,MTA1,TCF20,TCF25
LPS-stimulated MAPK Signaling	2.49	0.106	3	IKBKB,IKBKG,MAP3K14,MAPK14,MAPK9,PIK3CD,PIK3R5,PIK3R6,PRKCD
PDGF Signaling	2.42	0.103	3	INPP5D,INPPL1,JAK2,OCRL,PIK3CD,PIK3R5,PIK3R6,PLCG2,TYK2
ERBB Signaling	2.23	0.0968	3	MAPK14,MAPK9,MTOR,PAK3,PIK3CD,PIK3R5,PIK3R6,PLCG2,PRKCD
Neuropathic Pain Signaling in Dorsal Horn Neurons	2	0.0891	3	CAMK1D,PIK3CD,PIK3R5,PIK3R6,PLCB2,PLCG2,PRKAG1,PRKAG2,PRKCD
Aldosterone Signaling in Epithelial Cells	1.71	0.0702	3	DNAJC5,HSP90AA1,PI4KA,PIK3CD,PIK3R5,PIK3R6,PIP4K2B,PIP5K1C,PLCB2,PLCG2,PRKCD,SACS
IL-6 Signaling	1.38	0.0698	3	IKBKB,IKBKG,JAK2,MAP3K14,MAPK14,MAPK9,PIK3CD,PIK3R5,PIK3R6
Docosahexaenoic Acid (DHA) Signaling	2.76	0.0757	2.982	ADCY7,BCL2L1,BID,CCND1,LCAT,MTOR,PIK3CD,PIK3R5,PIK3R6,PLCB2,PLCG2,PRKAG1,PRKAG2,PRKCD,RPS6KB2,RPTOR,SPTB,TGFB1,ULK1
Endocannabinoid Developing Neuron Pathway	3.72	0.109	2.887	ADCY7,BRCA1,CCND1,GNB1,GNG7,MAPK14,MAPK9,MTOR,PIK3CD,PIK3R5,PIK3R6,PRKAG1,PRKAG2,RPTOR
HEY1 Signaling Pathway	1.89	0.0745	2.887	NCOR1,NCOR2,NELFB,NFATC1,NOTCH1,PIK3CD,PIK3R5,PIK3R6,PRKAG1,PRKAG2,SMAD7,TGFB1
Actin Cytoskeleton Signaling	1.87	0.0661	2.887	ARHGEF1,BAIAP2,CYFIP1,FGD3,ITGAM,LIMK1,MPRIP,MYH9,MYO18A,NCKAP1L,PAK3,PIK3CD,PIK3R5,PIK3R6,PIP5K1C,VAV1
Integrin Signaling	1.42	0.0619	2.887	CAPN3,ITGAM,MAP3K11,MPRIP,PAK3,PARVB,PIK3CD,PIK3R5,PIK3R6,PLCG2,RAPGEF1,RHOT2,TNK2
Endothelin-1 Signaling	1.34	0.0619	2.887	ADCY7,GNA15,LCAT,MAPK14,MAPK9,PIK3CD,PIK3R5,PIK3R6,PLCB2,PLCG2,PLD2,PRKCD
UVA-Induced MAPK Signaling	5.71	0.153	2.828	BCL2L1,MAPK14,MAPK9,MTOR,PARP14,PARP9,PIK3CD,PIK3R5,PIK3R6,PLCB2,PLCG2,RPS6KA1,RPS6KA4,RPS6KB2,SMPD4
MicroRNA Biogenesis Signaling Pathway	3.88	0.0963	2.828	ADAR,BRCA1,DDX17,DGCR8,EWSR1,EXOSC10,FUS,GLE1,HSP90AA1,ILF3,MAPK14,MTOR,NUP85,PIK3CD,PIK3R5,PIK3R6,TGFB1,TPR
Ovarian Cancer Signaling	3.73	0.101	2.828	ARRB1,AXIN1,BRCA1,CCND1,HDAC10,HDAC4,HDAC5,HDAC7,HDAC8,MTOR,PIK3CD,PIK3R5,PIK3R6,PRKAG1,PRKAG2,RPS6KB2
IL-1 Signaling	3.72	0.122	2.828	ADCY7,GNA15,GNB1,GNG7,IKBKB,IKBKG,IRAK1,MAP3K14,MAPK14,MAPK9,PRKAG1,PRKAG2
Role of JAK family kinases in IL-6-type Cytokine Signaling	2.63	0.111	2.828	BCL2L1,CCND1,HSP90AA1,JAK2,MAPK14,MAPK9,STAT5A,TGFB1,TYK2
NF-κB Activation by Viruses	2.19	0.103	2.828	IKBKB,IKBKG,MAP3K14,PIK3CD,PIK3R5,PIK3R6,PRKCD,RIPK1
Relaxin Signaling	1.62	0.0705	2.828	ADCY7,GNA15,GNB1,GNG7,MPPE1,PIK3CD,PIK3R5,PIK3R6,PRKAG1,PRKAG2,SMARCC2
Nitric Oxide Signaling in the Cardiovascular System	1.56	0.075	2.828	CACNA1A,CACNA1F,HSP90AA1,PIK3CD,PIK3R5,PIK3R6,PRKAG1,PRKAG2,PRKCD
Mouse Embryonic Stem Cell Pluripotency	1.51	0.0777	2.828	AXIN1,DVL3,JAK2,MAPK14,PIK3CD,PIK3R5,PIK3R6,TYK2
fMLP Signaling in Neutrophils	1.31	0.0677	2.828	GNA15,GNB1,GNG7,NFATC1,PIK3CD,PIK3R5,PIK3R6,PLCB2,PRKCD
CXCR4 Signaling	1.76	0.0714	2.714	ADCY7,GNA15,GNB1,GNG7,MAPK9,PAK3,PIK3CD,PIK3R5,PIK3R6,PLCB2,PRKCD,RHOT2
Transcriptional Regulatory Network in Embryonic Stem Cells	1.48	0.0671	2.714	FGFR1,JAK2,KAT6A,PIK3CD,PIK3R5,PIK3R6,RIF1,SETDB1,TGFB1,TYK2,ZFHX3
Huntington's Disease Signaling	4.85	0.0906	2.673	AP2A2,BCL2L1,CAPN3,DLG4,DNAJC5,DNM2,GNA15,GNB1,GNG7,HDAC10,HDAC4,HDAC5,HDAC7,HDAC8,HTT,MAPK9,MTOR,NCOR1,NCOR2,PIK3CD,PIK3R5,PIK3R6,PLCB2,PRKCD,TAF4,TCERG1
Glioma Signaling	3.72	0.109	2.646	CAMK1D,CCND1,CCND3,HDAC10,HDAC4,HDAC5,HDAC7,HDAC8,MTOR,PIK3CD,PIK3R5,PIK3R6,PLCG2,PRKCD
TNFR1 Signaling	3.33	0.154	2.646	BID,IKBKB,IKBKG,MADD,MAP3K14,NAIP,PAK3,RIPK1
Sperm Motility	3.02	0.0778	2.646	AATK,AXL,BTK,CLK2,EPHB2,FGFR1,GNA15,GNB1,GNG7,JAK2,LCAT,MAP3K11,PLCB2,PLCG2,PRKAG1,PRKAG2,PRKCD,ROR2,TNK2,TYK2
UVB-Induced MAPK Signaling	2.53	0.13	2.646	MAPK14,MAPK9,MTOR,PIK3CD,PIK3R5,PIK3R6,PRKCD
ATM Signaling	2.52	0.1	2.646	BID,BRAT1,BRCA1,MAPK14,MAPK9,RAD50,SMC1A,TOPBP1,TRRAP,USP7
CCR3 Signaling in Eosinophils	2.46	0.0882	2.646	GNA15,GNB1,GNG7,LIMK1,MAPK14,MPRIP,PAK3,PIK3CD,PIK3R5,PIK3R6,PLCB2,PRKCD
IL-7 Signaling Pathway	2.15	0.101	2.646	CCND1,CCND3,MAPK14,NFATC1,PIK3CD,PIK3R5,PIK3R6,STAT5A
IL-17A Signaling in Fibroblasts	1.62	0.0875	2.646	ARID5A,IKBKB,IKBKG,JAK2,MAPK14,MAPK9,TGFB1
Paxillin Signaling	1.45	0.0755	2.646	GIT2,ITGAM,MAPK14,MAPK9,PAK3,PIK3CD,PIK3R5,PIK3R6
FLT3 Signaling in Hematopoietic Progenitor Cells	3.82	0.134	2.53	INPP5D,MAPK14,MTOR,PIK3CD,PIK3R5,PIK3R6,RPS6KA1,RPS6KA4,STAT2,STAT5A,STAT6
Th2 Pathway	1.91	0.078	2.53	CHD4,JAK2,NOTCH1,PIK3CD,PIK3R5,PIK3R6,STAT5A,STAT6,TGFB1,TYK2,VAV1
Gα12/13 Signaling	1.66	0.0746	2.53	ARHGEF1,BTK,CDH4,IKBKB,IKBKG,MAPK9,PIK3CD,PIK3R5,PIK3R6,VAV1
Spliceosomal Cycle	2.58	0.132	2.449	DDX39B,DDX42,DDX46,DHX38,EFTUD2,SF3B1,U2AF2
Lymphotoxin β Receptor Signaling	2.49	0.127	2.449	BCL2L1,IKBKB,IKBKG,MAP3K14,PIK3CD,PIK3R5,PIK3R6
April Mediated Signaling	2.45	0.143	2.449	IKBKB,IKBKG,MAP3K14,MAPK14,MAPK9,NFATC1
B Cell Activating Factor Signaling	2.4	0.14	2.449	IKBKB,IKBKG,MAP3K14,MAPK14,MAPK9,NFATC1
Ephrin B Signaling	2.36	0.11	2.449	AXIN1,EPHB2,GNA15,GNB1,GNG7,ITSN2,LIMK1,VAV1
Thrombopoietin Signaling	2.12	0.109	2.449	JAK2,PIK3CD,PIK3R5,PIK3R6,PLCG2,PRKCD,STAT5A
iNOS Signaling	2.12	0.122	2.449	IKBKB,IKBKG,IRAK1,JAK2,MAPK14,TYK2
GM-CSF Signaling	1.92	0.1	2.449	BCL2L1,CCND1,CSF2RB,JAK2,PIK3CD,PIK3R5,PIK3R6
Acute Myeloid Leukemia Signaling	1.77	0.087	2.449	CCND1,CSF2RB,MTOR,PIK3CD,PIK3R5,PIK3R6,RPS6KB2,STAT5A
CLEAR Signaling Pathway	2.84	0.0737	2.4	CLCN7,CTNS,FGFR1,FLCN,GALNS,HEXA,HPS1,IKBKB,MAPK14,MAPK9,MTOR,NPRL3,PRKAG1,PRKAG2,PRKCD,RPTOR,STK11,TFEB,TGFB1,TSC1,TSC2
IL-17A Signaling in Airway Cells	3.18	0.132	2.333	IKBKB,IKBKG,JAK2,MAPK14,MAPK9,PIK3CD,PIK3R5,PIK3R6,TYK2
Death Receptor Signaling	2.62	0.103	2.333	ACIN1,BID,IKBKB,IKBKG,LIMK1,MAP3K14,NAIP,PARP14,PARP9,RIPK1
mRNA 3 Prime End Processing Signaling Pathway	2.46	0.098	2.333	BRCA1,CNOT10,CPSF1,EIF4G1,EXOSC10,FUS,PCBP4,RBBP6,SRRM1,SYMPK
Apelin Cardiomyocyte Signaling Pathway	2.03	0.09	2.333	MAPK14,MAPK9,PIK3CD,PIK3R5,PIK3R6,PLCB2,PLCG2,PRKCD,TGFB1
Hereditary Breast Cancer Signaling	2.41	0.087	2.309	BRCA1,CCND1,CCND3,FANCA,FANCC,NELFB,PALB2,PIK3CD,PIK3R5,PIK3R6,RAD50,TGFB1
HER-2 Signaling in Breast Cancer	1.79	0.0661	2.309	CCND1,GLE1,IKBKB,IKBKG,MTOR,NUP85,PIK3CD,PIK3R5,PIK3R6,PRKCD,RPS6KB2,RPTOR,TPR,TSC1,TSC2
Telomerase Signaling	2.28	0.0926	2.236	HDAC10,HDAC4,HDAC5,HDAC7,HDAC8,HSP90AA1,PIK3CD,PIK3R5,PIK3R6,TEP1
4-1BB Signaling in T Lymphocytes	2.18	0.147	2.236	IKBKB,IKBKG,MAP3K14,MAPK14,MAPK9
IL-23 Signaling Pathway	1.63	0.109	2.236	JAK2,PIK3CD,PIK3R5,PIK3R6,TYK2
ERB2-ERBB3 Signaling	1.58	0.0938	2.236	CCND1,PIK3CD,PIK3R5,PIK3R6,STAT5A,TYK2
Role of JAK1 and JAK3 in γc Cytokine Signaling	1.44	0.087	2.236	JAK2,PIK3CD,PIK3R5,PIK3R6,STAT5A,STAT6
EGF Signaling	1.31	0.0893	2.236	MAPK14,MTOR,PIK3CD,PIK3R5,PIK3R6
Small Cell Lung Cancer Signaling	5.71	0.153	2.121	BCL2L1,BID,CCND1,CCND3,FHIT,HDAC10,HDAC4,HDAC5,HDAC7,HDAC8,IKBKB,IKBKG,PIK3CD,PIK3R5,PIK3R6
IL-3 Signaling	3.23	0.123	2.121	CSF2RB,INPP5D,JAK2,PIK3CD,PIK3R5,PIK3R6,PRKCD,RAPGEF1,STAT5A,STAT6
CD40 Signaling	2.59	0.119	2.121	IKBKB,IKBKG,MAP3K14,MAPK14,MAPK9,PIK3CD,PIK3R5,PIK3R6
Calcium Signaling	2.29	0.0734	2.121	CABIN1,CACNA1A,CACNA1F,CAMK1D,CAMKK2,HDAC10,HDAC4,HDAC5,HDAC7,HDAC8,MYH9,MYO18A,NFATC1,PRKAG1,PRKAG2,TPM2
Regulation of Actin-based Motility by Rho	1.75	0.0811	2.121	BAIAP2,ITGAM,LIMK1,MPRIP,PAK3,PI4KA,PIP4K2B,PIP5K1C,RHOT2
Type II Diabetes Mellitus Signaling	2.96	0.0921	2.111	CACNA1A,CACNA1F,IKBKB,IKBKG,MAP3K14,MAPK9,MTOR,PIK3CD,PIK3R5,PIK3R6,PRKAG1,PRKAG2,PRKCD,SMPD4
RHOA Signaling	2.34	0.0894	2.111	ARHGAP4,ARHGEF1,BAIAP2,LIMK1,MPRIP,PI4KA,PIP4K2B,PIP5K1C,PKN1,SEPTIN8,SEPTIN9
TR/RXR Activation	2.14	0.084	2.111	CCND1,MBP,MTOR,NCOR1,NCOR2,PIK3CD,PIK3R5,PIK3R6,PPARD,RPS6KB2,SCARB1
Glioblastoma Multiforme Signaling	2.08	0.076	2.111	AXIN1,CCND1,CCND3,MTOR,PIK3CD,PIK3R5,PIK3R6,PLCB2,PLCG2,PRKCD,RHOT2,TSC1,TSC2
Opioid Signaling Pathway	2.92	0.0747	2.065	ADCY7,AP2A2,ARRB1,ARRB2,CACNA1A,CACNA1F,CAMK1D,GNA15,GNB1,GNG7,GRK2,GRK5,PLD2,PRKAG1,PRKAG2,PRKCD,RGS12,RGS14,RPS6KA1,RPS6KA4,RPS6KB2
DNA Double-Strand Break Repair by Homologous Recombination	2.92	0.286	2	ATRX,BRCA1,RAD50,RAD52
Leptin Signaling in Obesity	2.79	0.117	2	ADCY7,JAK2,PIK3CD,PIK3R5,PIK3R6,PLCB2,PLCG2,PRKAG1,PRKAG2
Apelin Endothelial Signaling Pathway	4.21	0.11	1.941	ADCY7,GNA15,GNB1,GNG7,HDAC4,HDAC5,MAPK9,MTOR,PIK3CD,PIK3R5,PIK3R6,PLCB2,PRKAG1,PRKAG2,PRKCD,RPS6KB2
Fc Epsilon RI Signaling	3.45	0.108	1.941	BTK,INPP5D,INPPL1,LCP2,MAPK14,MAPK9,OCRL,PIK3CD,PIK3R5,PIK3R6,PLCG2,PRKCD,VAV1
Leukocyte Extravasation Signaling	1.66	0.067	1.941	ARHGAP4,BTK,ITGAM,MAPK14,MAPK9,PIK3CD,PIK3R5,PIK3R6,PLCG2,PRKCD,SIPA1,TIMP2,VAV1
NAP1L1 Transcription Regulation Signaling Pathway	2.9	0.112	1.897	CCND1,DGKZ,ERCC6,MTOR,MYH9,PIK3CD,PIK3R5,PIK3R6,SCARB1,UBR4
CD27 Signaling in Lymphocytes	2.44	0.125	1.89	BCL2L1,BID,IKBKB,IKBKG,MAP3K11,MAP3K14,MAPK9
NER (Nucleotide Excision Repair, Enhanced Pathway)	1.36	0.0769	1.89	ERCC3,ERCC5,ERCC6,ERCC8,GPS1,GTF2H1,USP7
Autism Signaling Pathway	1.81	0.0615	1.886	AXIN1,CACNA1A,CACNA1F,CAMKK2,CHD8,CYFIP1,DVL3,MTOR,PIK3CD,PIK3R5,PIK3R6,PRKAG1,PRKAG2,RAI1,RPS6KA1,RPTOR,TGFB1,TSC1,TSC2
Ephrin A Signaling	2.36	0.0857	1.732	JAK2,LIMK1,NFATC1,PIK3CD,PIK3R5,PIK3R6,PLCG2,PRKAG1,PRKAG2,TGFB1,TSC2,VAV1
Endocannabinoid Neuronal Synapse Pathway	2.12	0.08	1.732	ADCY7,CACNA1A,CACNA1F,GNA15,GNB1,GNG7,MAPK14,MAPK9,PLCB2,PLCG2,PRKAG1,PRKAG2
Role of PKR in Interferon Induction and Antiviral Response	1.59	0.0725	1.667	BID,FANCC,HSP90AA1,IKBKB,IKBKG,MAPK14,MAPK9,NLRP1,STAT2,TYK2
Role of JAK2 in Hormone-like Cytokine Signaling	3.33	0.138	1.633	BCL2L1,CCND1,CCND3,JAK2,SH2B1,SH2B3,SIRPA,STAT5A,TYK2
Androgen Signaling	2.39	0.08	1.633	CACNA1A,CACNA1F,CCND1,ERCC3,GNA15,GNB1,GNG7,GTF2H1,HSP90AA1,PRKAG1,PRKAG2,PRKCD,TAF1,TAF4
Apelin Pancreas Signaling Pathway	2.25	0.13	1.633	MAPK9,PIK3CD,PIK3R5,PIK3R6,PRKAG1,PRKAG2
PFKFB4 Signaling Pathway	2.12	0.122	1.633	GPI,HK2,PFKFB4,PRKAG1,PRKAG2,TGFB1
Cardiac β-adrenergic Signaling	2.1	0.0765	1.633	ADCY7,AKAP17A,AKAP9,CACNA1A,CACNA1F,GNA15,GNB1,GNG7,GRK2,MPPE1,PKIB,PRKAG1,PRKAG2
Amyotrophic Lateral Sclerosis Signaling	1.62	0.0769	1.633	BCL2L1,BID,CACNA1A,CACNA1F,CAPN3,NAIP,PIK3CD,PIK3R5,PIK3R6
Activation of IRF by Cytosolic Pattern Recognition Receptors	1.53	0.0909	1.633	ADAR,IKBKB,IKBKG,MAPK9,RIPK1,STAT2
WNK Renal Signaling Pathway	1.43	0.0748	1.633	ANAPC4,BRCA1,MAPK14,PIK3CD,PIK3R5,PIK3R6,PRKCD,SLC12A7
Autophagy	3.47	0.0868	1.606	CAMKK2,MAPK9,MTOR,PIK3CD,PIK3R5,PIK3R6,PRKAG1,PRKAG2,RB1CC1,RIPK1,RPTOR,STK11,TFEB,TGFB1,TSC1,TSC2,ULK1,VPS16,VPS39
Cachexia Signaling Pathway	1.38	0.0543	1.606	ADCY7,CAPN3,EIF2B5,HSP90AA1,IKBKB,IKBKG,MAPK14,MAPK9,MFN2,MTOR,PIK3CD,PIK3R5,PIK3R6,PRKAG1,PRKAG2,PRKCD,STAT2,STAT5A,STAT6,TGFB1
14-3-3-mediated Signaling	2.12	0.0833	1.508	MAPK9,PIK3CD,PIK3R5,PIK3R6,PLCB2,PLCG2,PRKCD,RPS6KA1,STK11,TSC1,TSC2
Role of Chondrocytes in Rheumatoid Arthritis Signaling Pathway	1.85	0.0764	1.508	CAMKK2,IRAK1,JAK2,LRP1,MAPK14,MAPK9,MTOR,PRKAG1,PRKAG2,RIPK1,RPTOR
mTOR Signaling	4.06	0.0935	1.414	DGKZ,EIF3A,EIF4G1,MTOR,PIK3CD,PIK3R5,PIK3R6,PLD2,PRKAG1,PRKAG2,PRKCD,RHOT2,RPS6KA1,RPS6KA4,RPS6KB2,RPTOR,STK11,TSC1,TSC2,ULK1
PEDF Signaling	2	0.0952	1.414	ARHGAP22,BCL2L1,IKBKB,IKBKG,MAPK14,PIK3CD,PIK3R5,PIK3R6
Protein Kinase A Signaling	1.33	0.053	1.414	ADCY7,AKAP17A,AKAP9,ANAPC4,CDC16,DUSP22,GNB1,GNG7,MPPE1,NFATC1,PLCB2,PLCG2,PRKAG1,PRKAG2,PRKCD,PTPN23,PTPRE,PTPRJ,PYGB,SIRPA,TGFB1
Role of Osteoblasts in Rheumatoid Arthritis Signaling Pathway	1.31	0.0583	1.387	AXIN1,CSNK1D,CSNK1E,CSNK1G2,JAK2,LRP1,PIK3CD,PIK3R5,PIK3R6,STAT2,STAT5A,STAT6,TGFB1,TYK2
Non-Small Cell Lung Cancer Signaling	3.21	0.115	1.342	CCND1,CCND3,FHIT,HDAC10,HDAC4,HDAC5,HDAC7,HDAC8,PIK3CD,PIK3R5,PIK3R6
TWEAK Signaling	2.68	0.158	1.342	BID,IKBKB,IKBKG,MAP3K14,NAIP,RIPK1
CSDE1 Signaling Pathway	1.31	0.0893	1.342	CCND3,CDK11B,FUS,PTBP1,TGFB1
PI3K/AKT Signaling	3.07	0.085	1.291	BCL2L1,CCND1,CSF2RB,HSP90AA1,IKBKB,IKBKG,INPP5D,INPPL1,ITGAM,JAK2,MTOR,OCRL,PIK3CD,RPS6KB2,TSC1,TSC2,TYK2
WNT/β-catenin Signaling	2.04	0.0751	1.265	APPL2,AXIN1,CCND1,CSNK1D,CSNK1E,CSNK1G2,DVL3,LRP1,MAP4K1,MARK2,PPARD,TGFB1,TLE3
Hepatitis B Chronic Liver Pathogenesis Signaling Pathway	3.37	0.0904	1.213	AP1B1,CAMKK2,DNMT1,HSF1,IKBKB,IKBKG,MAPK9,MYH9,PIK3CD,PIK3R5,PIK3R6,PRKCD,SMAD7,STAT2,TGFB1,TYK2,ZHX2
Induction of Apoptosis by HIV1	2.64	0.121	1.134	BCL2L1,BID,IKBKB,IKBKG,MAP3K14,MAPK9,NAIP,RIPK1
Role of BRCA1 in DNA Damage Response	2.67	0.113	1	BRCA1,BRCC3,FANCA,FANCC,PBRM1,RAD50,SMARCA4,SMARCC2,TOPBP1
Mitotic Roles of Polo-Like Kinase	1.5	0.0896	1	ANAPC4,CDC16,HSP90AA1,PLK3,SMC1A,TGFB1
IL-10 Signaling	2.02	0.0774	0.905	BCL2L1,CCND1,IKBKB,IKBKG,INPP5D,MAP3K14,MAPK14,MTOR,PRKAG1,PRKAG2,STAT5A,TYK2
GADD45 Signaling	1.71	0.1	0.816	BRCA1,CCND1,CCND3,MAPK14,MAPK9,TGFB1
Insulin Receptor Signaling	4.84	0.124	0.775	EIF2B5,INPP5D,INPPL1,JAK2,MTOR,OCRL,PIK3CD,PIK3R5,PIK3R6,PRKAG1,PRKAG2,RAPGEF1,RPS6KB2,RPTOR,TSC1,TSC2
NAFLD Signaling Pathway	1.83	0.067	0.775	IKBKB,IKBKG,JAK2,MAPK9,MLXIPL,MTOR,PIK3CD,PIK3R5,PIK3R6,PRKAG1,PRKAG2,RPTOR,TGFB1,TYK2,ULK1
Dilated Cardiomyopathy Signaling Pathway	1.36	0.0662	0.707	ADCY7,CACNA1A,CACNA1F,CAMK1D,MAPK14,MTOR,MYH9,MYO18A,PRKAG1,PRKAG2

## Sheet: Module 5
Ingenuity Canonical Pathways	-log(p-value)	Ratio	z-score	Molecules
Role of Macrophages, Fibroblasts and Endothelial Cells in Rheumatoid Arthritis	4.55	0.0237	2.828	CXCL8,IL1B,IRAK2,MAPKAPK2,NFKBID,PDGFB,STAT3,TNFRSF1B
Cardiac Hypertrophy Signaling (Enhanced)	3.16	0.0149	2.646	CXCL8,IL1B,MAPKAPK2,MEF2D,PDE4B,RELB,STAT3,TNFRSF1B
Hepatic Fibrosis Signaling Pathway	6.54	0.0264	2.53	CXCL8,IL1B,IRAK2,NFKBID,PDGFB,RELB,RHOJ,SPP1,STAT3,TFRC,TNFRSF1B
IL-6 Signaling	6.38	0.0543	2.449	CXCL8,IL1B,MAPKAPK2,NFKBID,RELB,STAT3,TNFRSF1B
Hepatic Cholestasis	3.8	0.0267	2.449	CXCL8,IL1B,IRAK2,NFKBID,RELB,TNFRSF1B
mRNA 3 Prime End Processing Signaling Pathway	4.48	0.049	2.236	EIF4G2,PCBP2,PCF11,PPP1R10,TUT7
Tumor Microenvironment Pathway	4.33	0.0333	2.236	CXCL8,IL1B,PDGFB,RELB,SPP1,STAT3
p38 MAPK Signaling	4.08	0.0403	2.236	IL1B,IRAK2,MAPKAPK2,MEF2D,TNFRSF1B
Role of Chondrocytes in Rheumatoid Arthritis Signaling Pathway	3.77	0.0347	2.236	CXCL8,EGR1,IL1B,STAT3,TNFRSF1B
Glycation Signaling Pathway	2.89	0.0222	2.236	CXCL8,EGR1,IL1B,IRAK2,STAT3
Role of Osteoclasts in Rheumatoid Arthritis Signaling Pathway	2.25	0.0158	2.236	IL1B,NFKBID,RHOJ,SPP1,TNFRSF1B
Pulmonary Fibrosis Idiopathic Signaling Pathway	2.2	0.0153	2.236	EGR1,IL1B,PDGFB,RELB,STAT3
IL-17A Signaling in Fibroblasts	3.71	0.05	2	IL1B,NFKBID,RELB,STAT3
HMGB1 Signaling	3.56	0.0312	2	CXCL8,IL1B,RELB,RHOJ,TNFRSF1B
Regulation of the Epithelial Mesenchymal Transition by Growth Factors Pathway	3.18	0.0258	2	EGR1,PDGFB,RELB,STAT3,TNFRSF1B
Neuroinflammation Signaling Pathway	2.92	0.0182	2	CD80,CXCL8,GLUL,IL1B,IRAK2,RELB
Osteoarthritis Pathway	2.78	0.021	2	CXCL8,IL1B,RELB,SPP1,TNFRSF1B
Sheddase Signaling Pathway	2.21	0.0196	2	ETS2,IL1B,PDGFB,RELB
Role of Tissue Factor in Cancer	2.18	0.0192	2	CXCL8,EGR1,IL1B,TNFRSF1B
NAFLD Signaling Pathway	2.07	0.0179	2	CXCL8,IL1B,STAT3,TNFRSF1B
Pathogen Induced Cytokine Storm Signaling Pathway	1.92	0.0131	2	CD163,CXCL8,IL1B,STAT3,TNFRSF1B
Chronic Myeloid Leukemia Signaling	1.74	0.0142	2	PCBP2,RELB,SPP1,STAT3
Irritable Bowel Syndrome Signaling Pathway	1.7	0.0138	2	CXCL8,IL1B,RHOJ,STAT3
Cachexia Signaling Pathway	1.37	0.0109	2	CXCL8,IL1B,STAT3,TNFRSF1B
G-Protein Coupled Receptor Signaling	1.37	0.00842	1.633	ADGRE5,MEF2D,NFKBID,PDE4B,RELB,STAT3
Hepatitis B Chronic Liver Pathogenesis Signaling Pathway	3.24	0.0266	1.342	AP1G1,DDX3X,EGR1,IL1B,STAT3
IL-33 Signaling Pathway	3.17	0.0256	1.342	CXCL8,IL1B,MAPKAPK2,NFKBID,STAT3
Coronavirus Pathogenesis Pathway	3.01	0.0237	1.342	CXCL8,IL1B,NFKBID,RELB,STAT3
Wound Healing Signaling Pathway	2.7	0.0201	1.342	CXCL8,IL1B,NFKBID,PDGFB,TNFRSF1B
Cyclophilin Signaling Pathway	2.7	0.0201	1.342	CXCL8,IL1B,NFKBID,SPP1,STAT3
Role of PKR in Interferon Induction and Antiviral Response	3.86	0.0362	1	IL1B,NFKBID,PDGFB,RELB,STAT3
Acute Phase Response Signaling	3.21	0.0262	1	IL1B,NFKBID,RELB,STAT3,TNFRSF1B
Ferroptosis Signaling Pathway	2.83	0.0292	1	SLC11A2,SREBF2,STAT3,TFRC
Macrophage Alternative Activation Signaling Pathway	2.3	0.0208	1	IL1B,NFKBID,RELB,STAT3
NOD1/2 Signaling Pathway	2.29	0.0207	1	CXCL8,IL1B,MAPKAPK2,NFKBID
HER-2 Signaling in Breast Cancer	2.05	0.0176	1	ETS2,NFKBID,RELB,STAT3
Parkinson's Signaling Pathway	1.57	0.0127	1	ATP6V0A1,CXCL8,IL1B,SLC11A2
Production of Nitric Oxide and Reactive Oxygen Species in Macrophages	4.18	0.0312	0.447	ARG2,NFKBID,PPP1R10,RELB,RHOJ,TNFRSF1B
Macrophage Classical Activation Signaling Pathway	3.24	0.0266	0.447	CD80,CXCL8,IL1B,NFKBID,STAT3

## Sheet: Module 6
Ingenuity Canonical Pathways	-log(p-value)	Ratio	z-score	Molecules
Glutaminergic Receptor Signaling Pathway (Enhanced)	3.17	0.0215	2.646	GNAQ,GUCY1A1,NR3C1,PLCL2,PPP3CA,PRKACB,VTI1A
Dopamine-DARPP32 Feedback in cAMP Signaling	2.9	0.0281	2.236	GNAQ,GUCY1A1,PLCL2,PPP3CA,PRKACB
Autophagy	2.51	0.0228	2.236	GSK3B,PPP3CA,PRKACB,PTEN,UVRAG
Orexin Signaling Pathway	2.33	0.0207	2.236	GNAQ,GUCY1A1,PLCL2,PRKACB,SLC8A1
Pancreatic Secretion Signaling Pathway	2.32	0.0206	2.236	GNAQ,GUCY1A1,PLCL2,PRKACB,VTI1A
Cachexia Signaling Pathway	1.6	0.0136	2.236	GSK3B,GUCY1A1,NR3C1,PRKACB,PTEN
p53 Signaling	4.1	0.051	2	GSK3B,HDAC9,PIAS1,PTEN,STAG1
Synaptic Long Term Potentiation	2.63	0.0323	2	GNAQ,PLCL2,PPP3CA,PRKACB
Ribonucleotide Reductase Signaling Pathway	2.11	0.023	2	ARID2,CDK6,PARP8,TNKS
Insulin Secretion Signaling Pathway	2.07	0.0179	2	GNAQ,GUCY1A1,PLCL2,PRKACB,VTI1A
Protein Sorting Signaling Pathway	2.05	0.0221	2	GNAQ,GUCY1A1,PRKACB,SNX13
Aryl Hydrocarbon Receptor Signaling	2.03	0.0219	2	CDK6,NCOA2,NFIA,NRIP1
Acetylcholine Receptor Signaling Pathway	1.91	0.0202	2	GNAQ,GUCY1A1,PLCL2,PRKACB
Adrenergic Receptor Signaling Pathway (Enhanced)	1.91	0.0202	2	GNAQ,GUCY1A1,PLCL2,PRKACB
Neurovascular Coupling Signaling Pathway	1.69	0.0172	2	APP,GNAQ,GUCY1A1,PRKACB
Eicosanoid Signaling	1.42	0.0142	2	GNAQ,GUCY1A1,PLCL2,PRKACB
Myelination Signaling Pathway	3.15	0.0213	1.89	GSK3B,HDAC9,PPP3CA,PRKACB,PTEN,RAPGEF2,ZEB2
Cardiac Hypertrophy Signaling (Enhanced)	3.81	0.0186	1.667	ATF6,DIAPH2,GNAQ,GSK3B,GUCY1A1,HDAC9,PLCL2,PPP3CA,PRKACB,PTEN
Role of NFAT in Cardiac Hypertrophy	5.04	0.0349	1.633	GNAQ,GSK3B,GUCY1A1,HDAC9,PLCL2,PPP3CA,PRKACB,SLC8A1
Docosahexaenoic Acid (DHA) Signaling	3.02	0.0239	1.633	APP,GNAQ,GSK3B,GUCY1A1,PLCL2,PRKACB
Serotonin Receptor Signaling	1.72	0.0128	1.633	APP,GNAQ,GSK3B,GUCY1A1,PLCL2,PRKACB
Chronic Myeloid Leukemia Signaling	4.4	0.0285	1.414	CDK6,GAB2,GSK3B,HDAC9,PLCL2,PPP3CA,PTEN,SPRED1
Cardiac Hypertrophy Signaling	2.94	0.023	1.342	GNAQ,GSK3B,GUCY1A1,PLCL2,PPP3CA,PRKACB
Adrenomedullin signaling pathway	2.66	0.0248	1.342	GNAQ,GSK3B,GUCY1A1,PLCL2,PRKACB
Oxytocin Signaling Pathway	2.03	0.0175	1.342	GNAQ,GSK3B,GUCY1A1,PPP3CA,PRKACB
Role of Macrophages, Fibroblasts and Endothelial Cells in Rheumatoid Arthritis	1.75	0.0148	1.342	GNAQ,GSK3B,NLK,PLCL2,PPP3CA
RAR Activation	2.47	0.0162	1.134	ARID2,GNAQ,GUCY1A1,NRIP1,PRKACB,PTEN,TRIM24
Endocannabinoid Neuronal Synapse Pathway	3.24	0.0333	1	GNAQ,GUCY1A1,PLCL2,PPP3CA,PRKACB
Sertoli Cell-Germ Cell Junction Signaling Pathway (Enhanced)	1.66	0.0169	1	EPS8,GSK3B,GUCY1A1,PRKACB
Protein Kinase A Signaling	2.68	0.0177	0.816	GNAQ,GSK3B,GUCY1A1,PLCL2,PPP3CA,PRKACB,PTEN
Mitochondrial Division Signaling Pathway	3.04	0.0301	0.447	APP,GNAQ,GSK3B,PPP3CA,PRKACB
Gap Junction Signaling	3.1	0.0209	0.378	GNAQ,GSK3B,GUCY1A1,PLCL2,PPP3CA,PRKACB,RUNX2
Estrogen Receptor Signaling	6.47	0.0292	0.302	GNAQ,GSK3B,GUCY1A1,MED13L,NCOA2,NR3C1,NRIP1,PLCL2,PRKACB,PTEN,RUNX2,TBL1XR1

## Sheet: Module 8
Ingenuity Canonical Pathways	-log(p-value)	Ratio	z-score	Molecules
ABRA Signaling Pathway	3.92	0.0455	2	FOS,FOSB,JUNB,JUND
NAP1L1 Transcription Regulation Signaling Pathway	3.9	0.0449	2	DDX5,JUN,MCL1,NAP1L1
Production of Nitric Oxide and Reactive Oxygen Species in Macrophages	2.65	0.0208	2	FOS,JUN,RHOB,TLR2
NOD1/2 Signaling Pathway	2.64	0.0207	2	FOS,JUN,RIPK2,TLR2
Activin Inhibin Signaling Pathway	2.49	0.0189	2	FOS,FOSB,JUN,TLR2
Autophagy	2.44	0.0183	2	DDIT3,FOS,JUN,RIPK2
NAFLD Signaling Pathway	2.41	0.0179	2	DDIT3,FOS,JUN,TLR2
Colorectal Cancer Metastasis Signaling	2.12	0.0148	2	FOS,JUN,RHOB,TLR2
Chronic Myeloid Leukemia Signaling	2.06	0.0142	2	FOS,JUN,KLF4,MCL1
Neuroinflammation Signaling Pathway	1.83	0.0121	2	CD86,FOS,JUN,TLR2
Pathogen Induced Cytokine Storm Signaling Pathway	1.62	0.0105	2	FOS,JUN,SRGN,TLR2
Estrogen Receptor Signaling	1.52	0.00973	2	DDX5,FOS,JUN,MED12L
RAR Activation	3.62	0.0162	1.89	CCNH,CITED2,DUSP1,FOS,JUN,KLF2,RHOB
Glycation Signaling Pathway	3.33	0.0222	1.342	DDIT3,FOS,JUN,MSR1,OLR1
HER-2 Signaling in Breast Cancer	2.39	0.0176	1	ARF4,ELF1,FOS,JUN
IL-12 Signaling and Production in Macrophages	2.29	0.0165	1	FOS,JUN,RIPK2,TLR2
NRF2-mediated Oxidative Stress Response	2.12	0.0148	1	FOS,JUN,JUNB,JUND
Macrophage Alternative Activation Signaling Pathway	3.64	0.026	0.447	DUSP1,FOS,JUN,KLF4,TSC22D3
Senescence Pathway	2.76	0.0166	0.447	ATF3,ELF1,JUN,TLR2,ZFP36L1
