# Supplementary material for: Opioid-induced immunosuppression of brain myeloid cells in SIV-infected rhesus macaques
Source: Research Square preprint supplement (doi:10.21203/rs.3.rs-7394731/v1), 2025-09-18
Supplement: Supplementary file 5 [file b84c8dfe55363e2020f06518.xlsx]

## Sheet: Homeostatic
group_name	name	Log2FC	FDR	MeanDiff
Morphine	ARHGAP26	0.926193	1.00005e-22	4.00647
Morphine	ASTN2	0.594351	1.63694e-22	11.167
Morphine	KCNAB1	2.65554	2.14145e-22	1.37885
Morphine	CLEC7A	3.5033	3.15548e-19	0.968924
Morphine	PLD5	0.935671	1.2632e-18	5.56616
Morphine	FAM149A	0.580588	1.30676e-14	3.86776
Morphine	RPS15A	0.844779	9.32653e-13	1.34745
Morphine	LOC698152	0.988709	3.78589e-11	0.910304
Morphine	RTTN	0.522226	3.78589e-11	5.75885
Morphine	FKBP5	0.507194	1.11407e-10	3.30427
Morphine	PRKD1	5.34604	1.11407e-10	0.667989
Morphine	MNDA	0.519215	4.67035e-10	1.93501
Morphine	PRCP	0.583446	4.72848e-10	1.5487
Morphine	AKT3	0.95275	1.91142e-09	1.85036
Morphine	CALCR	0.762527	2.32971e-09	1.01039
Morphine	DCAF6	0.777239	4.64299e-09	1.18338
Morphine	CNTNAP4	7.50741	4.87819e-09	0.361903
Morphine	RGS6	1.37552	1.17631e-08	1.38604
Morphine	TSPAN7	1.08711	1.2351e-08	0.543858
Morphine	CHRNA7	1.34179	8.85381e-08	0.629618
Morphine	LOC114676845	0.594692	1.13846e-07	1.28455
Morphine	SMIM35	1.67632	1.2083e-07	0.47432
Morphine	PRKCH	0.661415	1.94471e-07	1.97041
Morphine	SEMA3C	1.80378	4.18653e-07	0.302159
Morphine	SMYD3	0.719583	4.22277e-07	1.72877
Morphine	RFLNB	2.07113	5.74689e-07	0.193563
Morphine	MOB3B	1.73221	7.29367e-07	0.424961
Morphine	MFSD1	0.650844	9.59783e-07	0.57099
Morphine	TP63	1.4607	1.26215e-06	0.684753
Morphine	RNF150	1.2428	1.26215e-06	0.856128
Morphine	EPHB1	1.67455	1.82046e-06	0.298898
Morphine	UGCG	0.761376	4.7361e-06	0.363504
Morphine	GABRG3	2.25173	5.71593e-06	0.548423
Morphine	EPS8	0.51775	1.27394e-05	1.1911
Morphine	ANKRD36C	1.32598	1.35582e-05	0.43915
Morphine	CD72	0.688053	1.62781e-05	0.382426
Morphine	LOC114676844	0.581143	2.55082e-05	0.860682
Morphine	ANKH	0.532861	2.61852e-05	0.699104
Morphine	RYBP	0.571308	3.30676e-05	0.610337
Morphine	SEPTIN9	1.12382	3.30676e-05	0.242909
Morphine	EXT1	0.553952	3.40231e-05	1.4951
Morphine	TMTC4	1.07775	4.42771e-05	0.351483
Morphine	THSD4	0.774667	4.53535e-05	0.795259
Morphine	ROR2	0.708214	5.28473e-05	0.69851
Morphine	LOC106999943	1.0061	6.12551e-05	0.312399
Morphine	COG6	0.794444	7.27753e-05	0.395685
Morphine	TMEM135	0.755611	7.92618e-05	0.632971
Morphine	TSHZ2	0.795814	0.000105175	0.587007
Morphine	EMB	0.773805	0.000108734	0.438819
Morphine	SYNDIG1	0.501807	0.000115042	1.48304
Morphine	WASL	0.782116	0.000123226	0.648957
Morphine	EML1	0.669554	0.000135116	0.59228
Morphine	TRPC3	0.552615	0.00014067	0.500343
Morphine	PALLD	0.731986	0.000142865	0.460111
Morphine	WWP2	0.730986	0.000160615	0.48034
Morphine	LOC114670137	3.7038	0.000174819	0.137381
Morphine	DMXL1	0.516828	0.000181388	0.63646
Morphine	STXBP6	1.40552	0.000209129	0.339558
Morphine	TMEM156	0.795743	0.000209241	0.636486
Morphine	CUL1	0.583233	0.000278031	0.413045
Morphine	PASK	0.545928	0.000333994	0.247642
Morphine	PATJ	0.832923	0.000371028	0.390618
Morphine	SLC23A2	0.76531	0.000375998	0.380409
Morphine	TMEM260	0.79925	0.000491342	0.453557
Morphine	BOC	1.42252	0.000545992	0.251614
Morphine	C1H1orf127	2.12474	0.000601947	0.208579
Morphine	LOC106997985	0.817148	0.000670615	0.256203
Morphine	SLC13A3	1.15685	0.000732418	0.368394
Morphine	PDE8B	1.65408	0.000757148	0.247515
Morphine	CLEC1A	5.45558	0.000830994	0.0857657
Morphine	C5H4orf19	0.909469	0.000958293	0.457359
Morphine	MBNL2	0.584208	0.0010489	0.305416
Morphine	BRWD1	0.521378	0.00119516	0.709224
Morphine	LOC100427957	0.756305	0.0013142	0.361172
Morphine	RNF217	0.501936	0.00132664	0.423012
Morphine	LOC107000196	2.0117	0.00132664	0.155564
Morphine	DNER	1.12217	0.00132664	0.417581
Morphine	C11H12orf4	0.83915	0.00142937	0.172948
Morphine	HEG1	0.62846	0.00150824	0.231181
Morphine	COMMD1	0.645076	0.00150824	0.49653
Morphine	LOC106994778	0.689547	0.0015376	0.254381
Morphine	NFIB	1.68667	0.00171056	0.372301
Morphine	PLAG1	0.552049	0.00177964	0.36559
Morphine	PID1	1.20015	0.00177964	0.456757
Morphine	FAM76B	0.54408	0.00177964	0.245011
Morphine	ZNF385D	1.85194	0.00187527	0.318984
Morphine	TRPM8	0.626755	0.00187527	0.337658
Morphine	GCNT2	0.641218	0.00192255	0.483686
Morphine	IL1R2	5.26861	0.00194851	0.0750972
Morphine	SLC25A26	0.619315	0.00196545	0.472821
Morphine	PDCD1LG2	0.643443	0.0023893	0.257768
Morphine	LOC107000272	1.03507	0.00245271	0.236738
Morphine	DNAJC2	0.521571	0.00265982	0.217644
Morphine	CCL8	1.2846	0.00268105	0.113926
Morphine	CEP112	0.912992	0.00268105	0.507323
Morphine	KBTBD12	0.642481	0.00279184	0.422384
Morphine	MACROD2	0.919996	0.00309344	0.317528
Morphine	CASP10	0.973509	0.00347821	0.211465
Morphine	LOC106992862	0.611289	0.00402553	0.365272
Morphine	FOCAD	1.198	0.00415579	0.545831
Morphine	GPR137B	0.51266	0.00426367	0.281311
Morphine	IL21R	1.96236	0.00442535	0.181827
Morphine	PPP2R2B	0.56212	0.00479576	0.313211
Morphine	ANGEL2	0.713625	0.0049274	0.27908
Morphine	LOC114674199	0.519291	0.00510494	0.299866
Morphine	SRGAP3	1.11894	0.00545014	0.326339
Morphine	MIGA1	0.690548	0.00559281	0.319671
Morphine	LOC107000198	1.37639	0.00567468	0.157335
Morphine	RBM41	0.845865	0.00615343	0.334407
Morphine	JAZF1	0.58158	0.00633607	0.27856
Morphine	C12H2orf88	1.30233	0.00635509	0.180088
Morphine	PTRH2	1.27958	0.00706001	0.130542
Morphine	FAM160B1	0.667973	0.00726906	0.210399
Morphine	LOC107000197	1.65735	0.0072706	0.115955
Morphine	ETFBKMT	0.50014	0.00820354	0.316118
Morphine	LOC114680346	1.33419	0.0083611	0.0846635
Morphine	CELF6	1.26581	0.00843825	0.110859
Morphine	KATNAL1	0.629593	0.00930869	0.216826
Morphine	MMS22L	0.622186	0.00978699	0.164367
Morphine	TCAIM	0.859854	0.0102831	0.265924
Morphine	LYPLAL1	0.574752	0.0102857	0.274753
Morphine	LOC114672806	1.49691	0.0111067	0.115422
Morphine	CASP8AP2	0.804004	0.0112438	0.244824
Morphine	CHD8	0.512559	0.0113151	0.293786
Morphine	TMC6	2.64515	0.0113151	0.0963208
Morphine	LOC106994400	1.95596	0.012127	0.108944
Morphine	TMPO	0.583961	0.0134606	0.237311
Morphine	SUCLA2	0.808812	0.0134606	0.19331
Morphine	PAM	1.55265	0.013585	0.266991
Morphine	CENPJ	0.657755	0.0136539	0.172296
Morphine	UBE3D	0.772609	0.0139683	0.354665
Morphine	CD244	0.636632	0.0142158	0.256835
Morphine	SP4	0.776797	0.0143305	0.256182
Morphine	SLC25A29	0.855468	0.0152195	0.238229
Morphine	LOC715936	0.651127	0.0154192	0.166725
Morphine	DDX42	0.505966	0.0154479	0.269345
Morphine	LOC106995967	0.569042	0.0155512	0.154624
Morphine	ZFYVE9	1.08423	0.0160768	0.323568
Morphine	AGK	0.531648	0.0161633	0.24269
Morphine	LOC698860	0.627764	0.0161955	0.203762
Morphine	THOC1	0.671114	0.0165555	0.234435
Morphine	DAPP1	0.69031	0.0166531	0.12466
Morphine	LOC114671105	0.683601	0.0173699	0.152342
Morphine	LOC722074	0.559837	0.0173699	0.142377
Morphine	AHNAK2	1.83197	0.0174747	0.064481
Morphine	LOC114673742	0.543407	0.0185738	0.109126
Morphine	GOLIM4	0.783982	0.0195938	0.186487
Morphine	PDXDC1	0.607773	0.0201125	0.229017
Morphine	LOC106992311	0.567925	0.0206441	0.0908161
Morphine	CCDC6	0.703726	0.0213098	0.263504
Morphine	GART	0.60904	0.0213715	0.10026
Morphine	EFCC1	0.615198	0.0218902	0.120316
Morphine	KREMEN1	0.560363	0.0240053	0.241341
Morphine	TMEM241	0.540175	0.0242018	0.176763
Morphine	GRAMD1A	0.511127	0.0242018	0.238756
Morphine	GFM1	0.913238	0.0242209	0.183952
Morphine	C11H12orf75	0.698855	0.0242209	0.297302
Morphine	BIVM	1.11289	0.0251584	0.0651344
Morphine	SPTBN1	1.58139	0.025197	0.103455
Morphine	ANO2	0.513463	0.0253951	0.382608
Morphine	HMGA2	0.94662	0.0258501	0.284911
Morphine	WDR59	0.757076	0.0266475	0.17602
Morphine	LDLRAD3	0.6825	0.0267142	0.242946
Morphine	RFFL	0.678711	0.0269145	0.350888
Morphine	KCTD3	1.40288	0.0275795	0.217531
Morphine	LOC106997403	4.17124	0.0276339	0.0596328
Morphine	SYNCRIP	0.620569	0.0294834	0.273112
Morphine	RRM2B	0.828374	0.0294834	0.166167
Morphine	GPR155	0.578989	0.0302957	0.0693106
Morphine	POLA1	0.566703	0.0319241	0.246698
Morphine	LOC702140	1.64748	0.0331394	0.074145
Morphine	AP4S1	0.742289	0.033216	0.193782
Morphine	ERV3-1	0.848579	0.0334526	0.297152
Morphine	HARS2	0.614568	0.0341845	0.0746573
Morphine	CLPX	0.873844	0.0361827	0.247037
Morphine	ZNF322	0.804457	0.0369578	0.12979
Morphine	PEX7	0.650259	0.0374554	0.211539
Morphine	EIF2AK1	1.59681	0.0378034	0.135188
Morphine	PIGN	0.551281	0.0384656	0.288219
Morphine	MRPS28	0.521335	0.0402711	0.375574
Morphine	SEMA7A	0.724078	0.0426282	0.102887
Morphine	ABCA1	0.646625	0.0431028	0.155267
Morphine	USP40	0.636268	0.0431178	0.255573
Morphine	UBA5	1.05667	0.0431865	0.134747
Morphine	NDUFAF2	0.539792	0.0431865	0.293795
Morphine	GCLC	0.620323	0.0433251	0.189002
Morphine	NAPB	1.21134	0.0454463	0.165385
Morphine	RAD18	1.3647	0.0455853	0.108601
Morphine	ZSCAN29	1.55035	0.0455853	0.0646084
Morphine	LOC106996187	3.68617	0.0455853	0.0655431
Morphine	BAZ2A	0.7938	0.0465154	0.168547
Morphine	LOC106997090	4.62396	0.0472931	0.0473152
Morphine	LOC114679309	4.85913	0.0472931	0.0560461
Morphine	RAP2A	0.56469	0.0475772	0.158059
Morphine	NSUN2	0.675046	0.0477525	0.101243
Morphine	PDCD11	0.638881	0.0481654	0.096857
Morphine	SMAD6	0.590002	0.0489171	0.142847
Morphine	DEPDC7	0.672336	0.0489171	0.0611643
Morphine	NPHP4	0.698504	0.0497714	0.137715
MorphineSIV	LOC693820	1.35646	5.59625e-20	1.17617
MorphineSIV	CLEC7A	2.95672	2.50567e-19	1.12669
MorphineSIV	ARHGAP26	0.983884	1.46213e-17	4.28135
MorphineSIV	LOC698152	1.48147	8.40967e-16	1.25138
MorphineSIV	FKBP5	0.663828	4.58389e-12	4.67496
MorphineSIV	GASK1B	0.981815	1.52386e-10	0.988168
MorphineSIV	HS3ST4	1.30559	1.80402e-10	2.32289
MorphineSIV	LOC106994692	7.23169	5.82986e-10	0.298597
MorphineSIV	PLEK	1.32925	5.15981e-09	2.819
MorphineSIV	PPP2R2B	1.20507	2.20375e-08	0.952762
MorphineSIV	ATP13A3	0.974859	2.32542e-08	2.11786
MorphineSIV	BRD9	0.914502	2.32542e-08	0.583804
MorphineSIV	CPNE4	3.27761	4.82434e-08	0.39937
MorphineSIV	RTTN	0.590631	1.83608e-07	5.82571
MorphineSIV	LOC114673210	2.1013	8.28655e-07	0.333142
MorphineSIV	CEP128	0.798039	7.77874e-06	1.31276
MorphineSIV	RNASEH2B	0.724136	1.13648e-05	1.04492
MorphineSIV	RNF122	1.07473	1.61869e-05	0.546856
MorphineSIV	OLR1	0.524365	2.08236e-05	1.16026
MorphineSIV	LOC114676795	2.21312	3.58143e-05	0.314491
MorphineSIV	CD163	0.796642	5.57158e-05	2.55034
MorphineSIV	RPS15A	0.658246	5.57158e-05	1.16274
MorphineSIV	LOC100426537	0.859231	8.72102e-05	0.773302
MorphineSIV	PARD3B	0.961184	9.00167e-05	1.11499
MorphineSIV	JDP2	0.576219	9.65672e-05	1.80131
MorphineSIV	PI4K2A	0.539443	9.93415e-05	1.14575
MorphineSIV	HIF1A	0.728047	0.000100111	3.25587
MorphineSIV	TXNIP	0.503553	0.000117277	1.59524
MorphineSIV	EGR3	0.84106	0.000126192	0.659532
MorphineSIV	GPHN	0.835023	0.000159409	1.02826
MorphineSIV	NXN	1.43775	0.000160296	0.335046
MorphineSIV	TENT5A	1.8606	0.000167281	0.282529
MorphineSIV	MSR1	0.786417	0.000187715	3.12033
MorphineSIV	KYNU	0.534909	0.000197719	0.920431
MorphineSIV	MPC2	1.36875	0.000300391	0.298071
MorphineSIV	GLUL	0.515263	0.000344397	0.843394
MorphineSIV	RAB20	1.05713	0.000368378	1.34816
MorphineSIV	ZNF704	1.44697	0.00056667	0.284977
MorphineSIV	RPL29	0.68836	0.000574307	0.233988
MorphineSIV	ADGRL2	1.4656	0.000638827	0.676349
MorphineSIV	PPIA	0.584515	0.000638827	0.423107
MorphineSIV	LOC705327	4.97576	0.000699765	0.152909
MorphineSIV	LOC114674664	3.16749	0.000707001	0.15535
MorphineSIV	MS4A4A	1.24622	0.000793309	0.386144
MorphineSIV	CBFA2T3	2.05906	0.00098521	0.199254
MorphineSIV	HMGA2	1.55233	0.00105154	0.613359
MorphineSIV	UGGT2	2.67297	0.00105154	0.247905
MorphineSIV	RASGEF1B	0.579512	0.00116515	1.0214
MorphineSIV	LOC114679374	1.28874	0.00127829	0.437513
MorphineSIV	MCL1	0.55107	0.00147273	0.879323
MorphineSIV	CEMIP2	1.59266	0.00162342	0.459362
MorphineSIV	CLEC12A	0.622703	0.00227754	0.48152
MorphineSIV	NR4A1	0.770318	0.00296281	0.557278
MorphineSIV	CD274	1.11982	0.00365513	0.154562
MorphineSIV	ZNF655	0.616523	0.00394771	0.274115
MorphineSIV	TRPS1	2.45406	0.00394771	0.29802
MorphineSIV	DCAF6	0.534948	0.00458893	0.806308
MorphineSIV	ARHGAP6	0.646646	0.00651158	0.96946
MorphineSIV	SEPTIN9	1.13894	0.00707987	0.301403
MorphineSIV	CITED2	0.721651	0.00831889	0.454228
MorphineSIV	RTN1	0.647706	0.00836941	1.23516
MorphineSIV	RYBP	0.531872	0.00878822	0.604787
MorphineSIV	UBAP1	0.533109	0.00882251	0.442828
MorphineSIV	STXBP6	1.25508	0.0103102	0.355599
MorphineSIV	VOPP1	2.51092	0.0139449	0.125387
MorphineSIV	ELL2	0.651546	0.0153513	0.538153
MorphineSIV	MYO1D	3.06603	0.0153513	0.16689
MorphineSIV	GADD45B	0.718092	0.0159607	0.417717
MorphineSIV	ATF3	0.517836	0.0163048	0.378775
MorphineSIV	ACSS2	1.06657	0.0180241	0.259227
MorphineSIV	PID1	1.07813	0.0183677	0.455901
MorphineSIV	XYLT1	0.651005	0.0203515	1.0486
MorphineSIV	NLN	1.6406	0.0214165	0.208748
MorphineSIV	SCHIP1	2.15875	0.0217164	0.149486
MorphineSIV	HIC2	1.18747	0.0220717	0.184845
MorphineSIV	NFKBID	0.59246	0.022574	0.325852
MorphineSIV	FABP5	1.88803	0.0238271	0.141768
MorphineSIV	CD5L	1.89377	0.0249728	0.16038
MorphineSIV	FAM227A	2.32367	0.0288629	0.104987
MorphineSIV	RNF150	1.02466	0.0303767	0.533246
MorphineSIV	RBFOX2	0.734328	0.0329337	0.413968
MorphineSIV	BTBD19	0.84127	0.033252	0.248946
MorphineSIV	LOC114669793	1.33005	0.0341601	0.19555
MorphineSIV	BASP1	0.759826	0.0341601	0.725063
MorphineSIV	TMC6	2.37686	0.0341601	0.0771043
MorphineSIV	DMXL2	0.610037	0.0354669	0.46203
MorphineSIV	ANXA11	1.08406	0.0410277	0.364171
MorphineSIV	RAB18	0.64696	0.0413816	0.348612
MorphineSIV	LBH	5.03977	0.0443232	0.063789
MorphineSIV	SIAH1	0.670492	0.0451653	0.224101
MorphineSIV	LOC114674372	3.37166	0.0451653	0.149036
MorphineSIV	RPL14	0.578548	0.0461876	0.278527
MorphineSIV	CASP7	0.679239	0.0478599	0.521562
MorphineSIV	LOC114674671	2.15005	0.0493278	0.0842879
SalineSIV	LOC114673210	10.4582	6.38799e-59	164.717
SalineSIV	ADORA2B	7.4826	3.9399e-48	6.20732
SalineSIV	RBPMS	10.5829	2.63013e-43	3.06559
SalineSIV	LOC100499503	5.68475	1.69747e-35	1.93104
SalineSIV	MNDA	1.01431	8.18334e-33	4.76338
SalineSIV	LOC106998573	6.67332	2.54168e-31	1.34408
SalineSIV	LOC114679371	5.64163	5.7117e-31	1.45974
SalineSIV	BMT2	3.78191	1.89987e-28	13.1582
SalineSIV	RPL37	1.1463	1.95695e-19	1.71239
SalineSIV	CLEC7A	2.81625	3.07341e-18	1.02644
SalineSIV	MYO1D	5.36124	7.71061e-18	0.736804
SalineSIV	SRGN	0.594971	4.03852e-13	6.28092
SalineSIV	MFSD1	1.08771	2.73064e-12	1.15122
SalineSIV	LOC106995258	1.71465	2.73064e-12	0.789289
SalineSIV	LOC703641	0.601454	4.74688e-10	2.30038
SalineSIV	LOC106999000	4.68133	1.01191e-09	0.376343
SalineSIV	EEF1A1	0.709173	3.42225e-09	1.11068
SalineSIV	EGR3	1.16867	8.83626e-09	0.943483
SalineSIV	ABR	0.588785	1.75632e-08	5.37274
SalineSIV	LOC697476	0.984356	2.36631e-08	0.643774
SalineSIV	FGL2	0.979197	2.79016e-08	0.88051
SalineSIV	D2HGDH	0.721211	9.05952e-08	0.654793
SalineSIV	BTG2	0.525345	9.72658e-08	1.86334
SalineSIV	TMC6	3.77506	9.72658e-08	0.217218
SalineSIV	ATF4	0.722756	1.12513e-07	0.866373
SalineSIV	MAMU-A	1.13353	1.63889e-07	0.444393
SalineSIV	SLC2A5	0.540716	2.22537e-07	1.47594
SalineSIV	CD163	0.858856	3.30211e-07	2.9177
SalineSIV	ZFP36	0.55045	6.08434e-07	2.54134
SalineSIV	SCN1B	0.685757	1.09275e-06	0.659513
SalineSIV	FUS	0.676414	1.22618e-06	0.914281
SalineSIV	OLR1	0.56534	1.8748e-06	1.60776
SalineSIV	LOC718777	0.887505	3.79347e-06	0.866657
SalineSIV	HMGA2	1.45286	4.43943e-06	0.547351
SalineSIV	AP5Z1	2.1759	4.50158e-06	0.356516
SalineSIV	CLEC12A	1.17972	8.24774e-06	0.814317
SalineSIV	CEBPD	0.584123	8.70123e-06	1.01873
SalineSIV	SNRNP70	0.525121	1.44329e-05	0.573771
SalineSIV	APPL2	0.653916	1.85069e-05	2.1619
SalineSIV	TMEM156	0.940669	1.9362e-05	0.868613
SalineSIV	LOC694064	0.665517	2.57335e-05	1.47241
SalineSIV	MLXIPL	0.869796	2.70767e-05	0.469168
SalineSIV	ARG2	0.942823	3.24032e-05	0.439219
SalineSIV	STARD13	0.781762	3.31792e-05	0.397699
SalineSIV	FSCN1	0.684138	3.47823e-05	0.577639
SalineSIV	SLC11A1	0.775531	5.35942e-05	0.904412
SalineSIV	JPT1	0.752673	5.74173e-05	0.765441
SalineSIV	MSR1	0.717894	6.14745e-05	2.80785
SalineSIV	USF2	0.739988	7.61209e-05	0.408209
SalineSIV	GLUL	0.604849	7.68691e-05	0.806819
SalineSIV	EIF4A1	0.520189	7.78337e-05	0.521189
SalineSIV	C1H1orf127	1.96297	8.46524e-05	0.278768
SalineSIV	CD44	2.42606	9.54613e-05	0.434926
SalineSIV	NAIP	1.04452	0.000125149	0.604297
SalineSIV	LOC721591	2.95221	0.000125149	0.241226
SalineSIV	LOC106995137	0.850864	0.000126675	0.630739
SalineSIV	BRD9	0.693286	0.000129914	0.4925
SalineSIV	GAS6	0.703748	0.000135486	0.573656
SalineSIV	ST6GAL1	0.582122	0.000169029	1.09285
SalineSIV	CNDP2	0.70208	0.00017596	0.45482
SalineSIV	TAL1	0.607905	0.0001761	0.786358
SalineSIV	CEBPB	0.61437	0.0001761	1.01163
SalineSIV	ETS2	0.554406	0.000177695	1.49904
SalineSIV	SH3GL1	0.705525	0.000200932	0.455617
SalineSIV	IL6R	0.555668	0.000217659	0.88263
SalineSIV	GRAMD1A	0.731001	0.000232385	0.372889
SalineSIV	HAVCR2	0.517968	0.000257165	0.997712
SalineSIV	EEF1D	0.765325	0.000287839	0.366221
SalineSIV	NFKBID	1.11451	0.000287908	0.749391
SalineSIV	LOC714964	0.801315	0.000291826	0.204823
SalineSIV	ANGPTL6	0.921956	0.000291826	0.190665
SalineSIV	ERCC3	0.954104	0.000314557	0.354375
SalineSIV	NRP2	0.598773	0.000319009	1.0217
SalineSIV	LOC114676795	1.93388	0.000332486	0.254223
SalineSIV	LOC107000198	2.69842	0.000332486	0.228807
SalineSIV	LOC114676434	0.524686	0.000335761	0.553832
SalineSIV	NR4A1	1.21116	0.000345568	0.992836
SalineSIV	STRAP	0.914622	0.000347568	0.299388
SalineSIV	NCF1	1.05706	0.000355441	0.236342
SalineSIV	ARPC1B	0.52985	0.000372758	0.551635
SalineSIV	MTCH1	0.981896	0.000372758	0.330297
SalineSIV	TMTC2	1.81299	0.000384751	0.211505
SalineSIV	CNTNAP4	3.07642	0.000384751	0.192089
SalineSIV	PDGFB	0.831516	0.00043731	1.19574
SalineSIV	GADD45B	0.911296	0.000451073	0.581876
SalineSIV	CCL3	0.77178	0.000517066	0.575157
SalineSIV	SLC4A2	1.40205	0.00052484	0.18332
SalineSIV	ATP13A3	0.565006	0.000551413	1.11362
SalineSIV	PCED1B	0.525887	0.000581801	1.2816
SalineSIV	APOE	0.727205	0.00062373	4.7109
SalineSIV	LOC106997985	1.02697	0.000657385	0.382889
SalineSIV	TARDBP	0.758674	0.000694673	0.38483
SalineSIV	HOXA9	3.52916	0.000696988	0.265924
SalineSIV	TPR	0.855404	0.000754254	0.617281
SalineSIV	CDV3	0.620368	0.000754254	0.760755
SalineSIV	TMEM87A	0.693492	0.0007561	0.637433
SalineSIV	CNPPD1	0.889774	0.0007561	0.288181
SalineSIV	IL4R	1.04483	0.00079326	0.449729
SalineSIV	SAMD12	1.54381	0.000866238	0.443234
SalineSIV	NPL	0.586264	0.00100303	0.653893
SalineSIV	PLEKHM2	0.661073	0.00102264	0.445976
SalineSIV	P2RY14	3.12873	0.00103827	0.217084
SalineSIV	SPHK1	2.43889	0.001136	0.146393
SalineSIV	SLC2A11	1.06499	0.00142792	0.475516
SalineSIV	ARHGEF10L	1.0973	0.00147491	0.342481
SalineSIV	NFE2L1	0.979324	0.00153058	0.335443
SalineSIV	ERV3-1	1.04701	0.00180546	0.40537
SalineSIV	RPS19BP1	0.816686	0.00181925	0.362134
SalineSIV	LOC708096	1.00004	0.00186761	0.180452
SalineSIV	INPP5A	1.69889	0.00194352	0.421201
SalineSIV	POLD4	0.747727	0.00217837	0.273654
SalineSIV	STXBP6	0.826465	0.00222628	0.242281
SalineSIV	SCML1	0.773399	0.00240577	0.462532
SalineSIV	LOC100426537	0.716506	0.00252457	0.710619
SalineSIV	ZMIZ2	2.98127	0.00258232	0.158451
SalineSIV	SECISBP2	0.540965	0.00258232	0.407828
SalineSIV	PKNOX1	0.831842	0.00267	0.324745
SalineSIV	MYO15B	0.813364	0.00271596	0.367339
SalineSIV	TMEM106C	1.04614	0.00302859	0.198756
SalineSIV	LRSAM1	1.08704	0.00372463	0.368658
SalineSIV	LOC716161	1.08908	0.00374574	0.264473
SalineSIV	LOC114670865	1.02665	0.00383362	0.189777
SalineSIV	CDH4	1.48662	0.00390523	0.249888
SalineSIV	LOC107000196	2.66082	0.00404399	0.143658
SalineSIV	LOC114677645	4.36205	0.00410829	0.0968899
SalineSIV	NLRP1	0.587707	0.00410829	0.602371
SalineSIV	DPP7	0.537658	0.00415012	0.466843
SalineSIV	IRAK2	0.603149	0.00446491	0.625992
SalineSIV	DACT3	1.592	0.00509378	0.150273
SalineSIV	SLC25A29	0.978431	0.00561288	0.345958
SalineSIV	LOC106996627	1.03045	0.00565995	0.274853
SalineSIV	EEF2	0.933549	0.00569166	0.272976
SalineSIV	MX2	0.884969	0.00609519	0.362985
SalineSIV	PRRC2A	0.732415	0.00664137	0.221128
SalineSIV	ZDHHC7	0.507042	0.00664447	0.186334
SalineSIV	PPP1R15B	0.621252	0.00664554	0.326864
SalineSIV	HDAC3	1.30263	0.00664554	0.240499
SalineSIV	GRASP	0.779468	0.00667616	0.652265
SalineSIV	DDX39B	0.627737	0.00704435	0.369768
SalineSIV	LOC705327	2.98671	0.00779274	0.197458
SalineSIV	GUSBA	0.73382	0.00794299	0.391739
SalineSIV	ATP13A2	0.798287	0.00812276	0.26851
SalineSIV	CLASRP	0.868336	0.00817999	0.336876
SalineSIV	ABHD16A	0.743382	0.00828845	0.347695
SalineSIV	EIF5B	0.796581	0.00845621	0.326529
SalineSIV	HEG1	0.749698	0.0085779	0.24241
SalineSIV	DCAF1	0.608129	0.00866261	0.338892
SalineSIV	LOC114673461	2.46665	0.00885642	0.103721
SalineSIV	HTT	0.563288	0.00886843	0.350922
SalineSIV	SLC45A4	0.696325	0.00953005	0.260042
SalineSIV	EXD3	0.952693	0.00953005	0.201813
SalineSIV	THEMIS2	1.24636	0.00961512	0.3322
SalineSIV	LOC114677496	0.831353	0.00969309	0.261811
SalineSIV	ARAF	1.4333	0.0098946	0.210866
SalineSIV	MORF4L2	0.677648	0.0101296	0.361437
SalineSIV	SELENOO	1.08443	0.010182	0.317783
SalineSIV	TRAIP	1.26936	0.0102884	0.243058
SalineSIV	SLC25A4	0.612187	0.010405	1.00176
SalineSIV	LOC114680346	1.91499	0.0104143	0.162763
SalineSIV	PHKG1	0.91922	0.0108508	0.33496
SalineSIV	SERINC3	0.76553	0.0109785	0.261984
SalineSIV	IPO9	0.605812	0.011114	0.32782
SalineSIV	GABARAPL1	1.05922	0.0117348	0.238101
SalineSIV	CCL8	2.17959	0.0118029	0.145847
SalineSIV	PSPH	0.634537	0.0127897	0.294427
SalineSIV	CD74	0.5045	0.0129267	1.59548
SalineSIV	IFNAR2	0.562696	0.0129348	0.35966
SalineSIV	CCAR1	0.529799	0.0129348	0.456052
SalineSIV	ROR2	0.632262	0.0130117	0.59125
SalineSIV	LOC106999151	0.523783	0.0131097	0.383962
SalineSIV	STAT3	0.531626	0.0131883	0.461785
SalineSIV	TRIM27	0.716953	0.0137712	0.302536
SalineSIV	DDX50	0.578663	0.0137712	0.467967
SalineSIV	IL21R	1.20474	0.0139204	0.176766
SalineSIV	ARHGAP4	0.567321	0.0147474	0.466387
SalineSIV	PIEZO1	0.635559	0.0148044	0.346955
SalineSIV	GSR	0.705652	0.0152056	0.31117
SalineSIV	HIST1H1D	0.780734	0.0152732	0.28519
SalineSIV	UFD1	0.823791	0.0154207	0.222897
SalineSIV	SYDE2	5.35578	0.0154629	0.0798993
SalineSIV	TNFSF8	0.772269	0.0154629	0.514558
SalineSIV	TMC8	5.25683	0.0154629	0.0744705
SalineSIV	ARHGEF1	0.549829	0.0154629	0.272814
SalineSIV	BCAS2	0.772028	0.0155781	0.34795
SalineSIV	DDX27	1.08257	0.015708	0.236107
SalineSIV	LOC714576	0.670793	0.0158444	0.257217
SalineSIV	APOC1	1.07641	0.0161695	0.286883
SalineSIV	LOC713572	0.805414	0.0163265	0.395972
SalineSIV	IRAK1	1.28192	0.0163919	0.23312
SalineSIV	SERPINF1	0.601826	0.0164793	0.468424
SalineSIV	CD84	0.514971	0.0170519	0.408388
SalineSIV	KDM3B	0.539449	0.01747	0.488528
SalineSIV	RBBP7	0.661217	0.0176191	0.243755
SalineSIV	LOC716530	0.776645	0.0183915	0.267901
SalineSIV	ZNF704	1.20162	0.0188197	0.186897
SalineSIV	SORBS3	1.73864	0.0191594	0.165869
SalineSIV	OSGEP	0.66518	0.0195871	0.19045
SalineSIV	NCF2	0.527491	0.0196974	0.370923
SalineSIV	AOX2	0.7537	0.0196974	0.245231
SalineSIV	UBXN6	1.29495	0.0203494	0.0948757
SalineSIV	SPP1	0.631608	0.0204074	1.57842
SalineSIV	ASAH1	0.503478	0.0207781	0.474964
SalineSIV	TNIK	1.33337	0.0208594	0.174485
SalineSIV	FAM118B	1.0861	0.0208594	0.212747
SalineSIV	SIRT2	0.636529	0.0208594	0.266814
SalineSIV	RBM3	0.618389	0.0208787	0.340518
SalineSIV	TNFSF13B	1.10887	0.021152	0.277556
SalineSIV	LOC100425381	1.12016	0.0212017	0.175973
SalineSIV	HMGB2	0.905753	0.0213616	0.226347
SalineSIV	MON1A	2.24072	0.0218718	0.216864
SalineSIV	WDR81	0.678511	0.0223297	0.319333
SalineSIV	HDHD5	1.60174	0.0224749	0.111407
SalineSIV	PHGDH	1.92108	0.0230722	0.113636
SalineSIV	TM2D3	0.747277	0.0234639	0.220604
SalineSIV	NUDT22	0.522956	0.0235526	0.0738875
SalineSIV	SLC15A3	0.878345	0.0235526	0.248245
SalineSIV	MAEA	0.640946	0.0235832	0.210351
SalineSIV	AHCYL1	0.550704	0.0246648	0.275188
SalineSIV	M6PR	0.60373	0.0247536	0.395931
SalineSIV	COMT	0.722671	0.0251664	0.183728
SalineSIV	MIGA2	0.621604	0.0255787	0.239444
SalineSIV	SMNDC1	0.816145	0.0263158	0.246739
SalineSIV	CHRNA1	0.690956	0.026981	0.372996
SalineSIV	TANGO2	1.29819	0.0280505	0.266296
SalineSIV	MUS81	0.541886	0.028521	0.161895
SalineSIV	LOC712349	2.60705	0.028521	0.163985
SalineSIV	PLEKHO2	0.751261	0.0286004	0.195864
SalineSIV	TMBIM1	0.916748	0.0286004	0.21734
SalineSIV	TKT	0.822754	0.0286146	0.201728
SalineSIV	ANXA11	0.570973	0.0289516	0.243301
SalineSIV	LOC705269	0.87358	0.0295966	0.162287
SalineSIV	MRNIP	1.97891	0.0296389	0.113284
SalineSIV	TLCD2	1.1427	0.0297322	0.181043
SalineSIV	ARHGAP30	0.652178	0.0300361	0.192156
SalineSIV	C14H11orf96	2.61633	0.0300361	0.0907009
SalineSIV	LOC698152	0.599311	0.0305644	0.540174
SalineSIV	MAMU-DRB5	0.718537	0.0308773	0.189477
SalineSIV	CARD11	0.574638	0.0311137	0.361598
SalineSIV	ZNF207	0.507417	0.0311137	0.399603
SalineSIV	SLC11A2	0.684722	0.0312579	0.474092
SalineSIV	ARMCX3	0.793439	0.031789	0.200588
SalineSIV	NOD1	0.754247	0.0319205	0.352131
SalineSIV	DDX6	0.595824	0.0319205	0.39233
SalineSIV	HMGN1	0.586329	0.0319206	0.255927
SalineSIV	TMEM127	0.797735	0.0325684	0.294904
SalineSIV	INTS7	1.60746	0.0326351	0.194949
SalineSIV	EGR2	1.0954	0.0328157	0.185972
SalineSIV	ACADL	1.18251	0.0328157	0.164908
SalineSIV	PPFIA1	0.68987	0.0329119	0.427834
SalineSIV	SQSTM1	0.598981	0.0330988	0.397798
SalineSIV	C11H12orf43	2.43337	0.0330988	0.0848745
SalineSIV	LGALS12	1.75349	0.0330988	0.0895407
SalineSIV	AFDN	0.674407	0.0338863	0.29001
SalineSIV	PBLD	1.30101	0.0339194	0.346404
SalineSIV	CSKMT	1.36991	0.0340959	0.147608
SalineSIV	CCNB1IP1	2.87999	0.0345276	0.0938606
SalineSIV	UXS1	0.632751	0.0345276	0.783005
SalineSIV	GANAB	0.685219	0.0345276	0.177022
SalineSIV	FLII	0.547774	0.0345276	0.103543
SalineSIV	C16H17orf49	0.862804	0.0347539	0.124314
SalineSIV	RND3	2.11289	0.0356179	0.129878
SalineSIV	SAMD8	0.616166	0.0356456	0.335389
SalineSIV	ZNF330	0.730946	0.035693	0.284263
SalineSIV	ARL6IP6	0.701542	0.0357784	0.279043
SalineSIV	DHX34	1.46943	0.03603	0.18179
SalineSIV	TMEM259	0.62042	0.0360362	0.321954
SalineSIV	SCIMP	0.55937	0.0360947	0.188437
SalineSIV	NFIB	0.654627	0.0362647	0.0995826
SalineSIV	RETREG3	0.966893	0.0362647	0.155858
SalineSIV	LOC696998	0.774992	0.0362943	0.219658
SalineSIV	PPP4C	0.693322	0.0362943	0.204573
SalineSIV	RIPK1	0.69041	0.03846	0.308844
SalineSIV	BTN2A1	0.71003	0.0388376	0.160051
SalineSIV	GLE1	0.952067	0.0405848	0.240243
SalineSIV	CKLF	0.551821	0.0414368	0.236935
SalineSIV	SNN	0.769134	0.0415099	0.118567
SalineSIV	LOC696031	0.925553	0.0417965	0.239766
SalineSIV	HAMP	0.785049	0.0418286	0.145204
SalineSIV	SFR1	2.49909	0.0419356	0.112966
SalineSIV	FCGR2A	0.717845	0.0420574	0.487435
SalineSIV	ZC3H7B	0.625402	0.0422701	0.175541
SalineSIV	GPAT4	0.623507	0.0424198	0.18437
SalineSIV	KLF11	0.807745	0.042548	0.18798
SalineSIV	CMPK1	1.10184	0.0430979	0.298505
SalineSIV	KDM1B	1.18359	0.0434357	0.262202
SalineSIV	GRHL1	0.660764	0.0437227	0.406067
SalineSIV	MYO7A	1.00064	0.0441657	0.244108
SalineSIV	LOC106995672	1.08195	0.0442104	0.0815987
SalineSIV	NDRG3	1.77383	0.0443707	0.209033
SalineSIV	UBE3D	0.694478	0.0443926	0.266868
SalineSIV	MORC4	1.7199	0.0444829	0.103685
SalineSIV	SEPTIN8	0.69172	0.0446142	0.142277
SalineSIV	C4H6orf47	1.76979	0.0449961	0.121004
SalineSIV	CEP112	0.728915	0.0450626	0.327219
SalineSIV	LOC114674672	1.31968	0.0461325	0.126352
SalineSIV	DDAH2	1.1977	0.0461325	0.187508
SalineSIV	PDE8B	1.1028	0.047358	0.14669
SalineSIV	EXOC7	0.762037	0.047358	0.152208
SalineSIV	PPARD	0.558198	0.0478561	0.958713
SalineSIV	HS3ST1	0.565108	0.0478561	0.651388
SalineSIV	CEACAM3	0.579137	0.0478561	0.0828367
SalineSIV	LOC107000422	0.625901	0.0480987	0.19563
SalineSIV	LOC107000802	1.43404	0.0480987	0.122532
SalineSIV	NUDT8	0.578964	0.0482246	0.117261
SalineSIV	KIAA0100	0.820103	0.0485687	0.264188
SalineSIV	LOC106997221	2.42071	0.0486592	0.0919727
SalineSIV	LOC719029	1.7189	0.0486592	0.0836167
SalineSIV	RPL22L1	0.579595	0.0488635	0.317911
SalineSIV	STK38	0.896203	0.0492734	0.273674
SalineSIV	SPART	0.891153	0.0492734	0.271136
SalineSIV	AKAP8L	0.731972	0.0492734	0.272758
SalineSIV	SELENON	0.73703	0.0494884	0.113666

## Sheet: Activated
group_name	name	Log2FC	FDR	MeanDiff
Morphine	CLEC7A	2.05858	1.72117e-24	2.00927
Morphine	ASTN2	0.590475	3.64788e-16	11.8316
Morphine	KCNAB1	1.75815	2.62838e-15	1.27826
Morphine	ARHGAP26	0.548306	6.99422e-12	4.45414
Morphine	MNDA	0.542011	9.30721e-12	2.57702
Morphine	SMYD3	0.885158	2.35053e-11	2.07948
Morphine	LOC114676845	0.782164	2.35053e-11	1.86631
Morphine	PRCP	0.681364	2.35053e-11	1.72027
Morphine	RPS15A	0.805231	2.47777e-11	1.38865
Morphine	LOC698152	0.762574	3.50458e-11	0.921528
Morphine	DCAF6	0.823905	1.97161e-10	1.69359
Morphine	TSPAN7	1.26083	1.37577e-09	0.555224
Morphine	PRKD1	4.13053	1.48746e-09	0.753468
Morphine	FKBP5	0.551253	3.06016e-09	3.71778
Morphine	MAML3	0.571407	7.71325e-09	3.25674
Morphine	AKT3	0.62478	1.09691e-08	2.55989
Morphine	SEMA3C	1.32158	9.83845e-08	0.436566
Morphine	SMIM35	1.48098	1.31333e-07	0.388435
Morphine	EML1	0.86907	5.00706e-07	0.637378
Morphine	LOC114676844	0.870791	5.11386e-07	1.22263
Morphine	CDC5L	1.0334	8.31158e-07	0.44214
Morphine	RGS6	0.983902	1.32017e-06	1.14214
Morphine	CEP112	1.06065	1.32017e-06	0.56055
Morphine	SYNDIG1	0.560087	4.63593e-06	2.85801
Morphine	PLAG1	0.86744	9.77166e-06	0.569837
Morphine	SEPTIN9	1.58738	2.07966e-05	0.2828
Morphine	ROR2	0.744416	2.58613e-05	0.430303
Morphine	PGM5	0.518368	2.75327e-05	1.12782
Morphine	GABRG3	2.32807	2.77924e-05	0.628371
Morphine	PALLD	0.655799	3.70016e-05	0.430946
Morphine	TMC6	4.16066	3.80475e-05	0.158763
Morphine	TRPM8	0.75274	5.66018e-05	0.494948
Morphine	TRPS1	1.30649	8.28398e-05	0.459071
Morphine	CTTNBP2NL	0.521374	8.89932e-05	0.681092
Morphine	APAF1	0.559383	0.000126132	0.946418
Morphine	NR3C2	0.670982	0.000145142	0.992297
Morphine	CLEC1A	2.95525	0.000145142	0.209314
Morphine	CENPJ	0.872245	0.000145142	0.230044
Morphine	GABPB1	0.994887	0.000166188	0.43176
Morphine	NEDD9	0.645127	0.000227577	0.993154
Morphine	HIST1H1D	0.934436	0.000244388	0.5015
Morphine	HMGA2	1.27562	0.000262372	0.470867
Morphine	LOC106997985	0.715227	0.000296351	0.282884
Morphine	EMB	0.69021	0.000407077	0.401458
Morphine	CNTNAP4	3.57796	0.000450059	0.181347
Morphine	FNBP4	0.503196	0.00048108	0.506601
Morphine	AKAP6	0.960281	0.000647282	0.40865
Morphine	ZBTB44	0.830933	0.000757763	0.322366
Morphine	MOB1B	0.795767	0.000761718	0.409151
Morphine	ENAH	2.19869	0.000795344	0.182779
Morphine	SEPTIN8	0.975388	0.00101442	0.191366
Morphine	PNPT1	1.37307	0.00125865	0.31035
Morphine	STXBP6	1.47467	0.00142257	0.650731
Morphine	ANGPTL6	1.10438	0.00145209	0.165654
Morphine	TP63	0.834278	0.00154764	0.706185
Morphine	TNIK	2.66311	0.00154764	0.189412
Morphine	KCMF1	0.694962	0.00156013	0.546153
Morphine	P2RY14	2.09528	0.00170277	0.180714
Morphine	PAM	0.887781	0.00184579	0.333907
Morphine	NUPR2	1.00532	0.00192236	0.270927
Morphine	EGR3	0.573587	0.00206196	0.52208
Morphine	LOC106998259	0.533959	0.00262824	0.326099
Morphine	CAST	0.534968	0.00286512	0.460158
Morphine	TMEM156	0.501522	0.00293781	0.576805
Morphine	MPC2	0.935061	0.00315057	0.190552
Morphine	RPS6KA3	0.556293	0.00317347	0.664151
Morphine	THSD4	0.660262	0.00321755	0.681077
Morphine	ENPP1	0.911076	0.00337526	0.180981
Morphine	EPB41L5	2.89111	0.00370306	0.111228
Morphine	NAPA	1.75344	0.00408421	0.184857
Morphine	CUL1	0.549655	0.00425701	0.417659
Morphine	LOC106997387	1.19978	0.00468291	0.333881
Morphine	LOC114680581	1.64708	0.00468291	0.159884
Morphine	TMEM64	1.36587	0.00476724	0.214883
Morphine	PGGT1B	0.625478	0.00512457	0.352908
Morphine	LOC106995407	0.540595	0.00523419	0.239526
Morphine	LOC106999943	0.86412	0.00523419	0.235108
Morphine	NFIB	1.65072	0.00531534	0.48761
Morphine	MYOF	1.4389	0.00560269	0.114188
Morphine	CACNA2D1	2.57954	0.00575296	0.311472
Morphine	LOC114670379	0.828398	0.00587935	0.268199
Morphine	RNF150	0.618026	0.00597408	0.607994
Morphine	PLPP5	0.636044	0.00616128	0.151328
Morphine	LPAR1	1.1552	0.00623857	0.153302
Morphine	SACS	0.836182	0.00623857	0.211738
Morphine	PRDX6	0.645899	0.0066541	0.196224
Morphine	ZBTB34	0.947951	0.00693773	0.21517
Morphine	PAK1IP1	1.38041	0.0070979	0.15291
Morphine	LOC114673698	2.45681	0.00733585	0.103831
Morphine	AGK	0.624137	0.0076947	0.298446
Morphine	LOC114670137	1.7316	0.00778343	0.136122
Morphine	EID2B	5.01661	0.00892072	0.0627409
Morphine	CMPK1	0.744015	0.00895281	0.223077
Morphine	CHRNA7	0.859736	0.0108525	0.424624
Morphine	LMNB2	3.42907	0.0119523	0.0668814
Morphine	TNRC6C	0.568046	0.0119807	0.0956807
Morphine	RNF185	0.788891	0.0132732	0.160246
Morphine	DRG1	0.758186	0.0133144	0.1513
Morphine	KBTBD12	0.671411	0.01369	0.285571
Morphine	LDLRAD3	0.533034	0.0145177	0.248316
Morphine	VPS53	0.686009	0.0145177	0.298174
Morphine	LOC106995258	0.726916	0.0145177	0.205315
Morphine	BMP8B	0.988153	0.0149756	0.124901
Morphine	GTF3C4	1.75629	0.0152332	0.116376
Morphine	CCL2	1.30495	0.0152332	0.0817858
Morphine	PDE8B	0.632529	0.0155927	0.298142
Morphine	WDR43	0.637519	0.0155927	0.33584
Morphine	TRIM16	1.74228	0.0157084	0.0969203
Morphine	GPR31	1.61755	0.0157502	0.0705935
Morphine	SPTBN1	1.22967	0.0158717	0.104327
Morphine	LOC106994479	4.30697	0.016007	0.0760834
Morphine	TXNRD1	0.777495	0.0163025	0.199133
Morphine	GAREM1	4.08582	0.0163962	0.135833
Morphine	DROSHA	0.634353	0.0183826	0.264561
Morphine	USP42	0.527667	0.0198078	0.19072
Morphine	TCP11L1	0.957637	0.0198213	0.238758
Morphine	PRKAA1	0.889407	0.0200106	0.144628
Morphine	SPART	0.590636	0.0212246	0.142175
Morphine	SH3RF1	0.700454	0.0221782	0.316351
Morphine	LOC114676795	1.11705	0.0221985	0.124957
Morphine	LOC106994239	0.881658	0.0221985	0.328906
Morphine	TPK1	0.715542	0.022201	0.389906
Morphine	IFT88	0.565874	0.0225229	0.30094
Morphine	RFFL	0.520678	0.022974	0.246205
Morphine	ZNF281	0.668088	0.0231396	0.0937983
Morphine	BACH2	1.74543	0.0231396	0.203022
Morphine	GLDN	0.798789	0.0234916	0.262317
Morphine	NXN	1.17897	0.0235612	0.195708
Morphine	ZNF395	0.780099	0.023956	0.0821344
Morphine	IL21R	1.39465	0.0255588	0.165387
Morphine	LOC106996187	2.63285	0.0275096	0.0667011
Morphine	RBM45	1.29207	0.0275328	0.122433
Morphine	TSHZ2	1.31013	0.0280596	0.246927
Morphine	LOC107000198	0.858637	0.0283072	0.24864
Morphine	GPR39	0.758892	0.0283505	0.102403
Morphine	ACOT9	0.654481	0.0308774	0.121295
Morphine	CLDN1	0.874646	0.0331051	0.213916
Morphine	LOC107000196	1.56173	0.0331051	0.188098
Morphine	SERINC5	0.95147	0.0347571	0.228324
Morphine	NAB1	0.762609	0.0347571	0.207449
Morphine	CRHBP	2.83076	0.0349998	0.0701314
Morphine	MSH3	0.581606	0.0350521	0.431264
Morphine	LOC107000197	1.14659	0.0350521	0.177338
Morphine	PDCD2L	1.08566	0.0354226	0.0655517
Morphine	ZNF770	0.677948	0.0360606	0.0994597
Morphine	GNE	0.712936	0.0360606	0.11874
Morphine	FLT1	1.13996	0.0360606	0.300169
Morphine	BSDC1	0.509705	0.0363848	0.145035
Morphine	NIPA1	1.28409	0.0367994	0.102239
Morphine	TMTC4	0.781929	0.0368471	0.229458
Morphine	LSG1	0.706529	0.0371489	0.198153
Morphine	TMEM168	0.875195	0.0371489	0.215324
Morphine	KLHL42	0.821397	0.0375008	0.16077
Morphine	CADM2	0.96871	0.0376598	0.771783
Morphine	SMARCAL1	0.929314	0.0378176	0.15024
Morphine	EED	0.577329	0.0415708	0.506729
Morphine	LOC114676200	0.992125	0.0430524	0.0735232
Morphine	LOC106992273	0.73741	0.0439177	0.189997
Morphine	STARD5	1.99347	0.0446209	0.0815751
Morphine	NME7	1.16532	0.0450793	0.195481
Morphine	TTC33	0.773538	0.0472462	0.125318
Morphine	SF3B3	0.672688	0.0481279	0.208195
MorphineSIV	LOC693820	1.60491	1.70879e-28	1.34122
MorphineSIV	CLEC7A	2.15973	1.13694e-17	1.59966
MorphineSIV	LOC698152	1.24979	2.09125e-16	1.3321
MorphineSIV	HS3ST4	1.71987	6.52849e-15	3.05221
MorphineSIV	ARHGAP26	0.628381	7.23848e-12	5.2052
MorphineSIV	RPS15A	0.915269	7.43209e-10	1.56258
MorphineSIV	FKBP5	0.59204	3.07631e-09	4.55618
MorphineSIV	CPNE4	2.82745	4.04491e-09	0.460615
MorphineSIV	ATP13A3	0.867697	3.84117e-08	2.7537
MorphineSIV	MCL1	0.648804	5.31057e-08	1.29139
MorphineSIV	LOC106994692	3.09613	8.81659e-06	0.221976
MorphineSIV	RPL37	0.593994	1.11096e-05	0.799324
MorphineSIV	SEPTIN9	1.92353	2.21843e-05	0.283998
MorphineSIV	RTN1	0.6478	2.71138e-05	1.64996
MorphineSIV	TRPS1	1.64834	2.77812e-05	0.536387
MorphineSIV	RAB20	0.932117	2.77812e-05	1.28133
MorphineSIV	LOC114674664	2.7345	5.29706e-05	0.250079
MorphineSIV	LOC114673210	1.89131	8.74365e-05	0.272459
MorphineSIV	GASK1B	0.843805	0.000111448	0.920178
MorphineSIV	NXN	1.63254	0.000234211	0.393297
MorphineSIV	SQSTM1	0.997049	0.000246378	0.855382
MorphineSIV	PLEK	0.869022	0.000260507	2.58295
MorphineSIV	SLC25A33	0.522121	0.000308209	0.412225
MorphineSIV	RASGEF1B	0.536913	0.000365038	1.58156
MorphineSIV	NR4A3	1.01828	0.000472551	0.890888
MorphineSIV	CD163	0.710096	0.00051951	2.08979
MorphineSIV	MYO1D	2.05393	0.000537357	0.373164
MorphineSIV	YTHDF3	0.621065	0.000612997	0.826411
MorphineSIV	PARD3B	0.949092	0.000618348	0.825339
MorphineSIV	EGR3	0.661842	0.000825086	0.739392
MorphineSIV	LOC114676795	2.04592	0.000844554	0.265557
MorphineSIV	ARL5B	0.925792	0.00204692	0.610558
MorphineSIV	PPP2R2B	0.55805	0.00210529	0.68086
MorphineSIV	MSR1	0.731671	0.00210529	3.78886
MorphineSIV	MYO9A	0.585373	0.00218903	0.624525
MorphineSIV	LOC114669793	1.42178	0.00230254	0.252171
MorphineSIV	CLEC12A	0.880842	0.00248448	0.61551
MorphineSIV	TMEM237	4.81732	0.00281853	0.144349
MorphineSIV	RTKN2	1.24491	0.00342167	0.259069
MorphineSIV	KLF11	0.960551	0.00378062	0.325767
MorphineSIV	HYDIN	1.06967	0.00415852	0.384107
MorphineSIV	TSC22D2	0.524537	0.00465975	2.5219
MorphineSIV	RLF	0.54051	0.00609402	0.825191
MorphineSIV	LOC106998674	0.759376	0.00673349	0.597528
MorphineSIV	ZCCHC2	0.8262	0.00673349	0.396639
MorphineSIV	ANGPTL6	1.01089	0.00694145	0.149928
MorphineSIV	ZNF22	1.26189	0.00804389	0.147694
MorphineSIV	DCAF6	0.585199	0.00811389	1.07142
MorphineSIV	CEP128	0.506666	0.00821377	0.956482
MorphineSIV	KLHL15	0.576963	0.00945473	0.206736
MorphineSIV	MEF2D	0.680859	0.00974648	0.579747
MorphineSIV	MOB1B	0.854027	0.0154491	0.395422
MorphineSIV	LOC114679374	1.5653	0.0154491	0.213738
MorphineSIV	HIST1H1D	1.05473	0.015924	0.458116
MorphineSIV	HIF1A	0.547206	0.0180848	2.48839
MorphineSIV	CCT4	0.563192	0.0181013	0.276962
MorphineSIV	SLC45A4	1.07839	0.0215354	0.370403
MorphineSIV	PLEKHA5	1.7516	0.0215354	0.223981
MorphineSIV	LOC705327	3.23139	0.0224338	0.106115
MorphineSIV	USP16	0.687267	0.0229934	0.340388
MorphineSIV	LOC114674126	1.35466	0.0232522	0.124956
MorphineSIV	BASP1	0.592011	0.0260694	0.740283
MorphineSIV	ANXA11	1.01653	0.0265692	0.353506
MorphineSIV	ARHGAP6	0.516663	0.0288789	0.616451
MorphineSIV	CCL3	0.800393	0.0312952	0.728387
MorphineSIV	LOC708683	0.722952	0.0338141	0.38257
MorphineSIV	COL14A1	2.59211	0.0347379	0.144113
MorphineSIV	ADAMTSL2	1.19818	0.035648	0.15321
MorphineSIV	BCL6	0.505539	0.0383195	0.309354
MorphineSIV	NR1D2	0.631245	0.048067	0.513148
MorphineSIV	SNX18	0.563925	0.0487976	1.08843
MorphineSIV	LOC114674372	5.42558	0.0497053	0.0839589
MorphineSIV	THSD4	0.804818	0.0499649	0.869257
SalineSIV	LOC114673210	10.6826	1.62326e-46	95.5765
SalineSIV	ADORA2B	7.76142	1.2978e-39	4.94944
SalineSIV	MNDA	1.02826	2.50458e-39	5.86058
SalineSIV	RBPMS	9.80209	3.46952e-29	1.78347
SalineSIV	LOC100499503	6.28162	1.01555e-25	1.29205
SalineSIV	BMT2	3.98056	4.09652e-24	10.8401
SalineSIV	MYO1D	3.61351	1.99758e-22	1.14675
SalineSIV	LOC106998573	8.9887	4.98305e-22	1.01401
SalineSIV	RPL37	1.18186	1.34349e-21	1.76987
SalineSIV	ABR	0.766816	7.16233e-21	7.85773
SalineSIV	LOC106999000	4.55247	1.61762e-19	0.826921
SalineSIV	SRGN	0.664277	6.44502e-18	7.33421
SalineSIV	LOC114679371	5.11022	1.40162e-17	0.835103
SalineSIV	SLC11A1	1.01616	1.85035e-14	2.08384
SalineSIV	MAMU-A	1.61637	1.01534e-13	0.841857
SalineSIV	PLCB2	0.830736	7.86732e-12	1.53132
SalineSIV	LOC106995258	1.71531	1.27112e-11	0.694419
SalineSIV	OLR1	0.728772	2.73778e-11	3.71303
SalineSIV	NR4A1	1.20238	4.97735e-10	1.27678
SalineSIV	PRPF4B	0.705013	1.65678e-09	1.45609
SalineSIV	TMC6	4.74212	2.75383e-09	0.28075
SalineSIV	MYO1F	0.774983	2.94813e-09	1.49182
SalineSIV	BRD2	0.711938	3.31257e-09	1.11413
SalineSIV	MSR1	0.83492	5.19347e-09	3.70234
SalineSIV	CLEC7A	1.17489	5.19347e-09	1.1269
SalineSIV	LOC703641	0.62008	7.08501e-09	1.64687
SalineSIV	CTSB	0.725325	8.28601e-09	3.26986
SalineSIV	ATF4	0.781574	8.28601e-09	0.994418
SalineSIV	TNFRSF1B	0.742914	8.81948e-09	1.75019
SalineSIV	C1H1orf127	2.37513	1.37863e-08	0.49381
SalineSIV	SRRM2	0.581414	1.37863e-08	1.47201
SalineSIV	BTG2	0.64608	2.34516e-08	2.76626
SalineSIV	BRD9	1.06045	3.70085e-08	0.680636
SalineSIV	ZFP36	0.631491	3.97787e-08	3.58194
SalineSIV	ARG2	1.55808	4.69228e-08	0.567821
SalineSIV	ETS2	0.647352	5.8698e-08	1.74225
SalineSIV	LOC698152	0.863848	5.88792e-08	0.98992
SalineSIV	EGR3	1.10249	8.21641e-08	1.40422
SalineSIV	ITGB2	0.70938	1.98359e-07	0.935178
SalineSIV	LOC714964	1.48337	2.50901e-07	0.421425
SalineSIV	LOC697476	1.04162	2.50901e-07	0.726483
SalineSIV	CD74	0.623073	2.8776e-07	5.31961
SalineSIV	LOC716161	1.42503	3.13175e-07	0.721518
SalineSIV	GRASP	1.05561	3.15604e-07	1.04531
SalineSIV	TSPAN7	0.992768	3.30046e-07	0.361541
SalineSIV	PLEK	0.979565	4.28024e-07	2.71276
SalineSIV	ITM2C	0.597938	4.70579e-07	1.16973
SalineSIV	CEBPD	0.705097	9.78204e-07	1.10678
SalineSIV	CNDP2	0.935395	1.00498e-06	0.638633
SalineSIV	SCN1B	0.831161	1.10498e-06	0.621375
SalineSIV	TRPM2	1.07536	1.41015e-06	0.770765
SalineSIV	CD163	0.884125	1.84158e-06	2.41108
SalineSIV	MAMU-DRB5	0.931644	1.92015e-06	0.918602
SalineSIV	FTH1	0.527195	1.92015e-06	1.31636
SalineSIV	IL21R	1.89453	1.92015e-06	0.4165
SalineSIV	MCL1	0.592279	2.67643e-06	1.25271
SalineSIV	RPS15A	0.55609	3.16144e-06	0.990786
SalineSIV	PBRM1	0.572333	4.46124e-06	1.39758
SalineSIV	NLRP1	0.758678	4.47225e-06	0.919866
SalineSIV	PER1	0.725219	4.7537e-06	0.945115
SalineSIV	LOC106995967	0.882287	5.14704e-06	0.302122
SalineSIV	ST6GAL1	0.645699	5.50683e-06	1.34454
SalineSIV	NFKBID	0.90402	5.79581e-06	0.650871
SalineSIV	LOC106995137	1.0263	6.43362e-06	0.902169
SalineSIV	MLXIPL	0.722397	6.72147e-06	0.488418
SalineSIV	TMEM156	0.62328	1.03141e-05	0.870623
SalineSIV	NAIP	1.16001	1.30163e-05	0.737385
SalineSIV	MFSD1	0.641819	1.95514e-05	0.674572
SalineSIV	BCAS2	0.87641	2.07484e-05	0.385352
SalineSIV	ARHGEF10L	1.02525	2.24831e-05	0.440372
SalineSIV	EPSTI1	0.578622	2.25482e-05	1.4828
SalineSIV	ANGPTL6	1.42503	2.32573e-05	0.235462
SalineSIV	SNRNP70	0.71348	2.48845e-05	0.728596
SalineSIV	SUDS3	1.18882	2.87949e-05	0.401884
SalineSIV	RASL10A	0.684009	2.90463e-05	0.706151
SalineSIV	MAMU-DRA	0.566069	3.4471e-05	2.37441
SalineSIV	LOC106997985	1.05455	3.65684e-05	0.451962
SalineSIV	SLC2A3	1.08872	3.87688e-05	0.845201
SalineSIV	GAS6	0.718008	4.29315e-05	0.572474
SalineSIV	TCF25	0.534464	5.64084e-05	0.610455
SalineSIV	IER2	0.678163	6.57935e-05	1.91481
SalineSIV	DPP7	0.787386	8.01498e-05	0.578573
SalineSIV	MEF2D	0.784743	9.20693e-05	0.716154
SalineSIV	LUC7L	0.725946	9.83967e-05	0.49926
SalineSIV	ITPR1	0.606893	0.000100012	0.477074
SalineSIV	GADD45B	0.803714	0.000108972	0.599824
SalineSIV	DDX3Y	0.536357	0.000121616	1.37543
SalineSIV	SKI	0.688579	0.000128118	0.854585
SalineSIV	PDGFB	0.870008	0.000128336	1.02734
SalineSIV	RPL14	0.627631	0.000132145	0.373287
SalineSIV	APPL2	0.893043	0.000132962	2.82781
SalineSIV	STARD13	1.05818	0.000135528	0.581156
SalineSIV	RASGRP3	0.566443	0.000144339	0.869082
SalineSIV	NR4A2	0.540544	0.000173536	0.795394
SalineSIV	XYLT1	0.553485	0.000178419	0.9531
SalineSIV	HMGA2	1.12662	0.000188705	0.458205
SalineSIV	CLASRP	0.913898	0.000208366	0.380999
SalineSIV	LOC705327	4.79081	0.000234632	0.256644
SalineSIV	PPARD	0.554469	0.000258383	1.24049
SalineSIV	HNRNPL	0.647194	0.00025909	0.606696
SalineSIV	TUBB6	1.16444	0.000290341	0.309374
SalineSIV	CEMIP2	1.13409	0.000294186	0.415217
SalineSIV	RHOJ	1.00189	0.00030946	0.454566
SalineSIV	DDX50	0.733987	0.000313998	0.587183
SalineSIV	BCL7B	1.00373	0.00033951	0.314859
SalineSIV	TLCD2	1.49031	0.000341422	0.260003
SalineSIV	CLEC12A	0.983657	0.000359301	0.761941
SalineSIV	TNIK	3.13849	0.000367043	0.260127
SalineSIV	PIK3CD	0.50709	0.000389104	0.595789
SalineSIV	MAMU-DRB1	0.596471	0.000389104	1.73582
SalineSIV	CD44	1.66977	0.000391104	1.03392
SalineSIV	LOC693820	0.619685	0.000411559	0.229889
SalineSIV	LOC714576	0.912607	0.000446259	0.370846
SalineSIV	ERICH1	0.817762	0.000499166	0.667582
SalineSIV	CD68	1.186	0.000516108	0.403569
SalineSIV	TRIR	0.838921	0.000516108	0.308442
SalineSIV	SERPINF1	0.856431	0.000526545	0.575375
SalineSIV	JPT1	0.548982	0.00063533	0.631006
SalineSIV	CAST	0.61322	0.000650966	0.617485
SalineSIV	PPP6R2	0.639073	0.000650966	0.655328
SalineSIV	EPB41L5	6.60826	0.000650966	0.193126
SalineSIV	HAVCR2	0.514712	0.000752458	1.14496
SalineSIV	SRSF10	0.505689	0.000781549	0.525311
SalineSIV	DDX39A	0.939464	0.000829432	0.617595
SalineSIV	GLUL	0.680307	0.000881834	0.802128
SalineSIV	SATB1	0.619402	0.000934774	0.571071
SalineSIV	DOP1B	0.697406	0.000934774	0.640895
SalineSIV	TNK2	0.79492	0.000943588	0.484434
SalineSIV	MINK1	0.524683	0.00116742	1.00566
SalineSIV	PITPNA	0.581107	0.00129434	1.61929
SalineSIV	NR4A3	0.841559	0.00129501	0.630173
SalineSIV	XBP1	0.58379	0.00134762	0.54902
SalineSIV	CD37	0.522955	0.00142544	0.521145
SalineSIV	RNF122	0.751303	0.00143732	0.452006
SalineSIV	RPL29	0.768952	0.00144959	0.202762
SalineSIV	ROR2	0.968825	0.00144959	0.473748
SalineSIV	IL10RA	0.586081	0.00151232	0.644659
SalineSIV	SRI	0.538416	0.00170415	0.721383
SalineSIV	CTTN	1.56306	0.00176243	0.182703
SalineSIV	MLH3	1.81064	0.00186145	0.20145
SalineSIV	PXDC1	0.631263	0.0018926	0.820082
SalineSIV	SH2B3	0.527211	0.00192883	0.71359
SalineSIV	SMOX	2.34128	0.00198447	0.269804
SalineSIV	LOC713758	2.00648	0.00198447	0.153051
SalineSIV	ANKZF1	0.956262	0.00199255	0.21637
SalineSIV	RHBDF2	0.706265	0.00205136	0.479389
SalineSIV	PPAN	2.87846	0.0021465	0.136796
SalineSIV	LOC114674672	2.50913	0.00218098	0.160928
SalineSIV	LOC114676795	1.3119	0.00223342	0.205695
SalineSIV	SLC19A2	1.09724	0.002268	0.357696
SalineSIV	RPL4	0.571892	0.00240972	0.539862
SalineSIV	CNTNAP4	5.65772	0.00253244	0.0989654
SalineSIV	CCDC85B	0.669402	0.00260075	0.201676
SalineSIV	GUSBA	0.551359	0.00261895	0.436639
SalineSIV	FLCN	0.633501	0.00271176	0.220936
SalineSIV	PKN1	0.552277	0.00273479	0.597562
SalineSIV	FCGR2A	0.802445	0.00273846	0.528174
SalineSIV	LOC114676200	2.02736	0.0028039	0.127172
SalineSIV	TMED9	1.06812	0.00296261	0.291068
SalineSIV	PADI2	1.04716	0.00296733	0.66871
SalineSIV	LOC100425381	1.25826	0.00308787	0.147858
SalineSIV	CHRNA1	0.938093	0.00316785	0.383937
SalineSIV	YME1L1	0.617714	0.00318704	0.353674
SalineSIV	PLIN3	2.39922	0.00320823	0.139958
SalineSIV	RCC2	0.7763	0.00328882	0.337637
SalineSIV	PLD4	0.902787	0.00342462	0.289027
SalineSIV	ODF3B	1.21374	0.00342462	0.311764
SalineSIV	EGR2	0.808249	0.00342849	0.250022
SalineSIV	GGA3	0.849374	0.00342849	0.303775
SalineSIV	ARHGAP45	0.524632	0.0035415	0.404175
SalineSIV	ARHGEF11	0.818747	0.00372471	0.538488
SalineSIV	HPN	1.2858	0.00405711	0.225213
SalineSIV	ABTB1	1.53222	0.00407056	0.161352
SalineSIV	ABCE1	0.543958	0.00415419	0.49297
SalineSIV	LOC114672286	2.1808	0.00448007	0.135112
SalineSIV	MBOAT7	0.582675	0.00458229	0.32978
SalineSIV	FLOT1	0.684087	0.00462964	0.510577
SalineSIV	STK11IP	1.22505	0.00462964	0.173301
SalineSIV	SET	0.698651	0.00462964	0.502218
SalineSIV	COPS6	0.93887	0.00465511	0.245056
SalineSIV	DGKA	0.901304	0.00465708	0.32503
SalineSIV	PLEKHO1	0.530078	0.00484269	0.371999
SalineSIV	DDX18	0.766339	0.00496414	0.345018
SalineSIV	PQLC1	0.91895	0.00499998	0.478147
SalineSIV	UNC93B1	0.835805	0.0050786	0.376419
SalineSIV	STAT6	0.983512	0.00557711	0.277097
SalineSIV	ACSM5	0.669791	0.00579932	0.296449
SalineSIV	CD40	2.36984	0.00605074	0.188953
SalineSIV	TEP1	0.528364	0.00618778	0.514851
SalineSIV	FBL	1.14458	0.00618778	0.164147
SalineSIV	RASA4B	0.59275	0.00622718	0.217025
SalineSIV	LCP1	0.625818	0.00629863	1.08267
SalineSIV	PLEKHM2	0.547077	0.00633344	0.358313
SalineSIV	LOC100431023	1.9409	0.0063784	0.148768
SalineSIV	DCAF11	1.43004	0.00650789	0.156116
SalineSIV	P4HB	0.720627	0.00651373	0.227364
SalineSIV	SHPK	1.08203	0.00656443	0.221884
SalineSIV	NXN	1.20386	0.00698791	0.17473
SalineSIV	GPI	0.740498	0.00702234	0.236683
SalineSIV	USP4	0.689931	0.00743142	0.42107
SalineSIV	SLC45A4	0.669612	0.00750239	0.300293
SalineSIV	CLSTN3	0.968193	0.00809796	0.215858
SalineSIV	RRAS2	1.70911	0.00811439	0.0725592
SalineSIV	DOK1	0.780183	0.00816025	0.232559
SalineSIV	LIMK2	1.10402	0.00853756	0.360678
SalineSIV	ADAMTSL2	1.50457	0.00868345	0.181045
SalineSIV	NEDD9	0.548542	0.00879352	0.877874
SalineSIV	UBAP2L	0.562178	0.00888144	0.30468
SalineSIV	UBE4A	0.590514	0.00923122	0.250973
SalineSIV	PHKG2	0.814199	0.00928418	0.244817
SalineSIV	FHOD1	0.575771	0.00928418	0.373589
SalineSIV	BTK	0.592114	0.00953615	0.304109
SalineSIV	ZNF330	0.69901	0.00994462	0.309857
SalineSIV	NOC3L	0.572834	0.00994462	0.2881
SalineSIV	CALHM6	1.09732	0.00999892	0.184464
SalineSIV	LOC114676800	2.24175	0.0100078	0.118377
SalineSIV	ELOVL1	1.14676	0.010513	0.278313
SalineSIV	SAT2	0.954242	0.0106556	0.195116
SalineSIV	C2	1.25258	0.0106971	0.238475
SalineSIV	TMEM106C	1.1596	0.0108013	0.191631
SalineSIV	MX1	1.11545	0.0109178	0.286916
SalineSIV	CEP295	0.541986	0.0112701	0.35392
SalineSIV	U2AF1	0.506978	0.0115116	0.538662
SalineSIV	RAB11FIP5	0.811948	0.0115603	0.621638
SalineSIV	MRPL33	0.714419	0.0117338	0.179531
SalineSIV	PDPN	0.659421	0.0118004	0.600634
SalineSIV	TMX3	0.716784	0.0128922	0.300044
SalineSIV	COQ6	2.80314	0.0135363	0.130058
SalineSIV	RNPC3	0.507739	0.0138309	0.428225
SalineSIV	HK2	0.530975	0.0138688	1.69592
SalineSIV	LOC114671012	1.9873	0.0143984	0.132688
SalineSIV	AKAP11	0.792372	0.014502	0.369471
SalineSIV	ETAA1	0.966471	0.0146445	0.314358
SalineSIV	OTUD5	0.799894	0.0146445	0.192653
SalineSIV	TFRC	0.911616	0.0148811	0.435519
SalineSIV	TMIGD3	0.671264	0.015351	0.329139
SalineSIV	PCED1A	1.57959	0.015351	0.175723
SalineSIV	DDX27	0.636859	0.0159458	0.16739
SalineSIV	STK40	0.688624	0.0159802	0.218019
SalineSIV	CDV3	0.516115	0.0160391	0.658755
SalineSIV	FIGNL1	1.70507	0.0163504	0.0671794
SalineSIV	EFEMP2	0.958328	0.0163504	0.161306
SalineSIV	ODC1	0.53282	0.0164137	0.54902
SalineSIV	MX2	0.683657	0.0166848	0.431339
SalineSIV	GPS1	1.15837	0.0167306	0.137944
SalineSIV	PRRG1	1.81933	0.0167306	0.100027
SalineSIV	LGALS12	1.37082	0.0168264	0.129898
SalineSIV	SGTA	0.935335	0.0169356	0.245352
SalineSIV	HEXD	1.18074	0.0171851	0.199983
SalineSIV	GRAMD1A	0.534568	0.0175064	0.277812
SalineSIV	THEMIS2	0.840079	0.0185037	0.302767
SalineSIV	LOC114680346	1.16248	0.0185898	0.12439
SalineSIV	TBC1D16	0.608676	0.0187774	0.208941
SalineSIV	DUT	0.693098	0.0188883	0.224927
SalineSIV	NME2	0.59467	0.0189013	0.27872
SalineSIV	HEG1	0.911539	0.0191827	0.316797
SalineSIV	TAF2	0.526706	0.0194984	0.275023
SalineSIV	TENT5A	1.33693	0.0195662	0.254387
SalineSIV	TDG	0.552062	0.0195662	0.241219
SalineSIV	MTCH1	0.58355	0.019977	0.221763
SalineSIV	TP63	0.625068	0.0203113	0.517968
SalineSIV	RASSF2	0.522635	0.0206776	0.206082
SalineSIV	AP3D1	0.775199	0.0206776	0.290359
SalineSIV	LOC709765	3.63949	0.0209044	0.0856849
SalineSIV	WDR81	0.681759	0.0214579	0.320917
SalineSIV	KHNYN	1.20429	0.0217373	0.178604
SalineSIV	LOC708096	1.06657	0.0217994	0.133674
SalineSIV	HSD11B1L	1.45518	0.0218875	0.0962709
SalineSIV	ASB2	1.20633	0.0221969	0.139357
SalineSIV	IRAK1	1.05147	0.0226158	0.14738
SalineSIV	UBALD2	0.817729	0.0226914	0.242232
SalineSIV	SLC11A2	0.556359	0.0228588	0.485041
SalineSIV	RAB20	0.609082	0.0231449	0.640081
SalineSIV	LOC698693	1.01177	0.0235068	0.325988
SalineSIV	DEXI	1.93883	0.0236584	0.177453
SalineSIV	RGS19	0.505857	0.0239015	0.314565
SalineSIV	ST3GAL1	0.585873	0.023973	0.661332
SalineSIV	GAPDH	0.633307	0.0241166	0.472061
SalineSIV	IMP4	1.83307	0.0241166	0.116784
SalineSIV	RAD23A	0.806304	0.0243254	0.225892
SalineSIV	PRELID1	1.36103	0.0243825	0.214889
SalineSIV	LAMB2	1.29679	0.0246438	0.0977377
SalineSIV	CAMTA2	0.963057	0.0248605	0.213484
SalineSIV	APOL6	2.17276	0.0248638	0.130604
SalineSIV	EIF2B4	1.71027	0.0250608	0.124791
SalineSIV	DEF8	0.983362	0.0254366	0.157535
SalineSIV	CCL8	1.70642	0.0256071	0.15693
SalineSIV	USP18	2.32492	0.0263345	0.146648
SalineSIV	SERPINB9	1.12061	0.0266077	0.29356
SalineSIV	VEZF1	0.762861	0.026735	0.380976
SalineSIV	FLII	1.16508	0.0277474	0.17316
SalineSIV	SEMA3C	0.843832	0.0279487	0.125664
SalineSIV	SLC2A11	0.634629	0.028065	0.250375
SalineSIV	POLG	1.32971	0.0280999	0.171994
SalineSIV	PSMD3	0.927976	0.028193	0.103336
SalineSIV	ORAI2	0.940451	0.0288268	0.18109
SalineSIV	FCGR2B	1.45049	0.0289461	0.0799498
SalineSIV	SNN	1.76438	0.0303483	0.15823
SalineSIV	SF3A1	0.744316	0.0308619	0.155124
SalineSIV	EXOC7	1.25002	0.0308619	0.20501
SalineSIV	CCNK	0.665891	0.0310724	0.300473
SalineSIV	SCAMP4	1.37885	0.0315888	0.134857
SalineSIV	PIM3	2.38631	0.0316268	0.0758431
SalineSIV	TMC8	2.04325	0.0317801	0.0719952
SalineSIV	LOC106994692	3.03043	0.0318261	0.161251
SalineSIV	SPART	0.805455	0.0319385	0.171008
SalineSIV	DPH7	1.45888	0.0321237	0.159929
SalineSIV	CWC25	1.01529	0.0321437	0.281846
SalineSIV	PLEKHO2	0.867563	0.0322095	0.191791
SalineSIV	PRXL2A	1.00021	0.0322095	0.20355
SalineSIV	CCDC151	1.00585	0.0323452	0.0903102
SalineSIV	KPNB1	0.629913	0.0330555	0.482845
SalineSIV	LOC114676345	2.35819	0.0350154	0.147712
SalineSIV	DDIT3	0.54998	0.0353254	0.444216
SalineSIV	TANGO2	0.97753	0.0354417	0.221799
SalineSIV	CCDC88B	1.12208	0.0366349	0.22204
SalineSIV	ZNF614	0.584335	0.0366349	0.285542
SalineSIV	ATXN2L	0.540202	0.0366349	0.323939
SalineSIV	QARS	0.74381	0.0372219	0.121511
SalineSIV	NAA35	0.503715	0.0373851	0.324272
SalineSIV	LARP1	0.550917	0.0375078	0.483095
SalineSIV	POU2F2	0.543621	0.0377191	0.32321
SalineSIV	PDK4	1.03339	0.0377631	0.569367
SalineSIV	ADA2	0.748212	0.0377631	0.260116
SalineSIV	STOML2	1.36935	0.0379593	0.0949225
SalineSIV	C10H20orf194	0.550568	0.0386782	0.604991
SalineSIV	RNF220	1.27128	0.0387482	0.173836
SalineSIV	LOC677692	3.83365	0.0400821	0.0719329
SalineSIV	PTPN13	1.55758	0.0406253	0.103542
SalineSIV	PGAM1	0.676811	0.0407842	0.118496
SalineSIV	NAGK	0.611834	0.0408487	0.279092
SalineSIV	INPP5K	0.663078	0.041085	0.285083
SalineSIV	CAMKK2	0.522641	0.0413331	0.169982
SalineSIV	PSMD12	0.881125	0.0440652	0.258824
SalineSIV	TBX10	1.01799	0.044378	0.224617
SalineSIV	SHARPIN	0.602786	0.0445258	0.133007
SalineSIV	NCF1	0.686812	0.0451668	0.271485
SalineSIV	TEF	1.38975	0.0451668	0.0731978
SalineSIV	LRP8	0.620232	0.0453007	0.0929142
SalineSIV	CMTR2	0.693147	0.0465373	0.359115
SalineSIV	LOC712349	2.7062	0.0466641	0.102762
SalineSIV	DAPK1	1.71151	0.0470831	0.237874
SalineSIV	WDR60	0.702783	0.0478871	0.171683
SalineSIV	NSMCE3	1.08572	0.0486917	0.149177
SalineSIV	EXD3	0.937156	0.0486917	0.177503
SalineSIV	LOC712661	0.83516	0.0486917	0.261945
SalineSIV	STRADA	0.77138	0.0486917	0.318738
SalineSIV	KIRREL3	0.954917	0.0488407	0.151866
SalineSIV	LOC719029	1.3093	0.0495542	0.105253
SalineSIV	MOB3B	1.52859	0.0498819	0.175101

## Sheet: Antiviral
group_name	name	Log2FC	FDR	MeanDiff
Morphine	CLEC7A	3.87979	6.55488e-23	1.76686
Morphine	ASTN2	0.664219	3.35524e-16	11.794
Morphine	ARHGAP26	0.688157	2.67743e-10	3.37178
Morphine	FAM149A	0.585257	5.58167e-10	3.86027
Morphine	PRKD1	7.98227	5.58167e-10	0.64749
Morphine	PRCP	0.706474	1.29593e-09	1.75404
Morphine	LRRK2	0.714782	3.11513e-09	1.86006
Morphine	KCNAB1	1.97144	1.0565e-08	0.833572
Morphine	SMIM35	1.40279	2.90541e-08	0.496165
Morphine	LOC114676845	0.810284	7.04971e-08	1.80585
Morphine	SEPTIN9	2.83069	5.76523e-07	0.33117
Morphine	TSHZ2	2.08922	9.45944e-07	0.768712
Morphine	AKT3	1.02121	2.93492e-06	2.38668
Morphine	SMYD3	0.595223	1.25347e-05	1.68633
Morphine	ASPH	0.712216	1.95727e-05	0.719323
Morphine	LOC698152	0.779133	2.3594e-05	0.806533
Morphine	NCK2	0.585833	3.79836e-05	1.33734
Morphine	RASGRP3	0.546611	6.50052e-05	0.876933
Morphine	TP63	1.41768	0.000128584	0.902407
Morphine	SNX19	1.31767	0.000128584	0.319734
Morphine	RPS15A	0.507607	0.000170653	0.916742
Morphine	RGS6	1.21	0.000232268	1.05075
Morphine	STX6	0.995184	0.000337581	0.526376
Morphine	LOC106995967	0.83732	0.00035807	0.235221
Morphine	HIST1H2AC	0.635943	0.000367225	2.27597
Morphine	PGGT1B	0.86638	0.00038873	0.534008
Morphine	TCF20	0.651517	0.000504526	0.320294
Morphine	UBASH3B	0.607612	0.000536961	1.15692
Morphine	CREB1	0.706926	0.000668749	0.832706
Morphine	HPN	2.40082	0.000788473	0.301953
Morphine	DCAF6	0.57606	0.00112337	1.00705
Morphine	PRKCH	0.543731	0.00112337	1.45102
Morphine	LOC106997985	0.707936	0.00113387	0.208447
Morphine	PALLD	0.675091	0.00113387	0.420145
Morphine	LOC107000198	1.52197	0.00113387	0.27739
Morphine	CENPJ	1.12774	0.00113387	0.237247
Morphine	LOC106999943	1.43306	0.00118352	0.380612
Morphine	SNX4	0.723977	0.00122845	0.413993
Morphine	CAMSAP1	0.675358	0.00159451	0.250293
Morphine	RPL37	0.805851	0.00167538	0.955899
Morphine	NVL	0.785688	0.00175949	0.35497
Morphine	CEP112	0.901743	0.00175949	0.444634
Morphine	EMB	0.747293	0.00189867	0.477126
Morphine	LOC106992862	0.938779	0.00194796	0.531833
Morphine	TRIM44	0.678711	0.00219461	0.669379
Morphine	CCSER2	0.747727	0.00220678	0.431805
Morphine	MOB3B	1.74248	0.00228827	0.314984
Morphine	ULK4	0.752507	0.00235399	0.522081
Morphine	CCNY	0.555373	0.00255517	0.704215
Morphine	PPP2R5C	0.535208	0.0025745	0.82371
Morphine	ERI1	0.625496	0.00268881	0.248888
Morphine	EXPH5	1.481	0.00286197	0.282442
Morphine	DMXL2	0.689086	0.002867	0.431543
Morphine	ATF2	0.714279	0.00299277	0.506842
Morphine	DICER1	0.817624	0.00312561	0.414294
Morphine	ZMIZ1	0.87061	0.00401345	0.280567
Morphine	CCL8	1.39917	0.00421828	0.133733
Morphine	TRPC3	0.505597	0.00498996	0.451987
Morphine	VTA1	0.779572	0.00501629	0.411256
Morphine	BVES	0.850146	0.00556972	0.403294
Morphine	ZNF532	0.500632	0.00556972	0.543328
Morphine	CTNNA1	0.545582	0.00590291	0.760111
Morphine	COG6	0.984752	0.00646643	0.381665
Morphine	TMTC4	0.737854	0.00646725	0.237724
Morphine	MTHFR	0.572348	0.00674778	0.28607
Morphine	CERS5	1.27564	0.00729644	0.197226
Morphine	ZNF559	1.0785	0.00924618	0.18079
Morphine	FER1L5	3.43937	0.00975772	0.0883708
Morphine	VPS41	0.627659	0.0113302	0.414861
Morphine	FRMD3	0.51795	0.0116259	0.574724
Morphine	LOC693611	3.06369	0.0116259	0.109337
Morphine	CLSTN1	0.519541	0.0117686	0.465923
Morphine	AGFG1	0.565636	0.0117686	0.447781
Morphine	CPSF6	0.54874	0.0127561	0.566036
Morphine	UTP20	1.23825	0.013129	0.325745
Morphine	CCDC7	0.671172	0.0135624	0.664468
Morphine	HECA	0.701548	0.0141093	0.294692
Morphine	PURG	1.13316	0.0161737	0.128927
Morphine	LOC114676844	0.615342	0.016182	0.994269
Morphine	ROR2	0.690683	0.0164664	0.629441
Morphine	2025-03-02	1.35785	0.0165582	0.199545
Morphine	NR3C2	0.581438	0.0165582	0.766046
Morphine	LOC694372	0.892917	0.0169029	0.12434
Morphine	HACE1	0.86786	0.0173922	0.371672
Morphine	LOC114676795	1.53838	0.0180912	0.178064
Morphine	NMT2	1.08688	0.0184502	0.298239
Morphine	CUL1	0.580132	0.0191628	0.401401
Morphine	MSH3	0.657321	0.0191637	0.463161
Morphine	ICE2	0.739832	0.0195068	0.257001
Morphine	TNFSF10	1.72409	0.0198244	0.140348
Morphine	AHCYL2	0.907784	0.0198244	0.372433
Morphine	UFL1	0.856233	0.0198244	0.3048
Morphine	CXCL8	0.95257	0.0198244	0.533808
Morphine	ATG16L1	1.10895	0.0198244	0.205113
Morphine	KATNAL1	0.641888	0.0198244	0.270799
Morphine	NFIB	1.59624	0.0203366	0.369432
Morphine	ELP3	0.791261	0.0207211	0.291897
Morphine	AIG1	0.532888	0.02138	0.533431
Morphine	SFXN1	1.13627	0.0214766	0.152897
Morphine	LMBR1	0.56681	0.0218212	0.309628
Morphine	SHQ1	1.10132	0.0227614	0.245081
Morphine	DOP1B	0.599645	0.0227614	0.455706
Morphine	PAPPA	1.54803	0.0229117	0.172194
Morphine	ZCCHC14	0.593677	0.0230666	0.148005
Morphine	SGPL1	0.603892	0.0238131	0.594977
Morphine	SEPTIN8	0.857254	0.0239573	0.215364
Morphine	LOC106993834	1.75946	0.0239931	0.197217
Morphine	CRYBG3	0.543268	0.0245001	0.444178
Morphine	THSD4	0.970555	0.0245001	0.718904
Morphine	CMPK1	0.694615	0.0255181	0.230108
Morphine	RIF1	0.666148	0.0255181	0.434441
Morphine	ZNF704	1.82805	0.0276875	0.135929
Morphine	RFLNB	1.65031	0.0279574	0.117238
Morphine	SH3PXD2A	0.667511	0.0279867	0.259423
Morphine	PPP2R2B	0.98864	0.0280844	0.553467
Morphine	CLEC1A	3.77569	0.0289019	0.0836024
Morphine	GPRASP1	0.803467	0.0289019	0.258847
Morphine	PTPRB	1.2189	0.0291288	0.165219
Morphine	TPST2	2.78624	0.029552	0.0831265
Morphine	ACLY	0.551648	0.029552	0.178856
Morphine	UBE2F	0.633711	0.0299228	0.203063
Morphine	DROSHA	0.755464	0.0300397	0.347306
Morphine	MFF	0.639297	0.0301287	0.519956
Morphine	FAM199X	0.778603	0.0301287	0.165163
Morphine	PDZD8	0.762539	0.030216	0.507388
Morphine	KDM5A	0.555645	0.030216	0.343936
Morphine	BOC	1.04808	0.031128	0.149533
Morphine	TMEM38A	5.15082	0.031128	0.0887571
Morphine	TANGO6	0.612198	0.031128	0.366675
Morphine	PPP2R5A	0.610899	0.0315944	0.263589
Morphine	NFXL1	0.746782	0.0331468	0.228283
Morphine	LOC106994778	0.833184	0.0331468	0.30202
Morphine	RBM7	0.609192	0.0332292	0.127315
Morphine	NOD1	0.839835	0.0332864	0.331589
Morphine	LOC106995258	0.729562	0.0332864	0.181002
Morphine	BTBD10	0.758943	0.0350789	0.414699
Morphine	ABCA1	1.04202	0.0351328	0.245682
Morphine	ZNF564	1.08295	0.036301	0.214273
Morphine	AMOT	0.786024	0.0364069	0.320399
Morphine	CD244	0.640828	0.0380838	0.252755
Morphine	CHRNA7	0.517717	0.0384029	0.253286
Morphine	NCOA6	0.530177	0.0386061	0.348637
Morphine	ACP6	1.36073	0.0392011	0.109101
Morphine	P2RY14	1.38904	0.0392011	0.221251
Morphine	AGPAT5	0.556585	0.039639	0.257662
Morphine	CNTNAP4	3.49144	0.0396431	0.108993
Morphine	NUP54	0.732231	0.0403465	0.249793
Morphine	GABRG3	1.92624	0.0403465	0.412757
Morphine	CCL2	1.24173	0.0408249	0.114125
Morphine	COIL	0.607682	0.0412279	0.116013
Morphine	LOC711652	1.1789	0.0418408	0.129739
Morphine	CAPRIN2	0.825042	0.0420764	0.194349
Morphine	C1H1orf127	1.1605	0.043396	0.160314
Morphine	TAL2	5.01197	0.0435206	0.080377
Morphine	LOC107000823	0.977619	0.0435688	0.186107
Morphine	EFCC1	0.79817	0.0435688	0.157759
Morphine	RNF150	0.511187	0.0435688	0.372254
Morphine	KRCC1	0.637123	0.0435688	0.294522
Morphine	LOC114673087	0.71192	0.0435688	0.416736
Morphine	NAA15	0.524192	0.0440013	0.330124
Morphine	MTMR10	0.504016	0.0440313	0.379256
Morphine	OTULIN	0.687105	0.0447065	0.32219
Morphine	ARHGEF11	0.581735	0.0481951	0.316162
Morphine	PIGB	0.812009	0.0489567	0.164772
Morphine	MTMR9	0.620048	0.0494934	0.23706
Morphine	SLC25A29	0.582288	0.0495101	0.207165
Morphine	STRBP	0.507359	0.0495101	0.518674
MorphineSIV	LOC693820	2.38873	4.05663e-35	1.82242
MorphineSIV	CLEC7A	3.78947	1.3592e-22	1.47321
MorphineSIV	FKBP5	0.763619	1.03858e-12	5.29717
MorphineSIV	RTN1	1.2326	8.29994e-12	2.42831
MorphineSIV	RPL37	0.977894	2.28876e-08	1.25441
MorphineSIV	LOC114679374	3.31277	4.75042e-08	0.456251
MorphineSIV	PPP2R2B	1.7843	1.09165e-07	1.42689
MorphineSIV	ATP13A3	1.39295	1.2092e-07	2.79335
MorphineSIV	SEPTIN9	3.05212	1.36363e-07	0.579039
MorphineSIV	RPL37A_1	0.580128	1.79802e-07	1.51698
MorphineSIV	PARD3B	1.35701	5.76591e-07	1.03844
MorphineSIV	GASK1B	1.15066	4.34047e-06	1.09119
MorphineSIV	LOC698152	0.895791	1.20407e-05	0.973506
MorphineSIV	RPS15A	0.786213	2.8463e-05	1.63828
MorphineSIV	CD163	0.829866	5.39294e-05	2.57614
MorphineSIV	CPNE4	2.19597	0.000111969	0.34322
MorphineSIV	AKT3	0.802472	0.000124397	1.69334
MorphineSIV	ARHGAP26	0.509383	0.000172162	2.59658
MorphineSIV	THSD4	1.63612	0.000210012	1.18985
MorphineSIV	ARHGAP10	2.05895	0.000680282	0.319761
MorphineSIV	UGGT2	3.04993	0.000792124	0.321069
MorphineSIV	HS3ST4	0.620282	0.00145402	0.69411
MorphineSIV	LOC106997985	1.07115	0.00221279	0.343798
MorphineSIV	NXN	1.21287	0.00248795	0.284454
MorphineSIV	MEF2D	0.714425	0.00443029	0.500743
MorphineSIV	HIF1A	0.731817	0.00679718	3.2778
MorphineSIV	ADGRL2	1.78072	0.00720072	0.634987
MorphineSIV	MPRIP	1.13532	0.00772935	0.342128
MorphineSIV	LOC114673210	1.72983	0.00818641	0.259598
MorphineSIV	LOC107000817	0.875763	0.00838153	0.48732
MorphineSIV	CTBP2	0.559597	0.00840806	1.13226
MorphineSIV	MYO1D	3.44513	0.00984295	0.214312
MorphineSIV	DOP1B	0.565526	0.0101061	0.42858
MorphineSIV	CD80	0.806259	0.0104896	0.9515
MorphineSIV	MTHFR	1.11519	0.0122216	0.466821
MorphineSIV	LOC106998674	1.03606	0.0129262	0.415437
MorphineSIV	MAMU-DPB	1.20102	0.015931	0.24172
MorphineSIV	ANXA11	1.31871	0.0159919	0.335707
MorphineSIV	LOC114679375	1.65793	0.016564	0.262289
MorphineSIV	RNF122	0.985125	0.016564	0.404892
MorphineSIV	LOC697476	0.552101	0.0168089	0.354189
MorphineSIV	LOC106995967	0.693394	0.0187621	0.180891
MorphineSIV	TRPS1	2.53002	0.0187621	0.364499
MorphineSIV	RAB20	0.83943	0.0211296	1.0219
MorphineSIV	FBXO34	0.611552	0.0218522	0.879614
MorphineSIV	PIK3AP1	0.561662	0.0225197	1.80169
MorphineSIV	PPP1R15A	0.889627	0.0275625	0.423699
MorphineSIV	NEO1	1.64329	0.0289414	0.28247
MorphineSIV	LOC100426537	0.641307	0.0289414	0.635038
MorphineSIV	SDCBP	0.519015	0.0290527	0.649769
MorphineSIV	ZNF704	3.09724	0.0290527	0.22883
MorphineSIV	IST1	0.612466	0.0290527	0.49636
MorphineSIV	MFSD1	0.551994	0.0333925	0.541657
MorphineSIV	YTHDF3	0.650028	0.0333925	0.842108
MorphineSIV	EXT2	0.944286	0.0371902	0.293344
MorphineSIV	SATB2	4.02378	0.0382012	0.123627
MorphineSIV	FAM227A	3.32759	0.0390832	0.115092
SalineSIV	LOC114673210	9.95947	2.88909e-50	115.783
SalineSIV	ADORA2B	8.10926	1.62327e-45	7.2383
SalineSIV	MNDA	1.06222	1.02116e-34	5.44651
SalineSIV	RBPMS	10.0489	1.13969e-33	2.11656
SalineSIV	LOC100499503	5.62343	3.63091e-27	1.52968
SalineSIV	BMT2	3.96859	6.97601e-26	13.2884
SalineSIV	LOC106998573	9.23826	6.75396e-25	1.20588
SalineSIV	LOC114679371	6.43483	6.20059e-24	1.21453
SalineSIV	RPL37	1.39001	4.49741e-23	1.91089
SalineSIV	CLEC7A	3.4068	5.42562e-17	1.24509
SalineSIV	LOC697476	1.38106	3.33986e-13	1.08029
SalineSIV	MYO1D	4.45336	9.01411e-13	0.509188
SalineSIV	LOC106995258	1.72905	7.89988e-11	0.758474
SalineSIV	ZFP36L1	0.531041	2.26682e-10	8.05294
SalineSIV	LOC106999000	6.44674	7.45864e-10	0.398457
SalineSIV	RPS15A	0.784832	1.85433e-09	1.50101
SalineSIV	MAMU-A	1.25155	2.29449e-09	0.801151
SalineSIV	ABR	0.612857	2.35259e-09	4.88823
SalineSIV	LOC703641	0.587758	3.15769e-09	2.19143
SalineSIV	LOC718777	0.89599	1.02096e-08	0.986541
SalineSIV	RPL23A	0.506558	1.77468e-08	1.80711
SalineSIV	LOC106997985	1.4368	4.55231e-08	0.45048
SalineSIV	TMC6	3.67909	1.60932e-07	0.298854
SalineSIV	LOC705327	5.37932	2.27713e-07	0.33578
SalineSIV	ATF4	0.728555	3.48027e-07	0.925116
SalineSIV	SCN1B	0.866782	7.55674e-07	0.831797
SalineSIV	FTH1	0.505185	1.50767e-06	1.31315
SalineSIV	ETS2	0.685581	2.29984e-06	1.82361
SalineSIV	LOC693820	1.06641	3.0349e-06	0.390655
SalineSIV	ZFP36	0.540793	4.61427e-06	2.63347
SalineSIV	SLC11A1	0.90274	6.26169e-06	1.29176
SalineSIV	IL6R	0.706551	6.77006e-06	1.00567
SalineSIV	LOC716161	0.917206	7.64171e-06	0.789227
SalineSIV	TMTC2	5.0955	9.06704e-06	0.217633
SalineSIV	CD163	0.834246	1.03374e-05	2.76528
SalineSIV	OLR1	0.502616	1.55728e-05	1.85124
SalineSIV	LOC114674672	2.74192	3.11454e-05	0.208326
SalineSIV	PDIA3	0.557872	3.81056e-05	0.742645
SalineSIV	TMEM106C	1.49757	4.07713e-05	0.312804
SalineSIV	RHOB	0.586141	4.96976e-05	1.76777
SalineSIV	EGR3	0.985668	5.65233e-05	0.883526
SalineSIV	EEF1A1	0.615554	5.78222e-05	1.05033
SalineSIV	FCGR2A	0.933231	6.93123e-05	0.658464
SalineSIV	PDGFB	0.708466	8.25389e-05	0.827826
SalineSIV	SF3B5	1.56761	8.49909e-05	0.350169
SalineSIV	CALHM6	1.81052	8.63389e-05	0.419381
SalineSIV	RHBDF2	0.661913	8.63389e-05	0.622863
SalineSIV	ARG2	1.07351	8.63429e-05	0.424602
SalineSIV	CEBPD	0.63494	8.74516e-05	1.13225
SalineSIV	LOC100426537	0.938617	9.0888e-05	0.974295
SalineSIV	TNFRSF1B	0.524582	0.000119272	1.25935
SalineSIV	MAMU-DRB1	0.805045	0.000119272	1.08473
SalineSIV	RPL4	0.751504	0.000133352	0.763514
SalineSIV	FUS	0.563633	0.000159327	0.839294
SalineSIV	HPN	2.71808	0.000164025	0.254874
SalineSIV	LOC714964	0.709145	0.000172757	0.270273
SalineSIV	LOC114673461	3.83608	0.000180844	0.207398
SalineSIV	NFKBID	1.12622	0.000181944	0.576092
SalineSIV	ITM2C	0.534536	0.000188168	1.5195
SalineSIV	RPS25	0.582395	0.000232067	0.789604
SalineSIV	GAS6	0.759637	0.000232067	0.644033
SalineSIV	LOC106998259	1.0055	0.000233839	0.705938
SalineSIV	TAF1D	0.554703	0.000263941	0.412656
SalineSIV	BRD9	0.662923	0.000273224	0.496583
SalineSIV	TNS3	0.555571	0.000336373	1.02727
SalineSIV	IL21R	2.14179	0.000341038	0.365752
SalineSIV	LUC7L	0.670538	0.000369114	0.489172
SalineSIV	CD44	2.1818	0.000457782	0.51614
SalineSIV	NFIC	0.53605	0.00047408	0.968558
SalineSIV	ARHGAP17	0.580966	0.00047408	0.770346
SalineSIV	CPOX	0.816243	0.000582866	0.357404
SalineSIV	SLC25A3	0.724756	0.000610049	0.506854
SalineSIV	SERPINA1	0.550664	0.000693547	1.28578
SalineSIV	NINJ1	0.552833	0.00074986	0.689101
SalineSIV	NR4A1	1.058	0.000895369	0.654517
SalineSIV	LOC106995967	0.689054	0.000999292	0.230033
SalineSIV	CDH4	1.15623	0.00105501	0.24244
SalineSIV	C1H1orf127	1.45616	0.00106104	0.203592
SalineSIV	USP22	0.71554	0.00120687	0.493277
SalineSIV	LOC721591	2.46526	0.00132295	0.203156
SalineSIV	SEPTIN9	2.38784	0.00132295	0.253368
SalineSIV	ZNF704	1.97995	0.00145617	0.210772
SalineSIV	GRASP	0.763656	0.00146834	0.615703
SalineSIV	TNIK	2.04331	0.00155518	0.205144
SalineSIV	LOC114676795	1.70024	0.00157748	0.210178
SalineSIV	JPT1	0.693054	0.00158002	0.676617
SalineSIV	CD74	0.693969	0.00171929	3.63632
SalineSIV	CEP128	0.584262	0.0018186	0.822194
SalineSIV	SLC25A37	0.65914	0.00214611	0.911881
SalineSIV	ARHGEF10L	1.14744	0.00232798	0.494939
SalineSIV	PLEKHM2	0.716202	0.00232798	0.467358
SalineSIV	MSR1	0.549811	0.00232798	2.03039
SalineSIV	ITGB2	0.528784	0.00241984	0.870126
SalineSIV	PIK3CD	0.541769	0.00245634	0.589994
SalineSIV	APOE	0.695534	0.00246043	5.67246
SalineSIV	NAIP	0.919634	0.0025063	0.558869
SalineSIV	PLA2G4A	0.610901	0.00255914	1.87097
SalineSIV	SLC43A2	0.800577	0.00255914	1.43592
SalineSIV	ST6GAL1	0.520108	0.00268706	1.01255
SalineSIV	MAMU-DRA	0.642889	0.00271387	1.43411
SalineSIV	SLC7A8	0.69534	0.00271387	1.17134
SalineSIV	KLC1	0.627014	0.00284157	0.502992
SalineSIV	DPP7	0.576133	0.00297377	0.488588
SalineSIV	FMNL1	0.556704	0.00297377	0.607818
SalineSIV	RGL2	0.633309	0.00302011	0.394016
SalineSIV	SLC25A29	1.00122	0.00315384	0.354673
SalineSIV	CD37	0.571315	0.00330439	0.590787
SalineSIV	ATP1A1	0.531472	0.0034167	0.610815
SalineSIV	DOP1B	0.57116	0.00341866	0.449568
SalineSIV	NCF1	1.33867	0.00345519	0.374309
SalineSIV	LOC708096	1.00879	0.00385483	0.180024
SalineSIV	LILRB1	0.588788	0.00404336	0.920055
SalineSIV	ANGPTL6	1.12924	0.00412029	0.232411
SalineSIV	SDHA	0.913628	0.00412743	0.331205
SalineSIV	PKN1	0.607122	0.00413504	0.512259
SalineSIV	MLXIPL	0.97201	0.00427847	0.520606
SalineSIV	LOXL3	0.763798	0.0044972	0.528092
SalineSIV	SPI1	0.640833	0.00495293	0.597949
SalineSIV	EGR1	1.63221	0.00497638	0.206558
SalineSIV	UPF2	0.715381	0.00501118	0.655051
SalineSIV	HIST1H1D	0.641757	0.00502163	0.28611
SalineSIV	ODF3B	0.70354	0.00526939	0.340105
SalineSIV	ETAA1	0.719342	0.00555062	0.301777
SalineSIV	CSNK1E	0.940847	0.00561312	0.405472
SalineSIV	RACK1	0.513632	0.00562918	0.683958
SalineSIV	ATP13A3	0.715334	0.00640758	1.14964
SalineSIV	CCDC151	1.93318	0.00640758	0.150877
SalineSIV	MAMU-DPB	1.04976	0.00641814	0.249785
SalineSIV	TTF1	1.03579	0.00697707	0.348647
SalineSIV	MYOF	2.01808	0.00754554	0.212072
SalineSIV	LOC107000401	0.622023	0.00772449	0.355698
SalineSIV	STAT3	0.602714	0.00772449	0.563309
SalineSIV	BICRA	1.20633	0.00772449	0.280722
SalineSIV	LOC114672266	3.28952	0.00785002	0.109593
SalineSIV	GUSBA	0.67227	0.00794301	0.447881
SalineSIV	PBX2	1.12919	0.0084355	0.237386
SalineSIV	RAB20	0.549759	0.00853179	0.640337
SalineSIV	GATD3A	1.54596	0.00874376	0.175059
SalineSIV	LMF2	1.82901	0.00900065	0.131926
SalineSIV	LOC100429133	0.923942	0.00913171	0.421986
SalineSIV	SRSF10	0.572264	0.00916164	0.618361
SalineSIV	TYK2	0.703078	0.00961392	0.234274
SalineSIV	TWF1	1.38314	0.0101849	0.272783
SalineSIV	RND3	1.51172	0.0101849	0.166344
SalineSIV	DLG4	1.28505	0.0104153	0.158023
SalineSIV	CEP112	1.03028	0.0108329	0.459768
SalineSIV	LOC714576	0.759504	0.0111556	0.319535
SalineSIV	LOC114669903	0.519023	0.0111694	0.486065
SalineSIV	LOC716530	0.619834	0.0111694	0.231544
SalineSIV	NFE2L1	0.716933	0.0111694	0.251634
SalineSIV	PWP1	1.03853	0.0114912	0.254147
SalineSIV	IFI27	1.19478	0.0116659	0.229342
SalineSIV	USP4	0.621003	0.0119804	0.34828
SalineSIV	LOC106998557	1.2634	0.0129337	0.219636
SalineSIV	HIST1H2AD	1.39312	0.0130406	0.113654
SalineSIV	RCC2	0.566119	0.0138006	0.272255
SalineSIV	TEP1	0.525204	0.0139607	0.465075
SalineSIV	AARS	1.18587	0.0141892	0.449389
SalineSIV	HMGN2	0.662675	0.0143366	0.256466
SalineSIV	CLK4	0.651678	0.0145824	0.333755
SalineSIV	COQ4	1.33438	0.0145824	0.230518
SalineSIV	ADAMTSL2	1.75979	0.015253	0.185495
SalineSIV	FER1L5	3.78792	0.0153187	0.0894494
SalineSIV	MTHFR	0.670885	0.0154748	0.297132
SalineSIV	LGALS12	2.39506	0.0164348	0.164079
SalineSIV	LOC107000823	1.30868	0.0165663	0.250453
SalineSIV	EID2	1.15828	0.0166313	0.152904
SalineSIV	RPL29	0.823491	0.0168203	0.327838
SalineSIV	LOC100431023	0.843206	0.0174491	0.253492
SalineSIV	RNF122	0.774956	0.0190806	0.353643
SalineSIV	USF2	0.510742	0.0193299	0.302902
SalineSIV	LOC106999151	0.621442	0.0196953	0.407882
SalineSIV	SNRNP70	0.532186	0.0196953	0.531231
SalineSIV	FES	0.992236	0.0200812	0.239085
SalineSIV	PML	0.692896	0.020434	0.418964
SalineSIV	CDIPT	1.22688	0.020619	0.126045
SalineSIV	CCDC59	1.08051	0.0208021	0.243977
SalineSIV	RPS19BP1	0.685911	0.0217465	0.369523
SalineSIV	ADIPOR1	0.765695	0.022001	0.346632
SalineSIV	YAF2	0.514981	0.0220778	0.569575
SalineSIV	GPAT4	0.81226	0.0227879	0.229786
SalineSIV	PLEK	0.611437	0.0227879	1.19923
SalineSIV	CCL4L1	0.551102	0.0227879	7.41556
SalineSIV	CLEC1A	4.26377	0.0227981	0.0932899
SalineSIV	LOC114672064	0.549544	0.0231028	0.511372
SalineSIV	PSMB8	1.34771	0.0240247	0.235653
SalineSIV	PNPLA7	0.801133	0.0240247	0.329598
SalineSIV	SH3GL1	0.610769	0.0240247	0.397776
SalineSIV	ANXA11	0.946418	0.0246925	0.237464
SalineSIV	TMTC4	0.830209	0.0246925	0.28698
SalineSIV	UFL1	0.903278	0.0256329	0.366358
SalineSIV	HVCN1	0.558066	0.0264917	0.35485
SalineSIV	NUCKS1	0.5812	0.0267325	0.590071
SalineSIV	HLX	2.45133	0.0267514	0.151777
SalineSIV	MAMU-DMB	1.16518	0.0268401	0.262043
SalineSIV	YPEL3	0.571685	0.0277213	0.288466
SalineSIV	LOC114679374	2.3067	0.02773	0.183844
SalineSIV	FLOT1	0.663994	0.0281389	0.567566
SalineSIV	MAP2K2	1.06115	0.0281389	0.249328
SalineSIV	SLC45A4	0.951819	0.0288521	0.323776
SalineSIV	ILF3	0.557908	0.0289243	0.348243
SalineSIV	CITED4	2.37222	0.0289418	0.109456
SalineSIV	NMT2	0.980858	0.0290908	0.27447
SalineSIV	CTTN	1.46354	0.0290908	0.150155
SalineSIV	CBX4	1.35174	0.0290908	0.195044
SalineSIV	BTN3A3	1.83313	0.0307237	0.156083
SalineSIV	MOB3B	1.49722	0.0307237	0.200281
SalineSIV	C2	0.904175	0.0311485	0.271809
SalineSIV	SLC15A3	1.0569	0.0312166	0.29024
SalineSIV	BSDC1	0.805431	0.0318575	0.216426
SalineSIV	ACOX1	1.0632	0.0319283	0.316591
SalineSIV	OTULIN	0.735786	0.0319945	0.337937
SalineSIV	COPA	0.563074	0.0339315	0.480055
SalineSIV	CNTNAP4	4.0968	0.0339315	0.133321
SalineSIV	CLSTN3	0.626236	0.0341186	0.194244
SalineSIV	TNFSF8	0.611271	0.0343124	0.485046
SalineSIV	YIF1B	0.95825	0.0348682	0.135728
SalineSIV	PTCD3	0.85677	0.0349786	0.17555
SalineSIV	NOTCH1	0.878621	0.0353512	0.262408
SalineSIV	LOC114677681	1.81189	0.0353967	0.128464
SalineSIV	AGPAT5	0.950978	0.0360972	0.481579
SalineSIV	PRPF8	0.6348	0.0361181	0.415513
SalineSIV	QSOX1	0.553524	0.0365962	0.265057
SalineSIV	GPAA1	0.720042	0.036641	0.260819
SalineSIV	LOC698152	0.605908	0.036641	0.544636
SalineSIV	HEG1	0.754542	0.0378611	0.288108
SalineSIV	LOC677692	5.43342	0.0378611	0.0844275
SalineSIV	TMEM156	0.686135	0.0381266	0.568502
SalineSIV	SPDL1	3.08221	0.0385423	0.109829
SalineSIV	UBE2L3	0.591418	0.0394641	0.236039
SalineSIV	TBL1X	0.706441	0.0410967	0.372378
SalineSIV	LOC694064	0.506252	0.0418866	1.35462
SalineSIV	RBM23	0.66248	0.0418866	0.290379
SalineSIV	CDK10	0.994896	0.0424593	0.112316
SalineSIV	CLCN2	1.3591	0.0431706	0.071524
SalineSIV	SMOX	2.69703	0.0442726	0.143874
SalineSIV	ERCC3	0.803063	0.0464983	0.291809
SalineSIV	MIDN	0.692891	0.0468938	0.336956
SalineSIV	LAGE3	0.954511	0.0473953	0.16051
SalineSIV	EIF3B	1.18272	0.0490668	0.234559
SalineSIV	ZBTB48	1.08398	0.0493794	0.1448
SalineSIV	TNFSF12	0.859205	0.0493794	0.292606
SalineSIV	TNF	0.567329	0.049687	0.545846
SalineSIV	TMEM234	1.17456	0.0498633	0.143475
SalineSIV	TUBGCP5	1.34901	0.0498633	0.193313
SalineSIV	CMPK2	0.660097	0.0498633	0.566824

## Sheet: CD16+CAM
group_name	name	Log2FC	FDR	MeanDiff
Morphine	ERC1	0.91072	1.04026e-05	2.46015
Morphine	LOC109910387	0.528288	6.62804e-05	422.414
Morphine	ZBTB16	2.27515	8.09321e-05	0.746455
Morphine	LRMP	1.02367	0.000124431	1.62046
Morphine	HRH1	1.04808	0.000575685	1.01938
Morphine	CENPJ	1.4288	0.000845122	0.239705
Morphine	SIRT1	1.04606	0.000999368	0.48259
Morphine	SH3TC1	1.80776	0.0012525	0.307037
Morphine	SLC24A4	1.10697	0.00181944	1.2279
Morphine	SLC25A12	1.36965	0.00205151	0.340633
Morphine	SNRNP48	2.10965	0.00273353	0.24088
Morphine	AMBRA1	0.660623	0.00311538	0.639605
Morphine	QRICH1	1.07243	0.00318906	0.655744
Morphine	DCAF6	0.788106	0.00380102	0.651562
Morphine	ARHGAP12	0.937077	0.004106	0.725178
Morphine	ZNF280D	0.929394	0.00424254	0.326034
Morphine	FKBP5	0.759787	0.00537569	2.25739
Morphine	CDC27	0.647397	0.00537569	0.661844
Morphine	TAF5L	1.56786	0.0056066	0.303714
Morphine	LOC114677632	4.81773	0.0060276	0.259718
Morphine	EPB41L2	0.612156	0.00628923	1.40541
Morphine	IFI44L	2.04301	0.00710623	0.226481
Morphine	ABHD12	0.671723	0.00791154	0.41284
Morphine	KDM3B	0.505519	0.00852619	0.43923
Morphine	UBASH3B	0.88444	0.00852619	0.796228
Morphine	CEP112	1.26994	0.00853468	0.385574
Morphine	HMBOX1	0.672717	0.00853651	0.595939
Morphine	SLC9A8	0.681146	0.00862486	0.321728
Morphine	DDX50	0.679894	0.00899507	0.334817
Morphine	SH3GL1	0.939619	0.00964013	0.244116
Morphine	PPP2R2B	1.47197	0.00972775	0.413542
Morphine	TMOD3	0.606258	0.0105149	1.0904
Morphine	GMPS	0.781189	0.0107719	0.296281
Morphine	TPM1	2.15735	0.0109557	0.135274
Morphine	ELP4	0.970236	0.0111987	0.787487
Morphine	HSPBAP1	0.714281	0.0130158	0.288438
Morphine	PTBP2	0.792853	0.0139356	0.648795
Morphine	LOC106993772	0.88343	0.0139356	0.179233
Morphine	RMND1	0.746664	0.0141339	0.266861
Morphine	TWF1	1.10554	0.0143416	0.233267
Morphine	LARP4	1.02965	0.0143416	0.683616
Morphine	NFATC3	0.62395	0.0143416	0.896901
Morphine	HEG1	0.765328	0.0150068	0.524422
Morphine	MACO1	0.852578	0.0150603	0.568801
Morphine	SMIM35	3.18111	0.0155728	0.134822
Morphine	KLHDC10	0.805791	0.015877	0.321476
Morphine	ALMS1	0.999302	0.015877	0.481688
Morphine	AGK	0.586723	0.0171305	0.359415
Morphine	CRYZL1	1.35513	0.0198809	0.380301
Morphine	CXHXorf38	0.969165	0.0204138	0.34072
Morphine	TRANK1	0.611209	0.0216007	0.554917
Morphine	STAM	0.95167	0.0216007	0.293419
Morphine	CLEC16A	0.885357	0.0218351	0.526099
Morphine	FAM114A1	3.09058	0.0219842	0.110429
Morphine	TRPC3	0.935557	0.0242846	0.157456
Morphine	PPP6R2	0.66903	0.0242846	0.429116
Morphine	TSPAN7	2.82045	0.0242846	0.166852
Morphine	KATNA1	0.663618	0.0256741	0.207846
Morphine	MYO5A	0.659601	0.0259126	0.573684
Morphine	RALGPS2	0.8205	0.0262483	0.332916
Morphine	LOC114676845	1.14158	0.0273659	0.813041
Morphine	FBXO42	0.56041	0.0275317	0.323805
Morphine	LOC106999151	0.513974	0.0285274	0.252567
Morphine	VWF	0.623948	0.0298898	0.245834
Morphine	DTNBP1	0.505438	0.0306644	0.534335
Morphine	RNF4	0.810994	0.0314988	0.398715
Morphine	LOC717123	1.87415	0.031606	0.142497
Morphine	PRPF39	0.745511	0.0317497	0.199339
Morphine	SMYD3	0.601751	0.0345088	1.16555
Morphine	LOC106996136	1.50294	0.036248	0.274718
Morphine	GTPBP1	0.641742	0.0393303	0.138928
Morphine	ME2	0.620627	0.0428101	0.814833
Morphine	MEMO1	0.527171	0.0457005	0.897086
Morphine	FAM13B	0.501766	0.0465631	0.714246
Morphine	TCP11L1	1.85825	0.0465631	0.113038
Morphine	RGS17	2.78458	0.0472673	0.172584
Morphine	RPS6KA5	0.651492	0.0474911	0.837744
Morphine	ALG9	1.74596	0.0474911	0.216529
Morphine	ELP1	1.44613	0.0476644	0.157339
MorphineSIV	DOCK4	0.839557	9.01619e-21	12.0962
MorphineSIV	FKBP5	1.42628	1.53358e-18	4.70762
MorphineSIV	SIK3	0.788956	3.92142e-12	7.76292
MorphineSIV	ZBTB16	2.25178	7.31537e-10	0.767108
MorphineSIV	LOC708686	0.738433	7.53937e-10	3.50314
MorphineSIV	RNF13	0.674399	5.96304e-09	3.57975
MorphineSIV	MTSS1	0.615756	5.96304e-09	5.38973
MorphineSIV	RASGEF1B	0.744737	6.1654e-09	4.21422
MorphineSIV	GNA13	0.6334	7.24077e-09	3.27067
MorphineSIV	FLVCR2	1.30871	5.63916e-08	1.98435
MorphineSIV	SRGAP2	0.597866	1.64938e-07	6.3421
MorphineSIV	AFF1	0.946753	4.07914e-07	1.60769
MorphineSIV	CPED1	1.16205	4.38218e-07	1.19956
MorphineSIV	AKT3	0.682035	8.16436e-07	3.07774
MorphineSIV	SSH2	0.562783	9.98882e-07	4.43587
MorphineSIV	CPEB3	0.699931	1.58738e-06	1.20052
MorphineSIV	MAML3	0.61914	1.76824e-06	4.47351
MorphineSIV	RERE	0.50166	2.33545e-06	2.55309
MorphineSIV	XYLT1	0.59045	2.39079e-06	4.78516
MorphineSIV	LOC114673210	1.76259	2.7199e-06	0.392739
MorphineSIV	RIPK2	0.745682	3.21705e-06	1.83462
MorphineSIV	LOC114680207	0.677757	3.50002e-06	0.77154
MorphineSIV	ABCG1	3.62043	3.62394e-06	0.354564
MorphineSIV	TMEM140	1.12405	4.23537e-06	0.948331
MorphineSIV	TSC22D2	0.861338	6.62042e-06	1.4796
MorphineSIV	RADX	1.16901	6.62042e-06	0.550008
MorphineSIV	EPB41L2	0.85776	7.33794e-06	2.31017
MorphineSIV	KDM6A	0.662243	7.93074e-06	1.58087
MorphineSIV	ARHGAP12	0.895689	1.33619e-05	0.778359
MorphineSIV	GALNT3	1.35451	1.38426e-05	1.23597
MorphineSIV	CPLANE1	0.693542	1.55116e-05	0.748685
MorphineSIV	PELI1	0.728444	1.55116e-05	5.96632
MorphineSIV	BCL2L11	0.656382	1.60391e-05	0.875066
MorphineSIV	USP12	0.777945	2.05631e-05	0.946782
MorphineSIV	PIP4K2A	0.554236	2.71956e-05	3.41292
MorphineSIV	ELF1	0.50944	2.71956e-05	1.74872
MorphineSIV	LARP4	0.734623	3.22107e-05	0.460187
MorphineSIV	SNX9	0.81211	3.36729e-05	0.78421
MorphineSIV	PITPNC1	0.647912	4.20496e-05	1.76279
MorphineSIV	PDE8A	0.572421	4.42061e-05	0.746363
MorphineSIV	AMBRA1	0.822361	4.61985e-05	0.751556
MorphineSIV	ABCA1	1.23862	4.66191e-05	0.805926
MorphineSIV	ANKRD33B	1.05411	6.40838e-05	1.0879
MorphineSIV	KIAA1147	1.58872	6.44723e-05	0.239614
MorphineSIV	ETNK1	0.691041	7.41368e-05	1.55123
MorphineSIV	LOC106994692	5.12126	0.000100286	0.17088
MorphineSIV	SAMD8	0.758023	0.000115207	0.506604
MorphineSIV	TGFBR1	0.695529	0.000117252	0.85245
MorphineSIV	AGO2	0.60678	0.000143637	0.956295
MorphineSIV	MCUB	0.571649	0.000146128	0.665183
MorphineSIV	LRBA	0.7174	0.000146128	1.36265
MorphineSIV	TNKS	0.72209	0.000146128	1.33548
MorphineSIV	IL1RAP	0.644057	0.000152881	0.568334
MorphineSIV	ANKRD10	0.571358	0.000168781	0.983424
MorphineSIV	PIP5K1A	0.863146	0.000172502	0.300852
MorphineSIV	GPR155	0.783919	0.000180482	0.303157
MorphineSIV	AFF4	0.507034	0.00019086	1.05245
MorphineSIV	CPNE4	3.66	0.000192785	0.179209
MorphineSIV	CD55	0.834678	0.000198098	3.08717
MorphineSIV	ARIH1	0.54649	0.000208853	1.48204
MorphineSIV	LOC705327	3.21057	0.000227529	0.203994
MorphineSIV	ELL2	0.514307	0.000236174	0.942737
MorphineSIV	FAM227A	4.10801	0.000236592	0.109467
MorphineSIV	CPD	0.721654	0.000245831	1.2013
MorphineSIV	SLC30A9	0.593623	0.000257062	0.627231
MorphineSIV	GPBP1	0.578633	0.000260424	0.954675
MorphineSIV	VWF	1.41386	0.000263101	0.611396
MorphineSIV	NAGA	1.24739	0.000263172	0.227139
MorphineSIV	PDZD8	0.656245	0.000273993	0.77903
MorphineSIV	KPNA4	0.553169	0.000285618	1.05844
MorphineSIV	SRPK2	0.802623	0.00029086	0.329029
MorphineSIV	DRAM1	0.811493	0.00029086	0.489864
MorphineSIV	MYLIP	0.56359	0.000376429	0.512692
MorphineSIV	SASH1	0.60012	0.000392849	1.3261
MorphineSIV	NR1D2	0.641125	0.000399466	0.504567
MorphineSIV	SIRT1	0.988795	0.000409661	0.532794
MorphineSIV	ARID5B	0.755151	0.000423439	1.80835
MorphineSIV	COMMD1	0.732056	0.000460292	0.667278
MorphineSIV	ELF2	0.562292	0.000461104	1.20596
MorphineSIV	CRCP	0.923735	0.000473112	0.382452
MorphineSIV	MSR1	0.670247	0.000496241	0.958704
MorphineSIV	TIMP2	0.658643	0.000507211	0.211586
MorphineSIV	BMT2	0.603355	0.00052783	0.764942
MorphineSIV	RNASEH2B	0.553724	0.000558427	0.708283
MorphineSIV	SAP25	1.66366	0.000609878	0.110688
MorphineSIV	POLD3	0.835983	0.000610842	0.876702
MorphineSIV	LOC714964	0.912248	0.000622315	0.425744
MorphineSIV	P2RX4	0.670669	0.000665331	0.617882
MorphineSIV	ABHD17B	0.70789	0.000672689	1.09586
MorphineSIV	CTTNBP2NL	0.9126	0.000785387	0.291083
MorphineSIV	TFDP2	0.716067	0.000785387	0.684333
MorphineSIV	RNF185	0.862963	0.000838372	0.266929
MorphineSIV	DERL1	0.550607	0.000857179	0.436991
MorphineSIV	EFL1	0.723331	0.000861575	1.10514
MorphineSIV	ZNRF1	0.715706	0.000861575	0.301223
MorphineSIV	FAM3B	2.17856	0.000913423	0.134783
MorphineSIV	RNF144B	0.6199	0.00116272	1.35277
MorphineSIV	ANXA11	0.505962	0.00117188	0.588324
MorphineSIV	PCNX1	0.509446	0.0012174	0.482344
MorphineSIV	MACO1	0.693294	0.0012512	0.460275
MorphineSIV	PTEN	0.567437	0.00125258	1.8385
MorphineSIV	NR4A3	0.973016	0.00126083	0.509108
MorphineSIV	TGFBR2	0.557982	0.00136018	1.61203
MorphineSIV	STK17A	0.695748	0.00137573	0.764099
MorphineSIV	FDX1	0.787908	0.00140294	0.670904
MorphineSIV	CDYL	0.523946	0.00145421	0.898882
MorphineSIV	PLEKHM3	0.618885	0.00145421	0.514345
MorphineSIV	PPM1A	0.635737	0.00145676	0.608555
MorphineSIV	LUZP1	0.75818	0.00166777	0.241398
MorphineSIV	RUNX2	0.663012	0.00172289	0.656374
MorphineSIV	CASP3	0.523525	0.00177407	0.293818
MorphineSIV	CREM	0.705812	0.0019341	0.457212
MorphineSIV	NFKB1	0.702565	0.00195964	3.40855
MorphineSIV	MINK1	0.578902	0.00215925	0.412923
MorphineSIV	FAM102B	1.08592	0.00216795	0.585912
MorphineSIV	MFSD14A	0.61586	0.00232859	0.53848
MorphineSIV	SOCS6	0.980254	0.00246981	0.928967
MorphineSIV	RAB20	0.790935	0.0025275	0.521386
MorphineSIV	EGR3	1.34193	0.00286056	0.163963
MorphineSIV	GATAD2B	0.500933	0.00291477	0.764807
MorphineSIV	PIAS2	1.38146	0.00291477	0.159096
MorphineSIV	LOC106999151	0.545401	0.00303648	0.239354
MorphineSIV	MAPKAPK2	0.544644	0.00340717	0.577936
MorphineSIV	CTTNBP2	0.818422	0.00340717	0.570858
MorphineSIV	SIGLEC12	1.53239	0.00345558	0.209835
MorphineSIV	RNF150	0.864652	0.00353261	0.789592
MorphineSIV	SUSD6	0.542306	0.00382497	1.07585
MorphineSIV	ZFP30	1.52009	0.00382497	0.161413
MorphineSIV	SLC8B1	0.586371	0.00393356	0.264586
MorphineSIV	EREG	1.16845	0.00412381	2.74544
MorphineSIV	BCL2	0.582719	0.00430464	2.1685
MorphineSIV	FAM117B	0.571447	0.0044051	0.873903
MorphineSIV	EIF4E3	0.895254	0.00455031	1.29215
MorphineSIV	CD80	0.944882	0.00455031	0.449181
MorphineSIV	TAPT1	0.668117	0.00455031	0.261165
MorphineSIV	PLEKHM1	0.504125	0.00455031	0.196598
MorphineSIV	SIPA1L3	0.512311	0.00455031	0.479479
MorphineSIV	NAF1	0.968286	0.00478389	0.364926
MorphineSIV	FMNL2	0.978114	0.00495815	1.747
MorphineSIV	TSPAN4	1.09039	0.00514801	0.152494
MorphineSIV	RNF138	0.719972	0.00519981	0.473709
MorphineSIV	ESYT2	0.655632	0.00525192	0.90794
MorphineSIV	LOC106999295	1.3409	0.00543258	0.0974205
MorphineSIV	NLK	0.712739	0.0055341	0.624492
MorphineSIV	LEMD3	0.635255	0.005563	0.391664
MorphineSIV	ZNF704	4.20295	0.00570619	0.151268
MorphineSIV	SPATS2L	0.500581	0.00582191	0.267296
MorphineSIV	LILRA4	3.1655	0.00584456	0.0750121
MorphineSIV	KLHL24	0.577421	0.005865	1.10096
MorphineSIV	USP22	0.762839	0.005865	0.272431
MorphineSIV	CRY2	0.98668	0.00587293	0.291283
MorphineSIV	NAB1	1.14007	0.00614557	0.262959
MorphineSIV	CYSTM1	0.768541	0.00634469	0.403125
MorphineSIV	SFXN5	1.26187	0.00634469	0.249867
MorphineSIV	SIK2	0.647608	0.00634469	0.622738
MorphineSIV	MIGA2	0.944135	0.00634469	0.102424
MorphineSIV	LOC114679374	2.66395	0.00653325	0.120213
MorphineSIV	GNAI3	0.551696	0.00655505	0.355351
MorphineSIV	C1QTNF3	1.59438	0.0068747	0.106002
MorphineSIV	AKIRIN2	0.680482	0.00687828	0.426291
MorphineSIV	ATP11B	0.552288	0.00705496	0.820758
MorphineSIV	UBE2E1	0.579786	0.0070802	0.472737
MorphineSIV	ZNF26	1.08217	0.0070802	0.173327
MorphineSIV	PPM1B	0.533691	0.00710714	0.704349
MorphineSIV	MOSMO	0.541774	0.00806587	0.328051
MorphineSIV	SPTLC1	0.628678	0.00825139	0.249678
MorphineSIV	SUCO	0.51416	0.00836648	0.478814
MorphineSIV	RNF217	0.713725	0.00838409	0.260123
MorphineSIV	FAM214A	0.641501	0.00840972	0.496588
MorphineSIV	LOC114673202	0.814554	0.00841405	0.121489
MorphineSIV	LOC114676795	0.917918	0.00867034	0.303636
MorphineSIV	SLC38A1	0.661422	0.00869757	1.04481
MorphineSIV	FLOT1	0.947607	0.00879978	0.174944
MorphineSIV	MAPRE2	0.502564	0.00879978	1.70382
MorphineSIV	INPP5F	0.561463	0.00893562	0.668627
MorphineSIV	NT5DC3	1.16396	0.00906579	0.157579
MorphineSIV	ZNF805	1.76416	0.00906579	0.116675
MorphineSIV	MDN1	0.748782	0.00916952	0.254649
MorphineSIV	DNAJC7	0.514373	0.00922611	0.182386
MorphineSIV	RNF19A	0.592723	0.00984416	0.601559
MorphineSIV	GPHN	0.684735	0.0100992	0.635323
MorphineSIV	ITSN1	0.641862	0.0103777	0.473801
MorphineSIV	UBAP2L	0.619575	0.0104041	0.259314
MorphineSIV	SREK1	0.669633	0.0104071	1.18923
MorphineSIV	DUSP10	0.538514	0.0104755	0.211239
MorphineSIV	EIF4E	0.625024	0.0105554	0.101274
MorphineSIV	ITGAV	0.520963	0.0105653	0.861669
MorphineSIV	MAN1A2	0.621565	0.0105882	0.862828
MorphineSIV	NR4A2	0.745356	0.0105882	0.412032
MorphineSIV	BBX	0.540463	0.0121263	1.04202
MorphineSIV	RNF122	1.18424	0.0121691	0.224805
MorphineSIV	GOLIM4	0.646398	0.0122299	0.26169
MorphineSIV	FEZ2	0.583039	0.0122299	0.294931
MorphineSIV	DBF4	0.895207	0.012703	0.360101
MorphineSIV	SUMO1	0.915148	0.0127868	0.189482
MorphineSIV	DCUN1D2	0.924739	0.012961	0.178985
MorphineSIV	LIPN	0.778101	0.0130622	0.277419
MorphineSIV	LOC114674199	0.660215	0.0130754	0.307131
MorphineSIV	TP53I13	1.94739	0.0134149	0.114638
MorphineSIV	SELENOI	0.896124	0.013922	0.276306
MorphineSIV	LOC100429607	0.752029	0.013922	0.102665
MorphineSIV	RANBP10	1.17321	0.013922	0.187923
MorphineSIV	LOC114678834	0.960711	0.0139464	0.232391
MorphineSIV	PEX14	0.753326	0.013991	0.262319
MorphineSIV	TRRAP	0.570777	0.0140189	0.265206
MorphineSIV	SS18	0.566372	0.0142501	0.519845
MorphineSIV	RPAP2	0.532417	0.0143048	0.306625
MorphineSIV	ELL	0.582883	0.0143288	0.278292
MorphineSIV	STIM2	0.571503	0.0146061	0.818638
MorphineSIV	FAM3C	0.674905	0.0147901	0.275546
MorphineSIV	LOC106994879	2.01831	0.0149267	0.075207
MorphineSIV	DTD1	0.601892	0.0153832	0.289552
MorphineSIV	STIMATE	0.887597	0.016626	0.422617
MorphineSIV	CCDC180	3.47203	0.016626	0.0513581
MorphineSIV	KLHL25	1.26661	0.0168158	0.137462
MorphineSIV	ARHGEF7	0.551707	0.0170218	0.539883
MorphineSIV	ETS2	0.529313	0.0173569	0.533553
MorphineSIV	TRIM24	0.51598	0.0173569	0.332962
MorphineSIV	CYTIP	0.691852	0.0176308	1.20242
MorphineSIV	EEPD1	1.52395	0.0178482	0.341858
MorphineSIV	PPP4R1	0.697852	0.0185729	0.365345
MorphineSIV	TFRC	0.602585	0.0186205	0.259871
MorphineSIV	SLC25A26	0.523809	0.0186955	0.522642
MorphineSIV	PLBD2	0.816772	0.0187557	0.150257
MorphineSIV	BRINP2	1.66791	0.0188294	0.213791
MorphineSIV	INTS3	1.0789	0.0188817	0.165454
MorphineSIV	SLC39A9	0.683826	0.0191996	0.211735
MorphineSIV	CGAS	0.780586	0.0193912	0.10776
MorphineSIV	RILPL2	0.69651	0.0195367	0.65032
MorphineSIV	PIGA	0.907217	0.0195367	0.309511
MorphineSIV	MAP2K1	0.502206	0.0196572	0.442781
MorphineSIV	SMIM20	1.54971	0.0199445	0.0602741
MorphineSIV	ZNF614	0.693943	0.0201666	0.175338
MorphineSIV	WDR12	1.01944	0.02027	0.0634564
MorphineSIV	GUSBA	0.544824	0.0206361	0.421964
MorphineSIV	SLC25A36	0.589328	0.0209669	0.209739
MorphineSIV	AEBP2	0.562608	0.0212704	0.361553
MorphineSIV	CDYL2	0.617587	0.0212704	1.5472
MorphineSIV	PSMD14	0.537478	0.0213878	0.332713
MorphineSIV	HEG1	0.671015	0.02141	0.44078
MorphineSIV	TAF5L	0.86935	0.0215452	0.21773
MorphineSIV	ASXL1	0.881304	0.0220299	0.290126
MorphineSIV	RAD51B	0.569133	0.0223486	0.907155
MorphineSIV	AMDHD1	0.762624	0.0223486	0.210843
MorphineSIV	TENT4B	0.517192	0.0228507	0.273671
MorphineSIV	ITGAD	1.00955	0.0230051	0.109977
MorphineSIV	LPAR5	0.619608	0.0232234	0.0804864
MorphineSIV	ARIH2	0.618025	0.0233384	0.453841
MorphineSIV	MNT	0.721356	0.0237636	0.131495
MorphineSIV	DDX47	0.81923	0.0239827	0.114744
MorphineSIV	GTPBP1	0.586978	0.024245	0.151089
MorphineSIV	JOSD1	0.653286	0.0244463	0.372657
MorphineSIV	UBR4	0.524592	0.0244622	0.441904
MorphineSIV	SS18L1	0.91747	0.0253719	0.194471
MorphineSIV	UGGT2	2.81511	0.0253719	0.0462873
MorphineSIV	CLEC12A	1.48869	0.0253956	0.190001
MorphineSIV	LOC114669793	2.30427	0.0253988	0.125025
MorphineSIV	PDPR	0.516107	0.0259849	0.134211
MorphineSIV	PRUNE1	1.51278	0.0261087	0.122778
MorphineSIV	BORCS5	0.898575	0.0267563	0.327258
MorphineSIV	CLCC1	1.0256	0.0268137	0.135916
MorphineSIV	JMY	0.60692	0.0273719	0.691648
MorphineSIV	TAF4	0.781768	0.0281839	0.131603
MorphineSIV	TTC3	0.733491	0.0284396	0.382922
MorphineSIV	KAT6B	0.670553	0.0284396	0.680137
MorphineSIV	SYT17	1.54442	0.0294688	0.0560791
MorphineSIV	FANCC	0.736924	0.0297761	0.415814
MorphineSIV	INTS4	0.742667	0.0301731	0.229974
MorphineSIV	CMKLR1	0.558808	0.0306228	0.119695
MorphineSIV	GAB1	0.559417	0.0310422	1.25328
MorphineSIV	STAM	0.541708	0.0310422	0.147414
MorphineSIV	GALNS	0.579733	0.0310422	0.23878
MorphineSIV	NLN	0.999796	0.0311084	0.289252
MorphineSIV	PDGFB	0.899783	0.0312108	0.198624
MorphineSIV	CDADC1	1.25929	0.0312108	0.155353
MorphineSIV	PIGU	0.591404	0.0312208	0.210386
MorphineSIV	LOC106998034	0.650625	0.0313225	0.139233
MorphineSIV	PDE3B	0.519774	0.0313225	1.34696
MorphineSIV	METTL25	0.624692	0.031434	0.175698
MorphineSIV	NOM1	0.771401	0.0317643	0.149131
MorphineSIV	RPRD1A	0.521048	0.0317643	0.343594
MorphineSIV	ALS2	0.988947	0.0319073	0.122007
MorphineSIV	IMMP2L	0.744818	0.0320442	1.88443
MorphineSIV	DNAJC1	0.513078	0.0325117	0.76416
MorphineSIV	TMED3	0.693075	0.033354	0.0638087
MorphineSIV	ICA1L	0.994811	0.0333727	0.0642151
MorphineSIV	CDH4	1.81066	0.0335762	0.0916436
MorphineSIV	LMBR1L	0.986584	0.0340586	0.070058
MorphineSIV	SUCLG2	0.511126	0.0342034	0.56213
MorphineSIV	SLC44A1	0.566159	0.0342034	0.098374
MorphineSIV	LHFPL1	1.02844	0.0342034	0.0759053
MorphineSIV	LOC107000049	1.56773	0.0342874	0.0732698
MorphineSIV	EHHADH	1.92191	0.0343247	0.118163
MorphineSIV	BRMS1L	1.02819	0.0348277	0.230398
MorphineSIV	FAM149A	1.0885	0.0357592	0.937392
MorphineSIV	SMURF1	0.644446	0.0358873	0.61958
MorphineSIV	PGM3	0.76203	0.0375497	0.135743
MorphineSIV	ZBTB1	0.661244	0.0378523	0.287993
MorphineSIV	ETV5	0.909794	0.0378699	0.523432
MorphineSIV	TRPC3	1.31333	0.0378699	0.20629
MorphineSIV	SLC25A25	0.743137	0.0378699	0.250386
MorphineSIV	PLEKHA3	0.934539	0.0380602	0.105802
MorphineSIV	SAMD4B	0.524698	0.0384208	0.233664
MorphineSIV	LILRA3	0.671718	0.0384834	0.165131
MorphineSIV	MAF	0.627697	0.0392067	0.689488
MorphineSIV	AXL	1.40988	0.0393507	0.334181
MorphineSIV	UST	0.897401	0.0400256	0.236832
MorphineSIV	GPR39	1.99298	0.0403315	0.0417373
MorphineSIV	KCNG2	2.47388	0.0404172	0.0447023
MorphineSIV	TTF2	1.5508	0.0405396	0.135565
MorphineSIV	LOC106997715	3.53488	0.0405396	0.0346096
MorphineSIV	PURG	3.66085	0.0405396	0.0380657
MorphineSIV	PLAGL1	1.0919	0.0417162	0.152928
MorphineSIV	HERC6	0.65142	0.041733	0.133494
MorphineSIV	MTUS1	0.826297	0.0417661	0.473391
MorphineSIV	BAG3	1.81483	0.0418911	0.210471
MorphineSIV	HHAT	0.840188	0.0419283	0.120102
MorphineSIV	FOXP4	0.679148	0.0419578	0.022382
MorphineSIV	DSE	0.630866	0.0422076	0.210812
MorphineSIV	LOC106998674	1.56096	0.0422076	0.153516
MorphineSIV	CASP10	0.507327	0.0429434	0.141982
MorphineSIV	BTRC	0.612687	0.0433559	0.414308
MorphineSIV	MDFIC	0.564151	0.0445167	0.800778
MorphineSIV	PLD1	0.698675	0.0445825	0.796124
MorphineSIV	FBXO33	0.735906	0.0449405	0.460786
MorphineSIV	MRAS	1.17038	0.0451438	0.0968997
MorphineSIV	LOC100427957	0.709113	0.0451458	0.192296
MorphineSIV	LOC114678363	1.46674	0.0463893	0.131116
MorphineSIV	LOC114676845	0.765168	0.0465494	0.439472
MorphineSIV	LRRC28	0.669572	0.0467537	0.293859
MorphineSIV	TMEM206	1.01623	0.0467729	0.144504
MorphineSIV	C9orf72	0.516972	0.0470185	0.486851
MorphineSIV	SMPD3	0.934598	0.0490652	0.192936
MorphineSIV	PROS1	1.03878	0.0491892	0.114667
MorphineSIV	PRKD3	0.709248	0.0491892	0.24092
MorphineSIV	RFC3	0.519265	0.0494073	0.101709
SalineSIV	LOC100499503	9.44544	6.09183e-138	15.4624
SalineSIV	LOC114679371	11.111	6.09183e-138	10.5782
SalineSIV	RBPMS	9.85168	6.09183e-138	12.0315
SalineSIV	LOC106998573	11.6431	9.69488e-134	6.39457
SalineSIV	ADORA2B	7.95158	5.62658e-132	25.2022
SalineSIV	LOC114673210	12.4853	8.24096e-131	1044.13
SalineSIV	BMT2	5.42702	2.69613e-114	54.5087
SalineSIV	TMTC2	3.3247	1.44573e-47	1.15809
SalineSIV	MNDA	0.928564	4.41141e-34	7.49059
SalineSIV	LOC106993196	0.760823	8.00532e-29	8.1825
SalineSIV	C7H15orf41	1.81923	3.31838e-20	0.817666
SalineSIV	LOC114673461	2.95482	5.51701e-18	0.426959
SalineSIV	CNN3	4.6293	2.41616e-17	0.403076
SalineSIV	LILRA3	2.03166	2.05909e-16	0.890918
SalineSIV	LOC714964	1.57873	5.91297e-16	0.828234
SalineSIV	RNF213	0.764301	4.60125e-13	2.68746
SalineSIV	DTNB	1.3533	6.61351e-13	0.886315
SalineSIV	SDC3	2.4164	2.31131e-11	0.376031
SalineSIV	EAF2	1.19574	6.58422e-10	0.84085
SalineSIV	UTRN	0.594505	8.26353e-10	2.25364
SalineSIV	PPP1R16B	2.20734	2.22732e-09	0.620418
SalineSIV	ZFP30	2.10615	2.97026e-08	0.340932
SalineSIV	PRCP	0.674681	3.24534e-08	1.0559
SalineSIV	EEF1A1	0.781365	3.63164e-08	2.81627
SalineSIV	PDE8B	0.722603	7.23741e-08	1.26489
SalineSIV	SIK1	0.8444	2.05454e-07	1.14201
SalineSIV	LILRA5	1.08579	5.69744e-07	0.543399
SalineSIV	MFSD1	0.793502	1.20126e-06	0.639945
SalineSIV	LRMP	0.670874	1.4135e-06	1.01139
SalineSIV	MCOLN2	1.67735	2.89571e-06	0.350893
SalineSIV	EPSTI1	0.76532	2.89571e-06	1.40773
SalineSIV	LOC720791	2.01955	3.29649e-06	0.198475
SalineSIV	RGS9	1.48836	5.95573e-06	0.37665
SalineSIV	IFI6	0.974914	6.79263e-06	0.826879
SalineSIV	CPED1	0.659282	8.35298e-06	0.693031
SalineSIV	EIF4E3	0.72275	1.06048e-05	0.993145
SalineSIV	BTBD11	1.43318	1.10309e-05	0.570493
SalineSIV	PNPLA6	0.971328	1.46347e-05	0.588078
SalineSIV	HES4	1.72631	1.93381e-05	0.236561
SalineSIV	SRI	0.585304	3.35569e-05	1.17325
SalineSIV	SMPD3	1.69835	3.40236e-05	0.467724
SalineSIV	MAP3K8	0.849016	4.66487e-05	0.886573
SalineSIV	DUSP5	0.590508	7.42223e-05	1.3961
SalineSIV	TENM4	3.20465	7.96507e-05	0.233038
SalineSIV	ST3GAL6	0.814225	8.32716e-05	1.09348
SalineSIV	LOC696937	5.68888	9.08733e-05	0.10117
SalineSIV	APOBEC3B	4.43828	9.65377e-05	0.116409
SalineSIV	DENND3	0.579177	0.000104086	1.06034
SalineSIV	HRH1	0.812056	0.000130994	0.695046
SalineSIV	STK38	0.68965	0.000136042	1.03508
SalineSIV	LOC114677708	1.11749	0.000166027	0.436201
SalineSIV	CPD	0.558388	0.000211185	0.803413
SalineSIV	PNP	1.37781	0.000226899	0.426653
SalineSIV	LOC114677367	2.82642	0.000259451	0.0765354
SalineSIV	NOCT	0.501278	0.000280385	0.904978
SalineSIV	LOC701212	1.87402	0.000280427	0.124165
SalineSIV	TMC6	1.36564	0.000290633	0.224059
SalineSIV	ANKRD22	2.4608	0.000331877	0.161522
SalineSIV	LOC114671323	0.861916	0.00035221	0.520539
SalineSIV	CCNL2	1.62754	0.000353217	0.181283
SalineSIV	PTPRE	0.50617	0.000366291	1.09505
SalineSIV	PTAFR	0.556921	0.000426657	0.603491
SalineSIV	ECE1	2.10828	0.000481324	0.174856
SalineSIV	RBFOX1	1.06925	0.000572723	0.146593
SalineSIV	LOC114671073	4.4977	0.000866523	0.0808388
SalineSIV	BANP	0.533722	0.000877719	0.666443
SalineSIV	CPLANE1	0.581486	0.000914732	0.646346
SalineSIV	WARS	0.544253	0.000984968	1.65065
SalineSIV	USP18	2.61641	0.000984968	0.119373
SalineSIV	KRBOX4	1.00643	0.000992257	0.265773
SalineSIV	HIVEP2	0.595301	0.00111799	1.04773
SalineSIV	STAT6	0.779607	0.00112927	0.475543
SalineSIV	FMNL2	0.674819	0.00121139	1.03605
SalineSIV	SULF2	1.21803	0.00127213	0.665485
SalineSIV	PFN1	0.577337	0.00156644	2.45181
SalineSIV	UCKL1	0.786754	0.00164028	0.359387
SalineSIV	KCNH1	2.03698	0.00171595	0.294741
SalineSIV	PADI3	2.47327	0.00176934	0.0858978
SalineSIV	PTX3	0.896194	0.00179888	0.433602
SalineSIV	FAT2	2.85985	0.00180378	0.125289
SalineSIV	LOC100499551	4.94523	0.00192357	0.0596157
SalineSIV	XPO6	0.503473	0.00234155	0.680388
SalineSIV	LOC114678430	4.19644	0.00259966	0.0639678
SalineSIV	CTSD	0.774887	0.00262336	0.300145
SalineSIV	LGALS3BP	0.617421	0.00263844	0.293503
SalineSIV	ZNF703	1.03414	0.00264982	0.395229
SalineSIV	LOC100424132	0.650781	0.00276972	0.345251
SalineSIV	MLKL	1.47025	0.0028783	0.3844
SalineSIV	WDR63	1.32674	0.00420869	0.179138
SalineSIV	HK3	0.624743	0.00425005	0.509863
SalineSIV	INSIG1	0.647758	0.00459378	1.00339
SalineSIV	RHOU	1.57508	0.00485105	0.203468
SalineSIV	PARP4	0.931373	0.00518819	0.399883
SalineSIV	TMEM140	0.896529	0.00540935	0.623366
SalineSIV	PPP1R15A	0.63383	0.00547222	0.881652
SalineSIV	LILRA4	1.72894	0.0055037	0.104893
SalineSIV	ABCG1	1.97824	0.00669963	0.103121
SalineSIV	TSPAN4	1.14481	0.00703759	0.144188
SalineSIV	SLC9A7	0.747233	0.0076388	0.393798
SalineSIV	FYN	0.622579	0.00808356	0.555195
SalineSIV	LOC712405	0.66636	0.00812936	0.367328
SalineSIV	SQSTM1	0.607807	0.00813819	1.09499
SalineSIV	MYH10	1.98598	0.00915812	0.0757055
SalineSIV	LOC106999849	1.31329	0.00945172	0.33704
SalineSIV	AMDHD1	0.922829	0.0107092	0.265712
SalineSIV	LOC100426497	3.86198	0.0130019	0.0529207
SalineSIV	LOC106994920	1.40757	0.0132275	0.212942
SalineSIV	HBEGF	0.749632	0.0133365	0.447551
SalineSIV	SECTM1	1.01908	0.0138413	0.110182
SalineSIV	MBNL2	0.536843	0.0138493	0.39565
SalineSIV	LARGE1	0.532726	0.0140397	0.409655
SalineSIV	RHOF	0.626052	0.014146	0.200332
SalineSIV	FCRL3	2.5119	0.0159837	0.118141
SalineSIV	TNNI2	0.66045	0.0163929	0.111717
SalineSIV	MTCH1	0.882708	0.0173212	0.321756
SalineSIV	KLHL6	0.652053	0.0173436	0.50526
SalineSIV	MAMU-DPB	0.738662	0.0173738	0.667407
SalineSIV	LOC722929	0.718879	0.0184102	0.312855
SalineSIV	TEPSIN	0.968872	0.0184102	0.127683
SalineSIV	RAB3IP	0.90729	0.0185608	0.0949412
SalineSIV	MX1	0.674437	0.0188057	0.594365
SalineSIV	CMTR1	1.30276	0.0213313	0.269193
SalineSIV	RIPK2	0.512834	0.0213313	1.16354
SalineSIV	LFNG	0.703155	0.0213895	0.44212
SalineSIV	IFIT1	1.3554	0.0229634	0.0925601
SalineSIV	ESRRA	0.891733	0.0247568	0.326768
SalineSIV	ELP6	1.15836	0.0254126	0.0699369
SalineSIV	TRIM5	0.691524	0.0263112	0.436885
SalineSIV	IFIT3	0.972875	0.0284195	0.196565
SalineSIV	PARVB	1.04223	0.0284195	0.458673
SalineSIV	SARS	0.573185	0.0286272	0.315894
SalineSIV	ZPLD1	1.10404	0.0286272	0.151124
SalineSIV	LOC106996136	1.44555	0.029312	0.257509
SalineSIV	DPY19L1	0.50765	0.0293315	0.376062
SalineSIV	MAP1LC3A	0.940083	0.0293876	0.140451
SalineSIV	LOC698738	1.2616	0.0300019	0.0856608
SalineSIV	NCF1	0.875123	0.0304069	0.557643
SalineSIV	DDIT3	0.683931	0.0308365	0.250409
SalineSIV	SNRNP70	0.683909	0.0323956	0.402762
SalineSIV	LOC107000344	2.63566	0.0332861	0.0552902
SalineSIV	LOC716637	1.059	0.0332861	0.212906
SalineSIV	SLC15A2	0.598186	0.0336319	0.432801
SalineSIV	LOC106998328	2.13633	0.0342029	0.0489752
SalineSIV	SCAMP5	0.669507	0.0362022	0.141978
SalineSIV	A4GALT	1.71412	0.0366483	0.169166
SalineSIV	CDH23	0.555003	0.0369528	0.379948
SalineSIV	LOC106992517	1.74997	0.0382818	0.0580641
SalineSIV	LOC114673980	0.568245	0.0393762	0.264533
SalineSIV	ADORA2A	2.41749	0.0394166	0.0688909
SalineSIV	LOC106997543	1.989	0.0408062	0.100426
SalineSIV	LOC114671090	1.7938	0.0425948	0.0563077
SalineSIV	PLEKHG6	2.35743	0.0432071	0.0345204
SalineSIV	GPR155	0.733858	0.0432664	0.295337
SalineSIV	LOC705327	1.65859	0.0436194	0.0642228
SalineSIV	SLC47A1	0.925672	0.044256	0.393909
SalineSIV	RNF114	0.529432	0.0447308	0.315908
SalineSIV	BRD9	0.629074	0.0459266	0.372456
SalineSIV	LOC100425060	1.462	0.0459266	0.0664409
SalineSIV	LOC106997742	3.38707	0.0477199	0.0848991
SalineSIV	TBC1D10C	0.560539	0.0479751	0.182898
SalineSIV	PPP6R2	0.586141	0.0480439	0.453868
SalineSIV	MAPRE3	2.50145	0.0481204	0.0481358
SalineSIV	LOC106997715	3.80177	0.0482609	0.0258918
SalineSIV	LOC107000737	1.81392	0.0482609	0.0704273

## Sheet: Microglia-like
group_name	name	Log2FC	FDR	MeanDiff
Morphine	LOC114674534	0.630282	1.57429e-21	250.816
Morphine	SNX29	0.543108	8.85413e-13	9.72536
Morphine	PLD5	1.04923	1.37453e-11	5.82348
Morphine	ARHGAP26	0.737428	1.33684e-09	3.05056
Morphine	PLCB2	0.854501	2.83346e-09	4.50025
Morphine	SYNDIG1	0.848519	1.2724e-07	4.99802
Morphine	PRKD1	6.61659	5.29492e-07	1.10326
Morphine	ASTN2	0.527883	6.00625e-07	10.4658
Morphine	KCNAB1	2.16567	9.8884e-06	0.681082
Morphine	LOC698152	1.08543	1.00387e-05	1.30019
Morphine	C1H1orf127	3.21235	2.25819e-05	0.568164
Morphine	PRCP	0.687899	8.29724e-05	1.71576
Morphine	PREX1	0.514654	8.58939e-05	3.38664
Morphine	SRRM2	0.509453	8.98507e-05	2.79905
Morphine	CHRNA7	1.6785	9.87401e-05	0.815609
Morphine	TOP1MT	0.744558	0.000155443	1.53166
Morphine	CLEC7A	2.74662	0.000606063	0.6563
Morphine	ADCY7	0.828264	0.000622871	1.45203
Morphine	CNTNAP4	6.88791	0.000734031	0.234864
Morphine	SMIM35	1.62005	0.00108686	0.578532
Morphine	AP4E1	0.85124	0.0012263	0.678578
Morphine	EPHB1	1.66458	0.0012834	0.230576
Morphine	CYSLTR1	0.82306	0.00132047	2.14214
Morphine	RCOR1	0.735635	0.00178458	0.777264
Morphine	PASK	0.998916	0.00214948	0.529473
Morphine	NHSL1	1.60585	0.00215771	0.517552
Morphine	MNDA	0.513052	0.00220791	2.11436
Morphine	RGS6	1.35076	0.00220791	1.04973
Morphine	SCMH1	0.521856	0.00365285	1.4342
Morphine	TNK2	0.918087	0.00473672	1.17196
Morphine	DCAF6	0.913356	0.00479216	1.1921
Morphine	ZFC3H1	0.571632	0.0049422	0.923246
Morphine	ACSM3	2.48036	0.00542823	0.368093
Morphine	CEP112	1.28697	0.00683714	0.655764
Morphine	BOD1L1	0.734575	0.00810155	1.5792
Morphine	CPLANE1	0.667834	0.0113963	0.868546
Morphine	LOC106999943	1.51408	0.0113963	0.38376
Morphine	KLC1	0.792222	0.0115144	0.811004
Morphine	TBL1X	1.10508	0.0138152	0.88055
Morphine	OGT	0.572239	0.0142879	1.31613
Morphine	POLR3G	1.53936	0.0177164	0.644077
Morphine	LOC715936	1.33156	0.0179557	0.63639
Morphine	USP8	0.633447	0.0179557	0.81674
Morphine	GPHN	1.03951	0.0179557	1.3389
Morphine	SEPTIN9	1.82658	0.0195892	0.861552
Morphine	LOC712294	0.75614	0.0216087	0.899763
Morphine	ANKH	0.64992	0.0250234	0.73698
Morphine	CACNA2D1	4.04862	0.0257071	0.344352
Morphine	AKT3	0.671675	0.027976	1.11512
Morphine	MTHFR	0.682577	0.0299464	0.484992
Morphine	NAIP	0.83863	0.0299464	0.445627
Morphine	CWF19L2	0.851268	0.0299464	0.740626
Morphine	PDCD1LG2	1.13396	0.0299464	0.749601
Morphine	CALCOCO2	0.850193	0.0327637	0.551033
Morphine	TNIK	4.22253	0.0329344	0.229496
Morphine	LOC114676795	2.33653	0.0343764	0.267934
Morphine	TRRAP	0.681044	0.03575	0.534063
Morphine	SAP30L	2.63127	0.0370983	0.238036
Morphine	ADCY10	2.76572	0.0394812	0.286642
Morphine	ANKRD27	0.919072	0.0409419	0.375018
Morphine	ZFP30	1.39435	0.0461229	0.350707
Morphine	SP110	0.505951	0.0465865	2.37736
Morphine	SFPQ	0.563129	0.0478618	1.46281
MorphineSIV	ABR	0.57419	2.02155e-15	15.5408
MorphineSIV	ARHGAP26	1.02569	4.08064e-12	4.67496
MorphineSIV	LOC106993196	0.70746	7.51539e-12	11.1826
MorphineSIV	SNX29	0.507914	9.2797e-10	9.07184
MorphineSIV	HS3ST4	1.87831	1.91848e-08	3.12292
MorphineSIV	JDP2	1.0886	3.03766e-07	3.86301
MorphineSIV	PER1	1.2467	1.81323e-06	2.32577
MorphineSIV	LOC698152	1.58846	2.33035e-06	1.61032
MorphineSIV	RASA3	0.852978	2.33035e-06	3.08746
MorphineSIV	PLCB2	0.645862	3.78024e-06	3.33035
MorphineSIV	TOP1MT	1.02155	1.04248e-05	2.41901
MorphineSIV	SRRM2	0.591966	1.09056e-05	3.30935
MorphineSIV	CHST11	0.588255	1.467e-05	5.32743
MorphineSIV	CLEC7A	2.93846	2.95236e-05	0.776885
MorphineSIV	PREX1	0.523455	3.54551e-05	3.9885
MorphineSIV	CD163	1.05996	6.37305e-05	3.65959
MorphineSIV	CMIP	0.515394	6.56762e-05	4.02282
MorphineSIV	RAPGEF1	0.659427	0.000147152	3.15905
MorphineSIV	MSR1	0.840218	0.000161539	2.91801
MorphineSIV	ETS2	0.933105	0.00018148	2.31633
MorphineSIV	SKI	0.766453	0.000457948	3.11446
MorphineSIV	ATP13A3	1.22333	0.000496307	1.78136
MorphineSIV	CYSLTR1	1.00529	0.000499076	2.62183
MorphineSIV	RAB20	1.11982	0.000710387	1.79317
MorphineSIV	CCNL1	0.66357	0.000741636	2.68391
MorphineSIV	ADGRL2	2.51539	0.000793477	0.709311
MorphineSIV	EIF5	0.740524	0.000803749	1.92522
MorphineSIV	LOC114676795	2.7024	0.000952136	0.573297
MorphineSIV	LOC693820	1.73126	0.000988491	0.754346
MorphineSIV	ADAMTSL2	3.83412	0.00111196	0.457168
MorphineSIV	GNG7	0.533452	0.0016666	3.21434
MorphineSIV	CBFA2T3	1.65841	0.002073	0.47283
MorphineSIV	TBC1D22A	0.591522	0.00261472	3.16911
MorphineSIV	ANKRD36C	1.86507	0.00361382	1.37823
MorphineSIV	GLUL	1.03588	0.00409661	1.35131
MorphineSIV	TAL1	0.87331	0.00555145	1.69276
MorphineSIV	NR4A1	1.13205	0.00555145	1.25135
MorphineSIV	CTBP2	0.6144	0.0083547	2.30892
MorphineSIV	FCRL1	5.10855	0.00959576	0.211463
MorphineSIV	ITPK1	1.08396	0.0104022	1.14619
MorphineSIV	PANX1	1.0658	0.0123584	2.77118
MorphineSIV	DDX31	1.80867	0.0144413	0.775392
MorphineSIV	THSD4	1.04981	0.0180245	1.33023
MorphineSIV	BTBD19	1.19853	0.0194943	0.692619
MorphineSIV	PITPNM1	2.31548	0.0194943	0.275448
MorphineSIV	SEPTIN9	1.31022	0.0227122	0.663606
MorphineSIV	ST3GAL1	1.07467	0.0235208	1.42233
MorphineSIV	LOC705327	7.08033	0.0235208	0.268659
MorphineSIV	BAIAP2	0.884535	0.0235297	1.53451
MorphineSIV	HIVEP3	0.668281	0.0242984	2.32591
MorphineSIV	GAS6	1.05438	0.0267383	1.13372
MorphineSIV	TNK2	1.01013	0.0286752	1.32221
MorphineSIV	NCK2	0.550866	0.0319917	1.71039
MorphineSIV	HYDIN	1.27165	0.0319917	0.474412
MorphineSIV	SLC38A10	1.62237	0.0334133	0.65149
MorphineSIV	ARHGAP4	0.691125	0.0340803	1.1192
MorphineSIV	LOC114673210	2.29596	0.0346366	0.2924
MorphineSIV	DPP7	0.694568	0.0390181	1.05523
MorphineSIV	MAPKAPK2	1.34112	0.0416051	0.948066
MorphineSIV	LYN	0.541571	0.0426036	2.49493
MorphineSIV	HMGA2	1.80328	0.046591	0.614236
MorphineSIV	OGT	0.605823	0.0481094	1.4177
MorphineSIV	ZC3H12B	4.66214	0.0485696	0.918608
MorphineSIV	RAB6B	2.72581	0.0492348	0.20288
SalineSIV	LOC114673210	10.499	1.99027e-49	170.622
SalineSIV	BMT2	4.62952	9.80122e-26	12.7846
SalineSIV	ADORA2B	7.52484	3.40475e-25	5.95702
SalineSIV	LOC100499503	6.40557	2.49539e-17	2.19111
SalineSIV	LOC114679371	5.79932	2.38926e-14	1.60217
SalineSIV	RBPMS	9.93525	1.14046e-13	1.95612
SalineSIV	MNDA	1.04112	2.30053e-11	4.45957
SalineSIV	LOC114674534	0.612626	2.65383e-11	239.266
SalineSIV	LOC106998573	9.19378	1.16025e-09	1.1692
SalineSIV	LOC106999000	8.54637	1.39244e-08	0.74573
SalineSIV	MYO1D	5.67801	4.99681e-08	0.96068
SalineSIV	RPL37	1.30443	2.00541e-07	1.96769
SalineSIV	CLEC7A	4.60251	1.91238e-06	0.946672
SalineSIV	LOC693820	2.43228	2.17533e-05	1.09796
SalineSIV	SRGN	0.554656	0.000163179	4.27704
SalineSIV	C4H6orf62	0.692739	0.000414629	2.53483
SalineSIV	RPS15A	0.977205	0.000773945	1.63965
SalineSIV	KLF2	0.945322	0.000971066	1.77593
SalineSIV	TMC6	4.2642	0.000971788	0.523271
SalineSIV	SYNDIG1	0.765632	0.00319386	3.38639
SalineSIV	MLXIPL	1.13904	0.00561797	1.24342
SalineSIV	IL10RA	0.955132	0.00627489	0.882541
SalineSIV	SNRNP70	0.918585	0.00758905	1.58067
SalineSIV	STAB1	0.661932	0.00988134	1.76088
SalineSIV	RPS12	0.798467	0.0105672	1.76531
SalineSIV	MAMU-A	1.69297	0.0105672	0.732398
SalineSIV	TNIK	3.7381	0.0117314	0.368921
SalineSIV	MSR1	0.518504	0.0200582	1.35993
SalineSIV	RPL41	0.50483	0.0217868	1.96497
SalineSIV	FUS	0.58621	0.0243382	0.954544
SalineSIV	C1H1orf127	2.65106	0.0262425	0.421919
SalineSIV	OLR1	0.569503	0.032261	1.38698
SalineSIV	LOC704083	2.68454	0.0329978	0.403372
SalineSIV	SLC22A15	2.07984	0.0430636	0.386876
SalineSIV	TPM3	0.828706	0.0443716	0.859334
SalineSIV	ARHGEF10L	1.22232	0.0474065	0.577339
SalineSIV	SLC11A1	0.783031	0.0497189	1.16497

## Sheet: CD14+CAM
group_name	name	Log2FC	FDR	MeanDiff
Morphine	RPL37	1.81481	1.95019e-11	3.18772
Morphine	RPS15A	1.3252	1.75605e-09	3.99038
Morphine	PRCP	0.84603	6.26169e-06	2.00213
Morphine	CD163	0.965807	6.89824e-05	4.72201
Morphine	CCL13	5.26985	0.000190831	0.528943
Morphine	RPS27	0.740138	0.000468979	3.35273
Morphine	RPS29	0.586951	0.000964196	3.10866
Morphine	RPL36	0.732872	0.00103701	1.33701
Morphine	LOC704083	2.09401	0.00109663	1.86751
Morphine	RPS23	0.604534	0.00140729	2.53038
Morphine	PRKD1	3.06907	0.00342054	0.443236
Morphine	RPS21	0.731094	0.00342054	2.94321
Morphine	RPL37A_1	0.612126	0.00472414	1.90431
Morphine	RPS24	0.6325	0.00507903	1.64253
Morphine	RPS25	0.699452	0.00666212	1.18132
Morphine	SMIM35	1.525	0.00800465	0.664128
Morphine	MRC1	0.834479	0.0111789	5.3198
Morphine	SEMA3C	2.31389	0.0130995	0.496435
Morphine	MICALL1	4.92097	0.0132009	0.15582
Morphine	HEXB	0.745456	0.0178831	0.930338
Morphine	PPP2R2B	2.2685	0.0178831	0.486094
Morphine	ATP6V1D	2.3632	0.0182092	0.337606
Morphine	CCNG2	0.745811	0.022727	0.323846
Morphine	TMEM258	1.66254	0.0306503	0.269324
Morphine	GABRA3	2.67119	0.0324349	0.254206
Morphine	THSD7A	1.66933	0.0332102	0.944427
Morphine	DEPTOR	0.838448	0.0332102	1.62859
Morphine	RPL32	0.534637	0.0347828	0.727873
Morphine	QSER1	1.02604	0.0381462	0.584589
MorphineSIV	LOC693820	4.06541	7.55821e-52	2.32899
MorphineSIV	RPL37	1.4667	7.30024e-10	1.80364
MorphineSIV	PPP2R2B	2.83932	9.65764e-09	0.955719
MorphineSIV	RPL37A_1	0.62713	2.47709e-07	1.86386
MorphineSIV	HS3ST4	2.35843	2.74145e-07	1.71066
MorphineSIV	FKBP5	0.771049	3.2701e-07	5.0342
MorphineSIV	RPS27	0.631079	3.8787e-07	2.50223
MorphineSIV	SLC1A3	0.963538	1.36653e-06	3.18694
MorphineSIV	C1QC	0.56744	2.5834e-06	2.82362
MorphineSIV	CTSB	0.638595	8.22275e-06	3.19205
MorphineSIV	MAF	0.526293	1.60482e-05	2.1834
MorphineSIV	CCL13	2.84012	1.79588e-05	0.436367
MorphineSIV	FTL	0.624675	2.08137e-05	2.72175
MorphineSIV	SRGAP2	0.520263	2.41229e-05	9.26822
MorphineSIV	FRMD4A	0.578475	2.41229e-05	3.59612
MorphineSIV	CMIP	0.623571	2.41229e-05	1.96587
MorphineSIV	CD163	0.896206	3.75871e-05	4.33566
MorphineSIV	NFIA	0.635351	6.38614e-05	2.56454
MorphineSIV	TSPAN14	0.842902	8.67859e-05	1.17258
MorphineSIV	CTBP2	0.747913	0.000261671	1.0809
MorphineSIV	ATP11C	0.960638	0.000343411	0.922183
MorphineSIV	AUTS2	1.09269	0.000403872	5.59405
MorphineSIV	LOC106994692	3.24597	0.000690368	0.178022
MorphineSIV	GPNMB	1.79722	0.00088696	1.12748
MorphineSIV	LOC718777	0.862508	0.000897076	0.718289
MorphineSIV	LOC701504	1.09378	0.00131912	0.625723
MorphineSIV	IFNGR1	0.633932	0.00133489	1.3497
MorphineSIV	MYLIP	0.923503	0.00150145	1.19106
MorphineSIV	LOC109910386	0.810131	0.00150145	0.872394
MorphineSIV	P2RY12	0.538401	0.00184371	2.37469
MorphineSIV	ANKRD36C	2.56633	0.00200648	0.529942
MorphineSIV	MCF2L	1.05856	0.00207637	0.653734
MorphineSIV	TXNIP	0.509589	0.00215839	1.50391
MorphineSIV	KCNIP1	1.3926	0.00233162	0.768095
MorphineSIV	PARD3B	1.25813	0.00245757	0.870769
MorphineSIV	LGMN	0.626621	0.00257932	1.88816
MorphineSIV	SOCS6	1.03066	0.00291935	2.24973
MorphineSIV	ATRNL1	2.14979	0.00292755	0.781374
MorphineSIV	ITGAD	5.86974	0.00292755	0.190313
MorphineSIV	LOC705327	2.91621	0.00341898	0.141444
MorphineSIV	LOC698152	1.25747	0.00360781	0.582838
MorphineSIV	MACROD2	2.00055	0.00362642	0.530967
MorphineSIV	AGAP1	0.608468	0.00362642	0.899133
MorphineSIV	ABR	0.616459	0.00362642	2.53642
MorphineSIV	SGPL1	0.938894	0.00426036	1.13722
MorphineSIV	LOC716041	1.08772	0.00450464	0.277052
MorphineSIV	ABCC4	0.596709	0.00481889	2.71374
MorphineSIV	LOC106994091	0.995423	0.00487986	0.236545
MorphineSIV	HACD1	1.07699	0.00536277	0.396404
MorphineSIV	LHFPL2	0.91163	0.00615376	1.26876
MorphineSIV	LOC106997985	1.30463	0.00639649	0.276686
MorphineSIV	FCGR3	0.854836	0.00709602	0.361714
MorphineSIV	LILRB1	0.816708	0.00709602	0.805317
MorphineSIV	TNFRSF1B	0.559771	0.00770847	0.929035
MorphineSIV	CCDC180	1.83937	0.008828	0.235912
MorphineSIV	SLC24A3	0.59562	0.00946087	1.02282
MorphineSIV	NCAPH2	2.73687	0.0106399	0.157738
MorphineSIV	CHKA	0.510283	0.0106399	1.13123
MorphineSIV	CDC14B	0.825087	0.0107091	0.673839
MorphineSIV	RGL1	0.57844	0.0107197	3.26784
MorphineSIV	ARHGAP21	0.540312	0.0111815	1.6983
MorphineSIV	HSPBAP1	0.661544	0.0129723	0.597611
MorphineSIV	LOC114674664	4.2592	0.0133286	0.141175
MorphineSIV	ADGRL2	1.52111	0.0151061	1.5317
MorphineSIV	LOC114673210	1.70969	0.0151061	0.334895
MorphineSIV	VWF	0.870333	0.0151211	0.902772
MorphineSIV	NFIC	0.625082	0.0155353	0.597179
MorphineSIV	MTURN	3.00724	0.0171908	0.182551
MorphineSIV	NCK2	0.604754	0.0214482	0.948196
MorphineSIV	DEPTOR	0.596741	0.0239344	1.19066
MorphineSIV	IL6ST	0.614515	0.0282969	0.926918
MorphineSIV	LOC700872	3.86873	0.0326303	0.103003
MorphineSIV	CPNE4	3.81748	0.0331669	0.193294
MorphineSIV	FBXL13	1.27823	0.0345743	0.188314
MorphineSIV	LOC114679374	1.83977	0.0347315	0.205119
MorphineSIV	TRIP6	1.86482	0.0355538	0.145117
MorphineSIV	LOC114674176	2.50338	0.0389179	0.0932448
MorphineSIV	CPM	0.788639	0.0420827	2.78657
MorphineSIV	ADAM28	0.711494	0.0463857	0.926312
SalineSIV	LOC114673210	10.6944	7.52201e-45	288.716
SalineSIV	ADORA2B	8.13666	4.55089e-34	7.65135
SalineSIV	LOC100499503	7.95747	1.20413e-31	4.11184
SalineSIV	RBPMS	9.27874	5.50309e-31	4.48274
SalineSIV	LOC114679371	7.85983	4.96574e-30	2.76761
SalineSIV	LOC106998573	9.00491	1.10361e-24	1.70915
SalineSIV	BMT2	4.677	1.5553e-19	18.0735
SalineSIV	CCL13	4.988	3.05965e-16	1.42265
SalineSIV	LOC106993196	0.690782	1.71223e-13	9.30754
SalineSIV	MNDA	0.687512	8.57777e-09	3.42798
SalineSIV	RPL37	1.17214	2.21577e-08	1.50499
SalineSIV	PLXND1	1.22198	3.03216e-08	1.93745
SalineSIV	TMTC2	2.92329	6.84289e-08	0.483024
SalineSIV	STAB1	0.903985	9.38503e-08	4.51203
SalineSIV	PLEKHG5	1.36926	2.08118e-06	0.833688
SalineSIV	KLF2	0.981383	2.2825e-06	2.93289
SalineSIV	RND3	2.31483	2.39887e-06	2.32744
SalineSIV	CCDC141	1.831	2.39887e-06	1.89346
SalineSIV	DAB2	0.669005	1.44191e-05	9.81053
SalineSIV	LOC697689	1.28106	2.5536e-05	0.902162
SalineSIV	CD163	0.868617	5.65688e-05	4.5339
SalineSIV	ABR	0.731381	6.76652e-05	3.08859
SalineSIV	LOC697476	1.04371	0.000110286	1.14057
SalineSIV	TTN	1.87669	0.000233578	2.65686
SalineSIV	GAS6	0.718454	0.000326353	0.848344
SalineSIV	LOC114678953	1.77865	0.000352662	0.790904
SalineSIV	LOC718777	1.03542	0.000858026	0.89784
SalineSIV	SIGLEC1	1.3591	0.00160365	1.0379
SalineSIV	SNX8	1.24773	0.00189602	0.491053
SalineSIV	LOC706774	3.23873	0.00229979	0.18941
SalineSIV	LOC106999317	1.15628	0.00314246	0.325824
SalineSIV	TMC6	4.35287	0.00326835	0.240366
SalineSIV	LOC114676795	2.55083	0.00331519	0.410688
SalineSIV	COLEC12	0.526221	0.00339926	4.18454
SalineSIV	LOC114673461	3.01303	0.00363824	0.153754
SalineSIV	TMEM106C	1.80808	0.00424753	0.345774
SalineSIV	RNASEK	0.859847	0.00451597	0.5939
SalineSIV	DNM1	1.43769	0.00458669	0.745564
SalineSIV	RGL1	0.511973	0.00565472	3.2849
SalineSIV	LOC714964	0.838572	0.00565472	0.436783
SalineSIV	LOC106995137	0.670668	0.00590596	1.04496
SalineSIV	MFSD1	0.75808	0.00618084	0.942062
SalineSIV	LPL	1.16551	0.00636737	1.08533
SalineSIV	TNS1	1.37404	0.00791851	0.644841
SalineSIV	DOP1B	0.78272	0.0105032	0.695902
SalineSIV	LOC106995258	1.72274	0.0142886	0.301499
SalineSIV	FCGR2B	1.51026	0.0150977	0.560751
SalineSIV	C2CD5	0.565987	0.0151877	0.974938
SalineSIV	IL6R	0.649935	0.0159706	0.680288
SalineSIV	FABP5	1.89955	0.0159706	0.327982
SalineSIV	CCDC180	1.98757	0.0159706	0.308107
SalineSIV	LOC698738	2.45012	0.0168655	0.388842
SalineSIV	GPNMB	1.45527	0.0202368	0.849139
SalineSIV	TRIM50	4.09917	0.0210802	0.0999951
SalineSIV	SNRNP70	0.702108	0.0223219	0.789023
SalineSIV	TNFRSF25	1.89609	0.0231975	0.428343
SalineSIV	PDGFB	0.893674	0.025795	0.783091
SalineSIV	SPATS2L	1.01934	0.0272833	0.727473
SalineSIV	CNN3	2.47072	0.0278617	0.129604
SalineSIV	STRN4	1.54513	0.0290974	0.26051
SalineSIV	DPP7	0.961171	0.0296258	0.550274
SalineSIV	TOP1MT	0.668268	0.0302381	1.25457
SalineSIV	CD93	1.43189	0.0306673	0.319953
SalineSIV	IFFO1	1.36883	0.0337574	0.421341
SalineSIV	RHOB	0.638487	0.0337574	1.22267
SalineSIV	HEXB	0.594688	0.0363122	0.776894
SalineSIV	ATRNL1	1.2981	0.0431765	0.56017
SalineSIV	DHRS3	1.10442	0.0451352	0.631546
SalineSIV	PLA2G15	0.597283	0.0456817	0.451467
SalineSIV	LGMN	0.528516	0.0458897	1.71578

## Sheet: Preactivated
group_name	name	Log2FC	FDR	MeanDiff
Morphine	CLEC7A	2.67736	1.46316e-07	3.58535
Morphine	ASTN2	0.563983	0.013553	5.01695
Morphine	SFPQ	0.772278	0.0209897	2.37789
Morphine	MNDA	0.702435	0.0300524	3.10665
Morphine	CTTNBP2	0.748195	0.0300524	2.31487
Morphine	HIST1H2BK	1.38866	0.0300524	1.3749
MorphineSIV	LOC693820	3.17026	6.81823e-13	1.42575
MorphineSIV	FKBP5	0.746093	0.000253534	3.49734
MorphineSIV	RPL37	0.95323	0.000486437	1.28704
MorphineSIV	DMXL2	1.83648	0.000515826	0.834193
MorphineSIV	RAB20	1.14045	0.00215829	2.05536
MorphineSIV	CLEC7A	1.19849	0.00224553	0.800362
MorphineSIV	RPL26	0.618084	0.00236138	0.930041
MorphineSIV	HS3ST4	1.86592	0.00236138	2.2873
MorphineSIV	VAV3	0.54525	0.00275127	7.44255
MorphineSIV	DOCK4	0.554267	0.00275127	8.84385
MorphineSIV	GASK1B	1.47167	0.00275127	0.821854
MorphineSIV	DTNBP1	0.755861	0.00432397	1.05799
MorphineSIV	BRD9	0.903525	0.00432397	0.508107
MorphineSIV	ARHGAP26	0.758105	0.00432397	2.6661
MorphineSIV	RPS14	0.519648	0.00479335	1.54251
MorphineSIV	LOC114674664	3.63031	0.00498055	0.438817
MorphineSIV	LOC106995967	3.02447	0.0112448	0.429734
MorphineSIV	NXN	1.8878	0.0114955	0.41992
MorphineSIV	ATP13A3	1.00158	0.0122009	2.63296
MorphineSIV	TMEM30A	0.979115	0.0122009	0.375416
MorphineSIV	MAML3	0.675124	0.0122009	2.46991
MorphineSIV	ADAM28	0.808433	0.0122009	2.34397
MorphineSIV	LOC698152	1.25905	0.0126974	0.651075
MorphineSIV	SFPQ	0.601817	0.012861	1.91672
MorphineSIV	TBC1D14	0.821444	0.0157244	1.39268
MorphineSIV	LOC114679374	1.678	0.0164663	0.20037
MorphineSIV	TCF12	0.531747	0.0164663	2.74184
MorphineSIV	SNX13	0.848056	0.0175185	1.43248
MorphineSIV	RTN1	0.847817	0.0241863	0.962511
MorphineSIV	LOC114673210	2.60183	0.0244956	0.501531
MorphineSIV	SUSD1	1.8037	0.0248025	0.433938
MorphineSIV	CD163	0.713885	0.0286908	2.92957
MorphineSIV	RNLS	1.32584	0.0313056	1.24306
MorphineSIV	MSR1	1.09374	0.0318855	3.54438
MorphineSIV	RPS7	0.655737	0.0358288	0.928817
MorphineSIV	CTSB	0.654379	0.0373606	2.5493
MorphineSIV	CD2AP	0.897951	0.0420388	1.19448
MorphineSIV	SEPTIN9	1.44973	0.0420388	0.249732
MorphineSIV	PLCG2	0.584266	0.0420388	1.33348
MorphineSIV	GSPT1	1.06573	0.0488691	0.690755
SalineSIV	LOC114673210	9.55152	9.63918e-16	130.884
SalineSIV	ADORA2B	8.56698	1.74875e-13	5.52468
SalineSIV	MNDA	1.10483	4.23307e-11	5.75295
SalineSIV	LOC100499503	8.29488	8.46222e-09	1.56528
SalineSIV	RBPMS	6.04689	8.87423e-09	2.23396
SalineSIV	BMT2	4.55819	2.42806e-08	12.6804
SalineSIV	LOC114679371	7.71664	1.416e-06	1.04675
SalineSIV	LOC106998573	7.84473	2.31111e-06	1.14439
SalineSIV	RPL37	1.08141	2.88119e-05	1.45887
SalineSIV	ARG2	1.59433	0.000181799	1.88505
SalineSIV	LOC114674672	1.79505	0.00266138	0.616094
SalineSIV	ABR	0.552116	0.00266138	4.48857
SalineSIV	LOC106994091	1.70112	0.0030414	0.79882
SalineSIV	LOC718777	0.818567	0.00720731	0.789922
SalineSIV	TMSB10	0.691631	0.00721681	2.15381
SalineSIV	BTG2	0.569473	0.00786002	3.58382
SalineSIV	CHRNA1	1.5367	0.0124201	1.22528
SalineSIV	APOE	0.928816	0.0124201	3.4617
SalineSIV	RPL41	0.621923	0.0135086	2.51476
SalineSIV	EIF1	0.652731	0.0138576	2.46826
SalineSIV	PDGFB	1.05892	0.0213006	2.11779
SalineSIV	RHOB	0.646006	0.0247766	2.66752
SalineSIV	FTH1	0.594348	0.0247766	1.97291
SalineSIV	ZFP36	0.579869	0.0253366	4.83653
SalineSIV	NR4A1	1.34966	0.0259123	1.46131
SalineSIV	GADD45B	0.809402	0.0267512	1.46148
SalineSIV	TXNIP	0.698675	0.0270569	3.40681
SalineSIV	BCAS2	1.37799	0.0270569	1.32962
SalineSIV	LOC106997985	1.87018	0.0270569	0.310757
SalineSIV	LOC693820	1.89616	0.0277664	0.518614
SalineSIV	CCL4L1	0.875414	0.0292717	11.8374
SalineSIV	ATF4	0.83991	0.0297837	1.4549
SalineSIV	ETAA1	1.71599	0.0306698	0.652628
SalineSIV	TSPAN7	0.961633	0.0376813	0.333769
SalineSIV	OLR1	0.511886	0.0385877	2.08398
SalineSIV	MAMU-DRB1	0.904324	0.0445994	1.33628
SalineSIV	LOC714964	2.38768	0.0445994	0.398091
SalineSIV	PDE8B	5.56975	0.0445994	0.232482

## Sheet: Proliferating
group_name	name	Log2FC	FDR	MeanDiff
Morphine	ASTN2	1.07774	9.72382e-08	12.9553
Morphine	MEF2A	0.591537	3.904e-06	13.4389
Morphine	SNX29	0.809196	1.26277e-05	7.90459
Morphine	SCML4	1.16047	6.31892e-05	5.0146
Morphine	LOC114676845	1.66138	7.88617e-05	2.2903
Morphine	KCNAB1	4.29911	0.000322027	1.15071
Morphine	CLEC7A	3.55311	0.000998775	0.983302
Morphine	RPS15A	1.27754	0.0012822	2.11096
Morphine	GNAQ	0.645299	0.00162083	4.0194
Morphine	PALLD	1.85608	0.0033213	0.973472
Morphine	PLAG1	1.59784	0.00364993	0.754463
Morphine	DNM3	0.565731	0.00491842	5.74066
Morphine	SKAP2	0.667556	0.00491842	3.92337
Morphine	ARHGAP26	0.801429	0.00509163	4.27363
Morphine	LRRK2	1.05189	0.00509245	1.86966
Morphine	PRCP	0.83577	0.00558947	1.77817
Morphine	RTTN	0.77892	0.00587845	8.80357
Morphine	KDM7A	0.856876	0.0061006	1.3525
Morphine	DCAF6	0.774431	0.00686365	1.1551
Morphine	PTPRJ	0.72273	0.00686365	3.26189
Morphine	MAML3	0.606009	0.00732959	2.7702
Morphine	DOCK2	0.692889	0.00810662	3.38889
Morphine	ROR2	1.33606	0.00815575	1.16241
Morphine	EXT1	1.15252	0.00959471	2.63742
Morphine	SCARB1	1.35879	0.00998206	0.883932
Morphine	GCNT2	1.88466	0.0106555	1.09322
Morphine	TRPM8	1.98461	0.0110351	0.783393
Morphine	LOC106992862	2.47712	0.0112431	0.804301
Morphine	PTK2	2.13082	0.0123155	1.17403
Morphine	SEPTIN9	2.3736	0.0150839	0.571844
Morphine	RAP1A	0.975137	0.0224481	1.126
Morphine	FAM149A	0.545579	0.0255406	3.19123
Morphine	FMNL3	0.627614	0.0255406	1.64742
Morphine	LOC106999008	0.870481	0.0311394	2.75289
Morphine	NAGLU	4.99895	0.0319028	0.295016
Morphine	CC2D2B	0.555058	0.0332255	9.70849
Morphine	GTF2I	0.556113	0.034366	1.06405
Morphine	APOE	0.942084	0.0363422	3.56272
Morphine	PTPRM	0.813075	0.038595	2.58278
Morphine	SAMHD1	1.10331	0.0402708	0.833338
Morphine	TLR6	1.62713	0.0446928	0.907127
Morphine	PALD1	0.519905	0.0462375	2.46576
MorphineSIV	LOC693820	3.60458	4.28907e-12	2.15446
MorphineSIV	JDP2	1.46413	0.00016665	4.16806
MorphineSIV	C1QA	0.780076	0.0028748	5.70695
MorphineSIV	ASTN2	0.783273	0.00518898	8.40991
MorphineSIV	C3	0.588406	0.00733749	6.19416
MorphineSIV	TXNIP	1.07974	0.00892247	3.40737
MorphineSIV	DCAF6	0.833422	0.00939459	1.27117
MorphineSIV	RPS27	0.717809	0.00973112	2.30393
MorphineSIV	RAB20	1.7221	0.00973112	2.25582
MorphineSIV	FKBP5	0.772607	0.013063	4.93929
MorphineSIV	CSF1R	0.606639	0.013063	3.25328
MorphineSIV	MAML3	0.770112	0.0160401	3.74318
MorphineSIV	HS3ST4	1.31144	0.0160401	1.81038
MorphineSIV	LTC4S	1.04028	0.018804	1.8727
MorphineSIV	SELPLG	0.732064	0.018804	2.12938
MorphineSIV	NR4A3	2.05598	0.0190964	1.04142
MorphineSIV	ATP13A3	1.27696	0.021785	3.08114
MorphineSIV	PI4K2A	0.95991	0.021785	1.95239
MorphineSIV	CTSB	0.609717	0.0293283	2.24447
MorphineSIV	ATP2B1	1.2633	0.0293283	3.34936
MorphineSIV	LOC114676845	1.18604	0.029422	1.3502
MorphineSIV	RPL38	0.585838	0.0311121	2.31289
MorphineSIV	SLC1A3	0.671359	0.033444	5.21773
MorphineSIV	KCTD12	0.73445	0.0337289	1.61916
MorphineSIV	FRMD4A	0.500192	0.0397644	5.61842
MorphineSIV	LOC712274	0.67797	0.0397644	1.23287
MorphineSIV	MAF	0.560192	0.0397644	3.06168
MorphineSIV	DEPTOR	0.962298	0.0405368	2.82914
MorphineSIV	EEF1A1	0.859205	0.0409401	1.12694
MorphineSIV	ARHGAP12	0.670825	0.0492058	2.55713
MorphineSIV	IL13RA1	0.859029	0.0492058	2.22883
SalineSIV	LOC114673210	10.1614	6.77949e-06	118.406
SalineSIV	ADORA2B	9.00863	7.94296e-05	5.97757
SalineSIV	LOC106995258	2.9608	0.000248693	1.19317
SalineSIV	MAMU-A	2.02363	0.000333857	1.37171
SalineSIV	LOC106993196	0.769779	0.000333857	9.13655
SalineSIV	MYO1D	4.04132	0.000750456	0.899742
SalineSIV	LOC100499503	7.34936	0.000918734	1.88456
SalineSIV	EGR3	2.98159	0.000918734	2.0686
SalineSIV	RBPMS	7.3359	0.000918734	1.86694
SalineSIV	ZFP36L1	0.955741	0.00121867	11.4197
SalineSIV	LOC106998573	6.99082	0.00133356	1.4673
SalineSIV	SRGN	0.665867	0.00133356	7.08657
SalineSIV	EGR1	4.67521	0.00180578	1.10392
SalineSIV	CD74	1.58788	0.00180578	6.54986
SalineSIV	MNDA	0.709752	0.00243851	4.1652
SalineSIV	MCL1	1.20713	0.00453947	1.93399
SalineSIV	OLR1	0.980596	0.00707702	4.19034
SalineSIV	MAMU-DMB	3.80928	0.007379	0.777107
SalineSIV	SLC11A1	2.46166	0.00755305	2.34833
SalineSIV	LOC703641	1.02981	0.0162789	2.3048
SalineSIV	HMGA2	1.82335	0.0197954	1.10131
SalineSIV	IFNAR2	1.54992	0.0494872	1.00442
SalineSIV	CLEC7A	4.56337	0.0494872	1.17721
