# Supplementary material for: Opioid-induced immunosuppression of brain myeloid cells in SIV-infected rhesus macaques
Source: Research Square preprint supplement (doi:10.21203/rs.3.rs-7394731/v1), 2025-09-18
Supplement: Supplementary file 6 [file bad1689698272c2972275225.xlsx]

## Sheet: Table S5 Hub genes for the gene
	gene_name	module	kME
1	YWHAZ	Module1	0.413054
2	GNA13	Module1	0.401405
3	TSC22D2	Module1	0.358625
4	PTPRC	Module1	0.33414
5	SIK3	Module1	0.333802
6	LYN	Module1	0.326758
7	ACTR2	Module1	0.326011
8	ATP13A3	Module1	0.323867
9	TGFBR2	Module1	0.319623
10	AKAP13	Module1	0.318486
11	PI4K2A	Module1	0.315222
12	LOC708686	Module1	0.288485
13	ABI1	Module1	0.286775
14	TOP1	Module1	0.284987
15	ETF1	Module1	0.283059
16	ARIH1	Module1	0.280799
17	FNDC3B	Module1	0.279942
18	PEAK1	Module1	0.276052
19	RAB1A	Module1	0.274657
20	KCNK13	Module1	0.274423
21	TM9SF3	Module1	0.273199
22	RANBP9	Module1	0.27027
23	ELL2	Module1	0.26874
24	C20H16orf72	Module1	0.268501
25	JDP2	Module1	0.268026
26	FBXO34	Module1	0.265943
27	NEDD9	Module1	0.263714
28	SMAP2	Module1	0.26281
29	HNRNPC	Module1	0.262663
30	UBE2D3	Module1	0.262168
31	ACTR3	Module1	0.260543
32	DENND4A	Module1	0.260021
33	YPEL5	Module1	0.259146
34	RTN4	Module1	0.257803
35	ATF7IP	Module1	0.257609
36	PLEK	Module1	0.257208
37	RYBP	Module1	0.257157
38	SHOC2	Module1	0.255145
39	ATP2B1	Module1	0.254494
40	PPP3R1	Module1	0.2541
41	NUFIP2	Module1	0.254097
42	ELOVL5	Module1	0.252949
43	2025-03-06	Module1	0.252737
44	RAP1B	Module1	0.252189
45	XPR1	Module1	0.251533
46	MKLN1	Module1	0.250745
47	HIF1A	Module1	0.25
48	CDC42SE2	Module1	0.245063
49	HNRNPU	Module1	0.243963
50	PIK3AP1	Module1	0.241903
51	RNF138	Module1	0.23979
52	CSNK1A1	Module1	0.239452
53	USP9X	Module1	0.239426
54	PTPN12	Module1	0.237138
55	REL	Module1	0.236678
56	SWAP70	Module1	0.235676
57	CD46	Module1	0.234072
58	ATP1B3	Module1	0.230193
59	PHLPP1	Module1	0.229951
60	ATP1A1	Module1	0.229633
61	NDEL1	Module1	0.229313
62	ZSWIM4	Module1	0.228992
63	PRDM2	Module1	0.228377
64	HIPK3	Module1	0.228363
65	YTHDF3	Module1	0.227858
66	FRMD4B	Module1	0.227297
67	SREK1	Module1	0.226836
68	CTNNB1	Module1	0.225388
69	DUSP10	Module1	0.225204
70	ANKRD10	Module1	0.22321
71	PPP2CA	Module1	0.223179
72	NUP98	Module1	0.223095
73	FAM126A	Module1	0.222278
74	NCOA3	Module1	0.221958
75	PSME4	Module1	0.220913
76	NFKB1	Module1	0.217636
77	PPM1A	Module1	0.217458
78	NR4A3	Module1	0.214717
79	VAPA	Module1	0.214686
80	MEF2C	Module1	0.211616
81	HNRNPLL	Module1	0.21066
82	STK4	Module1	0.210298
83	WSB1	Module1	0.209964
84	CNOT6L	Module1	0.209859
85	MIER1	Module1	0.209264
86	FAM49B	Module1	0.208629
87	TIPARP	Module1	0.208104
88	MTREX	Module1	0.206275
89	G3BP2	Module1	0.204806
90	RLIM	Module1	0.204453
91	ETNK1	Module1	0.204369
92	NUP153	Module1	0.203737
93	OSBPL11	Module1	0.203545
94	KPNA4	Module1	0.203232
95	PTPN1	Module1	0.202627
96	ZC3H13	Module1	0.199807
97	DNAJB6	Module1	0.198959
98	PLA2G4A	Module1	0.198219
99	CRY1	Module1	0.197716
100	CDC14B	Module1	0.197405
101	NAA50	Module1	0.19637
102	GOLPH3	Module1	0.19632
103	CASP7	Module1	0.196198
104	ZNRF2	Module1	0.195986
105	SUCO	Module1	0.195181
106	STX11	Module1	0.193989
107	AFTPH	Module1	0.193492
108	LOC694064	Module1	0.193093
109	LRRC8C	Module1	0.192699
110	WDR26	Module1	0.190926
111	SKIL	Module1	0.188307
112	PRKAR1A	Module1	0.187697
113	HS3ST1	Module1	0.186397
114	STK17A	Module1	0.18523
115	EFL1	Module1	0.185132
116	FAM107B	Module1	0.184845
117	ARL5B	Module1	0.181538
118	CSNK1G3	Module1	0.181074
119	ABCE1	Module1	0.179393
120	VPS26A	Module1	0.177552
121	DCTN4	Module1	0.176219
122	INTS6	Module1	0.175444
123	TMED10	Module1	0.175003
124	B4GALT1	Module1	0.174202
125	CHORDC1	Module1	0.173552
126	LONRF1	Module1	0.17352
127	WHRN	Module1	0.173517
128	PPP1R2	Module1	0.172911
129	NAF1	Module1	0.172822
130	CD55	Module1	0.172613
131	FOXN2	Module1	0.172425
132	AP2B1	Module1	0.172413
133	RC3H1	Module1	0.172065
134	RRP12	Module1	0.170645
135	SYNCRIP	Module1	0.168487
136	EED	Module1	0.167878
137	CCNK	Module1	0.167095
138	LRRC49	Module1	0.166196
139	OSBPL3	Module1	0.164523
140	PPARG	Module1	0.162511
141	RNASEH2B	Module1	0.16163
142	SCML1	Module1	0.160133
143	UBE2N	Module1	0.158394
144	LOC114676311	Module1	0.152899
145	DNAJC1	Module1	0.152725
146	MLF1	Module1	0.152553
147	C9orf72	Module1	0.151468
148	CALCRL	Module1	0.150485
149	HIPK1	Module1	0.149547
150	PNP	Module1	0.14751
151	DPH3	Module1	0.147257
152	GALM	Module1	0.141325
153	NABP1	Module1	0.140874
154	LOC114675375	Module1	0.134606
155	FEM1C	Module1	0.133056
156	SYTL3	Module1	0.131893
157	RPGR	Module1	0.126316
158	CFAP20	Module1	0.126268
159	RFX2	Module1	0.124374
160	OSM	Module1	0.12154
161	HMG20A	Module1	0.118265
162	NFE2L3	Module1	0.113749
163	FAM129A	Module1	0.11337
164	LETM2	Module1	0.10426
165	DNAJB4	Module1	0.103483
166	LOC100423077	Module1	0.0814922
167	C1QB	Module2	0.5672
168	C1QA	Module2	0.562421
169	VMO1	Module2	0.560427
170	B2M	Module2	0.544267
171	CFD	Module2	0.525441
172	TMSB4X	Module2	0.523386
173	C1QC	Module2	0.517173
174	RPL27A	Module2	0.517048
175	RPLP1	Module2	0.509228
176	RPS27A-1	Module2	0.50657
177	LOC705671	Module2	0.493269
178	RPS18	Module2	0.487457
179	RPL10	Module2	0.481231
180	RPL13	Module2	0.47775
181	RPS11	Module2	0.477389
182	RPS14	Module2	0.475743
183	RPS20	Module2	0.47529
184	TYROBP	Module2	0.467882
185	RPL23	Module2	0.465635
186	PSAP	Module2	0.46061
187	RPL23A	Module2	0.453995
188	CST3	Module2	0.453279
189	RPL41	Module2	0.452302
190	RPS27	Module2	0.450715
191	RPS15	Module2	0.449512
192	RPL18	Module2	0.447651
193	RPS28	Module2	0.447336
194	RPL34	Module2	0.447027
195	RPL30	Module2	0.444091
196	RPL13A	Module2	0.442247
197	RPL19	Module2	0.441578
198	RPLP2	Module2	0.438389
199	RPS19	Module2	0.438286
200	RPS16	Module2	0.437907
201	RPL38	Module2	0.43789
202	RPS3	Module2	0.43474
203	APOE	Module2	0.43434
204	FTL	Module2	0.433213
205	RPS8	Module2	0.431698
206	RPS21	Module2	0.423755
207	LOC703455	Module2	0.423328
208	C3	Module2	0.420344
209	RPS29	Module2	0.419179
210	RPS23	Module2	0.418052
211	RPL37A-1	Module2	0.415796
212	RPS13	Module2	0.413793
213	TPT1	Module2	0.408868
214	FAU	Module2	0.408704
215	RPL11	Module2	0.405932
216	FCER1G	Module2	0.403404
217	RPL21	Module2	0.396445
218	LOC696748	Module2	0.396376
219	RPS10	Module2	0.395333
220	CD81	Module2	0.391093
221	MARCKS	Module2	0.390498
222	RNASET2	Module2	0.385762
223	RPL8	Module2	0.382637
224	LOC712274	Module2	0.380368
225	RPS7	Module2	0.38015
226	ITM2C	Module2	0.379889
227	CSF1R	Module2	0.377989
228	UBA52	Module2	0.376059
229	RPL28	Module2	0.374227
230	RPL35A	Module2	0.373036
231	RPS17	Module2	0.372768
232	RPS2	Module2	0.371838
233	RPL27	Module2	0.371178
234	CD63	Module2	0.360532
235	RPLP0	Module2	0.359935
236	RPS12	Module2	0.359728
237	SERPINA1	Module2	0.358273
238	RPL3	Module2	0.356484
239	RPL7A	Module2	0.350773
240	RPL9	Module2	0.350449
241	RPS4X	Module2	0.34949
242	RPL17	Module2	0.34891
243	LOC703365	Module2	0.345879
244	SELPLG	Module2	0.345293
245	RPL26	Module2	0.338463
246	RPSA	Module2	0.337182
247	RPS5	Module2	0.334494
248	RPL10A	Module2	0.334
249	RPS24	Module2	0.332964
250	RPL5	Module2	0.332692
251	RPL15	Module2	0.332417
252	LTC4S	Module2	0.329565
253	ITM2B	Module2	0.329557
254	RPS15A	Module2	0.329364
255	RPS9	Module2	0.325543
256	TOMM7	Module2	0.322685
257	GPX4	Module2	0.32265
258	AIF1	Module2	0.32218
259	CREG1	Module2	0.31979
260	RPL6	Module2	0.318486
261	P2RY12	Module2	0.318449
262	RPL35	Module2	0.318375
263	RPS25	Module2	0.31834
264	RPL36	Module2	0.317641
265	RPL24	Module2	0.317202
266	RPS26	Module2	0.317102
267	RPL37	Module2	0.312413
268	COX4I1	Module2	0.310414
269	RACK1	Module2	0.310031
270	CFL1	Module2	0.306191
271	NACA	Module2	0.305415
272	RPL22	Module2	0.301277
273	LAPTM5	Module2	0.299295
274	RPL7	Module2	0.298718
275	FOLR2	Module2	0.298278
276	GPR34	Module2	0.297449
277	OLFML3	Module2	0.297271
278	MPEG1	Module2	0.293987
279	RPL32	Module2	0.290893
280	MAF	Module2	0.290797
281	ACTG1	Module2	0.289794
282	CD52	Module2	0.289687
283	LOC716834	Module2	0.289126
284	GABARAP	Module2	0.286849
285	EEF1B2	Module2	0.286714
286	RNASE6	Module2	0.285135
287	RPL12	Module2	0.283927
288	EEF1G	Module2	0.282186
289	CTSS	Module2	0.281939
290	RARRES2	Module2	0.280612
291	EEF1A1	Module2	0.276163
292	ALOX5AP	Module2	0.273241
293	FCGR1A	Module2	0.271587
294	SERF2	Module2	0.27127
295	EIF1	Module2	0.271109
296	SELENOP	Module2	0.27013
297	GSTP1	Module2	0.269977
298	EIF3K	Module2	0.266559
299	FCGRT-1	Module2	0.266219
300	TMSB10	Module2	0.266179
301	CEBPB	Module2	0.264924
302	OAZ1	Module2	0.263361
303	BHLHE41	Module2	0.263203
304	UBB	Module2	0.26116
305	KCTD12	Module2	0.260079
306	LOC697476	Module2	0.25971
307	NPC2	Module2	0.258492
308	ATP5F1E	Module2	0.258056
309	ZFP36L2	Module2	0.258055
310	IFNGR1	Module2	0.257487
311	GMFG	Module2	0.257244
312	CX3CR1	Module2	0.256744
313	TMEM176B	Module2	0.256364
314	UBC	Module2	0.256358
315	TREML1	Module2	0.255199
316	GPX1	Module2	0.254831
317	ARL6IP5	Module2	0.252761
318	FTH1	Module2	0.252242
319	GRN	Module2	0.25135
320	CD48	Module2	0.24932
321	ARPC3	Module2	0.248163
322	C5AR1	Module2	0.247226
323	RPL4	Module2	0.246755
324	TMBIM6	Module2	0.246463
325	CCL4L1	Module2	0.243875
326	GAPDH	Module2	0.243436
327	LOC100430627	Module2	0.242389
328	PPT1	Module2	0.242365
329	LOC106998836	Module2	0.241105
330	PPIB	Module2	0.239991
331	PYCARD	Module2	0.239876
332	TREM2	Module2	0.239266
333	ITGB2	Module2	0.239156
334	LOC704104	Module2	0.238443
335	PFN1	Module2	0.237997
336	CTSB	Module2	0.237453
337	GABARAPL2	Module2	0.234658
338	YWHAH	Module2	0.230679
339	CD14	Module2	0.230604
340	P2RY13	Module2	0.2302
341	IGSF6	Module2	0.230013
342	SRP14	Module2	0.229861
343	IFI30	Module2	0.229522
344	SH3BGRL3	Module2	0.228394
345	CXCL16	Module2	0.228017
346	LOC718777	Module2	0.22753
347	CALR	Module2	0.226746
348	EMP3	Module2	0.226712
349	GNG5	Module2	0.226585
350	RPL36AL	Module2	0.222619
351	ARPC1B	Module2	0.2226
352	ATP6V0E1	Module2	0.222418
353	ATP6AP2	Module2	0.222344
354	ATP6V0B	Module2	0.221875
355	HSPA8	Module2	0.2207
356	PFDN5	Module2	0.219434
357	MYL6	Module2	0.218499
358	BRI3	Module2	0.218318
359	TUBA1B	Module2	0.217186
360	CD53	Module2	0.216971
361	PCYOX1	Module2	0.21652
362	LOC107000401	Module2	0.21601
363	RGS10	Module2	0.214909
364	ATP5MC2	Module2	0.214028
365	KRTCAP2	Module2	0.212237
366	S100A11	Module2	0.211673
367	MAMU-AG	Module2	0.211511
368	LOC695533	Module2	0.211243
369	ATP6V0C	Module2	0.210606
370	RNASEK	Module2	0.209221
371	LOC114674108	Module2	0.20807
372	MYDGF	Module2	0.207903
373	ADORA3	Module2	0.207751
374	TMEM59	Module2	0.207082
375	LAMP1	Module2	0.20569
376	PSENEN	Module2	0.205201
377	BST2	Module2	0.204922
378	CALM2	Module2	0.203028
379	CEBPD	Module2	0.202543
380	NINJ1	Module2	0.20178
381	LST1	Module2	0.201717
382	UQCR	Module2	0.199905
383	ATP5F1D	Module2	0.199842
384	TXNIP	Module2	0.199184
385	CD37	Module2	0.198112
386	CEBPA	Module2	0.19771
387	C3AR1	Module2	0.197601
388	COX6C	Module2	0.197377
389	ATP6AP1	Module2	0.196863
390	NDUFA4	Module2	0.196413
391	GATM	Module2	0.196404
392	SSR4	Module2	0.195637
393	MAN2B1	Module2	0.195096
394	RHOG	Module2	0.194847
395	NME2	Module2	0.194694
396	FCGR3	Module2	0.193941
397	HINT1	Module2	0.19279
398	UBL5	Module2	0.192757
399	CANX	Module2	0.192457
400	LAMTOR4	Module2	0.19245
401	HEXB	Module2	0.192277
402	TMEM176A	Module2	0.192145
403	PTMA	Module2	0.191864
404	RPS4Y1	Module2	0.191743
405	RPL29	Module2	0.191038
406	RPL39	Module2	0.190171
407	TSPO	Module2	0.189612
408	LOC696956	Module2	0.187664
409	NDUFA1	Module2	0.186606
410	HSP90B1	Module2	0.186507
411	NUPR1	Module2	0.184651
412	MAGED2	Module2	0.184591
413	RPL14	Module2	0.184122
414	WDR83OS	Module2	0.183338
415	ATP5MG	Module2	0.182803
416	RAMP1	Module2	0.181346
417	INKA1	Module2	0.180916
418	LOC701504	Module2	0.180608
419	VDAC1	Module2	0.179968
420	DDOST	Module2	0.178515
421	NDUFA13	Module2	0.178383
422	FKBP2	Module2	0.178234
423	MYL12B	Module2	0.176946
424	CSTB	Module2	0.176833
425	VSIG4	Module2	0.176172
426	LAPTM4A	Module2	0.175802
427	ENO1	Module2	0.17548
428	COX8A	Module2	0.175054
429	NDUFB9	Module2	0.174921
430	OST4	Module2	0.174846
431	LOC114669847	Module2	0.174777
432	CHCHD10	Module2	0.17473
433	EID1	Module2	0.174431
434	SSR2	Module2	0.174097
435	TPP1	Module2	0.173847
436	HMGB1	Module2	0.173148
437	TUBB	Module2	0.172903
438	SAT1	Module2	0.172878
439	ASAH1	Module2	0.172689
440	MRFAP1	Module2	0.171691
441	FIS1	Module2	0.171379
442	BTF3	Module2	0.171283
443	YWHAB	Module2	0.171119
444	CLTA	Module2	0.169729
445	LOC720636	Module2	0.16933
446	TMA7	Module2	0.169289
447	SERPINF1	Module2	0.169252
448	UPK3A	Module2	0.168331
449	SPCS2	Module2	0.168305
450	SLIRP	Module2	0.16809
451	ATP5MF	Module2	0.167147
452	RPL31	Module2	0.166539
453	SMDT1	Module2	0.166249
454	NDUFC2	Module2	0.166155
455	RPL22L1	Module2	0.16579
456	ACTB	Module2	0.165316
457	EVI2A	Module2	0.165287
458	NDUFA2	Module2	0.164709
459	LOC100426537	Module2	0.164657
460	SYPL1	Module2	0.164596
461	PTAFR	Module2	0.164233
462	CCR1	Module2	0.164161
463	GNAI2	Module2	0.163896
464	PTTG1IP	Module2	0.163752
465	C5H4orf3	Module2	0.163039
466	BCAP31	Module2	0.162923
467	SEC62	Module2	0.162679
468	EEF1D	Module2	0.162607
469	NFKBIA	Module2	0.162344
470	LOC716530	Module2	0.162161
471	LOC707227	Module2	0.162105
472	TMED9	Module2	0.161553
473	ATF4	Module2	0.161264
474	CORO1A	Module2	0.161229
475	HNRNPDL	Module2	0.160989
476	PSMA7	Module2	0.160953
477	TNFSF13	Module2	0.160385
478	PET100	Module2	0.160154
479	COPS9	Module2	0.159759
480	LOC106996627	Module2	0.159706
481	ATP5MPL	Module2	0.159182
482	POLD4	Module2	0.158895
483	FUCA1	Module2	0.158885
484	CTSH	Module2	0.158709
485	KRT10	Module2	0.158569
486	CTSA	Module2	0.157958
487	NME3	Module2	0.157852
488	SELENOF	Module2	0.157134
489	HNRNPA1	Module2	0.156872
490	MDH1	Module2	0.156727
491	ATP5F1A	Module2	0.156464
492	ATP5IF1	Module2	0.156325
493	ATP5ME	Module2	0.156262
494	CD68	Module2	0.155969
495	COX6B1	Module2	0.155878
496	CTSZ	Module2	0.155807
497	RABAC1	Module2	0.155749
498	LOC702847	Module2	0.155713
499	MYL12A	Module2	0.155416
500	COMMD6	Module2	0.155164
501	GPAA1	Module2	0.154664
502	RAC1	Module2	0.154663
503	MGST2	Module2	0.154636
504	C6H5orf15	Module2	0.154405
505	TRMT112	Module2	0.154365
506	TLR9	Module2	0.154308
507	CAP1	Module2	0.154121
508	BRK1	Module2	0.153075
509	RASL10A	Module2	0.152725
510	CYC1	Module2	0.152645
511	H2AFZ	Module2	0.152436
512	NDUFB10	Module2	0.15231
513	ELOB	Module2	0.152241
514	NOP53	Module2	0.152167
515	LOC106995967	Module2	0.152136
516	LOC701223	Module2	0.151925
517	ALDOA	Module2	0.151783
518	CALM1	Module2	0.151742
519	TPI1	Module2	0.150952
520	UQCRQ	Module2	0.150902
521	SLC25A3	Module2	0.15074
522	EIF3F	Module2	0.150478
523	EDF1	Module2	0.150353
524	HNRNPK	Module2	0.150316
525	COX7B	Module2	0.14997
526	NDUFB1	Module2	0.149773
527	HCST	Module2	0.149712
528	H1FX	Module2	0.148498
529	SIGLEC14	Module2	0.148254
530	PCBP1	Module2	0.148068
531	ATP5PO	Module2	0.146883
532	SLC25A5	Module2	0.146846
533	TOMM20	Module2	0.146524
534	RGS18	Module2	0.146343
535	SEC61B	Module2	0.146194
536	NDUFB4	Module2	0.146001
537	PSMB6	Module2	0.145977
538	ERP29	Module2	0.145758
539	COPE	Module2	0.145237
540	MANF	Module2	0.144962
541	NDUFS7	Module2	0.144809
542	REX1BD	Module2	0.144606
543	IFI6	Module2	0.144112
544	C11H12orf57	Module2	0.144044
545	TLR1	Module2	0.143572
546	MGST3	Module2	0.143563
547	ITGB1	Module2	0.14356
548	PSMB1	Module2	0.14315
549	RGS19	Module2	0.14286
550	TMBIM4	Module2	0.142644
551	CARD16	Module2	0.142616
552	SLC25A4	Module2	0.142392
553	DBI	Module2	0.142374
554	CHRNA1	Module2	0.142363
555	LGMN	Module2	0.141585
556	SRSF2	Module2	0.141552
557	MT2A	Module2	0.141375
558	NDUFA11	Module2	0.141239
559	PABPC1	Module2	0.141196
560	SCAMP2	Module2	0.140728
561	VAMP8	Module2	0.140725
562	SON	Module2	0.14038
563	CIRBP	Module2	0.140091
564	ARL6IP1	Module2	0.139735
565	GIMAP1	Module2	0.139661
566	TAF10	Module2	0.139542
567	MRPL41	Module2	0.139298
568	RPN2	Module2	0.139295
569	PSME1	Module2	0.139233
570	IRF8	Module2	0.139079
571	PRDX1	Module2	0.139007
572	TMEM147	Module2	0.138973
573	SLC3A2	Module2	0.138967
574	RPL37A	Module2	0.138936
575	COX17	Module2	0.138833
576	DERL3	Module2	0.138256
577	SVBP	Module2	0.13823
578	MRPS23	Module2	0.138206
579	LMAN2	Module2	0.138039
580	PTGDR2	Module2	0.137769
581	PARK7	Module2	0.137745
582	PDIA3	Module2	0.137734
583	LOC706608	Module2	0.137553
584	SLC16A8	Module2	0.137209
585	SPCS1	Module2	0.137182
586	SELENOS	Module2	0.137117
587	MAMU-A3	Module2	0.136896
588	RHOA	Module2	0.136824
589	NDUFB7	Module2	0.136813
590	BAIAP2L2	Module2	0.136047
591	ATP5F1B	Module2	0.135921
592	SDF2L1	Module2	0.13592
593	LOC107000809	Module2	0.135908
594	SET	Module2	0.13587
595	CCDC85B	Module2	0.135822
596	LIPA	Module2	0.135818
597	SELENOW	Module2	0.135365
598	NEDD8	Module2	0.135095
599	LOC694289	Module2	0.135067
600	GNB2	Module2	0.13483
601	NDUFA3	Module2	0.134633
602	LOC706177	Module2	0.13457
603	DYNLL1	Module2	0.13438
604	RPN1	Module2	0.134347
605	BSG	Module2	0.134251
606	ATOX1	Module2	0.134239
607	HMOX1	Module2	0.134173
608	UQCRH	Module2	0.13387
609	RPS19BP1	Module2	0.13381
610	CNBP	Module2	0.133703
611	NDUFC1	Module2	0.1332
612	CAPG	Module2	0.133161
613	NSA2	Module2	0.132898
614	TNFAIP8L2	Module2	0.132878
615	MICOS10	Module2	0.132646
616	LOC106996934	Module2	0.132465
617	LILRB1	Module2	0.132197
618	SLC39A1	Module2	0.131826
619	RER1	Module2	0.131698
620	GPSM3	Module2	0.131623
621	LOC717879	Module2	0.13114
622	SPCS3	Module2	0.130676
623	BANF1	Module2	0.130632
624	ROMO1	Module2	0.130613
625	TMEM109	Module2	0.130602
626	PSMB4	Module2	0.130584
627	SF3B5	Module2	0.130183
628	SERP1	Module2	0.129786
629	TMEM160	Module2	0.129638
630	SUB1	Module2	0.129612
631	NDUFB8	Module2	0.129464
632	DAD1	Module2	0.129449
633	POMP	Module2	0.129271
634	POLR2L	Module2	0.129268
635	IFI27L2	Module2	0.12891
636	SRI	Module2	0.128753
637	RBM3	Module2	0.128745
638	HSBP1	Module2	0.128682
639	COX5A	Module2	0.128289
640	TALDO1	Module2	0.128227
641	ATP5PF	Module2	0.127861
642	LYL1	Module2	0.127502
643	PPP1CA	Module2	0.127456
644	SEM1	Module2	0.12717
645	ARPC5	Module2	0.127084
646	ARL6IP4	Module2	0.12664
647	IRF2BP2	Module2	0.126567
648	RNF181	Module2	0.126557
649	ATP5MC3	Module2	0.125855
650	PDIA4	Module2	0.125724
651	SNRPB	Module2	0.125466
652	CKLF	Module2	0.125369
653	PSMA2	Module2	0.125268
654	AP2M1	Module2	0.124929
655	MRPL23	Module2	0.12485
656	NDUFB2	Module2	0.124838
657	SCAND1	Module2	0.124536
658	CHMP2A	Module2	0.12439
659	PRR13	Module2	0.124377
660	PPP1R14B	Module2	0.124193
661	LOC702712	Module2	0.124118
662	ATRAID	Module2	0.123823
663	NDUFB11	Module2	0.123795
664	EMILIN1	Module2	0.123659
665	COX7AH	Module2	0.123477
666	TMEM14C	Module2	0.123279
667	LOC708096	Module2	0.123139
668	NDUFA7	Module2	0.122984
669	LYVE1	Module2	0.122868
670	LOC700087	Module2	0.122778
671	NAA20	Module2	0.122762
672	TMEM258	Module2	0.122745
673	LOC107000533	Module2	0.122454
674	MT1M	Module2	0.122164
675	EIF4A1	Module2	0.121953
676	MT1E	Module2	0.121898
677	C1QBP	Module2	0.121791
678	SYNGR2	Module2	0.121509
679	LOC114669724	Module2	0.121091
680	LAMTOR2	Module2	0.120941
681	MRPL53	Module2	0.120789
682	LOC106996680	Module2	0.120774
683	DDT	Module2	0.120728
684	SNRPE	Module2	0.120583
685	RNASEH2C	Module2	0.120416
686	ANAPC11	Module2	0.120394
687	PRDX5	Module2	0.120384
688	TRIR	Module2	0.120299
689	NUDT8	Module2	0.120148
690	ARPC4	Module2	0.120134
691	ALKBH7	Module2	0.120083
692	C19H19orf24	Module2	0.120075
693	AKR1B1	Module2	0.12001
694	C19H19orf53	Module2	0.119771
695	MBOAT7	Module2	0.119682
696	KDELR1	Module2	0.119617
697	TMEM219	Module2	0.119609
698	POLR2J	Module2	0.119557
699	TRAPPC5	Module2	0.119384
700	TMEM35B	Module2	0.119379
701	RBX1	Module2	0.11932
702	AKR7A2	Module2	0.119207
703	TOMM6	Module2	0.119194
704	NDUFB6	Module2	0.119097
705	FPR1	Module2	0.119063
706	SNRPD3	Module2	0.118937
707	NOP10	Module2	0.118594
708	RGS2	Module2	0.118521
709	LOC714576	Module2	0.118298
710	MIF	Module2	0.118234
711	H2AFJ	Module2	0.11821
712	SUMO2	Module2	0.118138
713	PRELID1	Module2	0.117996
714	SAP18	Module2	0.117947
715	LGALS3BP	Module2	0.11788
716	LAGE3	Module2	0.117833
717	LRP10	Module2	0.11779
718	ARL4C	Module2	0.117784
719	CD302	Module2	0.117608
720	MAGEH1	Module2	0.117485
721	LRPAP1	Module2	0.117466
722	TMEM14B	Module2	0.117254
723	ATP5PD	Module2	0.117253
724	LOC696959	Module2	0.116914
725	TMEM50A	Module2	0.115625
726	PRNP	Module2	0.11539
727	EIF3G	Module2	0.115379
728	HHEX	Module2	0.115201
729	TMEM158	Module2	0.115106
730	PFDN2	Module2	0.114731
731	ZNHIT1	Module2	0.114532
732	TCIRG1	Module2	0.114307
733	MRPS26	Module2	0.114231
734	CWC15	Module2	0.114211
735	CTBS	Module2	0.114173
736	TIMD4	Module2	0.114165
737	CLK1	Module2	0.114147
738	HMGN1	Module2	0.11386
739	DCTN3	Module2	0.113704
740	CNFN	Module2	0.113504
741	MRPL17	Module2	0.113458
742	SMIM26	Module2	0.113269
743	SMPD1	Module2	0.113243
744	FUOM	Module2	0.113177
745	TMED2	Module2	0.113137
746	MRPL34	Module2	0.112982
747	MRPL51	Module2	0.112822
748	CBX3	Module2	0.112809
749	TMEM205	Module2	0.112751
750	ATP5MC1	Module2	0.112657
751	BUD23	Module2	0.112605
752	SERPING1	Module2	0.112584
753	DPM3	Module2	0.112352
754	PGRMC1	Module2	0.112032
755	HYPK	Module2	0.112019
756	CCDC107	Module2	0.111901
757	ARF5	Module2	0.111723
758	TNFSF12	Module2	0.111617
759	CUTA	Module2	0.111414
760	EIF1B	Module2	0.111244
761	ARF1	Module2	0.111221
762	DRAP1	Module2	0.111159
763	JTB	Module2	0.110839
764	LOC704147	Module2	0.11083
765	EIF3D	Module2	0.11065
766	PRDX4	Module2	0.110481
767	SRP9	Module2	0.110439
768	C18H18orf32	Module2	0.110403
769	RTRAF	Module2	0.110263
770	CTSL	Module2	0.110209
771	PFDN6	Module2	0.110209
772	MZT2B	Module2	0.11009
773	LOC114669852	Module2	0.110078
774	DSTN	Module2	0.110063
775	PSMB5	Module2	0.109939
776	PSMA4	Module2	0.109796
777	CIAO2B	Module2	0.10967
778	PLAAT3	Module2	0.10965
779	SNRPB2	Module2	0.109584
780	RAN	Module2	0.109467
781	LOC705636	Module2	0.109008
782	LSM8	Module2	0.10886
783	LOC712324	Module2	0.108665
784	TMEM9B	Module2	0.108528
785	CD59	Module2	0.108471
786	TEX264	Module2	0.108185
787	AIP	Module2	0.107995
788	YIPF3	Module2	0.107612
789	ETFB	Module2	0.107593
790	DDIT4	Module2	0.107566
791	C10H20orf27	Module2	0.107461
792	TUFM	Module2	0.107237
793	CDC42	Module2	0.107228
794	ERGIC3	Module2	0.107218
795	EIF6	Module2	0.107133
796	HSPE1	Module2	0.107082
797	EIF2S2	Module2	0.106998
798	NDUFS6	Module2	0.106913
799	TRAPPC1	Module2	0.106897
800	P2RY11	Module2	0.106886
801	EMC6	Module2	0.106601
802	ZDHHC12	Module2	0.106219
803	EIF5A	Module2	0.105909
804	DOK1	Module2	0.10571
805	NDUFAB1	Module2	0.105657
806	LIMD2	Module2	0.10523
807	NHP2	Module2	0.105099
808	LOC696998	Module2	0.104755
809	NAA38	Module2	0.104496
810	PPIA	Module2	0.104443
811	DYNLRB1	Module2	0.104198
812	CHCHD1	Module2	0.104099
813	HNRNPA0	Module2	0.104035
814	CSNK2B	Module2	0.103754
815	ARL5A	Module2	0.1037
816	LSM7	Module2	0.103655
817	DAZAP2	Module2	0.103637
818	UQCRC1	Module2	0.103632
819	LSM4	Module2	0.103451
820	RAB11A	Module2	0.10299
821	RPS27L	Module2	0.102966
822	SEC61G	Module2	0.102915
823	ARF6	Module2	0.10268
824	LOC699655	Module2	0.102665
825	COPRS	Module2	0.102647
826	VMA21	Module2	0.102225
827	IMP3	Module2	0.102217
828	G6PC3	Module2	0.102158
829	NDUFAF3	Module2	0.101574
830	STOM	Module2	0.101486
831	LOC704341	Module2	0.101337
832	TXNDC17	Module2	0.101324
833	PGLS	Module2	0.101315
834	PGK1	Module2	0.101186
835	SUPT4H1	Module2	0.0999688
836	TMEM179B	Module2	0.0998611
837	FAM173A	Module2	0.0997941
838	NCBP2	Module2	0.0997431
839	NDUFAF8	Module2	0.0996862
840	HAMP	Module2	0.099462
841	ATP5MD	Module2	0.0993073
842	LSM10	Module2	0.0993065
843	PSMD8	Module2	0.0990445
844	C10H20orf24	Module2	0.0990184
845	VCP	Module2	0.0987655
846	NDUFS8	Module2	0.0987371
847	SEC11C	Module2	0.0986918
848	LOC719667	Module2	0.098685
849	OSTC	Module2	0.098634
850	GTF2H5	Module2	0.0985705
851	SNRPD1	Module2	0.0982253
852	EIF1AX	Module2	0.0981054
853	POLR2F	Module2	0.0980422
854	ZNF706	Module2	0.0979623
855	APRT	Module2	0.0978107
856	MRPL27	Module2	0.0975051
857	CISD3	Module2	0.097249
858	TIMM10B	Module2	0.097204
859	COX14	Module2	0.0963764
860	RBM8A	Module2	0.0962759
861	MAFB	Module2	0.0962373
862	DEGS1	Module2	0.0959374
863	SSBP1	Module2	0.0959364
864	ISCU	Module2	0.0958623
865	NT5C	Module2	0.095706
866	CIAO2A	Module2	0.0954121
867	IRF2BPL	Module2	0.0952801
868	PTPMT1	Module2	0.0950232
869	NDUFB5	Module2	0.0948768
870	NFE2L2	Module2	0.0948468
871	SEPHS2	Module2	0.0947696
872	SYF2	Module2	0.0947565
873	AP2S1	Module2	0.0945965
874	CCNI	Module2	0.0945817
875	C1H1orf122	Module2	0.0943066
876	RBIS	Module2	0.0941869
877	GSTO1	Module2	0.0940041
878	LOC698851	Module2	0.0937711
879	MAP3K8	Module2	0.0933882
880	LENG1	Module2	0.0923181
881	ORAI1	Module2	0.0920155
882	SLC38A2	Module2	0.0918484
883	AMD1	Module2	0.0915234
884	UBALD2	Module2	0.0914337
885	DNAJC19	Module2	0.0909931
886	MAF1	Module2	0.090075
887	TMEM99	Module2	0.0897751
888	SNRPG	Module2	0.0897181
889	GIMAP7	Module2	0.0895594
890	MRPL57	Module2	0.0895094
891	TRAPPC4	Module2	0.0889205
892	CCDC152	Module2	0.0887553
893	PRMT1	Module2	0.0886759
894	TMEM60	Module2	0.0885236
895	LAMTOR1	Module2	0.088109
896	PPP1R35	Module2	0.0878469
897	SNU13	Module2	0.0874217
898	LOC106994091	Module2	0.0872347
899	JAGN1	Module2	0.0872062
900	NDUFS3	Module2	0.0871648
901	ARL2	Module2	0.087146
902	TAGLN2	Module2	0.0865819
903	LOC722780	Module2	0.0863015
904	IER5L	Module2	0.0860616
905	SELENOK	Module2	0.0860523
906	CH25H	Module2	0.0860013
907	ID2	Module2	0.085985
908	BAX	Module2	0.0854215
909	DCXR	Module2	0.0853787
910	SHISA5	Module2	0.0853018
911	UCKL1	Module2	0.085223
912	SF3B6	Module2	0.0850288
913	FRG1	Module2	0.0848654
914	LOC114672574	Module2	0.0845205
915	CEACAM3	Module2	0.0844561
916	NUDT16L1	Module2	0.0835473
917	NUDT22	Module2	0.0832667
918	ADRA2C	Module2	0.0827522
919	C7H14orf119	Module2	0.08236
920	MRPL38	Module2	0.0818557
921	POLR2K	Module2	0.0815025
922	TAGAP	Module2	0.0814744
923	SNRPD2	Module2	0.081151
924	LOC106998533	Module2	0.0799848
925	GPBAR1	Module2	0.0798555
926	RPA3	Module2	0.0796352
927	LOC114678346	Module2	0.0794452
928	PGP	Module2	0.0792206
929	TMEM128	Module2	0.079138
930	FRG1-1	Module2	0.0782469
931	PHF5A	Module2	0.0774932
932	TBCC	Module2	0.0768531
933	TUBB4B	Module2	0.0757339
934	NDUFA6	Module2	0.075398
935	OARD1	Module2	0.0737214
936	LOC114671717	Module2	0.0730229
937	NECAP1	Module2	0.0721037
938	MRPS18C	Module2	0.0716117
939	LOC106997895	Module2	0.0708336
940	ZNRD1	Module2	0.0705954
941	DYNLT1	Module2	0.0703389
942	GTF2IRD1-1	Module2	0.0682751
943	RABEPK	Module2	0.0678023
944	LAMP3	Module2	0.067544
945	ATP6V0D1	Module2	0.0666184
946	LOC114671242	Module2	0.0653545
947	NFKBIB	Module2	0.0565339
948	KIRREL3	Module2	0.0516455
949	LOC114671625	Module2	0.0491445
950	LOC100426887	Module2	0.0480529
951	LOC114680580	Module2	0.0376886
952	DOHH	Module2	0.0252879
953	SOX6	Module2	0.000491124
954	PLXDC2	Module3	0.650965
955	ST6GALNAC3	Module3	0.624235
956	SORL1	Module3	0.559843
957	AUTS2	Module3	0.559746
958	FRMD4A	Module3	0.543698
959	KCNQ3	Module3	0.527345
960	NAV3	Module3	0.52533
961	DNM3	Module3	0.506175
962	CC2D2B	Module3	0.504925
963	MEF2A	Module3	0.498348
964	SLC9A9	Module3	0.485426
965	SRGAP2	Module3	0.482497
966	NCKAP5	Module3	0.481652
967	FCHSD2	Module3	0.471104
968	SIPA1L2	Module3	0.433032
969	FAM149A	Module3	0.425953
970	TLN2	Module3	0.420129
971	ABCC4	Module3	0.41841
972	MERTK	Module3	0.416489
973	DOCK10	Module3	0.399944
974	ITPR2	Module3	0.397116
975	LRCH1	Module3	0.395098
976	TMCC3	Module3	0.389489
977	PTPRM	Module3	0.387243
978	SFMBT2	Module3	0.385835
979	EIF4G3	Module3	0.384059
980	SCML4	Module3	0.383375
981	CHD7	Module3	0.382291
982	PLD1	Module3	0.377741
983	RTTN	Module3	0.374405
984	DIP2B	Module3	0.373072
985	ATP2C1	Module3	0.365395
986	INPP4B	Module3	0.357804
987	ATP8B4	Module3	0.35426
988	FOXN3	Module3	0.346741
989	TANC1	Module3	0.34566
990	ASTN1	Module3	0.342055
991	CHST11	Module3	0.338011
992	CHKA	Module3	0.335272
993	MVB12B	Module3	0.333725
994	ITGB5	Module3	0.329309
995	SLC4A7	Module3	0.32675
996	SSH2	Module3	0.32472
997	LOC106999008	Module3	0.32366
998	LRMDA	Module3	0.315667
999	SH3KBP1	Module3	0.310511
1000	PGM5	Module3	0.309721
1001	ESRRG	Module3	0.304932
1002	DEPTOR	Module3	0.300834
1003	LPIN2	Module3	0.299185
1004	SETBP1	Module3	0.298378
1005	TBC1D4	Module3	0.291144
1006	ANKS1A	Module3	0.275818
1007	TTC28	Module3	0.254081
1008	SNX29	Module4	0.351703
1009	INPP5D	Module4	0.323772
1010	PLCG2	Module4	0.322268
1011	PALD1	Module4	0.321502
1012	SH3RF3	Module4	0.31916
1013	CAMK1D	Module4	0.312659
1014	ABR	Module4	0.307106
1015	PREX1	Module4	0.306553
1016	ARHGAP22	Module4	0.306051
1017	LDLRAD4	Module4	0.306042
1018	RASGEF1C	Module4	0.285014
1019	CMIP	Module4	0.283386
1020	ASTN2	Module4	0.273632
1021	PACSIN2	Module4	0.267276
1022	TBC1D22A	Module4	0.267023
1023	FMNL3	Module4	0.265105
1024	ZFHX3	Module4	0.262107
1025	CAPZB	Module4	0.260985
1026	ARRB1	Module4	0.254521
1027	TNS3	Module4	0.253226
1028	ANKRD11	Module4	0.251471
1029	MACF1	Module4	0.251354
1030	VPS13C	Module4	0.243449
1031	VWF	Module4	0.242465
1032	TOP1MT	Module4	0.242108
1033	GNG7	Module4	0.241741
1034	ASH1L	Module4	0.241675
1035	AP1B1	Module4	0.240408
1036	CYFIP1	Module4	0.240119
1037	HIVEP3	Module4	0.238441
1038	GNB1	Module4	0.237718
1039	FLI1	Module4	0.236995
1040	LCP2	Module4	0.236833
1041	PTPRJ	Module4	0.235714
1042	MCF2L	Module4	0.233576
1043	RNF130	Module4	0.232214
1044	ST6GAL1	Module4	0.231386
1045	KDM2A	Module4	0.230727
1046	KCNQ1	Module4	0.230381
1047	TNRC18	Module4	0.228406
1048	TSPAN14	Module4	0.227426
1049	RAPGEF1	Module4	0.227132
1050	ZNF710	Module4	0.226912
1051	PBRM1	Module4	0.224462
1052	IKBKB	Module4	0.223832
1053	PRKAG2	Module4	0.222173
1054	NKTR	Module4	0.221002
1055	KIAA1109	Module4	0.220429
1056	PPARD	Module4	0.219407
1057	DNM2	Module4	0.219017
1058	PIK3R5	Module4	0.217222
1059	CUX1	Module4	0.21617
1060	DOCK11	Module4	0.214956
1061	DENND3	Module4	0.214513
1062	COMMD10	Module4	0.213355
1063	INPP4A	Module4	0.213351
1064	LRRK1	Module4	0.211199
1065	AIM2	Module4	0.210321
1066	DIP2A	Module4	0.209644
1067	LOC718454	Module4	0.209595
1068	LOXHD1	Module4	0.209311
1069	TBC1D14	Module4	0.2093
1070	MINK1	Module4	0.209068
1071	CTBP2	Module4	0.207843
1072	HDAC8	Module4	0.206603
1073	SUSD4	Module4	0.206523
1074	PLCB2	Module4	0.205902
1075	MYO9B	Module4	0.205182
1076	FGFR1	Module4	0.203913
1077	ITSN2	Module4	0.203828
1078	SRRM2	Module4	0.203077
1079	EPSTI1	Module4	0.202567
1080	FAM53B	Module4	0.202503
1081	GIT2	Module4	0.200337
1082	KDM7A	Module4	0.199847
1083	AOAH	Module4	0.19897
1084	APPL2	Module4	0.19861
1085	SKI	Module4	0.198499
1086	AOPEP	Module4	0.19846
1087	BIN2	Module4	0.19844
1088	SP110	Module4	0.198371
1089	JAK2	Module4	0.198243
1090	DNMT3A	Module4	0.198156
1091	VAV1	Module4	0.197626
1092	SCAPER	Module4	0.196829
1093	CDC42BPB	Module4	0.196311
1094	PITPNA	Module4	0.195868
1095	ZZEF1	Module4	0.195367
1096	LOC114674534	Module4	0.195276
1097	EHMT1	Module4	0.195199
1098	SPNS2	Module4	0.194871
1099	BPTF	Module4	0.193667
1100	MYO1F	Module4	0.193468
1101	STK10	Module4	0.192025
1102	OGT	Module4	0.190573
1103	NCKAP1L	Module4	0.190573
1104	PIK3CD	Module4	0.189723
1105	TRPC4AP	Module4	0.18875
1106	TBXAS1	Module4	0.18824
1107	SENP5	Module4	0.188074
1108	R3HDM2	Module4	0.187244
1109	RASA3	Module4	0.18716
1110	MYH9	Module4	0.185947
1111	CABLES1	Module4	0.185278
1112	NEK6	Module4	0.184995
1113	FAM193A	Module4	0.184147
1114	ALPK1	Module4	0.183686
1115	CNTRL	Module4	0.183005
1116	ATRX	Module4	0.182563
1117	RBM6	Module4	0.181924
1118	CACNA1A	Module4	0.181615
1119	GRAMD1B	Module4	0.181335
1120	NCOR1	Module4	0.181145
1121	ARHGAP17	Module4	0.180648
1122	NCOR2	Module4	0.180211
1123	WDPCP	Module4	0.180113
1124	DDX17	Module4	0.180061
1125	HERC3	Module4	0.179999
1126	SETX	Module4	0.178416
1127	GOLGA4	Module4	0.177443
1128	PFKFB3	Module4	0.177371
1129	KAT6A	Module4	0.175473
1130	CHD9	Module4	0.175372
1131	FAM120B	Module4	0.174768
1132	LOC712294	Module4	0.174293
1133	DHRSX	Module4	0.174204
1134	SP100	Module4	0.174074
1135	SH2B3	Module4	0.173931
1136	SOGA1	Module4	0.173721
1137	HK2	Module4	0.173468
1138	CUX2	Module4	0.172782
1139	NIN	Module4	0.172361
1140	SFPQ	Module4	0.172341
1141	ITGAM	Module4	0.172109
1142	SCARB1	Module4	0.170783
1143	SLC6A6	Module4	0.170718
1144	PER3	Module4	0.17037
1145	B3GLCT	Module4	0.170314
1146	CLSTN1	Module4	0.170095
1147	RBM25	Module4	0.170044
1148	MYO18A	Module4	0.169871
1149	SMC5	Module4	0.169864
1150	FKBP15	Module4	0.169196
1151	RPTOR	Module4	0.169061
1152	ROR2	Module4	0.169023
1153	BRD4	Module4	0.168179
1154	TPCN1	Module4	0.167291
1155	CCM2	Module4	0.166938
1156	NOL4L	Module4	0.166927
1157	LRP1	Module4	0.166616
1158	KIAA1328	Module4	0.166326
1159	FUS	Module4	0.165831
1160	TTC14	Module4	0.165191
1161	ATP11A	Module4	0.164656
1162	PPP6R2	Module4	0.1643
1163	SMG1	Module4	0.164241
1164	GSAP	Module4	0.162673
1165	PRRC2B	Module4	0.162369
1166	LOC698045	Module4	0.162143
1167	VPS39	Module4	0.162085
1168	NFIC	Module4	0.162014
1169	RAB11FIP5	Module4	0.161993
1170	SSBP3	Module4	0.161792
1171	ANKRD12	Module4	0.16172
1172	DDX60L	Module4	0.161546
1173	ADAP2	Module4	0.16085
1174	SFSWAP	Module4	0.160676
1175	CARD11	Module4	0.159896
1176	RBM5	Module4	0.15922
1177	LOC709175	Module4	0.158948
1178	HNRNPH1	Module4	0.158643
1179	RABEP1	Module4	0.15849
1180	PRR14L	Module4	0.158227
1181	RRBP1	Module4	0.157444
1182	SPEN	Module4	0.157248
1183	BDP1	Module4	0.15717
1184	ADCY7	Module4	0.157065
1185	GATAD1	Module4	0.156883
1186	MTMR14	Module4	0.156701
1187	C4H6orf62	Module4	0.156429
1188	SLC2A5	Module4	0.156351
1189	SPG11	Module4	0.156232
1190	NAIP	Module4	0.156071
1191	TRPM2	Module4	0.155495
1192	RGS12	Module4	0.154753
1193	ATRN	Module4	0.154612
1194	SLC43A2	Module4	0.154546
1195	PARP14	Module4	0.15301
1196	CYSLTR1	Module4	0.152918
1197	NEMF	Module4	0.15243
1198	PRRC2C	Module4	0.152424
1199	SPNS3	Module4	0.152401
1200	STX8	Module4	0.152114
1201	HIBCH	Module4	0.151515
1202	TRAPPC9	Module4	0.150637
1203	SIRPA	Module4	0.150415
1204	EPS15L1	Module4	0.150257
1205	GAK	Module4	0.149997
1206	CASC4	Module4	0.149649
1207	TEP1	Module4	0.148932
1208	KMT2A	Module4	0.148755
1209	ANKFY1	Module4	0.148491
1210	USP48	Module4	0.148431
1211	BCL2L1	Module4	0.148118
1212	TGFB1	Module4	0.147869
1213	TCERG1	Module4	0.147768
1214	BOD1L1	Module4	0.147527
1215	FANCC	Module4	0.147158
1216	CCND3	Module4	0.146855
1217	FMNL1	Module4	0.146464
1218	MAPK14	Module4	0.146093
1219	BAZ1B	Module4	0.146071
1220	CRYBG3	Module4	0.145408
1221	ZFC3H1	Module4	0.14509
1222	PTPRE	Module4	0.145052
1223	EWSR1	Module4	0.144959
1224	LOC719341	Module4	0.144656
1225	GBF1	Module4	0.144606
1226	BTAF1	Module4	0.144604
1227	ARGLU1	Module4	0.144583
1228	CPLANE1	Module4	0.144348
1229	STIMATE	Module4	0.14351
1230	TRRAP	Module4	0.142726
1231	TNK2	Module4	0.142657
1232	MARK2	Module4	0.142652
1233	KLC1	Module4	0.142602
1234	EIPR1	Module4	0.142479
1235	ERCC6L2	Module4	0.142207
1236	AKNA	Module4	0.142129
1237	KDM3B	Module4	0.141812
1238	MBTPS1	Module4	0.141339
1239	CCDC7	Module4	0.141329
1240	AXL	Module4	0.140777
1241	ITPK1	Module4	0.140339
1242	OGA	Module4	0.140052
1243	HTT	Module4	0.139994
1244	NMD3	Module4	0.139568
1245	CEP192	Module4	0.139554
1246	SIPA1L3	Module4	0.139549
1247	DGCR2	Module4	0.139186
1248	CCAR1	Module4	0.138564
1249	CAMSAP1	Module4	0.138171
1250	ZMYND8	Module4	0.138108
1251	LOC703641	Module4	0.137849
1252	MBP	Module4	0.137201
1253	TUBGCP3	Module4	0.137134
1254	LOC106998259	Module4	0.137132
1255	GANC	Module4	0.137056
1256	MRC2	Module4	0.13686
1257	CD276	Module4	0.136625
1258	THOC2	Module4	0.136252
1259	MLXIP	Module4	0.136143
1260	EP400	Module4	0.135488
1261	SEC63	Module4	0.135482
1262	PNISR	Module4	0.135463
1263	WWP2	Module4	0.135041
1264	MTMR1	Module4	0.135026
1265	STAU1	Module4	0.135
1266	PANX1	Module4	0.134792
1267	DYNC1H1	Module4	0.134653
1268	FNBP4	Module4	0.134418
1269	DPY19L3	Module4	0.134347
1270	LMF1	Module4	0.134256
1271	CHD8	Module4	0.134185
1272	ERICH1	Module4	0.13382
1273	LOC720035	Module4	0.133643
1274	PI4KA	Module4	0.133546
1275	XYLT1	Module4	0.133491
1276	PAXBP1	Module4	0.133333
1277	TLE3	Module4	0.133239
1278	RNF213	Module4	0.133155
1279	ARFGEF2	Module4	0.133105
1280	ELMSAN1	Module4	0.133046
1281	RILPL1	Module4	0.132614
1282	MAP3K14	Module4	0.132403
1283	PNPLA7	Module4	0.132335
1284	RAP1GAP2	Module4	0.132309
1285	RNF169	Module4	0.132023
1286	LOC106998034	Module4	0.131769
1287	SLC2A11	Module4	0.131754
1288	LOC722294	Module4	0.131373
1289	LOC719082	Module4	0.131248
1290	SH3GL1	Module4	0.13064
1291	PQLC1	Module4	0.130577
1292	EXOC1	Module4	0.129726
1293	TBC1D16	Module4	0.129654
1294	FOXK2	Module4	0.129504
1295	PPFIA1	Module4	0.128985
1296	GATAD2A	Module4	0.128941
1297	ABCA3	Module4	0.128906
1298	MYO1D	Module4	0.128432
1299	SLC35E2B	Module4	0.128273
1300	FGD3	Module4	0.128036
1301	TTC3	Module4	0.12792
1302	CTCF	Module4	0.127738
1303	TTC37	Module4	0.127567
1304	TAL1	Module4	0.127482
1305	DDX42	Module4	0.127458
1306	USP8	Module4	0.127445
1307	LOXL3	Module4	0.126922
1308	PCNT	Module4	0.126643
1309	RB1CC1	Module4	0.125969
1310	LOC106994956	Module4	0.125805
1311	DNAJC5	Module4	0.125782
1312	AKAP9	Module4	0.12569
1313	TCF20	Module4	0.125628
1314	KIAA0319L	Module4	0.125486
1315	LARP1	Module4	0.125407
1316	CCDC66	Module4	0.125384
1317	DPP7	Module4	0.124938
1318	CHD4	Module4	0.12479
1319	DOP1B	Module4	0.124769
1320	ANP32A	Module4	0.124429
1321	LUC7L	Module4	0.12401
1322	MAD1L1	Module4	0.123768
1323	SMAD7	Module4	0.123037
1324	LOC106997985	Module4	0.123035
1325	HDAC4	Module4	0.123016
1326	HEXA	Module4	0.123001
1327	PRPF4B	Module4	0.122983
1328	SAFB	Module4	0.122969
1329	NLRP1	Module4	0.122819
1330	PARVB	Module4	0.122788
1331	ACIN1	Module4	0.122681
1332	U2SURP	Module4	0.122182
1333	SLTM	Module4	0.122111
1334	MLXIPL	Module4	0.122091
1335	ICE1	Module4	0.122079
1336	FAM228B	Module4	0.121956
1337	AP2A2	Module4	0.12193
1338	RAI1	Module4	0.121696
1339	RPS6KA1	Module4	0.121596
1340	ZMAT1	Module4	0.121393
1341	ARHGAP4	Module4	0.121285
1342	KIAA0100	Module4	0.1211
1343	ZNF146	Module4	0.121086
1344	TRIM26	Module4	0.120879
1345	ZHX3	Module4	0.120569
1346	SBNO1	Module4	0.120383
1347	FGD2	Module4	0.119904
1348	CDK12	Module4	0.119769
1349	VPS53	Module4	0.119374
1350	PASK	Module4	0.11934
1351	SNRNP70	Module4	0.119292
1352	N4BP2	Module4	0.119137
1353	ARID3A	Module4	0.119128
1354	CLIP1	Module4	0.118919
1355	SLC36A4	Module4	0.118618
1356	RAB12	Module4	0.11859
1357	MLLT6	Module4	0.118398
1358	CDC16	Module4	0.118387
1359	RBM41	Module4	0.118164
1360	CCDC125	Module4	0.118134
1361	LUC7L3	Module4	0.117872
1362	BANP	Module4	0.117597
1363	SLF2	Module4	0.117316
1364	CORO7	Module4	0.117273
1365	MPRIP	Module4	0.117042
1366	MTAP	Module4	0.116305
1367	LOC106995407	Module4	0.11616
1368	IARS	Module4	0.11595
1369	MFSD11	Module4	0.115676
1370	NFATC1	Module4	0.115362
1371	PKN1	Module4	0.114922
1372	GYPC	Module4	0.114765
1373	WDR81	Module4	0.114228
1374	RIPK1	Module4	0.114156
1375	HDLBP	Module4	0.114133
1376	VASH1	Module4	0.114108
1377	CHD1L	Module4	0.114009
1378	USP7	Module4	0.113976
1379	AP4E1	Module4	0.113939
1380	TAF1	Module4	0.11373
1381	LOC702046	Module4	0.113626
1382	RAD50	Module4	0.113398
1383	TRIP11	Module4	0.113311
1384	KDM2B	Module4	0.113289
1385	VTA1	Module4	0.11326
1386	MCM3AP	Module4	0.112981
1387	EIF3A	Module4	0.112829
1388	ANAPC4	Module4	0.11278
1389	ARHGAP45	Module4	0.112705
1390	TECPR2	Module4	0.112509
1391	ZC3H7A	Module4	0.112241
1392	FOXK1	Module4	0.112221
1393	USP4	Module4	0.112004
1394	LOC114669903	Module4	0.111947
1395	CCDC88A	Module4	0.111678
1396	CUEDC1	Module4	0.111248
1397	ZMIZ1	Module4	0.111216
1398	OFD1	Module4	0.111147
1399	RIF1	Module4	0.111104
1400	AGAP1	Module4	0.110916
1401	MTOR	Module4	0.110916
1402	CEP295	Module4	0.110798
1403	EMSY	Module4	0.110741
1404	LOC114670013	Module4	0.110611
1405	BEND5	Module4	0.110515
1406	CENPJ	Module4	0.11037
1407	UBR4	Module4	0.110359
1408	LIMK1	Module4	0.110322
1409	LOC715936	Module4	0.110161
1410	DUSP22	Module4	0.110152
1411	SCLT1	Module4	0.110144
1412	FCHO1	Module4	0.109773
1413	RUFY1	Module4	0.109743
1414	GGA2	Module4	0.109706
1415	LOC702071	Module4	0.109687
1416	TFEB	Module4	0.109424
1417	CEP83	Module4	0.109325
1418	ERCC6	Module4	0.109057
1419	KIAA0753	Module4	0.108843
1420	CAPN3	Module4	0.108632
1421	PCID2	Module4	0.108583
1422	TBL1X	Module4	0.108572
1423	TMLHE	Module4	0.108341
1424	MADD	Module4	0.10824
1425	TCF25	Module4	0.108079
1426	KMT2D	Module4	0.107976
1427	TBCD	Module4	0.107968
1428	MDN1	Module4	0.107777
1429	RHBDF2	Module4	0.107224
1430	CNOT10	Module4	0.107219
1431	LOC106994194	Module4	0.107166
1432	SECISBP2L	Module4	0.107164
1433	ARHGEF1	Module4	0.10715
1434	CEP162	Module4	0.107015
1435	GTF2H1	Module4	0.106856
1436	ARHGEF2	Module4	0.106827
1437	MAST3	Module4	0.106819
1438	SLC45A4	Module4	0.1068
1439	LRSAM1	Module4	0.106602
1440	MROH1	Module4	0.10656
1441	FAM20C	Module4	0.106427
1442	INPP5A	Module4	0.106381
1443	ZC3H18	Module4	0.106154
1444	ABAT	Module4	0.106102
1445	PIEZO1	Module4	0.106005
1446	BIN1	Module4	0.105921
1447	ADAR	Module4	0.105883
1448	ERCC5	Module4	0.105739
1449	FHIT	Module4	0.105722
1450	DMXL2	Module4	0.105511
1451	CABIN1	Module4	0.105498
1452	MYO7A	Module4	0.105477
1453	RAB40AL	Module4	0.105393
1454	ZNF37A	Module4	0.105223
1455	MIA3	Module4	0.105144
1456	CDK5RAP2	Module4	0.105122
1457	HECTD4	Module4	0.10499
1458	MYO15B	Module4	0.104586
1459	KIF21B	Module4	0.104558
1460	ANKRD26	Module4	0.104418
1461	SLC44A2	Module4	0.104396
1462	C1H1orf127	Module4	0.10436
1463	LOC713572	Module4	0.104355
1464	CEP290	Module4	0.104292
1465	BICRA	Module4	0.103852
1466	FLOT1	Module4	0.103791
1467	RAB28	Module4	0.103779
1468	SF3B1	Module4	0.1031
1469	HPCAL1	Module4	0.102944
1470	SPTB	Module4	0.10293
1471	ADAMTS10	Module4	0.102832
1472	PIP4K2B	Module4	0.102732
1473	GCC2	Module4	0.10263
1474	KDM3A	Module4	0.102535
1475	NADK	Module4	0.102513
1476	GPRASP1	Module4	0.102476
1477	AKAP8L	Module4	0.102467
1478	NSD2	Module4	0.102443
1479	TTLL3	Module4	0.102421
1480	CLIP2	Module4	0.102191
1481	AP3D1	Module4	0.10219
1482	USP22	Module4	0.102054
1483	FHOD1	Module4	0.101835
1484	GCN1	Module4	0.10174
1485	SH3TC1	Module4	0.101681
1486	GAS6	Module4	0.101561
1487	MAPK8IP3	Module4	0.101523
1488	RNPC3	Module4	0.101475
1489	ARHGEF10L	Module4	0.10131
1490	DGKA	Module4	0.101172
1491	AASS	Module4	0.100974
1492	APOL5	Module4	0.10059
1493	ZBTB40	Module4	0.100533
1494	LOC711523	Module4	0.100501
1495	ANKRD27	Module4	0.100481
1496	CLCN6	Module4	0.100126
1497	PKIB	Module4	0.100106
1498	LOC100429133	Module4	0.100001
1499	ERCC3	Module4	0.0998927
1500	TCAIM	Module4	0.0998052
1501	FAM222B	Module4	0.0997691
1502	SRRM1	Module4	0.0997662
1503	MAPK9	Module4	0.099702
1504	SMC1A	Module4	0.0997007
1505	ZNF362	Module4	0.099597
1506	ZHX2	Module4	0.0995471
1507	ZDHHC20	Module4	0.099012
1508	FBH1	Module4	0.0987966
1509	LOC106994778	Module4	0.0983843
1510	SAFB2	Module4	0.0983793
1511	STAB1	Module4	0.0983786
1512	SUGP2	Module4	0.0982646
1513	PPME1	Module4	0.0982181
1514	ZNF445	Module4	0.0980601
1515	AGPAT3	Module4	0.0979538
1516	BAIAP2	Module4	0.0978755
1517	RIOX2	Module4	0.097864
1518	DZIP3	Module4	0.0972343
1519	UBE2O	Module4	0.0971014
1520	ZC3H7B	Module4	0.0970884
1521	SMARCA4	Module4	0.0968401
1522	ZNF160	Module4	0.0966636
1523	RASSF4	Module4	0.0966339
1524	RNMT	Module4	0.0965798
1525	ZNF821	Module4	0.0965369
1526	RPS6KA4	Module4	0.0965255
1527	RBM19	Module4	0.0963497
1528	HERC6	Module4	0.0961272
1529	CBWD1	Module4	0.0960472
1530	LOC100426034	Module4	0.0959673
1531	SELENOO	Module4	0.0959312
1532	LOC114679437	Module4	0.0958822
1533	TYK2	Module4	0.0958507
1534	SZT2	Module4	0.0957825
1535	EXD3	Module4	0.0957783
1536	GABRA3	Module4	0.0957574
1537	DCUN1D2	Module4	0.095721
1538	GRAMD1A	Module4	0.0956705
1539	DDX39B	Module4	0.0953752
1540	CSNK1D	Module4	0.0951748
1541	ZNF789	Module4	0.0951197
1542	LOC708994	Module4	0.0949116
1543	TPR	Module4	0.0948544
1544	PRPF38B	Module4	0.0948298
1545	BRD1	Module4	0.0945671
1546	SMARCC2	Module4	0.0943987
1547	RCC2	Module4	0.0943254
1548	PRMT7	Module4	0.0942531
1549	NOC3L	Module4	0.0941834
1550	LSM12	Module4	0.093897
1551	OSBPL2	Module4	0.0938774
1552	AFG3L2	Module4	0.0937111
1553	BCOR	Module4	0.0934006
1554	NAA16	Module4	0.093077
1555	SMYD4	Module4	0.092977
1556	EPHB2	Module4	0.092868
1557	CEP57	Module4	0.0928648
1558	LOC106997387	Module4	0.0928623
1559	RAD52	Module4	0.0927362
1560	PRKD2	Module4	0.0927037
1561	MARF1	Module4	0.0924491
1562	LARS	Module4	0.0923903
1563	CDK11B	Module4	0.0923797
1564	ACSM5	Module4	0.0922739
1565	INPPL1	Module4	0.0922433
1566	PKNOX1	Module4	0.0921859
1567	GOLGB1	Module4	0.0920854
1568	ADAP1	Module4	0.0920653
1569	PLXND1	Module4	0.0919244
1570	ZNF559	Module4	0.0918836
1571	NEK1	Module4	0.0917001
1572	LOC698665	Module4	0.0916929
1573	ETAA1	Module4	0.0916841
1574	THOC1	Module4	0.0915737
1575	GOLGA3	Module4	0.0911465
1576	LOC114672796	Module4	0.0910732
1577	ADGRF3	Module4	0.091024
1578	DGKD	Module4	0.0909338
1579	AKAP17A	Module4	0.0908974
1580	CAPRIN2	Module4	0.0908858
1581	DGKZ	Module4	0.0908558
1582	CCND1	Module4	0.0908457
1583	CMYA5	Module4	0.0906733
1584	GNPAT	Module4	0.0906475
1585	SEC16A	Module4	0.0904673
1586	CRAMP1	Module4	0.0904604
1587	TPM2	Module4	0.0903872
1588	CHFR	Module4	0.0903386
1589	LOC100423855	Module4	0.0899524
1590	SRCAP	Module4	0.0899107
1591	PRPF39	Module4	0.0897633
1592	LOC114676795	Module4	0.089636
1593	SEPTIN9	Module4	0.0895194
1594	SPG7	Module4	0.089111
1595	MPPE1	Module4	0.0889979
1596	AMPD3	Module4	0.08895
1597	CRTC1	Module4	0.088671
1598	PYGB	Module4	0.0886514
1599	GRIPAP1	Module4	0.0885644
1600	DNMT1	Module4	0.0884146
1601	PAK3	Module4	0.0880973
1602	LOC698860	Module4	0.0878414
1603	PPIL2	Module4	0.0877612
1604	MOB2	Module4	0.0877472
1605	PRR12	Module4	0.0876862
1606	TOPBP1	Module4	0.087654
1607	RANBP10	Module4	0.0875825
1608	RBBP6	Module4	0.0875132
1609	ATP13A2	Module4	0.0873255
1610	BRCC3	Module4	0.087312
1611	FLCN	Module4	0.0873037
1612	DBNL	Module4	0.0865954
1613	FRMD8	Module4	0.0864487
1614	CYTH4	Module4	0.0864436
1615	USP36	Module4	0.0861141
1616	PRKCD	Module4	0.0860735
1617	ZFP90	Module4	0.0859934
1618	FAM193B	Module4	0.0858746
1619	RASA4B	Module4	0.0857452
1620	GNA15	Module4	0.0856319
1621	NDUFA9	Module4	0.0854264
1622	CEP57L1	Module4	0.0851457
1623	DDX46	Module4	0.085066
1624	ZNF385A	Module4	0.0849981
1625	DAZAP1	Module4	0.0848759
1626	ZNF569	Module4	0.0848712
1627	BTK	Module4	0.0847769
1628	UPF1	Module4	0.0845818
1629	SETDB1	Module4	0.0845623
1630	DDX31	Module4	0.0844443
1631	DENND4B	Module4	0.0844102
1632	ITFG2	Module4	0.0842443
1633	SH2D3C	Module4	0.0842017
1634	STAT2	Module4	0.0841522
1635	MYO19	Module4	0.0840942
1636	MAU2	Module4	0.0839232
1637	PPP6R1	Module4	0.083807
1638	ARAP1	Module4	0.0837243
1639	LOC114672320	Module4	0.0836616
1640	IWS1	Module4	0.083649
1641	ILF3	Module4	0.0834995
1642	CTDP1	Module4	0.0834745
1643	MTA1	Module4	0.0834532
1644	FAM185A	Module4	0.0833518
1645	ZNF605	Module4	0.0831754
1646	LATS2	Module4	0.0829981
1647	OCRL	Module4	0.0829401
1648	AXIN1	Module4	0.0827232
1649	KSR1	Module4	0.0826575
1650	WDR60	Module4	0.0825273
1651	CCDC186	Module4	0.0823101
1652	DNAL1	Module4	0.0822038
1653	TANGO2	Module4	0.0820929
1654	TAF4	Module4	0.0819771
1655	GLE1	Module4	0.081802
1656	CASP8AP2	Module4	0.0817665
1657	TIMP2	Module4	0.0816755
1658	SCAP	Module4	0.0815982
1659	RNF214	Module4	0.0814689
1660	KDM4B	Module4	0.0814234
1661	RCHY1	Module4	0.0812126
1662	GTF3C1	Module4	0.0809458
1663	MTIF2	Module4	0.0808941
1664	L3MBTL1	Module4	0.0808672
1665	PRPF8	Module4	0.08073
1666	PAN2	Module4	0.0807209
1667	TBC1D9B	Module4	0.0806501
1668	ZSCAN26	Module4	0.0804594
1669	SLC25A29	Module4	0.0802999
1670	GGA3	Module4	0.0801217
1671	TSC1	Module4	0.080117
1672	ZBTB4	Module4	0.0800227
1673	HPS1	Module4	0.0795749
1674	NCBP3	Module4	0.0795243
1675	IQCN	Module4	0.0795171
1676	LOC708768	Module4	0.0794459
1677	DDX60	Module4	0.0793951
1678	THEMIS2	Module4	0.0793684
1679	PARP9	Module4	0.0793385
1680	RANBP3	Module4	0.0792949
1681	MAEA	Module4	0.0791934
1682	SLC38A10	Module4	0.079006
1683	PHRF1	Module4	0.0789721
1684	XXYLT1	Module4	0.0788546
1685	SUPT6H	Module4	0.078828
1686	DLG4	Module4	0.0787079
1687	BATF3	Module4	0.0783592
1688	GOLGA1	Module4	0.0783282
1689	PYROXD2	Module4	0.0782513
1690	LOC114671785	Module4	0.0780719
1691	ZFYVE26	Module4	0.0779531
1692	LOC114679374	Module4	0.0779172
1693	SCN1B	Module4	0.0777282
1694	CCDC88B	Module4	0.0776948
1695	PRKAG1	Module4	0.0776884
1696	EFTUD2	Module4	0.0776406
1697	TBX10	Module4	0.0776363
1698	TATDN2	Module4	0.0775731
1699	ZSWIM8	Module4	0.077467
1700	ARRB2	Module4	0.0772572
1701	ACSF3	Module4	0.0771982
1702	ERV3-1	Module4	0.0771613
1703	LOC717030	Module4	0.0770742
1704	CTNS	Module4	0.0769265
1705	UNK	Module4	0.0766554
1706	AATK	Module4	0.0766245
1707	LOC106994675	Module4	0.0765297
1708	HPN	Module4	0.0760826
1709	USF2	Module4	0.0760714
1710	MIER2	Module4	0.0760616
1711	PIK3R6	Module4	0.0760234
1712	CEP250	Module4	0.0759958
1713	ARID5A	Module4	0.0758733
1714	LOC114670456	Module4	0.0758598
1715	FSCN1	Module4	0.0757726
1716	RABL6	Module4	0.0757529
1717	PFKFB4	Module4	0.0757374
1718	HDAC5	Module4	0.0754948
1719	GRK2	Module4	0.0754051
1720	GABPB2	Module4	0.0753702
1721	BID	Module4	0.0753517
1722	ELL	Module4	0.0752873
1723	PLXNB2	Module4	0.0748359
1724	LOC106996507	Module4	0.0747864
1725	TMC6	Module4	0.0746641
1726	RBAK	Module4	0.0745523
1727	PNN	Module4	0.07453
1728	HSF1	Module4	0.0744373
1729	FBRSL1	Module4	0.0741741
1730	TECPR1	Module4	0.0740265
1731	MAN2C1	Module4	0.0738797
1732	GALNS	Module4	0.0738201
1733	GPI	Module4	0.0738056
1734	SGTA	Module4	0.0737572
1735	ANKZF1	Module4	0.0736026
1736	TMEM94	Module4	0.073566
1737	BRF1	Module4	0.0735608
1738	LENG8	Module4	0.0735334
1739	ERCC8	Module4	0.0734272
1740	PIP5K1C	Module4	0.0732968
1741	UBE3B	Module4	0.0732966
1742	INTS3	Module4	0.0730679
1743	ZNF16	Module4	0.0730457
1744	NOTCH1	Module4	0.0729115
1745	MTMR8	Module4	0.0728454
1746	TMEM259	Module4	0.0726971
1747	ZNF195	Module4	0.0726938
1748	BRCA1	Module4	0.0725351
1749	DIXDC1	Module4	0.0723385
1750	JADE2	Module4	0.0722808
1751	LOC712069	Module4	0.0721765
1752	ARMC7	Module4	0.0721369
1753	DTX2	Module4	0.0718303
1754	CTBP1	Module4	0.0717917
1755	LOC106996122	Module4	0.0717914
1756	TMEM184B	Module4	0.071662
1757	SMG9	Module4	0.0714478
1758	CUL9	Module4	0.0713872
1759	PCDHGA10	Module4	0.0712423
1760	SACS	Module4	0.0711587
1761	DHX37	Module4	0.0711519
1762	ZNF76	Module4	0.0711032
1763	GNL3	Module4	0.0710842
1764	TSNARE1	Module4	0.0710435
1765	KIAA0930	Module4	0.0709928
1766	TBC1D10A	Module4	0.070949
1767	CUL4B	Module4	0.070851
1768	CSNK1E	Module4	0.0706979
1769	HPS4	Module4	0.070659
1770	LOC106999066	Module4	0.0704945
1771	GNL3L	Module4	0.0704663
1772	ABCD4	Module4	0.0704326
1773	EIF4G1	Module4	0.0703907
1774	ARHGEF18	Module4	0.070129
1775	ZBED4	Module4	0.0700495
1776	NISCH	Module4	0.0699863
1777	ANKRD13D	Module4	0.0699839
1778	SCLY	Module4	0.0698873
1779	TP53I13	Module4	0.0697837
1780	TUBGCP2	Module4	0.0697709
1781	CAMTA2	Module4	0.0697383
1782	CCL25	Module4	0.069699
1783	LOC719386	Module4	0.0696966
1784	CD300LF	Module4	0.0696278
1785	GIGYF1	Module4	0.069458
1786	PEX1	Module4	0.0692558
1787	PDPR	Module4	0.0689084
1788	PNPLA6	Module4	0.0688202
1789	SH3BP2	Module4	0.0687833
1790	RAB3IL1	Module4	0.0687177
1791	DPP9	Module4	0.0686444
1792	LOC114675015	Module4	0.0686194
1793	PLEKHO1	Module4	0.068564
1794	LRRC27	Module4	0.068563
1795	IRAK1	Module4	0.068551
1796	D2HGDH	Module4	0.0683199
1797	STRN4	Module4	0.0681855
1798	LOC714257	Module4	0.0680565
1799	ZNF649	Module4	0.0678252
1800	SYMPK	Module4	0.0677572
1801	MGRN1	Module4	0.0676836
1802	RAB11FIP3	Module4	0.06767
1803	MSL1	Module4	0.0676311
1804	CLK2	Module4	0.0676089
1805	SLC12A9	Module4	0.0675772
1806	LOC114679375	Module4	0.0673468
1807	ATN1	Module4	0.0672279
1808	SEPTIN8	Module4	0.0669113
1809	DENND1C	Module4	0.0668919
1810	BAZ2A	Module4	0.066582
1811	STK11IP	Module4	0.06639
1812	PTPN23	Module4	0.0662887
1813	HDAC7	Module4	0.0661512
1814	MPC1	Module4	0.0661413
1815	PDXK	Module4	0.0659885
1816	PRPF3	Module4	0.0659883
1817	EIF5B	Module4	0.0658858
1818	TTLL4	Module4	0.0658808
1819	UBA1	Module4	0.0657932
1820	BFAR	Module4	0.0657408
1821	HEXD	Module4	0.0656828
1822	MEGF8	Module4	0.0656188
1823	ZNF251	Module4	0.0654703
1824	GCNA	Module4	0.065346
1825	PRRC2A	Module4	0.065142
1826	LOC107000659	Module4	0.0650782
1827	GTF2IRD1	Module4	0.0647848
1828	LDB1	Module4	0.0647355
1829	STARD3	Module4	0.0646906
1830	FLYWCH1	Module4	0.0646159
1831	SHPK	Module4	0.0645725
1832	STAT6	Module4	0.064571
1833	PALB2	Module4	0.0645199
1834	FANCA	Module4	0.0643271
1835	ARSD	Module4	0.0642574
1836	KDM5D	Module4	0.064246
1837	WDR5	Module4	0.0641196
1838	LOC715685	Module4	0.064062
1839	MTG1	Module4	0.0640218
1840	SIPA1	Module4	0.0637075
1841	ZNF384	Module4	0.0636976
1842	TRIM8	Module4	0.0635293
1843	MED12	Module4	0.0634999
1844	PEX6	Module4	0.0633904
1845	SH3BP1	Module4	0.0632945
1846	CDH4	Module4	0.063292
1847	UBTF	Module4	0.0632296
1848	IVD	Module4	0.0631256
1849	IK	Module4	0.06306
1850	TOP3A	Module4	0.0629082
1851	SIN3B	Module4	0.0628771
1852	LOC107000414	Module4	0.0627869
1853	LOC106997914	Module4	0.0626808
1854	ULK1	Module4	0.0625834
1855	B3GNTL1	Module4	0.0625068
1856	DVL3	Module4	0.0623898
1857	SH2B2	Module4	0.0623588
1858	TNIK	Module4	0.0621587
1859	MAP4K1	Module4	0.061908
1860	GMIP	Module4	0.0616884
1861	SS18L1	Module4	0.0615427
1862	KAT2A	Module4	0.0615341
1863	NOP14	Module4	0.0613788
1864	PGBD1	Module4	0.0611682
1865	UNKL	Module4	0.0610931
1866	UBE2L3	Module4	0.0610762
1867	DEF8	Module4	0.0609899
1868	NUP85	Module4	0.0605598
1869	AMT	Module4	0.0604729
1870	CLCN7	Module4	0.0604684
1871	GGA1	Module4	0.060458
1872	CBFA2T3	Module4	0.060448
1873	CSAD	Module4	0.0603599
1874	SLC12A7	Module4	0.0602192
1875	IFT172	Module4	0.0600369
1876	CNTROB	Module4	0.0599537
1877	IKBKG	Module4	0.0599483
1878	CSNK1G2	Module4	0.0598643
1879	C2CD2L	Module4	0.0597717
1880	RNF31	Module4	0.0593037
1881	DHX34	Module4	0.0590953
1882	MAP3K11	Module4	0.0590865
1883	SBNO2	Module4	0.059081
1884	NOM1	Module4	0.0588829
1885	TAOK2	Module4	0.0586822
1886	DGCR8	Module4	0.0584723
1887	FAM234A	Module4	0.0583283
1888	HDAC10	Module4	0.0582058
1889	TNPO2	Module4	0.0581711
1890	MARS	Module4	0.0581309
1891	CACNA1F	Module4	0.0580627
1892	VPS52	Module4	0.0578226
1893	KMT2B	Module4	0.0577578
1894	LOC714265	Module4	0.0577515
1895	PSD4	Module4	0.0576535
1896	RBM10	Module4	0.0573929
1897	AGAP3	Module4	0.0571762
1898	DHX38	Module4	0.0571558
1899	STAT5A	Module4	0.0570697
1900	CCDC130	Module4	0.0570115
1901	PLD2	Module4	0.0568986
1902	SEMA4A	Module4	0.05673
1903	L3MBTL2	Module4	0.0566187
1904	ATF6B	Module4	0.056464
1905	ZFP30	Module4	0.0564512
1906	ING5	Module4	0.0564449
1907	TTF1	Module4	0.0563216
1908	NSMF	Module4	0.0561446
1909	CCZ1	Module4	0.0561329
1910	SGSM2	Module4	0.0559858
1911	CAMKK2	Module4	0.0559557
1912	PLK3	Module4	0.0559327
1913	TOB2	Module4	0.0558406
1914	PACS2	Module4	0.0558053
1915	RNF126	Module4	0.0554897
1916	UPF3A	Module4	0.0551454
1917	EHBP1L1	Module4	0.0551182
1918	COG4	Module4	0.0549148
1919	C1H1orf159	Module4	0.0549138
1920	EIF2B5	Module4	0.0547649
1921	LTO1	Module4	0.0547275
1922	DOT1L	Module4	0.054711
1923	TRMU	Module4	0.0541484
1924	PBX2	Module4	0.0534277
1925	ZNF276	Module4	0.0529647
1926	KHNYN	Module4	0.0526828
1927	TSPYL2	Module4	0.0524864
1928	ZNF841	Module4	0.0523871
1929	NXN	Module4	0.0522882
1930	EXOSC10	Module4	0.0521591
1931	STK11	Module4	0.0519552
1932	RNF20	Module4	0.0517804
1933	TSC2	Module4	0.0517696
1934	DDX55	Module4	0.0514215
1935	SMPD4	Module4	0.0510362
1936	GTPBP2	Module4	0.0507612
1937	CDK9	Module4	0.0506886
1938	CSF2RB	Module4	0.0506459
1939	U2AF2	Module4	0.0505265
1940	EML3	Module4	0.0504301
1941	NOP56	Module4	0.0502989
1942	TMEM214	Module4	0.0502094
1943	CARM1	Module4	0.0501499
1944	ZNF836	Module4	0.0499881
1945	RGS14	Module4	0.0499089
1946	NOXA1	Module4	0.0497908
1947	TRMT10B	Module4	0.0497713
1948	LOC698538	Module4	0.0496296
1949	SLC15A3	Module4	0.0494253
1950	RANGAP1	Module4	0.0492724
1951	LOC106993236	Module4	0.0486783
1952	RNF40	Module4	0.0485633
1953	FBRS	Module4	0.048445
1954	PCBP4	Module4	0.0484431
1955	SETD1B	Module4	0.0482319
1956	IFFO1	Module4	0.0476534
1957	LDLRAP1	Module4	0.047648
1958	MFN2	Module4	0.0475458
1959	AP5Z1	Module4	0.0473915
1960	LAS1L	Module4	0.0469247
1961	ARFGAP2	Module4	0.0469074
1962	REXO1	Module4	0.0465924
1963	SRRT	Module4	0.046553
1964	TTYH3	Module4	0.0462172
1965	HS6ST1	Module4	0.0457564
1966	HSP90AA1	Module4	0.0457137
1967	TUBGCP5	Module4	0.0456314
1968	ZGPAT	Module4	0.0445261
1969	ZBED1	Module4	0.0439758
1970	LRRCC1	Module4	0.0437736
1971	CC2D1B	Module4	0.0435651
1972	CTDSP1	Module4	0.0432791
1973	VPS9D1	Module4	0.0428226
1974	EFEMP2	Module4	0.042487
1975	NEURL4	Module4	0.0420573
1976	CPSF1	Module4	0.0409637
1977	SBF1	Module4	0.0404316
1978	SAMD9L	Module4	0.0401894
1979	LOC707555	Module4	0.0401883
1980	ZNF318	Module4	0.0401705
1981	PTBP1	Module4	0.0400399
1982	VPS16	Module4	0.0400287
1983	CCDC9	Module4	0.0399845
1984	GET4	Module4	0.0392792
1985	NELFB	Module4	0.0390656
1986	PPP1R9B	Module4	0.038735
1987	ABCA7	Module4	0.0385762
1988	RHOT2	Module4	0.0385321
1989	LRCH4	Module4	0.0373403
1990	INTS1	Module4	0.0373196
1991	FCHSD1	Module4	0.0371372
1992	TAZ	Module4	0.0370764
1993	SUN1	Module4	0.0369501
1994	SH2B1	Module4	0.0361344
1995	TEPSIN	Module4	0.0357092
1996	ASPSCR1	Module4	0.0356167
1997	CDAN1	Module4	0.0353139
1998	CIC	Module4	0.034951
1999	HGS	Module4	0.0349304
[truncated: 398 more rows]
