# Supplementary material for: Opioid-induced immunosuppression of brain myeloid cells in SIV-infected rhesus macaques
Source: Research Square preprint supplement (doi:10.21203/rs.3.rs-7394731/v1), 2025-09-18
Supplement: Supplementary file 7 [file cee8ab2576c533207fa6cc5c.xlsx]

## Sheet: Animal information
Animal	Group	Age at necropsy	Weeks Infected	Weeks ART treatment	Weeks suppressed
105T	Morphine	15 years, 6 months	N/A	N/A	N/A
110T		16 years, 8 months	N/A	N/A	N/A
115T		16 years, 8 months	N/A	N/A	N/A
116T		15 years, 10 months	N/A	N/A	N/A
107T	MorphineSIV	16 years, 9 months	34.8571	30	24.8571
114T		16 years, 7 months	39.8571	35	25.1429
117T		15 years, 9 months	42.8571	38	23.8571
122T		15 years, 5 months	45.8571	41	26.8571
104T	Saline	15 years, 4 months	N/A	N/A	N/A
106T		16 years, 10 months	N/A	N/A	N/A
111T		16 years, 11 months	N/A	N/A	N/A
120T		15 years, 11 months	N/A	N/A	N/A
108T	Saline SIV	16 years, 8 months	35.4286	30.5714	25.4286
109T		16 years, 10 months	35.7143	30.8571	25.7143
113T		14 years, 2 months	38.8571	34	24.1429
121T		15 years, 11 months	45.5714	40.7143	26.7143

## Sheet: Seq summary
ID	Group	Pipeline version	Estimated number of cells	Feature linkages detected	Linked genes	Linked peaks	ATAC Confidently mapped read pairs	ATAC Fraction of genome in peaks	ATAC Fraction of high-quality fragments in cells	ATAC Fraction of high-quality fragments overlapping TSS	ATAC Fraction of high-quality fragments overlapping peaks	ATAC Fraction of transposition events in peaks in cells	ATAC Mean raw read pairs per cell	ATAC Median high-quality fragments per cell	ATAC Non-nuclear read pairs	ATAC Number of peaks	ATAC Percent duplicates	ATAC Q30 bases in barcode	ATAC Q30 bases in read 1	ATAC Q30 bases in read 2	ATAC Q30 bases in sample index i1	ATAC Sequenced read pairs	ATAC TSS enrichment score	ATAC Unmapped read pairs	ATAC Valid barcodes	GEX Fraction of transcriptomic reads in cells	GEX Mean raw reads per cell	GEX Median UMI counts per cell	GEX Median genes per cell	GEX Percent duplicates	GEX Q30 bases in UMI	GEX Q30 bases in barcode	GEX Q30 bases in read 2	GEX Q30 bases in sample index i1	GEX Q30 bases in sample index i2	GEX Reads mapped antisense to gene	GEX Reads mapped confidently to exonic regions	GEX Reads mapped confidently to genome	GEX Reads mapped confidently to intergenic regions	GEX Reads mapped confidently to intronic regions	GEX Reads mapped confidently to transcriptome	GEX Reads mapped to genome	GEX Reads with TSO	GEX Sequenced read pairs	GEX Total genes detected	GEX Valid UMIs	GEX Valid barcodes	Number of cells before filtering	Number of cells after filtering
104T	Saline	cellranger-arc-2.0.2	13366	48759	6069	20354	0.9248	0.0395	0.9393	0.4979	0.7138	0.6676	19244.3	10216.5	0.0001	134139	0.3534	0.912	0.9297	0.9292	0.8999	257219049	8.9215	0.0166	0.973	0.7942	61704.9	7144	2495.5	0.737	0.9567	0.9595	0.9353	0.9575	0.9493	0.1643	0.3894	0.9094	0.0788	0.4411	0.6648	0.9546	0.1826	824747603	27406	0.9993	0.9325	13366	8902
106T		cellranger-arc-2.0.2	6788	99676	6007	25388	0.9041	0.0384	0.8801	0.4638	0.6663	0.6296	37258	14692	0.0002	129629	0.4165	0.9161	0.9371	0.9313	0.8837	252907377	8.8946	0.0156	0.9765	0.8676	112587	3071	1636	0.9156	0.9602	0.9623	0.933	0.9502	0.9455	0.1779	0.2802	0.8717	0.0925	0.499	0.5996	0.9288	0.2016	764240140	26075	0.9992	0.9474	6788	5523
111T		cellranger-arc-2.0.2	20000	24833	3871	13877	0.9302	0.0418	0.8514	0.4988	0.7251	0.6843	14940.2	6214	0	142234	0.3271	0.9203	0.9261	0.9311	0.9111	298803225	9.7812	0.0171	0.9791	0.7206	42561.1	1708	1037	0.8836	0.9586	0.9611	0.9397	0.9517	0.9422	0.1884	0.3344	0.8991	0.0966	0.4681	0.6122	0.954	0.0912	851221779	26055	0.9993	0.9446	20000	12963
120T		cellranger-arc-2.0.2	5150	262560	7738	45609	0.9184	0.0424	0.9124	0.4611	0.6892	0.6464	48810.4	18876.5	0	143610	0.5124	0.9176	0.9391	0.9317	0.8894	251373598	8.3972	0.0215	0.9765	0.7533	158001	3555	1656	0.9317	0.9568	0.9602	0.9306	0.965	0.9518	0.1213	0.4338	0.8392	0.0737	0.3317	0.6428	0.9358	0.1807	813703632	24809	0.9992	0.9525	5150	2704
108T	SalineSIV	cellranger-arc-2.0.2	14091	14476	3171	14613	0.8278	0.0332	0.8395	0.5845	0.8472	0.7951	41324.7	3331	0.0006	111886	0.865	0.9291	0.9569	0.9437	0.9374	582306280	11.0459	0.0339	0.9802	0.6861	35245.4	3339	1755	0.7891	0.9581	0.96	0.946	0.9625	0.917	0.1063	0.3824	0.9027	0.1025	0.4178	0.6918	0.9567	0.1561	496642388	25704	0.9994	0.9436	14091	9049
109T		cellranger-arc-2.0.2	9239	103399	6040	24205	0.9177	0.0378	0.8377	0.5075	0.7327	0.6869	29184.9	11671	0	127665	0.4436	0.9143	0.9357	0.9282	0.8854	269639557	9.067	0.0164	0.9777	0.806	72592.6	4103	1927	0.8619	0.9578	0.9611	0.9362	0.9721	0.9375	0.1806	0.3347	0.8952	0.0947	0.4659	0.595	0.946	0.162	670683005	26256	0.9992	0.9388	9239	7308
113T		cellranger-arc-2.0.2	4047	11231	1609	8260	0.8954	0.0373	0.8994	0.5052	0.7445	0.6998	48268.4	16338	0	125427	0.5922	0.9106	0.9341	0.9265	0.9022	195342282	8.9377	0.0553	0.9749	0.6489	167832	2376	1415	0.9635	0.9567	0.9599	0.9459	0.9689	0.9498	0.1521	0.4261	0.9056	0.1111	0.3685	0.6227	0.9648	0.0582	679217648	22516	0.9992	0.941	4047	3215
121T		cellranger-arc-2.0.2	8330	140985	6064	32136	0.8795	0.0414	0.9287	0.4832	0.7189	0.6737	31021.7	14867	0	140358	0.4319	0.9172	0.9341	0.9313	0.8986	258410999	9.1912	0.0709	0.9771	0.7979	97714.3	3566	1777	0.9213	0.9585	0.9615	0.9452	0.951	0.9659	0.1368	0.4273	0.8841	0.0806	0.3761	0.665	0.9565	0.0993	813959876	25287	0.9991	0.9478	8330	4487
105T	Morphine	cellranger-arc-2.0.2	15865	8940	2449	9196	0.9319	0.0394	0.9556	0.4974	0.7266	0.6825	16641.6	9327	0	134079	0.309	0.9162	0.932	0.9299	0.8969	264019320	9.3829	0.0155	0.9748	0.8711	45476.2	6053	2313	0.7187	0.957	0.9597	0.9385	0.9633	0.94	0.1901	0.3162	0.9203	0.0832	0.5209	0.6454	0.9579	0.1334	721479688	26897	0.9992	0.9342	15865	11235
110T		cellranger-arc-2.0.2	5032	10384	2055	10415	0.9221	0.0364	0.8949	0.4832	0.6995	0.656	46619.6	19376	0	122729	0.5182	0.917	0.9354	0.9307	0.8858	234589645	8.8046	0.019	0.9762	0.8312	128015	3928	1811	0.9341	0.9579	0.9606	0.9406	0.953	0.9406	0.1659	0.3387	0.8951	0.0892	0.4673	0.6384	0.9542	0.1185	644173090	24609	0.9991	0.9471	5032	3622
115T		cellranger-arc-2.0.2	8029	13126	2746	10051	0.9275	0.0405	0.9294	0.4907	0.7259	0.6843	35340.3	16753	0.0001	137316	0.4419	0.9175	0.9365	0.9309	0.8847	283747164	9.166	0.0137	0.9777	0.8611	103535	3238	1665	0.9297	0.9583	0.9613	0.9345	0.973	0.9472	0.1358	0.2603	0.8747	0.092	0.5225	0.645	0.9252	0.2051	831286327	25255	0.9992	0.9564	8029	6771
116T		cellranger-arc-2.0.2	8840	23383	3133	14669	0.9362	0.0406	0.9529	0.4884	0.713	0.6702	28824.9	14703	0	137395	0.4163	0.911	0.9385	0.9231	0.8944	254811819	9.0643	0.0147	0.9755	0.8447	95403.7	4486	1945	0.9023	0.9577	0.9603	0.9426	0.9425	0.9526	0.138	0.3261	0.9046	0.0961	0.4825	0.6686	0.9561	0.1259	843368344	26037	0.9991	0.952	8840	6023
107T	MorphineSIV	cellranger-arc-2.0.2	11594	37588	4428	18110	0.9314	0.04	0.9523	0.4899	0.7128	0.6675	21990.7	12458	0	135675	0.3393	0.9203	0.92	0.9318	0.859	254960423	9.2308	0.0152	0.9777	0.8342	58258.9	4368	1940	0.841	0.9582	0.9608	0.9412	0.9624	0.9285	0.157	0.3526	0.8983	0.0856	0.4601	0.654	0.9549	0.1224	675454090	26247	0.9991	0.9463	11594	6841
114T		cellranger-arc-2.0.2	6122	11610	1971	8790	0.9351	0.0392	0.9392	0.4896	0.6947	0.6454	97531.8	24731	0	133317	0.6672	0.9301	0.9425	0.9449	0.9136	597089722	8.7752	0.0153	0.981	0.8674	90379.6	4376	1949	0.8799	0.9608	0.9629	0.9451	0.9724	0.9351	0.1719	0.3064	0.8982	0.0931	0.4986	0.6313	0.9482	0.1122	553303893	25553	0.9992	0.9464	6122	4765
117T		cellranger-arc-2.0.2	7761	40276	3868	16023	0.9325	0.0405	0.949	0.4901	0.709	0.6643	35946.2	19106	0.0001	137487	0.4043	0.9163	0.9365	0.9266	0.8747	278978735	9.1055	0.0129	0.9762	0.8765	86503.4	4108	1931	0.8958	0.9581	0.9613	0.9305	0.9672	0.9268	0.1739	0.2982	0.8942	0.0904	0.5056	0.628	0.9439	0.1627	671352755	25899	0.9991	0.9468	7761	6383
122T		cellranger-arc-2.0.2	8760	64011	4829	23556	0.9417	0.0452	0.9488	0.4844	0.7284	0.6846	32399.1	14633	0	153174	0.4407	0.9185	0.9368	0.9331	0.8925	283815714	8.9543	0.0131	0.9758	0.8623	83021.7	3492	1663	0.903	0.9588	0.9612	0.9302	0.9651	0.9515	0.1584	0.2852	0.8697	0.0923	0.4922	0.6173	0.9323	0.2057	727269994	25422	0.9992	0.9526	8760	6339
