# Supplementary material for: Opioid-induced immunosuppression of brain myeloid cells in SIV-infected rhesus macaques
Source: Research Square preprint supplement (doi:10.21203/rs.3.rs-7394731/v1), 2025-09-18
Supplement: Supplementary file 8 [file f1f6aceb16a81f486c75413c.xlsx]

## Sheet: Morphine_vs_Saline
gene	cluster_id	baseMean	logFC	lfcSE	stat	p_val	p_adj.loc	p_adj.glb	contrast
FZD7	Homeostatic	86.369	-4.11216	0.830514	-4.95135	7.37004e-07	0.0132167	0.0134267	Morphine-Saline			p_adj.loc: local adjusted p-value. This is the cluster-specific adjusted p-value. It is derived by correcting fot multiple comparisons within each cell type
BACH2	Activated	49.8232	1.7144	0.336966	5.08775	3.62328e-07	0.00495303	0.0132018	Morphine-Saline			p_adj.glb: global adjusted p-value. This is the experiment-wide adjusted p-value. It corrects for multiple comparisons across all clusters and genes
PAM	Activated	161.782	0.878846	0.179361	4.89986	9.59035e-07	0.00655501	0.0139774	Morphine-Saline			lfcSE: log fold change standard error. It represents the standard error associated with the log fold change estimate for a given gene
WNT5A	Activated	14.3618	4.56625	1.02241	4.46617	7.96312e-06	0.0362853	0.0644765	Morphine-Saline
CLEC7A	Activated	463.066	2.01345	0.459677	4.38015	1.18596e-05	0.0405302	0.0857471	Morphine-Saline
CLEC7A	Antiviral	47.1516	3.5454	0.713585	4.96843	6.74957e-07	0.00558055	0.0134267	Morphine-Saline
LOC704510	Antiviral	12.0574	-7.60185	1.57959	-4.81253	1.49028e-06	0.00616081	0.0180999	Morphine-Saline
SEPTIN9	Antiviral	17.8056	2.40452	0.512674	4.69015	2.73005e-06	0.00752401	0.0284206	Morphine-Saline
LOC693820	CD16+CAM	25.4323	-21.3993	2.71063	-7.89458	2.91288e-15	1.91202e-11	2.12268e-10	Morphine-Saline

## Sheet: MorphineSIV_vs_Saline
gene	cluster_id	baseMean	logFC	lfcSE	stat	p_val	p_adj.loc	p_adj.glb	contrast
CCK	Homeostatic	60.2581	-24.1253	4.2067	-5.73496	9.75379e-09	0.000174915	0.000710778	MorphineSIV-Saline			p_adj.loc: local adjusted p-value. This is the cluster-specific adjusted p-value. It is derived by correcting fot multiple comparisons within each cell type
SLC6A11	Homeostatic	65.2014	-2.81427	0.616652	-4.56378	5.02396e-06	0.0167103	0.0291015	MorphineSIV-Saline			p_adj.glb: global adjusted p-value. This is the experiment-wide adjusted p-value. It corrects for multiple comparisons across all clusters and genes
DNAJC10	Homeostatic	1371.48	-0.861284	0.189656	-4.5413	5.59091e-06	0.0167103	0.0291015	MorphineSIV-Saline			lfcSE: log fold change standard error. It represents the standard error associated with the log fold change estimate for a given gene
FZD7	Homeostatic	86.369	-3.9045	0.828408	-4.71325	2.43792e-06	0.0167103	0.0180346	MorphineSIV-Saline
MRO	Homeostatic	76.459	-2.5213	0.538261	-4.68415	2.81127e-06	0.0167103	0.0186239	MorphineSIV-Saline
LOC114674304	Homeostatic	35.1308	2.29223	0.503392	4.55357	5.27422e-06	0.0167103	0.0291015	MorphineSIV-Saline
LOC114677629	Homeostatic	38.9635	-1.59159	0.368804	-4.31554	1.59213e-05	0.0407882	0.0682482	MorphineSIV-Saline
SLC39A8	Homeostatic	599.425	-0.850142	0.199552	-4.26025	2.04201e-05	0.0457742	0.0783187	MorphineSIV-Saline
DNAJC10	Activated	264.527	-0.749657	0.159156	-4.71019	2.47484e-06	0.033831	0.0180346	MorphineSIV-Saline
LOC114676795	Microglia-like	48.0655	2.20183	0.426901	5.15771	2.49988e-07	0.00204865	0.00455427	MorphineSIV-Saline
RAB20	Microglia-like	203.618	1.11316	0.222096	5.01208	5.38444e-07	0.00220627	0.0078475	MorphineSIV-Saline
PITPNM1	Microglia-like	27.0261	1.71891	0.351421	4.89131	1.00166e-06	0.00273621	0.0121655	MorphineSIV-Saline
CBFA2T3	Microglia-like	37.9356	2.28925	0.476584	4.80345	1.55955e-06	0.00319512	0.0144428	MorphineSIV-Saline
ARHGAP26	Microglia-like	532.499	0.850119	0.200695	4.23587	2.27673e-05	0.0357617	0.0829551	MorphineSIV-Saline
LOC698152	Microglia-like	192.874	1.45856	0.346916	4.20435	2.61831e-05	0.0357617	0.0908578	MorphineSIV-Saline
CLEC7A	Microglia-like	68.3722	2.14249	0.516424	4.14871	3.34354e-05	0.0391433	0.11075	MorphineSIV-Saline
SEPTIN9	Antiviral	17.8056	2.77596	0.506101	5.48499	4.13482e-08	0.000341867	0.00100438	MorphineSIV-Saline
CLEC7A	Antiviral	47.1516	3.18505	0.714792	4.4559	8.35402e-06	0.0345355	0.0400649	MorphineSIV-Saline
MAMU-DQA1	CD14+CAM	80.1553	-1.54372	0.278289	-5.54718	2.9032e-08	0.000194573	0.00100438	MorphineSIV-Saline
GPR183	CD14+CAM	50.3826	-1.50052	0.3126	-4.80014	1.58555e-06	0.00531318	0.0144428	MorphineSIV-Saline
MAMU-DPA	CD14+CAM	34.9143	-2.18311	0.491159	-4.44481	8.79677e-06	0.019652	0.0400649	MorphineSIV-Saline
MAMU-DRB5	CD14+CAM	98.182	-1.25791	0.293215	-4.29006	1.78621e-05	0.0299279	0.0723137	MorphineSIV-Saline

## Sheet: SalineSIV_vs_Saline
gene	cluster_id	baseMean	logFC	lfcSE	stat	p_val	p_adj.loc	p_adj.glb	contrast
FES	Homeostatic	596.75	0.544067	0.0876391	6.20804	5.36486e-10	9.6208e-06	3.90948e-05	SalineSIV-Saline			p_adj.loc: local adjusted p-value. This is the cluster-specific adjusted p-value. It is derived by correcting fot multiple comparisons within each cell type
ADORA2B	Homeostatic	1325.41	7.59813	1.28235	5.92516	3.11993e-09	2.79748e-05	0.000113678	SalineSIV-Saline			p_adj.glb: global adjusted p-value. This is the experiment-wide adjusted p-value. It corrects for multiple comparisons across all clusters and genes
LOC114675275	Homeostatic	31.7758	-21.7809	3.74729	-5.81245	6.15658e-09	3.6802e-05	0.000149547	SalineSIV-Saline			lfcSE: log fold change standard error. It represents the standard error associated with the log fold change estimate for a given gene
LOC100499503	Homeostatic	663.353	6.78398	1.22215	5.55085	2.84279e-08	8.64981e-05	0.000301278	SalineSIV-Saline
LOC114679371	Homeostatic	557.011	6.08225	1.094	5.55964	2.70336e-08	8.64981e-05	0.000301278	SalineSIV-Saline
LOC114672447	Homeostatic	41.0325	-23.3402	4.20717	-5.54773	2.89404e-08	8.64981e-05	0.000301278	SalineSIV-Saline
LOC106998573	Homeostatic	497.044	8.91341	1.61887	5.50594	3.67198e-08	9.4071e-05	0.000311248	SalineSIV-Saline
RBPMS	Homeostatic	737.295	8.22142	1.54855	5.30912	1.10155e-07	0.000246927	0.000802724	SalineSIV-Saline
PPP1R14C	Homeostatic	87.3844	-4.17633	0.794682	-5.25535	1.47741e-07	0.000294382	0.000978745	SalineSIV-Saline
LOC114673210	Homeostatic	3192.9	5.63021	1.09797	5.12782	2.93121e-07	0.000491235	0.00137236	SalineSIV-Saline
TMC6	Homeostatic	253.746	2.77196	0.541121	5.12262	3.01321e-07	0.000491235	0.00137236	SalineSIV-Saline
LOC114670439	Homeostatic	22.1764	-3.8593	0.789422	-4.88877	1.01466e-06	0.00151633	0.00369703	SalineSIV-Saline
TMEM106C	Homeostatic	472.225	1.17875	0.244838	4.81441	1.47636e-06	0.00203658	0.00512311	SalineSIV-Saline
FZD7	Homeostatic	86.369	-3.842	0.83114	-4.62256	3.79031e-06	0.00485511	0.0117269	SalineSIV-Saline
PTEN	Homeostatic	4608.56	-0.267784	0.0591947	-4.52378	6.07452e-06	0.00726229	0.0148789	SalineSIV-Saline
STAM	Homeostatic	991.972	-0.509465	0.115531	-4.40975	1.03489e-05	0.0115992	0.0221808	SalineSIV-Saline
CLDN11	Homeostatic	5.60553	-5.96605	1.36081	-4.38419	1.16416e-05	0.0122806	0.0235653	SalineSIV-Saline
GRAMD1A	Homeostatic	1185.33	0.612852	0.140815	4.35219	1.34787e-05	0.0134286	0.025848	SalineSIV-Saline
OPCML	Homeostatic	135.979	-2.36453	0.550147	-4.29801	1.72341e-05	0.0162663	0.0292066	SalineSIV-Saline
COMMD9	Homeostatic	326.429	0.662912	0.156055	4.24793	2.15753e-05	0.0193455	0.034179	SalineSIV-Saline
LOC114678823	Homeostatic	7.27121	-6.28234	1.49279	-4.20846	2.57118e-05	0.0211755	0.0386339	SalineSIV-Saline
LOC701212	Homeostatic	44.6364	2.22765	0.52962	4.20613	2.59779e-05	0.0211755	0.0386339	SalineSIV-Saline
LOC106994980	Homeostatic	18.0348	-6.73351	1.60652	-4.19138	2.77264e-05	0.0216182	0.0404096	SalineSIV-Saline
MFHAS1	Homeostatic	355.185	-0.637597	0.154139	-4.13649	3.52651e-05	0.0239988	0.04589	SalineSIV-Saline
LOC107000770	Homeostatic	6.40097	-5.27532	1.27489	-4.13785	3.50578e-05	0.0239988	0.04589	SalineSIV-Saline
GNLY	Homeostatic	12.6801	-3.78123	0.916658	-4.12502	3.707e-05	0.0239988	0.046281	SalineSIV-Saline
GPI	Homeostatic	718.065	0.318769	0.0773233	4.12255	3.74709e-05	0.0239988	0.046281	SalineSIV-Saline
IL21R	Homeostatic	351.505	1.47173	0.354207	4.15499	3.25302e-05	0.0239988	0.0447271	SalineSIV-Saline
LOC114678361	Homeostatic	5.84353	-5.76678	1.40169	-4.11417	3.88577e-05	0.0240288	0.047194	SalineSIV-Saline
LOC114672844	Homeostatic	8.19304	-6.17176	1.5041	-4.10329	4.07318e-05	0.0243481	0.0478743	SalineSIV-Saline
PPM1L	Homeostatic	1402.17	-0.672514	0.165512	-4.06322	4.83997e-05	0.0279985	0.0558159	SalineSIV-Saline
ANGPTL6	Homeostatic	558.866	0.995668	0.246329	4.04203	5.29904e-05	0.0296962	0.0576346	SalineSIV-Saline
ZSWIM5	Homeostatic	306.99	-1.48843	0.371255	-4.00919	6.09265e-05	0.0329965	0.0634262	SalineSIV-Saline
PPAN	Homeostatic	188.002	0.731009	0.182618	4.00294	6.25595e-05	0.0329965	0.0642067	SalineSIV-Saline
TRNAR-CCG-3	Homeostatic	7.22889	-6.01316	1.51122	-3.979	6.92051e-05	0.0354587	0.0681502	SalineSIV-Saline
CDYL	Homeostatic	4306.62	-0.339416	0.0860953	-3.94233	8.06946e-05	0.0388103	0.0763685	SalineSIV-Saline
TMEM236	Homeostatic	267.635	-0.801625	0.203297	-3.94312	8.04272e-05	0.0388103	0.0763685	SalineSIV-Saline
SPAG16	Homeostatic	459.146	-0.722754	0.18412	-3.92545	8.65672e-05	0.0388103	0.0781838	SalineSIV-Saline
GNAQ	Homeostatic	7851.79	-0.303513	0.0772676	-3.92808	8.56274e-05	0.0388103	0.0781838	SalineSIV-Saline
ATXN2L	Homeostatic	1451.87	0.411573	0.104827	3.92622	8.62924e-05	0.0388103	0.0781838	SalineSIV-Saline
TSEN54	Homeostatic	442.138	0.546358	0.139425	3.91864	8.905e-05	0.0389496	0.0781838	SalineSIV-Saline
CLEC7A	Homeostatic	1246.58	2.56341	0.657911	3.89628	9.7681e-05	0.0417075	0.0839473	SalineSIV-Saline
SLC6A11	Homeostatic	65.2014	-2.39045	0.614605	-3.88941	0.000100488	0.0419081	0.0851482	SalineSIV-Saline
ADORA2B	Activated	246.653	7.76815	1.41294	5.49787	3.84404e-08	0.000505068	0.000311248	SalineSIV-Saline
PPP1R14C	Activated	16.3037	-4.32461	0.839393	-5.15207	2.57628e-07	0.000846243	0.00134099	SalineSIV-Saline
LOC114673210	Activated	602.49	5.9261	1.1379	5.20792	1.90969e-07	0.000846243	0.00115969	SalineSIV-Saline
TMC6	Activated	44.4071	3.1358	0.603912	5.19247	2.07518e-07	0.000846243	0.00116325	SalineSIV-Saline
ZSWIM5	Activated	55.3702	-1.76751	0.354659	-4.98369	6.23823e-07	0.00153408	0.00252551	SalineSIV-Saline
SPAG16	Activated	88.1918	-1.16684	0.235192	-4.96121	7.00546e-07	0.00153408	0.00268685	SalineSIV-Saline
MEGF9	Activated	49.3229	-1.30855	0.283318	-4.61866	3.86219e-06	0.00634317	0.0117269	SalineSIV-Saline
ANGPTL6	Activated	107.403	1.17209	0.253279	4.62768	3.69786e-06	0.00634317	0.0117269	SalineSIV-Saline
MTX2	Activated	226.042	-0.641768	0.140573	-4.56536	4.98637e-06	0.00727955	0.0139756	SalineSIV-Saline
LOC114671095	Activated	13.4307	-4.41403	0.976121	-4.52202	6.12535e-06	0.0080481	0.0148789	SalineSIV-Saline
LOC114670012	Activated	22.8336	-1.77573	0.401758	-4.41991	9.874e-06	0.0100662	0.0219935	SalineSIV-Saline
LOC114679371	Activated	99.4382	5.24583	1.1786	4.45088	8.55194e-06	0.0100662	0.0201031	SalineSIV-Saline
TMEM106C	Activated	84.5187	1.19246	0.269907	4.41805	9.95972e-06	0.0100662	0.0219935	SalineSIV-Saline
DTD1	Activated	457.757	-0.893659	0.204199	-4.37641	1.20649e-05	0.0113229	0.0237619	SalineSIV-Saline
LOC677692	Activated	12.2699	3.18962	0.741546	4.30131	1.69789e-05	0.0148724	0.0292066	SalineSIV-Saline
PBX3	Activated	216.988	-0.720508	0.168523	-4.27542	1.9078e-05	0.0156666	0.0315966	SalineSIV-Saline
XRCC4	Activated	453.504	-0.539207	0.126681	-4.25643	2.07716e-05	0.016054	0.0336371	SalineSIV-Saline
PODXL	Activated	12.5963	-3.09148	0.763945	-4.04674	5.1936e-05	0.0341194	0.0573437	SalineSIV-Saline
LOC114672234	Activated	19.0985	-2.14807	0.529049	-4.06025	4.90205e-05	0.0341194	0.0558159	SalineSIV-Saline
TMC8	Activated	12.0433	3.24976	0.802029	4.05192	5.07989e-05	0.0341194	0.0569511	SalineSIV-Saline
NPHS1	Activated	35.1652	-2.82065	0.703067	-4.01193	6.02252e-05	0.0376809	0.0634262	SalineSIV-Saline
LOC114673210	Microglia-like	300.375	6.8481	1.22922	5.57108	2.53169e-08	0.000270384	0.000301278	SalineSIV-Saline
C1H1orf127	Microglia-like	38.6838	2.34485	0.515316	4.55031	5.35666e-06	0.0286046	0.0144574	SalineSIV-Saline
MAGI1	Microglia-like	15.1265	-3.81735	0.88725	-4.30245	1.6892e-05	0.0360813	0.0292066	SalineSIV-Saline
BMT2	Microglia-like	198.211	3.23465	0.749371	4.31648	1.58535e-05	0.0360813	0.0292066	SalineSIV-Saline
IL21R	Microglia-like	29.2378	1.72766	0.400515	4.31359	1.60622e-05	0.0360813	0.0292066	SalineSIV-Saline
GALNT13	Antiviral	24.6151	-1.80175	0.355689	-5.06551	4.07311e-07	0.00336764	0.00174597	SalineSIV-Saline
LOC106995258	Antiviral	26.399	1.58481	0.348919	4.54206	5.57084e-06	0.0230299	0.0144985	SalineSIV-Saline
LOC114673210	CD16+CAM	94.7752	5.21226	1.13896	4.57635	4.73168e-06	0.0310587	0.0137923	SalineSIV-Saline

## Sheet: MorphineSIV_vs_SalineSIV
gene	cluster_id	baseMean	logFC	lfcSE	stat	p_val	p_adj.loc	p_adj.glb	contrast
ADORA2B	Homeostatic	1325.41	-7.44263	1.28031	-5.81316	6.13028e-09	7.37227e-05	0.000223363	MorphineSIV-SalineSIV			p_adj.loc: local adjusted p-value. This is the cluster-specific adjusted p-value. It is derived by correcting fot multiple comparisons within each cell type
FES	Homeostatic	596.75	-0.495652	0.0870184	-5.69594	1.22694e-08	7.37757e-05	0.000298031	MorphineSIV-SalineSIV			p_adj.glb: global adjusted p-value. This is the experiment-wide adjusted p-value. It corrects for multiple comparisons across all clusters and genes
LOC114679371	Homeostatic	557.011	-6.08686	1.09275	-5.5702	2.54445e-08	8.19398e-05	0.000331012	MorphineSIV-SalineSIV			lfcSE: log fold change standard error. It represents the standard error associated with the log fold change estimate for a given gene
RBPMS	Homeostatic	737.295	-8.62199	1.55121	-5.55822	2.72542e-08	8.19398e-05	0.000331012	MorphineSIV-SalineSIV
LOC100499503	Homeostatic	663.353	-6.61882	1.21965	-5.4268	5.73722e-08	0.000132089	0.000544092	MorphineSIV-SalineSIV
LOC106998573	Homeostatic	497.044	-8.68467	1.60768	-5.402	6.59019e-08	0.000132089	0.000544092	MorphineSIV-SalineSIV
CDYL	Homeostatic	4306.62	0.449149	0.0859331	5.22673	1.72533e-07	0.000296412	0.00114299	MorphineSIV-SalineSIV
NAA30	Homeostatic	314.493	0.578327	0.115754	4.99619	5.84751e-07	0.000879027	0.003551	MorphineSIV-SalineSIV
TMEM120A	Homeostatic	108.753	-0.781007	0.160882	-4.85454	1.20669e-06	0.0016124	0.00628098	MorphineSIV-SalineSIV
PTEN	Homeostatic	4608.56	0.285154	0.0590428	4.82961	1.36799e-06	0.00164514	0.00664586	MorphineSIV-SalineSIV
RNGTT	Homeostatic	2959.92	0.475321	0.100621	4.72386	2.31411e-06	0.00231912	0.00843168	MorphineSIV-SalineSIV
CDKAL1	Homeostatic	4355.89	0.369969	0.0781295	4.73533	2.18699e-06	0.00231912	0.0083879	MorphineSIV-SalineSIV
BCKDHB	Homeostatic	346.407	0.583743	0.124701	4.68116	2.85262e-06	0.00263889	0.00989886	MorphineSIV-SalineSIV
FCGR2B	Homeostatic	121.843	-2.36199	0.524757	-4.50112	6.75971e-06	0.00580659	0.0189459	MorphineSIV-SalineSIV
INO80E	Homeostatic	321.591	-0.60456	0.134907	-4.4813	7.41905e-06	0.0059481	0.0199899	MorphineSIV-SalineSIV
RNF103	Homeostatic	657.358	0.575644	0.128884	4.46639	7.95513e-06	0.00597927	0.0199899	MorphineSIV-SalineSIV
CDC73	Homeostatic	2740.47	0.371001	0.0841669	4.40792	1.04369e-05	0.00709657	0.0241886	MorphineSIV-SalineSIV
KLF9	Homeostatic	280.28	0.936435	0.212628	4.40411	1.06218e-05	0.00709657	0.0241886	MorphineSIV-SalineSIV
SLC10A7	Homeostatic	1504.07	0.420955	0.0966071	4.35739	1.3162e-05	0.00828381	0.0274041	MorphineSIV-SalineSIV
RENBP	Homeostatic	237.888	-0.691703	0.159108	-4.34739	1.37765e-05	0.00828381	0.0274902	MorphineSIV-SalineSIV
SCHIP1	Homeostatic	112.176	3.24457	0.748578	4.3343	1.46222e-05	0.00837365	0.0274902	MorphineSIV-SalineSIV
TULP2	Homeostatic	99.8425	1.04603	0.242132	4.32007	1.55982e-05	0.00852656	0.0277238	MorphineSIV-SalineSIV
PBX3	Homeostatic	1098.25	0.632604	0.147227	4.2968	1.73281e-05	0.00906033	0.0293659	MorphineSIV-SalineSIV
FOXO3	Homeostatic	4349.59	0.333897	0.0784005	4.25886	2.05474e-05	0.00951679	0.0319011	MorphineSIV-SalineSIV
DTWD2	Homeostatic	307.229	0.534592	0.125412	4.26268	2.01994e-05	0.00951679	0.0319011	MorphineSIV-SalineSIV
ARHGDIB	Homeostatic	1619.18	-0.463156	0.108759	-4.25856	2.05751e-05	0.00951679	0.0319011	MorphineSIV-SalineSIV
LOC114673849	Homeostatic	101.636	0.973221	0.229235	4.24552	2.18088e-05	0.00971381	0.0324337	MorphineSIV-SalineSIV
PLXNC1	Homeostatic	717.245	1.40945	0.332884	4.23406	2.29509e-05	0.00985742	0.0334496	MorphineSIV-SalineSIV
RETREG2	Homeostatic	350.635	-0.686623	0.162525	-4.22473	2.39222e-05	0.0099203	0.0341816	MorphineSIV-SalineSIV
BBX	Homeostatic	3151.52	0.384082	0.0922829	4.162	3.1547e-05	0.0126461	0.0430654	MorphineSIV-SalineSIV
LOC708768	Homeostatic	300.421	-1.42636	0.344391	-4.1417	3.44747e-05	0.0133132	0.0448615	MorphineSIV-SalineSIV
GSK3B	Homeostatic	5961.16	0.328847	0.0795188	4.13546	3.5425e-05	0.0133132	0.0449799	MorphineSIV-SalineSIV
MSL2	Homeostatic	1572.83	0.424048	0.104102	4.0734	4.63309e-05	0.0153514	0.0477439	MorphineSIV-SalineSIV
LOC710897	Homeostatic	876.967	0.516414	0.127739	4.04274	5.28302e-05	0.0153514	0.0499979	MorphineSIV-SalineSIV
STAM	Homeostatic	991.972	0.465692	0.115291	4.03929	5.36136e-05	0.0153514	0.0500477	MorphineSIV-SalineSIV
PDZD8	Homeostatic	1854.78	0.369652	0.0907686	4.07247	4.65174e-05	0.0153514	0.0477439	MorphineSIV-SalineSIV
MTX2	Homeostatic	1116.46	0.459839	0.113293	4.05883	4.93182e-05	0.0153514	0.0492317	MorphineSIV-SalineSIV
GNAQ	Homeostatic	7851.79	0.312815	0.0771937	4.05234	5.07075e-05	0.0153514	0.0492687	MorphineSIV-SalineSIV
PSPC1	Homeostatic	3966.35	0.313618	0.077458	4.04887	5.14645e-05	0.0153514	0.0493463	MorphineSIV-SalineSIV
ZNF407	Homeostatic	4105.31	0.41652	0.102784	4.05238	5.06999e-05	0.0153514	0.0492687	MorphineSIV-SalineSIV
GIPC1	Homeostatic	105.297	-1.10065	0.269346	-4.08638	4.38164e-05	0.0153514	0.0477439	MorphineSIV-SalineSIV
TOMM40	Homeostatic	201.975	-0.735439	0.180263	-4.07982	4.50714e-05	0.0153514	0.0477439	MorphineSIV-SalineSIV
MRC2	Homeostatic	2186.58	-0.480637	0.119332	-4.02772	5.63202e-05	0.0157513	0.0506687	MorphineSIV-SalineSIV
PELI2	Homeostatic	2289.46	0.520252	0.130066	3.9999	6.33686e-05	0.0173198	0.0536953	MorphineSIV-SalineSIV
GPI	Homeostatic	718.065	-0.30555	0.0768985	-3.97342	7.08475e-05	0.0189336	0.0573644	MorphineSIV-SalineSIV
LOC703641	Homeostatic	5344.92	-0.649088	0.16496	-3.93481	8.32626e-05	0.0208608	0.064548	MorphineSIV-SalineSIV
LOC713572	Homeostatic	1210.48	-0.780962	0.198237	-3.93953	8.16405e-05	0.0208608	0.063971	MorphineSIV-SalineSIV
PIP4K2A	Homeostatic	3713.43	0.404758	0.102697	3.94129	8.10429e-05	0.0208608	0.063971	MorphineSIV-SalineSIV
ZBTB10	Homeostatic	792.111	0.561189	0.14328	3.91672	8.97604e-05	0.0215892	0.0681357	MorphineSIV-SalineSIV
SCN1B	Homeostatic	1834.72	-0.945185	0.241317	-3.91677	8.97419e-05	0.0215892	0.0681357	MorphineSIV-SalineSIV
LOC106996511	Homeostatic	92.0463	1.33019	0.340207	3.90994	9.23171e-05	0.0217687	0.069354	MorphineSIV-SalineSIV
SNX22	Homeostatic	302.083	-0.652641	0.167312	-3.90074	9.58984e-05	0.0221784	0.070589	MorphineSIV-SalineSIV
EXOC4	Homeostatic	5458.54	0.342637	0.0882947	3.88061	0.000104194	0.0232045	0.0730082	MorphineSIV-SalineSIV
VEGFB	Homeostatic	381.36	-0.674131	0.173696	-3.8811	0.000103986	0.0232045	0.0730082	MorphineSIV-SalineSIV
PTGIR	Homeostatic	83.5622	-1.2872	0.332214	-3.87462	0.000106789	0.02335	0.0741139	MorphineSIV-SalineSIV
NFE2L3	Homeostatic	669.845	0.989351	0.256338	3.85956	0.000113592	0.0239658	0.0773612	MorphineSIV-SalineSIV
SRBD1	Homeostatic	1519.88	0.318416	0.082415	3.86357	0.000111741	0.0239658	0.0768188	MorphineSIV-SalineSIV
TBL1XR1	Homeostatic	6473.71	0.30168	0.0785167	3.84224	0.000121914	0.0249338	0.0807375	MorphineSIV-SalineSIV
YTHDF3	Homeostatic	2701.14	0.466282	0.121488	3.83809	0.000123996	0.0249338	0.0807375	MorphineSIV-SalineSIV
ARAF	Homeostatic	324.803	-0.577734	0.150558	-3.83729	0.0001244	0.0249338	0.0807375	MorphineSIV-SalineSIV
SPATA5	Homeostatic	2665.15	0.476081	0.124613	3.82046	0.000133204	0.0254272	0.0808904	MorphineSIV-SalineSIV
FOXO1	Homeostatic	2357.14	0.498307	0.130362	3.82248	0.000132114	0.0254272	0.0808904	MorphineSIV-SalineSIV
GRAMD1A	Homeostatic	1185.33	-0.53662	0.140425	-3.82141	0.000132692	0.0254272	0.0808904	MorphineSIV-SalineSIV
ZFAND3	Homeostatic	7164.13	0.286768	0.0752385	3.81146	0.00013815	0.0259592	0.0825185	MorphineSIV-SalineSIV
PRDM2	Homeostatic	4004.68	0.28702	0.075411	3.80608	0.000141188	0.026122	0.0829731	MorphineSIV-SalineSIV
DCAF6	Homeostatic	3097.3	0.813194	0.215324	3.77661	0.00015898	0.0277086	0.0837993	MorphineSIV-SalineSIV
SUPT3H	Homeostatic	5438.99	0.400831	0.106131	3.77676	0.000158881	0.0277086	0.0837993	MorphineSIV-SalineSIV
NARF	Homeostatic	319.796	-0.477423	0.1264	-3.77709	0.000158672	0.0277086	0.0837993	MorphineSIV-SalineSIV
WDR83	Homeostatic	234.584	-0.541461	0.143104	-3.7837	0.000154516	0.0277086	0.0837993	MorphineSIV-SalineSIV
GAB1	Homeostatic	1301.12	0.379484	0.100604	3.77207	0.0001619	0.0278145	0.0837993	MorphineSIV-SalineSIV
FTO	Homeostatic	3270.11	0.348996	0.0928022	3.76065	0.000169475	0.0287058	0.0857639	MorphineSIV-SalineSIV
PPP2R2A	Homeostatic	3153.86	0.366827	0.0977921	3.7511	0.000176064	0.0294076	0.0864153	MorphineSIV-SalineSIV
SPRED1	Homeostatic	6726.83	0.283516	0.075722	3.74417	0.000180994	0.0298168	0.0879291	MorphineSIV-SalineSIV
CSF3R	Homeostatic	220.622	-1.16259	0.310876	-3.73974	0.000184214	0.0299372	0.0888093	MorphineSIV-SalineSIV
GPATCH2	Homeostatic	1745.95	0.297252	0.0797093	3.7292	0.00019209	0.0303957	0.0895402	MorphineSIV-SalineSIV
PLD3	Homeostatic	1495.01	-0.407097	0.109123	-3.73064	0.00019099	0.0303957	0.0895402	MorphineSIV-SalineSIV
IRF7	Homeostatic	72.6589	-1.30167	0.34958	-3.72352	0.000196464	0.0306841	0.0899025	MorphineSIV-SalineSIV
TTF1	Homeostatic	802.73	-0.628367	0.169415	-3.70903	0.000208056	0.0320779	0.0916662	MorphineSIV-SalineSIV
MFHAS1	Homeostatic	355.185	0.569436	0.153794	3.70259	0.000213409	0.0320807	0.0917129	MorphineSIV-SalineSIV
BABAM2	Homeostatic	5197.43	0.279823	0.0755242	3.70507	0.000211328	0.0320807	0.0916662	MorphineSIV-SalineSIV
CHCHD3	Homeostatic	2612.44	0.395848	0.107072	3.69702	0.000218143	0.0323875	0.0919267	MorphineSIV-SalineSIV
MICAL1	Homeostatic	514.722	-0.42056	0.113901	-3.69232	0.000222218	0.0325901	0.0925341	MorphineSIV-SalineSIV
NUDT17	Homeostatic	170.315	-0.62501	0.169496	-3.68747	0.000226496	0.0326947	0.09325	MorphineSIV-SalineSIV
LOC712203	Homeostatic	146.299	-0.633802	0.171978	-3.68537	0.000228368	0.0326947	0.0934923	MorphineSIV-SalineSIV
LRRC70	Homeostatic	137.364	0.676387	0.183934	3.67733	0.000235692	0.0333462	0.0948913	MorphineSIV-SalineSIV
PPM1L	Homeostatic	1402.17	0.604151	0.165388	3.65292	0.000259271	0.0356649	0.0998856	MorphineSIV-SalineSIV
TMEM106C	Homeostatic	472.225	-0.89126	0.243746	-3.65651	0.000255676	0.0356649	0.0993486	MorphineSIV-SalineSIV
LCLAT1	Homeostatic	688.312	0.6365	0.174324	3.65124	0.000260977	0.0356649	0.0998856	MorphineSIV-SalineSIV
AGPS	Homeostatic	2859.6	0.323701	0.0887642	3.64675	0.000265574	0.0358853	0.0998856	MorphineSIV-SalineSIV
ZBTB43	Homeostatic	783.153	0.276566	0.0761116	3.6337	0.00027939	0.0369225	0.10231	MorphineSIV-SalineSIV
CNP	Homeostatic	271.194	-0.44382	0.122078	-3.63553	0.000277406	0.0369225	0.102097	MorphineSIV-SalineSIV
BMT2	Homeostatic	2886.76	-2.44836	0.677191	-3.61547	0.0002998	0.0387677	0.105671	MorphineSIV-SalineSIV
PPM1A	Homeostatic	2203.14	0.594252	0.164362	3.6155	0.000299768	0.0387677	0.105671	MorphineSIV-SalineSIV
GRM8	Homeostatic	70.3805	1.42776	0.397748	3.58962	0.000331166	0.0408214	0.112261	MorphineSIV-SalineSIV
RPS6KA5	Homeostatic	3427.32	0.346799	0.0966116	3.58962	0.000331162	0.0408214	0.112261	MorphineSIV-SalineSIV
BCL2L11	Homeostatic	1252.8	0.479683	0.133674	3.58845	0.000332654	0.0408214	0.112261	MorphineSIV-SalineSIV
LOC114673210	Homeostatic	3192.9	-3.94268	1.0971	-3.59373	0.000325978	0.0408214	0.112261	MorphineSIV-SalineSIV
CNN3	Homeostatic	66.0904	-2.91839	0.815231	-3.57983	0.00034382	0.0409384	0.11286	MorphineSIV-SalineSIV
SLC4A5	Homeostatic	182.81	0.987105	0.275487	3.58312	0.000339514	0.0409384	0.112459	MorphineSIV-SalineSIV
KNOP1	Homeostatic	229.429	-0.563472	0.157394	-3.58001	0.000343585	0.0409384	0.11286	MorphineSIV-SalineSIV
NEK11	Homeostatic	80.0191	1.04659	0.292895	3.57327	0.000352551	0.0415665	0.114693	MorphineSIV-SalineSIV
RSRC1	Homeostatic	3234.82	0.339131	0.0950742	3.56701	0.000361072	0.0417524	0.116227	MorphineSIV-SalineSIV
DDX10	Homeostatic	1611.24	0.463808	0.130003	3.56766	0.000360182	0.0417524	0.116227	MorphineSIV-SalineSIV
GABPA	Homeostatic	1265.6	0.311309	0.0876271	3.55266	0.000381358	0.0432661	0.119515	MorphineSIV-SalineSIV
FKBP8	Homeostatic	292.726	-0.578805	0.162831	-3.55464	0.000378502	0.0432661	0.119403	MorphineSIV-SalineSIV
DOK1	Homeostatic	839.467	-0.623466	0.175868	-3.54508	0.000392501	0.0441141	0.121196	MorphineSIV-SalineSIV
LOC106993192	Homeostatic	263.383	-0.444162	0.125435	-3.54096	0.000398681	0.0443938	0.122585	MorphineSIV-SalineSIV
SIAH1	Homeostatic	848.421	0.457146	0.129334	3.53461	0.000408385	0.0450572	0.123999	MorphineSIV-SalineSIV
IPO11	Homeostatic	1917.34	0.327033	0.0926065	3.53143	0.000413321	0.0451872	0.124977	MorphineSIV-SalineSIV
RNF187	Homeostatic	209.994	-0.638903	0.181106	-3.52778	0.000419063	0.0454023	0.125156	MorphineSIV-SalineSIV
CPEB2	Homeostatic	2510.54	0.405069	0.1153	3.51316	0.000442804	0.0472046	0.129122	MorphineSIV-SalineSIV
LOC114669888	Homeostatic	127.827	1.32769	0.377967	3.51272	0.000443549	0.0472046	0.129122	MorphineSIV-SalineSIV
EXT1	Homeostatic	4216.27	0.38507	0.109749	3.50862	0.000450432	0.0475166	0.129739	MorphineSIV-SalineSIV
OSBPL8	Homeostatic	3403.7	0.254599	0.0726512	3.5044	0.000457631	0.0478563	0.13046	MorphineSIV-SalineSIV
ARID1B	Homeostatic	6302.52	0.287995	0.0822575	3.50114	0.000463274	0.0480288	0.131361	MorphineSIV-SalineSIV
POU2F2	Homeostatic	1107.91	-0.576368	0.164752	-3.49839	0.000468076	0.0481118	0.132208	MorphineSIV-SalineSIV
SIPA1L1	Homeostatic	3791.45	0.351828	0.100642	3.49585	0.000472554	0.0481604	0.132957	MorphineSIV-SalineSIV
ABTB1	Homeostatic	357.919	-0.524724	0.150202	-3.49346	0.000476805	0.0481853	0.133125	MorphineSIV-SalineSIV
LOC106997205	Homeostatic	293.351	-0.936936	0.268696	-3.48697	0.00048853	0.0489589	0.134849	MorphineSIV-SalineSIV
TMTC2	Homeostatic	172.404	-3.00501	0.864014	-3.47797	0.000505226	0.0498021	0.137376	MorphineSIV-SalineSIV
IL21R	Homeostatic	351.505	-1.22854	0.353116	-3.47914	0.000503029	0.0498021	0.137376	MorphineSIV-SalineSIV
ADORA2B	Activated	246.653	-7.40828	1.37711	-5.37957	7.46641e-08	0.000249079	0.000544092	MorphineSIV-SalineSIV
RNGTT	Activated	634.208	0.528825	0.114105	4.63455	3.57707e-06	0.00596656	0.0113334	MorphineSIV-SalineSIV
RPS6KA5	Activated	705.53	0.414699	0.0927626	4.47054	7.80216e-06	0.00867601	0.0199899	MorphineSIV-SalineSIV
CDYL	Activated	872.661	0.449993	0.102374	4.39558	1.10479e-05	0.00921393	0.0243964	MorphineSIV-SalineSIV
AGPS	Activated	599.385	0.434972	0.100933	4.30953	1.63603e-05	0.0109156	0.0283859	MorphineSIV-SalineSIV
LOC703641	Activated	817.916	-0.748211	0.182806	-4.09293	4.25952e-05	0.0172318	0.0477439	MorphineSIV-SalineSIV
XRCC4	Activated	453.504	0.508496	0.124187	4.09461	4.22876e-05	0.0172318	0.0477439	MorphineSIV-SalineSIV
DTD1	Activated	457.757	0.824697	0.202498	4.07261	4.64886e-05	0.0172318	0.0477439	MorphineSIV-SalineSIV
MTX2	Activated	226.042	0.570169	0.137116	4.1583	3.20619e-05	0.0172318	0.0430654	MorphineSIV-SalineSIV
SIPA1L1	Activated	847.857	0.476677	0.118514	4.02211	5.76803e-05	0.0192421	0.0508019	MorphineSIV-SalineSIV
SCN1B	Activated	324.875	-0.986355	0.249141	-3.95903	7.52546e-05	0.0228227	0.0602632	MorphineSIV-SalineSIV
FCGR2A	Activated	240.818	-0.987452	0.261502	-3.77609	0.000159312	0.0242827	0.0837993	MorphineSIV-SalineSIV
PRDM2	Activated	815.966	0.308092	0.0819053	3.76157	0.00016885	0.0242827	0.0857639	MorphineSIV-SalineSIV
RYBP	Activated	512.783	0.606693	0.162658	3.72988	0.000191573	0.0242827	0.0895402	MorphineSIV-SalineSIV
GSK3B	Activated	1238.95	0.337382	0.0885945	3.80816	0.000140007	0.0242827	0.0829482	MorphineSIV-SalineSIV
BBX	Activated	668.775	0.402687	0.107858	3.73351	0.000188828	0.0242827	0.0895402	MorphineSIV-SalineSIV
EXOC4	Activated	1156.98	0.403297	0.108249	3.72564	0.00019482	0.0242827	0.0898541	MorphineSIV-SalineSIV
SUPT3H	Activated	1083.41	0.431483	0.116008	3.71942	0.00019968	0.0242827	0.0903793	MorphineSIV-SalineSIV
CPEB2	Activated	471.945	0.451806	0.119476	3.78156	0.000155847	0.0242827	0.0837993	MorphineSIV-SalineSIV
SLC10A7	Activated	300.992	0.48619	0.12917	3.76395	0.000167253	0.0242827	0.0857639	MorphineSIV-SalineSIV
SPRED1	Activated	1309.36	0.299771	0.0784306	3.82211	0.000132313	0.0242827	0.0808904	MorphineSIV-SalineSIV
PPM1A	Activated	449.004	0.601269	0.156824	3.83403	0.000126059	0.0242827	0.0807375	MorphineSIV-SalineSIV
PTEN	Activated	876.006	0.320782	0.0863654	3.71424	0.000203811	0.0242827	0.091607	MorphineSIV-SalineSIV
TBC1D12	Activated	904.278	0.415526	0.106775	3.89159	9.95876e-05	0.0242827	0.0725715	MorphineSIV-SalineSIV
MRC2	Activated	433.399	-0.483343	0.126122	-3.83235	0.000126927	0.0242827	0.0807375	MorphineSIV-SalineSIV
PSPC1	Activated	785.215	0.340993	0.0900404	3.78711	0.000152407	0.0242827	0.0837993	MorphineSIV-SalineSIV
PLD3	Activated	298.976	-0.522068	0.136493	-3.82487	0.000130842	0.0242827	0.0808904	MorphineSIV-SalineSIV
ARHGAP6	Activated	439.907	0.663284	0.177914	3.72812	0.000192911	0.0242827	0.0895402	MorphineSIV-SalineSIV
ATF2	Activated	385.258	0.411297	0.111225	3.69787	0.000217417	0.0250105	0.0919267	MorphineSIV-SalineSIV
EXOC6B	Activated	740.79	0.391575	0.106393	3.68047	0.000232805	0.025888	0.09425	MorphineSIV-SalineSIV
DCAF6	Activated	709.468	0.784293	0.215104	3.6461	0.000266246	0.0271192	0.0998856	MorphineSIV-SalineSIV
USP4	Activated	278.146	-0.462045	0.126861	-3.64215	0.00027037	0.0271192	0.100523	MorphineSIV-SalineSIV
CDKAL1	Activated	879.158	0.360844	0.0997103	3.61893	0.000295828	0.0271192	0.105671	MorphineSIV-SalineSIV
GALNT10	Activated	711.256	0.377434	0.104168	3.62333	0.000290831	0.0271192	0.10544	MorphineSIV-SalineSIV
PIP4K2A	Activated	826.573	0.386493	0.106922	3.61471	0.000300683	0.0271192	0.105671	MorphineSIV-SalineSIV
TANC2	Activated	495.371	0.455191	0.12593	3.61463	0.000300782	0.0271192	0.105671	MorphineSIV-SalineSIV
WDFY2	Activated	1120.92	0.29753	0.0816247	3.6451	0.000267286	0.0271192	0.0998856	MorphineSIV-SalineSIV
LOC114673210	Activated	602.49	-4.05493	1.12848	-3.59328	0.000326541	0.0286669	0.112261	MorphineSIV-SalineSIV
SPATA5	Activated	551.164	0.464504	0.129534	3.58596	0.000335835	0.0287268	0.112261	MorphineSIV-SalineSIV
TTC28	Activated	936.247	0.401764	0.112351	3.57598	0.00034892	0.0290999	0.11402	MorphineSIV-SalineSIV
ABI1	Activated	1293.55	0.34832	0.0978702	3.559	0.000372264	0.0302896	0.117946	MorphineSIV-SalineSIV
BMT2	Activated	545.799	-2.3695	0.668268	-3.54573	0.000391525	0.0303751	0.121196	MorphineSIV-SalineSIV
PLXNC1	Activated	254.568	0.940295	0.264883	3.54985	0.000385453	0.0303751	0.120037	MorphineSIV-SalineSIV
FOXO1	Activated	463.804	0.549416	0.155222	3.53955	0.000400814	0.030389	0.122723	MorphineSIV-SalineSIV
ZFAND3	Activated	1447.34	0.301992	0.0855872	3.52847	0.00041797	0.0309855	0.125156	MorphineSIV-SalineSIV
NFIA	Activated	1169.58	0.377877	0.107349	3.52009	0.000431405	0.0312862	0.127794	MorphineSIV-SalineSIV
TCF12	Activated	1713.83	0.287251	0.0833663	3.44564	0.0005697	0.0395941	0.146766	MorphineSIV-SalineSIV
PARD3B	Activated	287.135	1.07023	0.310169	3.45049	0.000559564	0.0395941	0.146766	MorphineSIV-SalineSIV
SNX25	Activated	215.351	0.421102	0.124015	3.39558	0.000684829	0.0466243	0.156024	MorphineSIV-SalineSIV
GNAQ	Activated	1615.92	0.318031	0.0940103	3.38294	0.000717138	0.0478474	0.159814	MorphineSIV-SalineSIV
SCN1B	Antiviral	55.3961	-1.25117	0.261058	-4.79267	1.64578e-06	0.0136073	0.00749572	MorphineSIV-SalineSIV
LRRC28	CD16+CAM	20.8422	1.56289	0.360764	4.33218	1.47641e-05	0.049524	0.0274902	MorphineSIV-SalineSIV
SLC2A6	CD16+CAM	21.1567	-1.66367	0.384451	-4.32738	1.50896e-05	0.049524	0.0274902	MorphineSIV-SalineSIV
